# Supplementary material for: Site-Specific Secretome Map Evidences VSMC-Related Markers of Coronary Atherosclerosis Grade and Extent in the Hypercholesterolemic Swine
Source: Dis Markers. 2015 Aug 25;2015:465242. doi: 10.1155/2015/465242 (PMC4561865; doi:10.1155/2015/465242)
Supplement: Supplementary file 1 — Table S1: List of identified proteins in secretome of HF and CTRL artery samples. Table S2: List of identified peptides for protein in secretome of HF and CTRL artery samples Table S3: Protein list and MS-based protein expressions Table S4, page 1. Histomorphometric data of 134 coronary segments analysed in HF group. Figure S1, page 2. Box plots of Western blot results of CHI3L1 and Cat-D in secretome samples. Figure S2, page 3. Immunostaining micrographs of cell co-localization of anti CHI3L1 with anti CD107a and with anti Mac387 Figure S3, page 4. Double immunostaining micrographs of anti-CHI3L1 and anti-CD107a. Figure S4, page 5. Scatter plot of the relation between average IT values of RCA secretome samples and average IT of all other coronary segments analyzed in each HF case. Figure S5, page 6. Plot of Principal Component Analysis of MS data of secretome samples. [file 465242.f1.zip]

Archive with 5 entries (4 files):
- 465242.f1/
- 465242.f1/465242.f1.docx
- 465242.f1/PeptideSummary-Table S2_Supplementary Material.xlsx
- 465242.f1/Protein Expression-Table S3_Supplemantary Material.xlsx
- 465242.f1/ProteinSummary-TableS1_Supplementary Material.xlsx
