# Supplementary material for: Site-Specific Secretome Map Evidences VSMC-Related Markers of Coronary Atherosclerosis Grade and Extent in the Hypercholesterolemic Swine
Source: Dis Markers. 2015 Aug 25;2015:465242. doi: 10.1155/2015/465242 (PMC4561865; doi:10.1155/2015/465242)
Supplement: Supplementary file 1 — Table S1: List of identified proteins in secretome of HF and CTRL artery samples. Table S2: List of identified peptides for protein in secretome of HF and CTRL artery samples Table S3: Protein list and MS-based protein expressions Table S4, page 1. Histomorphometric data of 134 coronary segments analysed in HF group. Figure S1, page 2. Box plots of Western blot results of CHI3L1 and Cat-D in secretome samples. Figure S2, page 3. Immunostaining micrographs of cell co-localization of anti CHI3L1 with anti CD107a and with anti Mac387 Figure S3, page 4. Double immunostaining micrographs of anti-CHI3L1 and anti-CD107a. Figure S4, page 5. Scatter plot of the relation between average IT values of RCA secretome samples and average IT of all other coronary segments analyzed in each HF case. Figure S5, page 6. Plot of Principal Component Analysis of MS data of secretome samples. [file 465242.f1.zip › 465242.f1/PeptideSummary-Table S2_Supplementary Material.xlsx]

## Sheet: CTRL+Lesione+4mesi_PeptideSumma
Table S2: List of identified peptides for protein in secretome of HF and CTRL artery samples
Total	%Cov(95)	Uniprot	Gene name	Name	Contribute	Confidence	Sequence	Modifications	Cleavages	Prec MW	Prec m/z	Theor MW	Theor m/z	Theor z	Score
17.34	26.66	P54612	2AAA_PIG	Serine/threonine-protein phosphatase 2A 65 kDa regulatory subunit A alpha isoform OS=Sus scrofa GN=PPP2R1A PE=2 SV=2	2	99	AAADGDDSLYPIAVLIDELR	Protein Terminal Acetyl@N-term	cleaved M-A@N-term	2158.08	720.367	2158.08	720.367	3	9
17.34	26.66	P54612	2AAA_PIG	Serine/threonine-protein phosphatase 2A 65 kDa regulatory subunit A alpha isoform OS=Sus scrofa GN=PPP2R1A PE=2 SV=2	2	99	AISHEHSPSDLEAHFVPLVK			2212.13	738.384	2212.13	738.383	3	12
17.34	26.66	P54612	2AAA_PIG	Serine/threonine-protein phosphatase 2A 65 kDa regulatory subunit A alpha isoform OS=Sus scrofa GN=PPP2R1A PE=2 SV=2	2	99	DNTIEHLLPLFLAQLK			1864.05	622.356	1864.05	622.356	3	7
17.34	26.66	P54612	2AAA_PIG	Serine/threonine-protein phosphatase 2A 65 kDa regulatory subunit A alpha isoform OS=Sus scrofa GN=PPP2R1A PE=2 SV=2	2	99	FSNLASDEQDSVR		cleaved M-F@N-term	1466.66	734.339	1466.66	734.339	2	16
17.34	26.66	P54612	2AAA_PIG	Serine/threonine-protein phosphatase 2A 65 kDa regulatory subunit A alpha isoform OS=Sus scrofa GN=PPP2R1A PE=2 SV=2	2	99	IGPILDNSTLQSEVKPILEK	Deamidated(N)@7		2194.2	732.406	2194.21	732.411	3	13
17.34	26.66	P54612	2AAA_PIG	Serine/threonine-protein phosphatase 2A 65 kDa regulatory subunit A alpha isoform OS=Sus scrofa GN=PPP2R1A PE=2 SV=2	2	99	LNIISNLDCVNEVIGIR	Carboxymethyl(C)@9		1941.03	971.524	1942.02	972.017	2	10
17.34	26.66	P54612	2AAA_PIG	Serine/threonine-protein phosphatase 2A 65 kDa regulatory subunit A alpha isoform OS=Sus scrofa GN=PPP2R1A PE=2 SV=2	2	99	QLSQSLLPAIVELAEDAK			1924.06	642.359	1924.05	642.358	3	10
17.34	26.66	P54612	2AAA_PIG	Serine/threonine-protein phosphatase 2A 65 kDa regulatory subunit A alpha isoform OS=Sus scrofa GN=PPP2R1A PE=2 SV=2	2	99	SALASVIMGLSPILGK			1555.9	778.956	1555.9	778.958	2	10
17.34	26.66	P54612	2AAA_PIG	Serine/threonine-protein phosphatase 2A 65 kDa regulatory subunit A alpha isoform OS=Sus scrofa GN=PPP2R1A PE=2 SV=2	0.651695	99	LLPPLESLATVEETVVR		cleaved C-L@N-term	1865.05	933.532	1865.05	933.533	2	12
17.34	26.66	P54612	2AAA_PIG	Serine/threonine-protein phosphatase 2A 65 kDa regulatory subunit A alpha isoform OS=Sus scrofa GN=PPP2R1A PE=2 SV=2	0.473661	91.36	TDLVPAFQNLMK			1375.72	688.866	1375.72	688.866	2	5
17.34	26.66	P54612	2AAA_PIG	Serine/threonine-protein phosphatase 2A 65 kDa regulatory subunit A alpha isoform OS=Sus scrofa GN=PPP2R1A PE=2 SV=2	0.160522	70.45	LAGGDWFTSR			1108.53	555.273	1108.53	555.272	2	7
17.34	26.66	P54612	2AAA_PIG	Serine/threonine-protein phosphatase 2A 65 kDa regulatory subunit A alpha isoform OS=Sus scrofa GN=PPP2R1A PE=2 SV=2	0.0352691	30.99	YFAQEALTVLSLA			1424.75	713.384	1424.76	713.385	2	5
17.34	26.66	P54612	2AAA_PIG	Serine/threonine-protein phosphatase 2A 65 kDa regulatory subunit A alpha isoform OS=Sus scrofa GN=PPP2R1A PE=2 SV=2	0	99	AAADGDDSLYPIAVLIDELR	Protein Terminal Acetyl@N-term	cleaved M-A@N-term	2158.14	720.386	2158.08	720.367	3	7
17.34	26.66	P54612	2AAA_PIG	Serine/threonine-protein phosphatase 2A 65 kDa regulatory subunit A alpha isoform OS=Sus scrofa GN=PPP2R1A PE=2 SV=2	0	99	AAADGDDSLYPIAVLIDELR	Protein Terminal Acetyl@N-term	cleaved M-A@N-term	2158.1	1080.06	2158.08	1080.05	2	13
17.34	26.66	P54612	2AAA_PIG	Serine/threonine-protein phosphatase 2A 65 kDa regulatory subunit A alpha isoform OS=Sus scrofa GN=PPP2R1A PE=2 SV=2	0	99	AAADGDDSLYPIAVLIDELR	Protein Terminal Acetyl@N-term	cleaved M-A@N-term	2158.08	1080.05	2158.08	1080.05	2	6
17.34	26.66	P54612	2AAA_PIG	Serine/threonine-protein phosphatase 2A 65 kDa regulatory subunit A alpha isoform OS=Sus scrofa GN=PPP2R1A PE=2 SV=2	0	99	AAADGDDSLYPIAVLIDELR	Protein Terminal Acetyl@N-term	cleaved M-A@N-term	2158.08	1080.05	2158.08	1080.05	2	7
17.34	26.66	P54612	2AAA_PIG	Serine/threonine-protein phosphatase 2A 65 kDa regulatory subunit A alpha isoform OS=Sus scrofa GN=PPP2R1A PE=2 SV=2	0	36.62	AISHEHSPSDLEAHFVPLVK			2212.13	738.384	2212.13	738.383	3	6
17.34	26.66	P54612	2AAA_PIG	Serine/threonine-protein phosphatase 2A 65 kDa regulatory subunit A alpha isoform OS=Sus scrofa GN=PPP2R1A PE=2 SV=2	0	99	DNTIEHLLPLFLAQLK			1864.05	622.356	1864.05	622.356	3	8
17.34	26.66	P54612	2AAA_PIG	Serine/threonine-protein phosphatase 2A 65 kDa regulatory subunit A alpha isoform OS=Sus scrofa GN=PPP2R1A PE=2 SV=2	0	99	DNTIEHLLPLFLAQLK			1864.05	622.356	1864.05	622.356	3	10
17.34	26.66	P54612	2AAA_PIG	Serine/threonine-protein phosphatase 2A 65 kDa regulatory subunit A alpha isoform OS=Sus scrofa GN=PPP2R1A PE=2 SV=2	0	99	DNTIEHLLPLFLAQLK			1864.05	933.03	1864.05	933.03	2	7
17.34	26.66	P54612	2AAA_PIG	Serine/threonine-protein phosphatase 2A 65 kDa regulatory subunit A alpha isoform OS=Sus scrofa GN=PPP2R1A PE=2 SV=2	0	99	DNTIEHLLPLFLAQLK			1864.05	933.03	1864.05	933.03	2	6
17.34	26.66	P54612	2AAA_PIG	Serine/threonine-protein phosphatase 2A 65 kDa regulatory subunit A alpha isoform OS=Sus scrofa GN=PPP2R1A PE=2 SV=2	0	99	DNTIEHLLPLFLAQLK			1864.05	622.356	1864.05	622.356	3	7
17.34	26.66	P54612	2AAA_PIG	Serine/threonine-protein phosphatase 2A 65 kDa regulatory subunit A alpha isoform OS=Sus scrofa GN=PPP2R1A PE=2 SV=2	0	99	DNTIEHLLPLFLAQLK			1864.05	933.035	1864.05	933.03	2	10
17.34	26.66	P54612	2AAA_PIG	Serine/threonine-protein phosphatase 2A 65 kDa regulatory subunit A alpha isoform OS=Sus scrofa GN=PPP2R1A PE=2 SV=2	0	98.43	DNTIEHLLPLFLAQLK			1864.05	933.035	1864.05	933.03	2	8
17.34	26.66	P54612	2AAA_PIG	Serine/threonine-protein phosphatase 2A 65 kDa regulatory subunit A alpha isoform OS=Sus scrofa GN=PPP2R1A PE=2 SV=2	0	96.89	DNTIEHLLPLFLAQLK			1864.05	622.356	1864.05	622.356	3	4
17.34	26.66	P54612	2AAA_PIG	Serine/threonine-protein phosphatase 2A 65 kDa regulatory subunit A alpha isoform OS=Sus scrofa GN=PPP2R1A PE=2 SV=2	0	92.72	DNTIEHLLPLFLAQLK			1864.05	933.03	1864.05	933.03	2	4
17.34	26.66	P54612	2AAA_PIG	Serine/threonine-protein phosphatase 2A 65 kDa regulatory subunit A alpha isoform OS=Sus scrofa GN=PPP2R1A PE=2 SV=2	0	91.85	DNTIEHLLPLFLAQLK			1864.05	622.357	1864.05	622.356	3	8
17.34	26.66	P54612	2AAA_PIG	Serine/threonine-protein phosphatase 2A 65 kDa regulatory subunit A alpha isoform OS=Sus scrofa GN=PPP2R1A PE=2 SV=2	0	34.76	DNTIEHLLPLFLAQLK			1864.04	933.029	1864.05	933.03	2	5
17.34	26.66	P54612	2AAA_PIG	Serine/threonine-protein phosphatase 2A 65 kDa regulatory subunit A alpha isoform OS=Sus scrofa GN=PPP2R1A PE=2 SV=2	0	99	FSNLASDEQDSVR		cleaved M-F@N-term	1466.67	734.34	1466.66	734.339	2	13
17.34	26.66	P54612	2AAA_PIG	Serine/threonine-protein phosphatase 2A 65 kDa regulatory subunit A alpha isoform OS=Sus scrofa GN=PPP2R1A PE=2 SV=2	0	99	FSNLASDEQDSVR		cleaved M-F@N-term	1466.67	734.341	1466.66	734.339	2	9
17.34	26.66	P54612	2AAA_PIG	Serine/threonine-protein phosphatase 2A 65 kDa regulatory subunit A alpha isoform OS=Sus scrofa GN=PPP2R1A PE=2 SV=2	0	99	FSNLASDEQDSVR		cleaved M-F@N-term	1466.67	734.34	1466.66	734.339	2	12
17.34	26.66	P54612	2AAA_PIG	Serine/threonine-protein phosphatase 2A 65 kDa regulatory subunit A alpha isoform OS=Sus scrofa GN=PPP2R1A PE=2 SV=2	0	93.32	FSNLASDEQDSVR		cleaved M-F@N-term	1466.66	734.339	1466.66	734.339	2	9
17.34	26.66	P54612	2AAA_PIG	Serine/threonine-protein phosphatase 2A 65 kDa regulatory subunit A alpha isoform OS=Sus scrofa GN=PPP2R1A PE=2 SV=2	0	99	IGPILDNSTLQSEVKPILEK			2193.22	732.082	2193.23	732.083	3	10
17.34	26.66	P54612	2AAA_PIG	Serine/threonine-protein phosphatase 2A 65 kDa regulatory subunit A alpha isoform OS=Sus scrofa GN=PPP2R1A PE=2 SV=2	0	99	IGPILDNSTLQSEVKPILEK			2193.23	732.083	2193.23	732.083	3	12
17.34	26.66	P54612	2AAA_PIG	Serine/threonine-protein phosphatase 2A 65 kDa regulatory subunit A alpha isoform OS=Sus scrofa GN=PPP2R1A PE=2 SV=2	0	99	IGPILDNSTLQSEVKPILEK			2193.23	732.083	2193.23	732.083	3	9
17.34	26.66	P54612	2AAA_PIG	Serine/threonine-protein phosphatase 2A 65 kDa regulatory subunit A alpha isoform OS=Sus scrofa GN=PPP2R1A PE=2 SV=2	0	99	IGPILDNSTLQSEVKPILEK			2193.23	732.083	2193.23	732.083	3	15
17.34	26.66	P54612	2AAA_PIG	Serine/threonine-protein phosphatase 2A 65 kDa regulatory subunit A alpha isoform OS=Sus scrofa GN=PPP2R1A PE=2 SV=2	0	99	IGPILDNSTLQSEVKPILEK			2193.23	732.083	2193.23	732.083	3	13
17.34	26.66	P54612	2AAA_PIG	Serine/threonine-protein phosphatase 2A 65 kDa regulatory subunit A alpha isoform OS=Sus scrofa GN=PPP2R1A PE=2 SV=2	0	99	IGPILDNSTLQSEVKPILEK			2193.22	732.082	2193.23	732.083	3	12
17.34	26.66	P54612	2AAA_PIG	Serine/threonine-protein phosphatase 2A 65 kDa regulatory subunit A alpha isoform OS=Sus scrofa GN=PPP2R1A PE=2 SV=2	0	95.92	IGPILDNSTLQSEVKPILEK			2193.23	732.083	2193.23	732.083	3	8
17.34	26.66	P54612	2AAA_PIG	Serine/threonine-protein phosphatase 2A 65 kDa regulatory subunit A alpha isoform OS=Sus scrofa GN=PPP2R1A PE=2 SV=2	0	95.04	LNIISNLDCVNEVIGIR	Carboxymethyl(C)@9		1941.03	971.525	1942.02	972.017	2	9
17.34	26.66	P54612	2AAA_PIG	Serine/threonine-protein phosphatase 2A 65 kDa regulatory subunit A alpha isoform OS=Sus scrofa GN=PPP2R1A PE=2 SV=2	0	86.81	LNIISNLDCVNEVIGIR	Carboxymethyl(C)@9		1941.03	971.524	1942.02	972.017	2	8
17.34	26.66	P54612	2AAA_PIG	Serine/threonine-protein phosphatase 2A 65 kDa regulatory subunit A alpha isoform OS=Sus scrofa GN=PPP2R1A PE=2 SV=2	0	79.07	LNIISNLDCVNEVIGIR	Carboxymethyl(C)@9; Amidated@C-term		1941.03	971.524	1941.04	971.525	2	8
17.34	26.66	P54612	2AAA_PIG	Serine/threonine-protein phosphatase 2A 65 kDa regulatory subunit A alpha isoform OS=Sus scrofa GN=PPP2R1A PE=2 SV=2	0	50.31	LNIISNLDCVNEVIGIR	Carboxymethyl(C)@9; Amidated@C-term		1941.04	971.527	1941.04	971.525	2	7
17.34	26.66	P54612	2AAA_PIG	Serine/threonine-protein phosphatase 2A 65 kDa regulatory subunit A alpha isoform OS=Sus scrofa GN=PPP2R1A PE=2 SV=2	0	99	QLSQSLLPAIVELAEDAK			1924.05	963.032	1924.05	963.033	2	8
17.34	26.66	P54612	2AAA_PIG	Serine/threonine-protein phosphatase 2A 65 kDa regulatory subunit A alpha isoform OS=Sus scrofa GN=PPP2R1A PE=2 SV=2	0	99	QLSQSLLPAIVELAEDAK			1924.05	963.031	1924.05	963.033	2	7
17.34	26.66	P54612	2AAA_PIG	Serine/threonine-protein phosphatase 2A 65 kDa regulatory subunit A alpha isoform OS=Sus scrofa GN=PPP2R1A PE=2 SV=2	0	99	QLSQSLLPAIVELAEDAK			1924.05	963.032	1924.05	963.033	2	11
17.34	26.66	P54612	2AAA_PIG	Serine/threonine-protein phosphatase 2A 65 kDa regulatory subunit A alpha isoform OS=Sus scrofa GN=PPP2R1A PE=2 SV=2	0	99	QLSQSLLPAIVELAEDAK			1924.05	642.359	1924.05	642.358	3	5
17.34	26.66	P54612	2AAA_PIG	Serine/threonine-protein phosphatase 2A 65 kDa regulatory subunit A alpha isoform OS=Sus scrofa GN=PPP2R1A PE=2 SV=2	0	99	QLSQSLLPAIVELAEDAK			1924.05	963.034	1924.05	963.033	2	12
17.34	26.66	P54612	2AAA_PIG	Serine/threonine-protein phosphatase 2A 65 kDa regulatory subunit A alpha isoform OS=Sus scrofa GN=PPP2R1A PE=2 SV=2	0	99	QLSQSLLPAIVELAEDAK			1924.05	963.034	1924.05	963.033	2	10
17.34	26.66	P54612	2AAA_PIG	Serine/threonine-protein phosphatase 2A 65 kDa regulatory subunit A alpha isoform OS=Sus scrofa GN=PPP2R1A PE=2 SV=2	0	99	QLSQSLLPAIVELAEDAK			1924.05	963.034	1924.05	963.033	2	7
17.34	26.66	P54612	2AAA_PIG	Serine/threonine-protein phosphatase 2A 65 kDa regulatory subunit A alpha isoform OS=Sus scrofa GN=PPP2R1A PE=2 SV=2	0	99	QLSQSLLPAIVELAEDAK			1924.05	642.358	1924.05	642.358	3	7
17.34	26.66	P54612	2AAA_PIG	Serine/threonine-protein phosphatase 2A 65 kDa regulatory subunit A alpha isoform OS=Sus scrofa GN=PPP2R1A PE=2 SV=2	0	99	QLSQSLLPAIVELAEDAK			1924.05	963.033	1924.05	963.033	2	8
17.34	26.66	P54612	2AAA_PIG	Serine/threonine-protein phosphatase 2A 65 kDa regulatory subunit A alpha isoform OS=Sus scrofa GN=PPP2R1A PE=2 SV=2	0	99	QLSQSLLPAIVELAEDAK			1924.05	963.034	1924.05	963.033	2	6
17.34	26.66	P54612	2AAA_PIG	Serine/threonine-protein phosphatase 2A 65 kDa regulatory subunit A alpha isoform OS=Sus scrofa GN=PPP2R1A PE=2 SV=2	0	95.62	QLSQSLLPAIVELAEDAK			1924.05	642.358	1924.05	642.358	3	5
17.34	26.66	P54612	2AAA_PIG	Serine/threonine-protein phosphatase 2A 65 kDa regulatory subunit A alpha isoform OS=Sus scrofa GN=PPP2R1A PE=2 SV=2	0	83.8	QLSQSLLPAIVELAEDAK	Gln->pyro-Glu@N-term		1907.02	954.519	1907.03	954.52	2	4
17.34	26.66	P54612	2AAA_PIG	Serine/threonine-protein phosphatase 2A 65 kDa regulatory subunit A alpha isoform OS=Sus scrofa GN=PPP2R1A PE=2 SV=2	0	67.29	QLSQSLLPAIVELAEDAK			1924.06	642.359	1924.05	642.358	3	5
17.34	26.66	P54612	2AAA_PIG	Serine/threonine-protein phosphatase 2A 65 kDa regulatory subunit A alpha isoform OS=Sus scrofa GN=PPP2R1A PE=2 SV=2	0	32.07	QLSQSLLPAIVELAEDAK			1924.05	963.034	1924.05	963.033	2	5
17.34	26.66	P54612	2AAA_PIG	Serine/threonine-protein phosphatase 2A 65 kDa regulatory subunit A alpha isoform OS=Sus scrofa GN=PPP2R1A PE=2 SV=2	0	28.03	QLSQSLLPAIVELAEDAK			1924.05	642.358	1924.05	642.358	3	3
17.34	26.66	P54612	2AAA_PIG	Serine/threonine-protein phosphatase 2A 65 kDa regulatory subunit A alpha isoform OS=Sus scrofa GN=PPP2R1A PE=2 SV=2	0	18.2	QLSQSLLPAIVELAEDAK			1924.05	963.034	1924.05	963.033	2	6
17.34	26.66	P54612	2AAA_PIG	Serine/threonine-protein phosphatase 2A 65 kDa regulatory subunit A alpha isoform OS=Sus scrofa GN=PPP2R1A PE=2 SV=2	0	99	SALASVIMGLSPILGK			1555.9	778.958	1555.9	778.958	2	7
17.34	26.66	P54612	2AAA_PIG	Serine/threonine-protein phosphatase 2A 65 kDa regulatory subunit A alpha isoform OS=Sus scrofa GN=PPP2R1A PE=2 SV=2	0	99	SALASVIMGLSPILGK			1555.9	778.958	1555.9	778.958	2	5
17.34	26.66	P54612	2AAA_PIG	Serine/threonine-protein phosphatase 2A 65 kDa regulatory subunit A alpha isoform OS=Sus scrofa GN=PPP2R1A PE=2 SV=2	0	62.4	TDLVPAFQNLMK			1375.72	688.867	1375.72	688.866	2	4
17.34	26.66	P54612	2AAA_PIG	Serine/threonine-protein phosphatase 2A 65 kDa regulatory subunit A alpha isoform OS=Sus scrofa GN=PPP2R1A PE=2 SV=2	0	21.83	YFAQEALTVLSLA			1424.75	713.384	1424.76	713.385	2	5
13	34.4	P14332	6PGD_PIG	6-phosphogluconate dehydrogenase, decarboxylating (Fragment) OS=Sus scrofa GN=PGD PE=2 SV=3	2	99	DAFDRNPGLQNLLLDDFFK		missed R-N@5	2237.11	746.712	2237.11	746.711	3	11
13	34.4	P14332	6PGD_PIG	6-phosphogluconate dehydrogenase, decarboxylating (Fragment) OS=Sus scrofa GN=PGD PE=2 SV=3	2	99	DYFGAHTYELLAK		cleaved K-P@C-term	1526.74	764.378	1526.74	764.378	2	12
13	34.4	P14332	6PGD_PIG	6-phosphogluconate dehydrogenase, decarboxylating (Fragment) OS=Sus scrofa GN=PGD PE=2 SV=3	2	99	HEMLPANLIQAQR			1519.79	507.604	1519.79	507.605	3	12
13	34.4	P14332	6PGD_PIG	6-phosphogluconate dehydrogenase, decarboxylating (Fragment) OS=Sus scrofa GN=PGD PE=2 SV=3	2	99	NPGLQNLLLDDFFK			1632.85	817.432	1632.85	817.433	2	10
13	34.4	P14332	6PGD_PIG	6-phosphogluconate dehydrogenase, decarboxylating (Fragment) OS=Sus scrofa GN=PGD PE=2 SV=3	2	99	WTAISALEYGVPVTLIGEAVFAR			2462.32	821.781	2462.32	821.781	3	7
13	34.4	P14332	6PGD_PIG	6-phosphogluconate dehydrogenase, decarboxylating (Fragment) OS=Sus scrofa GN=PGD PE=2 SV=3	1.14874	98.89	IKDAFDRNPGLQNLLLDDFFK		missed K-D@2; missed R-N@7	2478.29	620.58	2478.29	620.58	4	7
13	34.4	P14332	6PGD_PIG	6-phosphogluconate dehydrogenase, decarboxylating (Fragment) OS=Sus scrofa GN=PGD PE=2 SV=3	1.0655	98.64	SFLEDIR			878.449	440.232	878.45	440.232	2	7
13	34.4	P14332	6PGD_PIG	6-phosphogluconate dehydrogenase, decarboxylating (Fragment) OS=Sus scrofa GN=PGD PE=2 SV=3	0.769551	97.08	IEITANILK			1013.61	507.814	1013.61	507.813	2	4
13	34.4	P14332	6PGD_PIG	6-phosphogluconate dehydrogenase, decarboxylating (Fragment) OS=Sus scrofa GN=PGD PE=2 SV=3	0.0154727	87.64	FTTALSFYDGYR		cleaved C-F@N-term	1439.67	720.842	1439.67	720.843	2	8
13	34.4	P14332	6PGD_PIG	6-phosphogluconate dehydrogenase, decarboxylating (Fragment) OS=Sus scrofa GN=PGD PE=2 SV=3	0.000869459	63.81	HEMLPAN	Oxidation(M)@3	cleaved N-L@C-term	826.432	414.223	826.364	414.189	2	5
13	34.4	P14332	6PGD_PIG	6-phosphogluconate dehydrogenase, decarboxylating (Fragment) OS=Sus scrofa GN=PGD PE=2 SV=3	0	99	DAFDRNPGLQNLLLDDFFK		missed R-N@5	2237.11	746.712	2237.11	746.711	3	10
13	34.4	P14332	6PGD_PIG	6-phosphogluconate dehydrogenase, decarboxylating (Fragment) OS=Sus scrofa GN=PGD PE=2 SV=3	0	99	DAFDRNPGLQNLLLDDFFK		missed R-N@5	2237.11	746.71	2237.11	746.711	3	12
13	34.4	P14332	6PGD_PIG	6-phosphogluconate dehydrogenase, decarboxylating (Fragment) OS=Sus scrofa GN=PGD PE=2 SV=3	0	99	DAFDRNPGLQNLLLDDFFK		missed R-N@5	2237.11	746.71	2237.11	746.711	3	15
13	34.4	P14332	6PGD_PIG	6-phosphogluconate dehydrogenase, decarboxylating (Fragment) OS=Sus scrofa GN=PGD PE=2 SV=3	0	99	DAFDRNPGLQNLLLDDFFK		missed R-N@5	2237.12	746.713	2237.11	746.711	3	11
13	34.4	P14332	6PGD_PIG	6-phosphogluconate dehydrogenase, decarboxylating (Fragment) OS=Sus scrofa GN=PGD PE=2 SV=3	0	98.82	DAFDRNPGLQNLLLDDFFK		missed R-N@5	2237.11	746.712	2237.11	746.711	3	5
13	34.4	P14332	6PGD_PIG	6-phosphogluconate dehydrogenase, decarboxylating (Fragment) OS=Sus scrofa GN=PGD PE=2 SV=3	0	24.34	DAFDRNPGLQNLLLDDFFK		missed R-N@5	2237.12	1119.57	2237.11	1119.56	2	4
13	34.4	P14332	6PGD_PIG	6-phosphogluconate dehydrogenase, decarboxylating (Fragment) OS=Sus scrofa GN=PGD PE=2 SV=3	0	19.06	DAFDRNPGLQNLLLDDFFK		missed R-N@5	2237.12	1119.57	2237.11	1119.56	2	4
13	34.4	P14332	6PGD_PIG	6-phosphogluconate dehydrogenase, decarboxylating (Fragment) OS=Sus scrofa GN=PGD PE=2 SV=3	0	99	DYFGAHTYELLAK		cleaved K-P@C-term	1526.74	764.378	1526.74	764.378	2	15
13	34.4	P14332	6PGD_PIG	6-phosphogluconate dehydrogenase, decarboxylating (Fragment) OS=Sus scrofa GN=PGD PE=2 SV=3	0	99	DYFGAHTYELLAK		cleaved K-P@C-term	1526.74	509.921	1526.74	509.921	3	9
13	34.4	P14332	6PGD_PIG	6-phosphogluconate dehydrogenase, decarboxylating (Fragment) OS=Sus scrofa GN=PGD PE=2 SV=3	0	99	DYFGAHTYELLAK		cleaved K-P@C-term	1526.74	764.377	1526.74	764.378	2	8
13	34.4	P14332	6PGD_PIG	6-phosphogluconate dehydrogenase, decarboxylating (Fragment) OS=Sus scrofa GN=PGD PE=2 SV=3	0	81.19	DYFGAHTYELLAK		cleaved K-P@C-term	1526.74	764.377	1526.74	764.378	2	6
13	34.4	P14332	6PGD_PIG	6-phosphogluconate dehydrogenase, decarboxylating (Fragment) OS=Sus scrofa GN=PGD PE=2 SV=3	0	53.04	HEMLPAN	Oxidation(M)@3	cleaved N-L@C-term	826.432	414.223	826.364	414.189	2	6
13	34.4	P14332	6PGD_PIG	6-phosphogluconate dehydrogenase, decarboxylating (Fragment) OS=Sus scrofa GN=PGD PE=2 SV=3	0	99	HEMLPANLIQAQR			1519.79	507.605	1519.79	507.605	3	14
13	34.4	P14332	6PGD_PIG	6-phosphogluconate dehydrogenase, decarboxylating (Fragment) OS=Sus scrofa GN=PGD PE=2 SV=3	0	91.63	IEITANILK			1013.61	507.812	1013.61	507.813	2	6
13	34.4	P14332	6PGD_PIG	6-phosphogluconate dehydrogenase, decarboxylating (Fragment) OS=Sus scrofa GN=PGD PE=2 SV=3	0	86.24	IEITANILK			1013.61	507.813	1013.61	507.813	2	3
13	34.4	P14332	6PGD_PIG	6-phosphogluconate dehydrogenase, decarboxylating (Fragment) OS=Sus scrofa GN=PGD PE=2 SV=3	0	39.01	IEITANILK			1013.61	507.813	1013.61	507.813	2	3
13	34.4	P14332	6PGD_PIG	6-phosphogluconate dehydrogenase, decarboxylating (Fragment) OS=Sus scrofa GN=PGD PE=2 SV=3	0	38.65	IEITANILK			1013.61	507.811	1013.61	507.813	2	3
13	34.4	P14332	6PGD_PIG	6-phosphogluconate dehydrogenase, decarboxylating (Fragment) OS=Sus scrofa GN=PGD PE=2 SV=3	0	37.56	IEITANILK			1013.61	507.812	1013.61	507.813	2	3
13	34.4	P14332	6PGD_PIG	6-phosphogluconate dehydrogenase, decarboxylating (Fragment) OS=Sus scrofa GN=PGD PE=2 SV=3	0	36.14	IEITANILK			1013.61	507.812	1013.61	507.813	2	3
13	34.4	P14332	6PGD_PIG	6-phosphogluconate dehydrogenase, decarboxylating (Fragment) OS=Sus scrofa GN=PGD PE=2 SV=3	0	28.99	IEITANILK			1013.61	507.812	1013.61	507.813	2	3
13	34.4	P14332	6PGD_PIG	6-phosphogluconate dehydrogenase, decarboxylating (Fragment) OS=Sus scrofa GN=PGD PE=2 SV=3	0	25.26	IEITANILK			1013.61	507.813	1013.61	507.813	2	4
13	34.4	P14332	6PGD_PIG	6-phosphogluconate dehydrogenase, decarboxylating (Fragment) OS=Sus scrofa GN=PGD PE=2 SV=3	0	21.7	IEITANILK			1013.61	507.813	1013.61	507.813	2	5
13	34.4	P14332	6PGD_PIG	6-phosphogluconate dehydrogenase, decarboxylating (Fragment) OS=Sus scrofa GN=PGD PE=2 SV=3	0	20.15	IEITANILK			1013.59	507.801	1013.61	507.813	2	4
13	34.4	P14332	6PGD_PIG	6-phosphogluconate dehydrogenase, decarboxylating (Fragment) OS=Sus scrofa GN=PGD PE=2 SV=3	0	19.01	IEITANILK			1013.61	507.813	1013.61	507.813	2	4
13	34.4	P14332	6PGD_PIG	6-phosphogluconate dehydrogenase, decarboxylating (Fragment) OS=Sus scrofa GN=PGD PE=2 SV=3	0	17.61	IEITANILK			1013.61	507.812	1013.61	507.813	2	6
13	34.4	P14332	6PGD_PIG	6-phosphogluconate dehydrogenase, decarboxylating (Fragment) OS=Sus scrofa GN=PGD PE=2 SV=3	0	15.96	ITANILK	Formyl@N-term	cleaved E-I@N-term	799.48	400.748	799.48	400.747	2	8
13	34.4	P14332	6PGD_PIG	6-phosphogluconate dehydrogenase, decarboxylating (Fragment) OS=Sus scrofa GN=PGD PE=2 SV=3	0	99	NPGLQNLLLDDFFK			1632.85	817.432	1632.85	817.433	2	11
13	34.4	P14332	6PGD_PIG	6-phosphogluconate dehydrogenase, decarboxylating (Fragment) OS=Sus scrofa GN=PGD PE=2 SV=3	0	99	NPGLQNLLLDDFFK			1632.85	817.433	1632.85	817.433	2	14
13	34.4	P14332	6PGD_PIG	6-phosphogluconate dehydrogenase, decarboxylating (Fragment) OS=Sus scrofa GN=PGD PE=2 SV=3	0	99	NPGLQNLLLDDFFK			1632.85	817.433	1632.85	817.433	2	7
13	34.4	P14332	6PGD_PIG	6-phosphogluconate dehydrogenase, decarboxylating (Fragment) OS=Sus scrofa GN=PGD PE=2 SV=3	0	99	NPGLQNLLLDDFFK			1632.85	817.432	1632.85	817.433	2	10
13	34.4	P14332	6PGD_PIG	6-phosphogluconate dehydrogenase, decarboxylating (Fragment) OS=Sus scrofa GN=PGD PE=2 SV=3	0	99	NPGLQNLLLDDFFK			1632.85	817.432	1632.85	817.433	2	12
13	34.4	P14332	6PGD_PIG	6-phosphogluconate dehydrogenase, decarboxylating (Fragment) OS=Sus scrofa GN=PGD PE=2 SV=3	0	99	NPGLQNLLLDDFFK			1632.85	817.432	1632.85	817.433	2	11
13	34.4	P14332	6PGD_PIG	6-phosphogluconate dehydrogenase, decarboxylating (Fragment) OS=Sus scrofa GN=PGD PE=2 SV=3	0	99	NPGLQNLLLDDFFK			1632.85	817.432	1632.85	817.433	2	13
13	34.4	P14332	6PGD_PIG	6-phosphogluconate dehydrogenase, decarboxylating (Fragment) OS=Sus scrofa GN=PGD PE=2 SV=3	0	99	NPGLQNLLLDDFFK			1632.85	817.432	1632.85	817.433	2	8
13	34.4	P14332	6PGD_PIG	6-phosphogluconate dehydrogenase, decarboxylating (Fragment) OS=Sus scrofa GN=PGD PE=2 SV=3	0	98.95	NPGLQNLLLDDFFK			1632.85	545.291	1632.85	545.291	3	6
13	34.4	P14332	6PGD_PIG	6-phosphogluconate dehydrogenase, decarboxylating (Fragment) OS=Sus scrofa GN=PGD PE=2 SV=3	0	98.15	NPGLQNLLLDDFFK			1632.85	817.432	1632.85	817.433	2	5
13	34.4	P14332	6PGD_PIG	6-phosphogluconate dehydrogenase, decarboxylating (Fragment) OS=Sus scrofa GN=PGD PE=2 SV=3	0	94.97	NPGLQNLLLDDFFK			1632.85	817.432	1632.85	817.433	2	6
13	34.4	P14332	6PGD_PIG	6-phosphogluconate dehydrogenase, decarboxylating (Fragment) OS=Sus scrofa GN=PGD PE=2 SV=3	0	95.27	SFLEDIR			878.449	440.232	878.45	440.232	2	7
13	34.4	P14332	6PGD_PIG	6-phosphogluconate dehydrogenase, decarboxylating (Fragment) OS=Sus scrofa GN=PGD PE=2 SV=3	0	94.89	SFLEDIR			878.449	440.232	878.45	440.232	2	6
13	34.4	P14332	6PGD_PIG	6-phosphogluconate dehydrogenase, decarboxylating (Fragment) OS=Sus scrofa GN=PGD PE=2 SV=3	0	67.29	SFLEDIR			878.452	440.233	878.45	440.232	2	6
13	34.4	P14332	6PGD_PIG	6-phosphogluconate dehydrogenase, decarboxylating (Fragment) OS=Sus scrofa GN=PGD PE=2 SV=3	0	99	WTAISALEYGVPVTLIGEAVFAR			2462.32	821.781	2462.32	821.781	3	8
13	34.4	P14332	6PGD_PIG	6-phosphogluconate dehydrogenase, decarboxylating (Fragment) OS=Sus scrofa GN=PGD PE=2 SV=3	0	81.08	WTAISALEYGVPVTLIGEAVFAR			2462.33	821.785	2462.32	821.781	3	7
28.14	43.71	P50447	A1AT_PIG	Alpha-1-antitrypsin OS=Sus scrofa GN=SERPINA1 PE=2 SV=1	2	99	AEAEIHEGFQHLLHTLNQPDNQLQLTTGNGLFIDEK			4070.02	815.012	4070.01	815.01	5	20
28.14	43.71	P50447	A1AT_PIG	Alpha-1-antitrypsin OS=Sus scrofa GN=SERPINA1 PE=2 SV=1	2	99	EGLQGHAVQETDVPR	Glu->pyro-Glu@N-term	cleaved A-E@N-term	1616.8	809.407	1616.79	809.403	2	20
28.14	43.71	P50447	A1AT_PIG	Alpha-1-antitrypsin OS=Sus scrofa GN=SERPINA1 PE=2 SV=1	2	99	FNKPFLFLIYDTK			1644.89	549.304	1644.89	549.304	3	13
28.14	43.71	P50447	A1AT_PIG	Alpha-1-antitrypsin OS=Sus scrofa GN=SERPINA1 PE=2 SV=1	2	99	IAPNLADFAF		cleaved F-S@C-term	1077.55	539.781	1077.55	539.782	2	11
28.14	43.71	P50447	A1AT_PIG	Alpha-1-antitrypsin OS=Sus scrofa GN=SERPINA1 PE=2 SV=1	2	99	IAPNLADFAFSLYR			1596.83	533.284	1596.83	533.284	3	12
28.14	43.71	P50447	A1AT_PIG	Alpha-1-antitrypsin OS=Sus scrofa GN=SERPINA1 PE=2 SV=1	2	99	IVDLVDELDKDTVFALVNY		cleaved Y-I@C-term; missed K-D@10	2180.13	727.716	2180.13	727.716	3	10
28.14	43.71	P50447	A1AT_PIG	Alpha-1-antitrypsin OS=Sus scrofa GN=SERPINA1 PE=2 SV=1	2	99	IVDLVDELDKDTVFALVNYIFFK		missed K-D@10	2715.44	906.155	2715.44	906.154	3	16
28.14	43.71	P50447	A1AT_PIG	Alpha-1-antitrypsin OS=Sus scrofa GN=SERPINA1 PE=2 SV=1	2	99	LTISGTYDLK			1109.6	555.806	1109.6	555.806	2	11
28.14	43.71	P50447	A1AT_PIG	Alpha-1-antitrypsin OS=Sus scrofa GN=SERPINA1 PE=2 SV=1	2	99	NLYHSEAF		cleaved F-S@C-term	979.439	490.727	979.44	490.727	2	8
28.14	43.71	P50447	A1AT_PIG	Alpha-1-antitrypsin OS=Sus scrofa GN=SERPINA1 PE=2 SV=1	2	99	NLYHSEAFSINFR			1596.77	533.263	1596.77	533.263	3	15
28.14	43.71	P50447	A1AT_PIG	Alpha-1-antitrypsin OS=Sus scrofa GN=SERPINA1 PE=2 SV=1	2	99	SIPPNVKFNKPFLFLIYDTKTKAVLFMGKVMNPTQK		cleaved M-S@N-term; missed K-F@7; missed K-T@20; missed K-A@22; missed K-V@29	4154.29	831.864	4154.28	831.864	5	8
28.14	43.71	P50447	A1AT_PIG	Alpha-1-antitrypsin OS=Sus scrofa GN=SERPINA1 PE=2 SV=1	2	99	VFSDEADLSGVTEEQPLK			1962.94	982.478	1962.94	982.478	2	11
28.14	43.71	P50447	A1AT_PIG	Alpha-1-antitrypsin OS=Sus scrofa GN=SERPINA1 PE=2 SV=1	2	99	YPSSANLHLPK			1225.65	409.556	1225.65	409.556	3	17
28.14	43.71	P50447	A1AT_PIG	Alpha-1-antitrypsin OS=Sus scrofa GN=SERPINA1 PE=2 SV=1	1.05552	97.11	AVLTIDEK			887.494	444.754	887.496	444.755	2	7
28.14	43.71	P50447	A1AT_PIG	Alpha-1-antitrypsin OS=Sus scrofa GN=SERPINA1 PE=2 SV=1	0.966576	99	LADFAFSLYR		cleaved N-L@N-term	1201.62	601.815	1201.61	601.814	2	11
28.14	43.71	P50447	A1AT_PIG	Alpha-1-antitrypsin OS=Sus scrofa GN=SERPINA1 PE=2 SV=1	0.120904	50.87	LHQLEDMLTK			1226.62	614.317	1226.63	614.324	2	9
28.14	43.71	P50447	A1AT_PIG	Alpha-1-antitrypsin OS=Sus scrofa GN=SERPINA1 PE=2 SV=1	0.000434512	38.67	AKFLEK	Acetyl@N-term	missed K-F@2	776.446	389.23	776.443	389.229	2	7
28.14	43.71	P50447	A1AT_PIG	Alpha-1-antitrypsin OS=Sus scrofa GN=SERPINA1 PE=2 SV=1	0	96.47	AEAEIHEGFQHLLHTLNQPDNQLQLTTGNGLFIDEK			4070.05	815.017	4070.01	815.01	5	8
28.14	43.71	P50447	A1AT_PIG	Alpha-1-antitrypsin OS=Sus scrofa GN=SERPINA1 PE=2 SV=1	0	52.67	AEAEIHEGFQHLLHTLNQPDNQLQLTTGNGLFIDEK	Amidated@C-term		4069.06	679.185	4069.03	679.179	6	9
28.14	43.71	P50447	A1AT_PIG	Alpha-1-antitrypsin OS=Sus scrofa GN=SERPINA1 PE=2 SV=1	0	93.71	AVLTIDEK			887.496	444.755	887.496	444.755	2	8
28.14	43.71	P50447	A1AT_PIG	Alpha-1-antitrypsin OS=Sus scrofa GN=SERPINA1 PE=2 SV=1	0	99	EGLQGHAVQETDVPR		cleaved A-E@N-term	1634.8	545.941	1634.8	545.941	3	18
28.14	43.71	P50447	A1AT_PIG	Alpha-1-antitrypsin OS=Sus scrofa GN=SERPINA1 PE=2 SV=1	0	99	EGLQGHAVQETDVPR		cleaved A-E@N-term	1634.8	545.941	1634.8	545.941	3	19
28.14	43.71	P50447	A1AT_PIG	Alpha-1-antitrypsin OS=Sus scrofa GN=SERPINA1 PE=2 SV=1	0	99	EGLQGHAVQETDVPR		cleaved A-E@N-term	1634.8	545.941	1634.8	545.941	3	16
28.14	43.71	P50447	A1AT_PIG	Alpha-1-antitrypsin OS=Sus scrofa GN=SERPINA1 PE=2 SV=1	0	99	EGLQGHAVQETDVPR		cleaved A-E@N-term	1634.8	818.408	1634.8	818.408	2	19
28.14	43.71	P50447	A1AT_PIG	Alpha-1-antitrypsin OS=Sus scrofa GN=SERPINA1 PE=2 SV=1	0	99	EGLQGHAVQETDVPR		cleaved A-E@N-term	1634.8	818.408	1634.8	818.408	2	16
28.14	43.71	P50447	A1AT_PIG	Alpha-1-antitrypsin OS=Sus scrofa GN=SERPINA1 PE=2 SV=1	0	99	EGLQGHAVQETDVPR		cleaved A-E@N-term	1634.8	818.408	1634.8	818.408	2	16
28.14	43.71	P50447	A1AT_PIG	Alpha-1-antitrypsin OS=Sus scrofa GN=SERPINA1 PE=2 SV=1	0	99	EGLQGHAVQETDVPR		cleaved A-E@N-term	1634.8	545.941	1634.8	545.941	3	15
28.14	43.71	P50447	A1AT_PIG	Alpha-1-antitrypsin OS=Sus scrofa GN=SERPINA1 PE=2 SV=1	0	99	EGLQGHAVQETDVPR		cleaved A-E@N-term	1634.8	818.409	1634.8	818.408	2	10
28.14	43.71	P50447	A1AT_PIG	Alpha-1-antitrypsin OS=Sus scrofa GN=SERPINA1 PE=2 SV=1	0	99	EGLQGHAVQETDVPR		cleaved A-E@N-term	1634.8	818.409	1634.8	818.408	2	13
28.14	43.71	P50447	A1AT_PIG	Alpha-1-antitrypsin OS=Sus scrofa GN=SERPINA1 PE=2 SV=1	0	99	EGLQGHAVQETDVPR		cleaved A-E@N-term	1634.8	545.942	1634.8	545.941	3	16
28.14	43.71	P50447	A1AT_PIG	Alpha-1-antitrypsin OS=Sus scrofa GN=SERPINA1 PE=2 SV=1	0	99	EGLQGHAVQETDVPR		cleaved A-E@N-term	1634.8	818.408	1634.8	818.408	2	14
28.14	43.71	P50447	A1AT_PIG	Alpha-1-antitrypsin OS=Sus scrofa GN=SERPINA1 PE=2 SV=1	0	99	EGLQGHAVQETDVPR	Glu->pyro-Glu@N-term	cleaved A-E@N-term	1616.8	809.406	1616.79	809.403	2	11
28.14	43.71	P50447	A1AT_PIG	Alpha-1-antitrypsin OS=Sus scrofa GN=SERPINA1 PE=2 SV=1	0	99	EGLQGHAVQETDVPR		cleaved A-E@N-term	1634.8	545.942	1634.8	545.941	3	19
28.14	43.71	P50447	A1AT_PIG	Alpha-1-antitrypsin OS=Sus scrofa GN=SERPINA1 PE=2 SV=1	0	93.37	EGLQGHAVQETDVPR		cleaved A-E@N-term	1634.8	818.408	1634.8	818.408	2	8
28.14	43.71	P50447	A1AT_PIG	Alpha-1-antitrypsin OS=Sus scrofa GN=SERPINA1 PE=2 SV=1	0	67.78	EGLQGHAVQETDVPR		cleaved A-E@N-term	1634.8	818.408	1634.8	818.408	2	6
28.14	43.71	P50447	A1AT_PIG	Alpha-1-antitrypsin OS=Sus scrofa GN=SERPINA1 PE=2 SV=1	0	99	FNKPFLFLIYDTK			1644.89	549.304	1644.89	549.304	3	11
28.14	43.71	P50447	A1AT_PIG	Alpha-1-antitrypsin OS=Sus scrofa GN=SERPINA1 PE=2 SV=1	0	99	FNKPFLFLIYDTK			1644.89	823.452	1644.89	823.453	2	19
28.14	43.71	P50447	A1AT_PIG	Alpha-1-antitrypsin OS=Sus scrofa GN=SERPINA1 PE=2 SV=1	0	99	FNKPFLFLIYDTK			1644.89	549.305	1644.89	549.304	3	11
28.14	43.71	P50447	A1AT_PIG	Alpha-1-antitrypsin OS=Sus scrofa GN=SERPINA1 PE=2 SV=1	0	99	FNKPFLFLIYDTK			1644.9	823.458	1644.89	823.453	2	11
28.14	43.71	P50447	A1AT_PIG	Alpha-1-antitrypsin OS=Sus scrofa GN=SERPINA1 PE=2 SV=1	0	99	FNKPFLFLIYDTK			1644.89	549.305	1644.89	549.304	3	10
28.14	43.71	P50447	A1AT_PIG	Alpha-1-antitrypsin OS=Sus scrofa GN=SERPINA1 PE=2 SV=1	0	99	FNKPFLFLIYDTK			1644.89	823.453	1644.89	823.453	2	10
28.14	43.71	P50447	A1AT_PIG	Alpha-1-antitrypsin OS=Sus scrofa GN=SERPINA1 PE=2 SV=1	0	28.08	FNKPFLFLIYDTK			1644.89	823.452	1644.89	823.453	2	5
28.14	43.71	P50447	A1AT_PIG	Alpha-1-antitrypsin OS=Sus scrofa GN=SERPINA1 PE=2 SV=1	0	99	IAPNLADFAF		cleaved F-S@C-term	1077.55	539.783	1077.55	539.782	2	6
28.14	43.71	P50447	A1AT_PIG	Alpha-1-antitrypsin OS=Sus scrofa GN=SERPINA1 PE=2 SV=1	0	99	IAPNLADFAF		cleaved F-S@C-term	1077.55	539.783	1077.55	539.782	2	10
28.14	43.71	P50447	A1AT_PIG	Alpha-1-antitrypsin OS=Sus scrofa GN=SERPINA1 PE=2 SV=1	0	99	IAPNLADFAF		cleaved F-S@C-term	1077.55	539.783	1077.55	539.782	2	7
28.14	43.71	P50447	A1AT_PIG	Alpha-1-antitrypsin OS=Sus scrofa GN=SERPINA1 PE=2 SV=1	0	99	IAPNLADFAF		cleaved F-S@C-term	1077.55	539.782	1077.55	539.782	2	10
28.14	43.71	P50447	A1AT_PIG	Alpha-1-antitrypsin OS=Sus scrofa GN=SERPINA1 PE=2 SV=1	0	97.14	IAPNLADFAF		cleaved F-S@C-term	1077.55	539.781	1077.55	539.782	2	7
28.14	43.71	P50447	A1AT_PIG	Alpha-1-antitrypsin OS=Sus scrofa GN=SERPINA1 PE=2 SV=1	0	86.77	IAPNLADFAF		cleaved F-S@C-term	1077.55	539.782	1077.55	539.782	2	6
28.14	43.71	P50447	A1AT_PIG	Alpha-1-antitrypsin OS=Sus scrofa GN=SERPINA1 PE=2 SV=1	0	76.5	IAPNLADFAF		cleaved F-S@C-term	1077.55	539.782	1077.55	539.782	2	5
28.14	43.71	P50447	A1AT_PIG	Alpha-1-antitrypsin OS=Sus scrofa GN=SERPINA1 PE=2 SV=1	0	30.83	IAPNLADFAF		cleaved F-S@C-term	1077.55	539.784	1077.55	539.782	2	5
28.14	43.71	P50447	A1AT_PIG	Alpha-1-antitrypsin OS=Sus scrofa GN=SERPINA1 PE=2 SV=1	0	99	IAPNLADFAFSLYR			1596.84	799.425	1596.83	799.422	2	9
28.14	43.71	P50447	A1AT_PIG	Alpha-1-antitrypsin OS=Sus scrofa GN=SERPINA1 PE=2 SV=1	0	99	IAPNLADFAFSLYR			1596.83	799.421	1596.83	799.422	2	12
28.14	43.71	P50447	A1AT_PIG	Alpha-1-antitrypsin OS=Sus scrofa GN=SERPINA1 PE=2 SV=1	0	99	IAPNLADFAFSLYR			1596.83	799.422	1596.83	799.422	2	10
28.14	43.71	P50447	A1AT_PIG	Alpha-1-antitrypsin OS=Sus scrofa GN=SERPINA1 PE=2 SV=1	0	99	IAPNLADFAFSLYR			1596.83	799.422	1596.83	799.422	2	9
28.14	43.71	P50447	A1AT_PIG	Alpha-1-antitrypsin OS=Sus scrofa GN=SERPINA1 PE=2 SV=1	0	99	IAPNLADFAFSLYR			1596.83	799.422	1596.83	799.422	2	8
28.14	43.71	P50447	A1AT_PIG	Alpha-1-antitrypsin OS=Sus scrofa GN=SERPINA1 PE=2 SV=1	0	99	IAPNLADFAFSLYR			1596.83	799.422	1596.83	799.422	2	9
28.14	43.71	P50447	A1AT_PIG	Alpha-1-antitrypsin OS=Sus scrofa GN=SERPINA1 PE=2 SV=1	0	86.81	IAPNLADFAFSLYR			1596.83	799.422	1596.83	799.422	2	7
28.14	43.71	P50447	A1AT_PIG	Alpha-1-antitrypsin OS=Sus scrofa GN=SERPINA1 PE=2 SV=1	0	99	IVDLVDELDKDTVFALVNY		cleaved Y-I@C-term; missed K-D@10	2180.18	727.733	2180.13	727.716	3	13
28.14	43.71	P50447	A1AT_PIG	Alpha-1-antitrypsin OS=Sus scrofa GN=SERPINA1 PE=2 SV=1	0	99	IVDLVDELDKDTVFALVNY		cleaved Y-I@C-term; missed K-D@10	2180.13	727.716	2180.13	727.716	3	5
28.14	43.71	P50447	A1AT_PIG	Alpha-1-antitrypsin OS=Sus scrofa GN=SERPINA1 PE=2 SV=1	0	99	IVDLVDELDKDTVFALVNY		cleaved Y-I@C-term; missed K-D@10	2180.13	1091.07	2180.13	1091.07	2	5
28.14	43.71	P50447	A1AT_PIG	Alpha-1-antitrypsin OS=Sus scrofa GN=SERPINA1 PE=2 SV=1	0	99	IVDLVDELDKDTVFALVNY		cleaved Y-I@C-term; missed K-D@10	2180.13	1091.07	2180.13	1091.07	2	7
28.14	43.71	P50447	A1AT_PIG	Alpha-1-antitrypsin OS=Sus scrofa GN=SERPINA1 PE=2 SV=1	0	99	IVDLVDELDKDTVFALVNY		cleaved Y-I@C-term; missed K-D@10	2180.12	727.715	2180.13	727.716	3	8
28.14	43.71	P50447	A1AT_PIG	Alpha-1-antitrypsin OS=Sus scrofa GN=SERPINA1 PE=2 SV=1	0	99	IVDLVDELDKDTVFALVNYIFFK		missed K-D@10	2715.55	906.192	2715.44	906.154	3	18
28.14	43.71	P50447	A1AT_PIG	Alpha-1-antitrypsin OS=Sus scrofa GN=SERPINA1 PE=2 SV=1	0	99	IVDLVDELDKDTVFALVNYIFFK		missed K-D@10	2715.55	906.192	2715.44	906.154	3	8
28.14	43.71	P50447	A1AT_PIG	Alpha-1-antitrypsin OS=Sus scrofa GN=SERPINA1 PE=2 SV=1	0	46.31	LADFAF		cleaved N-L@N-term; cleaved F-S@C-term	682.326	683.333	682.333	683.34	1	7
28.14	43.71	P50447	A1AT_PIG	Alpha-1-antitrypsin OS=Sus scrofa GN=SERPINA1 PE=2 SV=1	0	97.18	LADFAFSLYR		cleaved N-L@N-term	1201.62	601.815	1201.61	601.814	2	10
28.14	43.71	P50447	A1AT_PIG	Alpha-1-antitrypsin OS=Sus scrofa GN=SERPINA1 PE=2 SV=1	0	84.41	LADFAFSLYR		cleaved N-L@N-term	1202.62	602.317	1201.61	601.814	2	11
28.14	43.71	P50447	A1AT_PIG	Alpha-1-antitrypsin OS=Sus scrofa GN=SERPINA1 PE=2 SV=1	0	78.85	LADFAFSLYR		cleaved N-L@N-term	1201.62	601.815	1201.61	601.814	2	6
28.14	43.71	P50447	A1AT_PIG	Alpha-1-antitrypsin OS=Sus scrofa GN=SERPINA1 PE=2 SV=1	0	63.43	LADFAFSLYR		cleaved N-L@N-term	1201.62	601.815	1201.61	601.814	2	6
28.14	43.71	P50447	A1AT_PIG	Alpha-1-antitrypsin OS=Sus scrofa GN=SERPINA1 PE=2 SV=1	0	90.37	LTISGTYDLK			1109.6	555.806	1109.6	555.806	2	9
28.14	43.71	P50447	A1AT_PIG	Alpha-1-antitrypsin OS=Sus scrofa GN=SERPINA1 PE=2 SV=1	0	81.32	LTISGTYDLK			1109.59	555.804	1109.6	555.806	2	9
28.14	43.71	P50447	A1AT_PIG	Alpha-1-antitrypsin OS=Sus scrofa GN=SERPINA1 PE=2 SV=1	0	78.61	LTISGTYDLK			1109.6	555.806	1109.6	555.806	2	10
28.14	43.71	P50447	A1AT_PIG	Alpha-1-antitrypsin OS=Sus scrofa GN=SERPINA1 PE=2 SV=1	0	75.5	LTISGTYDLK			1109.6	555.806	1109.6	555.806	2	7
28.14	43.71	P50447	A1AT_PIG	Alpha-1-antitrypsin OS=Sus scrofa GN=SERPINA1 PE=2 SV=1	0	75.4	LTISGTYDLK			1109.59	555.804	1109.6	555.806	2	7
28.14	43.71	P50447	A1AT_PIG	Alpha-1-antitrypsin OS=Sus scrofa GN=SERPINA1 PE=2 SV=1	0	17.34	LTISGTYDLK			1109.59	555.802	1109.6	555.806	2	7
28.14	43.71	P50447	A1AT_PIG	Alpha-1-antitrypsin OS=Sus scrofa GN=SERPINA1 PE=2 SV=1	0	93.42	NLYHSEAF		cleaved F-S@C-term	979.441	490.728	979.44	490.727	2	9
28.14	43.71	P50447	A1AT_PIG	Alpha-1-antitrypsin OS=Sus scrofa GN=SERPINA1 PE=2 SV=1	0	99	NLYHSEAFSINFR			1596.77	533.264	1596.77	533.263	3	17
28.14	43.71	P50447	A1AT_PIG	Alpha-1-antitrypsin OS=Sus scrofa GN=SERPINA1 PE=2 SV=1	0	99	NLYHSEAFSINFR			1596.77	799.391	1596.77	799.392	2	16
28.14	43.71	P50447	A1AT_PIG	Alpha-1-antitrypsin OS=Sus scrofa GN=SERPINA1 PE=2 SV=1	0	99	NLYHSEAFSINFR			1596.77	799.391	1596.77	799.392	2	13
28.14	43.71	P50447	A1AT_PIG	Alpha-1-antitrypsin OS=Sus scrofa GN=SERPINA1 PE=2 SV=1	0	99	NLYHSEAFSINFR			1596.79	799.402	1596.77	799.392	2	10
28.14	43.71	P50447	A1AT_PIG	Alpha-1-antitrypsin OS=Sus scrofa GN=SERPINA1 PE=2 SV=1	0	97.71	NLYHSEAFSINFR			1596.77	799.391	1596.77	799.392	2	7
28.14	43.71	P50447	A1AT_PIG	Alpha-1-antitrypsin OS=Sus scrofa GN=SERPINA1 PE=2 SV=1	0	90.15	NLYHSEAFSINFR			1596.77	799.391	1596.77	799.392	2	6
28.14	43.71	P50447	A1AT_PIG	Alpha-1-antitrypsin OS=Sus scrofa GN=SERPINA1 PE=2 SV=1	0	38.41	PFLFLIYDTKTKAVLFMGK	Formyl(K)@19	cleaved K-P@N-term; missed K-T@10; missed K-A@12	2259.24	754.088	2259.24	754.087	3	7
28.14	43.71	P50447	A1AT_PIG	Alpha-1-antitrypsin OS=Sus scrofa GN=SERPINA1 PE=2 SV=1	0	47.38	SIPPNVKFNKPFLFLIYDTKTKAVLFMGKVMNPTQK		cleaved M-S@N-term; missed K-F@7; missed K-T@20; missed K-A@22; missed K-V@29	4154.29	693.389	4154.28	693.388	6	8
28.14	43.71	P50447	A1AT_PIG	Alpha-1-antitrypsin OS=Sus scrofa GN=SERPINA1 PE=2 SV=1	0	44.26	SIPPNVKFNKPFLFLIYDTKTKAVLFMGKVMNPTQK		cleaved M-S@N-term; missed K-F@7; missed K-T@20; missed K-A@22; missed K-V@29	4154.28	693.388	4154.28	693.388	6	5
28.14	43.71	P50447	A1AT_PIG	Alpha-1-antitrypsin OS=Sus scrofa GN=SERPINA1 PE=2 SV=1	0	34.73	SIPPNVKFNKPFLFLIYDTKTKAVLFMGKVMNPTQK		cleaved M-S@N-term; missed K-F@7; missed K-T@20; missed K-A@22; missed K-V@29	4154.28	693.388	4154.28	693.388	6	7
28.14	43.71	P50447	A1AT_PIG	Alpha-1-antitrypsin OS=Sus scrofa GN=SERPINA1 PE=2 SV=1	0	99	VFSDEADLSGVTEEQPLK			1962.94	982.478	1962.94	982.478	2	22
28.14	43.71	P50447	A1AT_PIG	Alpha-1-antitrypsin OS=Sus scrofa GN=SERPINA1 PE=2 SV=1	0	99	VFSDEADLSGVTEEQPLK			1962.94	982.478	1962.94	982.478	2	18
28.14	43.71	P50447	A1AT_PIG	Alpha-1-antitrypsin OS=Sus scrofa GN=SERPINA1 PE=2 SV=1	0	99	VFSDEADLSGVTEEQPLK			1962.94	982.477	1962.94	982.478	2	18
28.14	43.71	P50447	A1AT_PIG	Alpha-1-antitrypsin OS=Sus scrofa GN=SERPINA1 PE=2 SV=1	0	99	VFSDEADLSGVTEEQPLK			1962.94	982.479	1962.94	982.478	2	19
28.14	43.71	P50447	A1AT_PIG	Alpha-1-antitrypsin OS=Sus scrofa GN=SERPINA1 PE=2 SV=1	0	99	VFSDEADLSGVTEEQPLK			1962.94	655.321	1962.94	655.321	3	12
28.14	43.71	P50447	A1AT_PIG	Alpha-1-antitrypsin OS=Sus scrofa GN=SERPINA1 PE=2 SV=1	0	99	VFSDEADLSGVTEEQPLK			1962.94	982.479	1962.94	982.478	2	17
28.14	43.71	P50447	A1AT_PIG	Alpha-1-antitrypsin OS=Sus scrofa GN=SERPINA1 PE=2 SV=1	0	99	VFSDEADLSGVTEEQPLK			1962.94	982.48	1962.94	982.478	2	12
28.14	43.71	P50447	A1AT_PIG	Alpha-1-antitrypsin OS=Sus scrofa GN=SERPINA1 PE=2 SV=1	0	99	VFSDEADLSGVTEEQPLK			1962.94	982.479	1962.94	982.478	2	13
28.14	43.71	P50447	A1AT_PIG	Alpha-1-antitrypsin OS=Sus scrofa GN=SERPINA1 PE=2 SV=1	0	99	VFSDEADLSGVTEEQPLK			1962.94	655.321	1962.94	655.321	3	10
28.14	43.71	P50447	A1AT_PIG	Alpha-1-antitrypsin OS=Sus scrofa GN=SERPINA1 PE=2 SV=1	0	99	VFSDEADLSGVTEEQPLK			1962.94	655.321	1962.94	655.321	3	8
28.14	43.71	P50447	A1AT_PIG	Alpha-1-antitrypsin OS=Sus scrofa GN=SERPINA1 PE=2 SV=1	0	62.51	VFSDEADLSGVTEEQPLK			1962.94	655.32	1962.94	655.321	3	6
28.14	43.71	P50447	A1AT_PIG	Alpha-1-antitrypsin OS=Sus scrofa GN=SERPINA1 PE=2 SV=1	0	36.46	VFSDEADLSGVTEEQPLK			1962.94	655.32	1962.94	655.321	3	5
28.14	43.71	P50447	A1AT_PIG	Alpha-1-antitrypsin OS=Sus scrofa GN=SERPINA1 PE=2 SV=1	0	99	YPSSANLHLPK			1225.65	409.556	1225.65	409.556	3	14
28.14	43.71	P50447	A1AT_PIG	Alpha-1-antitrypsin OS=Sus scrofa GN=SERPINA1 PE=2 SV=1	0	99	YPSSANLHLPK			1225.65	409.556	1225.65	409.556	3	15
28.14	43.71	P50447	A1AT_PIG	Alpha-1-antitrypsin OS=Sus scrofa GN=SERPINA1 PE=2 SV=1	0	99	YPSSANLHLPK			1225.65	409.556	1225.65	409.556	3	12
28.14	43.71	P50447	A1AT_PIG	Alpha-1-antitrypsin OS=Sus scrofa GN=SERPINA1 PE=2 SV=1	0	99	YPSSANLHLPK			1225.65	409.556	1225.65	409.556	3	15
28.14	43.71	P50447	A1AT_PIG	Alpha-1-antitrypsin OS=Sus scrofa GN=SERPINA1 PE=2 SV=1	0	99	YPSSANLHLPK			1225.65	613.832	1225.65	613.83	2	10
28.14	43.71	P50447	A1AT_PIG	Alpha-1-antitrypsin OS=Sus scrofa GN=SERPINA1 PE=2 SV=1	0	25.06	YPSSANLHLPK			1225.65	613.832	1225.65	613.83	2	7
23.04	45.04	P00503	AATC_PIG	Aspartate aminotransferase, cytoplasmic OS=Sus scrofa GN=GOT1 PE=1 SV=3	2	99	APPSVFAEVPQAQPVLVFK		cleaved M-A@N-term	2023.11	1012.56	2023.11	1012.56	2	17
23.04	45.04	P00503	AATC_PIG	Aspartate aminotransferase, cytoplasmic OS=Sus scrofa GN=GOT1 PE=1 SV=3	2	99	FLFPFFDSAYQGFASGNLEK			2284.09	762.369	2284.08	762.369	3	13
23.04	45.04	P00503	AATC_PIG	Aspartate aminotransferase, cytoplasmic OS=Sus scrofa GN=GOT1 PE=1 SV=3	2	99	IANDSSLNHEYLPILGLAEFR			2371.21	791.412	2371.22	791.413	3	13
23.04	45.04	P00503	AATC_PIG	Aspartate aminotransferase, cytoplasmic OS=Sus scrofa GN=GOT1 PE=1 SV=3	2	99	LALGDDSPALQEK			1355.69	678.853	1355.69	678.854	2	12
23.04	45.04	P00503	AATC_PIG	Aspartate aminotransferase, cytoplasmic OS=Sus scrofa GN=GOT1 PE=1 SV=3	2	99	NLDYVATSIHEAVTK			1659.85	554.29	1659.85	554.29	3	16
23.04	45.04	P00503	AATC_PIG	Aspartate aminotransferase, cytoplasmic OS=Sus scrofa GN=GOT1 PE=1 SV=3	2	99	TLSDPELFHEWTGNVK			1871.91	624.976	1871.91	624.976	3	16
23.04	45.04	P00503	AATC_PIG	Aspartate aminotransferase, cytoplasmic OS=Sus scrofa GN=GOT1 PE=1 SV=3	2	99	VGGVQSLGGTGALR			1270.7	636.356	1270.7	636.357	2	18
23.04	45.04	P00503	AATC_PIG	Aspartate aminotransferase, cytoplasmic OS=Sus scrofa GN=GOT1 PE=1 SV=3	2	99	VTWSNPPAQGAR			1282.64	642.328	1282.64	642.328	2	12
23.04	45.04	P00503	AATC_PIG	Aspartate aminotransferase, cytoplasmic OS=Sus scrofa GN=GOT1 PE=1 SV=3	1.95861	99	DTPVYVSSPTWENHNGVFTTAGFK			2653.25	885.424	2653.24	885.422	3	10
23.04	45.04	P00503	AATC_PIG	Aspartate aminotransferase, cytoplasmic OS=Sus scrofa GN=GOT1 PE=1 SV=3	1.92082	99	VNLGVGAYR			947.518	474.767	947.519	474.767	2	9
23.04	45.04	P00503	AATC_PIG	Aspartate aminotransferase, cytoplasmic OS=Sus scrofa GN=GOT1 PE=1 SV=3	1.61979	99	AHNPTGTDPTPEQWK		cleaved C-A@N-term	1677.77	560.265	1677.77	560.266	3	13
23.04	45.04	P00503	AATC_PIG	Aspartate aminotransferase, cytoplasmic OS=Sus scrofa GN=GOT1 PE=1 SV=3	1.22915	98.44	IGAEFLAR			875.486	438.75	875.487	438.751	2	10
23.04	45.04	P00503	AATC_PIG	Aspartate aminotransferase, cytoplasmic OS=Sus scrofa GN=GOT1 PE=1 SV=3	0.250264	75.62	HIYLLPSGR			1054.59	528.304	1054.59	528.303	2	7
23.04	45.04	P00503	AATC_PIG	Aspartate aminotransferase, cytoplasmic OS=Sus scrofa GN=GOT1 PE=1 SV=3	0.0589858	81.98	TGLNPKQVEYLINEKH		cleaved F-T@N-term; cleaved H-I@C-term; missed K-Q@6; missed K-H@15	1882	628.341	1881.99	628.339	3	6
23.04	45.04	P00503	AATC_PIG	Aspartate aminotransferase, cytoplasmic OS=Sus scrofa GN=GOT1 PE=1 SV=3	0	99	AHNPTGTDPTPEQWK		cleaved C-A@N-term	1677.77	560.265	1677.77	560.266	3	15
23.04	45.04	P00503	AATC_PIG	Aspartate aminotransferase, cytoplasmic OS=Sus scrofa GN=GOT1 PE=1 SV=3	0	93.78	AHNPTGTDPTPEQWK		cleaved C-A@N-term	1677.77	560.265	1677.77	560.266	3	12
23.04	45.04	P00503	AATC_PIG	Aspartate aminotransferase, cytoplasmic OS=Sus scrofa GN=GOT1 PE=1 SV=3	0	99	APPSVFAEVPQAQPVLVFK		cleaved M-A@N-term	2023.11	1012.56	2023.11	1012.56	2	17
23.04	45.04	P00503	AATC_PIG	Aspartate aminotransferase, cytoplasmic OS=Sus scrofa GN=GOT1 PE=1 SV=3	0	99	APPSVFAEVPQAQPVLVFK		cleaved M-A@N-term	2023.11	1012.56	2023.11	1012.56	2	15
23.04	45.04	P00503	AATC_PIG	Aspartate aminotransferase, cytoplasmic OS=Sus scrofa GN=GOT1 PE=1 SV=3	0	99	APPSVFAEVPQAQPVLVFK		cleaved M-A@N-term	2023.12	1012.57	2023.11	1012.56	2	8
23.04	45.04	P00503	AATC_PIG	Aspartate aminotransferase, cytoplasmic OS=Sus scrofa GN=GOT1 PE=1 SV=3	0	99	APPSVFAEVPQAQPVLVFK		cleaved M-A@N-term	2023.12	1012.57	2023.11	1012.56	2	11
23.04	45.04	P00503	AATC_PIG	Aspartate aminotransferase, cytoplasmic OS=Sus scrofa GN=GOT1 PE=1 SV=3	0	99	APPSVFAEVPQAQPVLVFK		cleaved M-A@N-term	2023.12	675.379	2023.11	675.379	3	9
23.04	45.04	P00503	AATC_PIG	Aspartate aminotransferase, cytoplasmic OS=Sus scrofa GN=GOT1 PE=1 SV=3	0	99	APPSVFAEVPQAQPVLVFK		cleaved M-A@N-term	2023.11	1012.56	2023.11	1012.56	2	12
23.04	45.04	P00503	AATC_PIG	Aspartate aminotransferase, cytoplasmic OS=Sus scrofa GN=GOT1 PE=1 SV=3	0	99	APPSVFAEVPQAQPVLVFK		cleaved M-A@N-term	2023.11	675.379	2023.11	675.379	3	9
23.04	45.04	P00503	AATC_PIG	Aspartate aminotransferase, cytoplasmic OS=Sus scrofa GN=GOT1 PE=1 SV=3	0	98.66	APPSVFAEVPQAQPVLVFK		cleaved M-A@N-term	2023.11	1012.56	2023.11	1012.56	2	7
23.04	45.04	P00503	AATC_PIG	Aspartate aminotransferase, cytoplasmic OS=Sus scrofa GN=GOT1 PE=1 SV=3	0	95.47	APPSVFAEVPQAQPVLVFK		cleaved M-A@N-term	2023.11	1012.56	2023.11	1012.56	2	9
23.04	45.04	P00503	AATC_PIG	Aspartate aminotransferase, cytoplasmic OS=Sus scrofa GN=GOT1 PE=1 SV=3	0	99	DTPVYVSSPTWENHNGVFTTAGFK			2653.25	885.424	2653.24	885.422	3	9
23.04	45.04	P00503	AATC_PIG	Aspartate aminotransferase, cytoplasmic OS=Sus scrofa GN=GOT1 PE=1 SV=3	0	99	FLFPFFDSAYQGFASGNLEK			2284.08	1143.05	2284.08	1143.05	2	8
23.04	45.04	P00503	AATC_PIG	Aspartate aminotransferase, cytoplasmic OS=Sus scrofa GN=GOT1 PE=1 SV=3	0	99	FLFPFFDSAYQGFASGNLEK			2284.08	762.368	2284.08	762.369	3	10
23.04	45.04	P00503	AATC_PIG	Aspartate aminotransferase, cytoplasmic OS=Sus scrofa GN=GOT1 PE=1 SV=3	0	99	FLFPFFDSAYQGFASGNLEK			2284.09	762.369	2284.08	762.369	3	14
23.04	45.04	P00503	AATC_PIG	Aspartate aminotransferase, cytoplasmic OS=Sus scrofa GN=GOT1 PE=1 SV=3	0	99	FLFPFFDSAYQGFASGNLEK			2284.09	762.369	2284.08	762.369	3	6
23.04	45.04	P00503	AATC_PIG	Aspartate aminotransferase, cytoplasmic OS=Sus scrofa GN=GOT1 PE=1 SV=3	0	99	FLFPFFDSAYQGFASGNLEK			2284.09	762.37	2284.08	762.369	3	10
23.04	45.04	P00503	AATC_PIG	Aspartate aminotransferase, cytoplasmic OS=Sus scrofa GN=GOT1 PE=1 SV=3	0	99	FLFPFFDSAYQGFASGNLEK			2284.08	1143.05	2284.08	1143.05	2	6
23.04	45.04	P00503	AATC_PIG	Aspartate aminotransferase, cytoplasmic OS=Sus scrofa GN=GOT1 PE=1 SV=3	0	99	FLFPFFDSAYQGFASGNLEK			2284.09	1143.05	2284.08	1143.05	2	8
23.04	45.04	P00503	AATC_PIG	Aspartate aminotransferase, cytoplasmic OS=Sus scrofa GN=GOT1 PE=1 SV=3	0	99	FLFPFFDSAYQGFASGNLEK			2284.09	762.369	2284.08	762.369	3	8
23.04	45.04	P00503	AATC_PIG	Aspartate aminotransferase, cytoplasmic OS=Sus scrofa GN=GOT1 PE=1 SV=3	0	99	FLFPFFDSAYQGFASGNLEK			2284.08	1143.05	2284.08	1143.05	2	6
23.04	45.04	P00503	AATC_PIG	Aspartate aminotransferase, cytoplasmic OS=Sus scrofa GN=GOT1 PE=1 SV=3	0	98.59	FLFPFFDSAYQGFASGNLEK			2284.09	762.37	2284.08	762.369	3	5
23.04	45.04	P00503	AATC_PIG	Aspartate aminotransferase, cytoplasmic OS=Sus scrofa GN=GOT1 PE=1 SV=3	0	99	IANDSSLNHEYLPILGLAEFR			2371.21	791.412	2371.22	791.413	3	10
23.04	45.04	P00503	AATC_PIG	Aspartate aminotransferase, cytoplasmic OS=Sus scrofa GN=GOT1 PE=1 SV=3	0	99	IANDSSLNHEYLPILGLAEFR			2371.22	791.414	2371.22	791.413	3	12
23.04	45.04	P00503	AATC_PIG	Aspartate aminotransferase, cytoplasmic OS=Sus scrofa GN=GOT1 PE=1 SV=3	0	99	IANDSSLNHEYLPILGLAEFR			2371.22	791.414	2371.22	791.413	3	7
23.04	45.04	P00503	AATC_PIG	Aspartate aminotransferase, cytoplasmic OS=Sus scrofa GN=GOT1 PE=1 SV=3	0	99	IANDSSLNHEYLPILGLAEFR			2371.21	791.412	2371.22	791.413	3	11
23.04	45.04	P00503	AATC_PIG	Aspartate aminotransferase, cytoplasmic OS=Sus scrofa GN=GOT1 PE=1 SV=3	0	99	IANDSSLNHEYLPILGLAEFR			2371.22	791.412	2371.22	791.413	3	14
23.04	45.04	P00503	AATC_PIG	Aspartate aminotransferase, cytoplasmic OS=Sus scrofa GN=GOT1 PE=1 SV=3	0	99	IANDSSLNHEYLPILGLAEFR			2371.21	791.411	2371.22	791.413	3	9
23.04	45.04	P00503	AATC_PIG	Aspartate aminotransferase, cytoplasmic OS=Sus scrofa GN=GOT1 PE=1 SV=3	0	16.06	IANDSSLNHEYLPILGLAEFR	Deamidated(N)@8		2372.18	791.734	2372.2	791.741	3	5
23.04	45.04	P00503	AATC_PIG	Aspartate aminotransferase, cytoplasmic OS=Sus scrofa GN=GOT1 PE=1 SV=3	0	99	LALGDDSPALQEK			1355.69	678.854	1355.69	678.854	2	18
23.04	45.04	P00503	AATC_PIG	Aspartate aminotransferase, cytoplasmic OS=Sus scrofa GN=GOT1 PE=1 SV=3	0	99	LALGDDSPALQEK			1355.69	678.852	1355.69	678.854	2	10
23.04	45.04	P00503	AATC_PIG	Aspartate aminotransferase, cytoplasmic OS=Sus scrofa GN=GOT1 PE=1 SV=3	0	25.73	LIADFR	Carboxymethyl(D)@4		791.419	396.717	791.418	396.716	2	5
23.04	45.04	P00503	AATC_PIG	Aspartate aminotransferase, cytoplasmic OS=Sus scrofa GN=GOT1 PE=1 SV=3	0	99	NLDYVATSIHEAVTK			1659.85	554.289	1659.85	554.29	3	14
23.04	45.04	P00503	AATC_PIG	Aspartate aminotransferase, cytoplasmic OS=Sus scrofa GN=GOT1 PE=1 SV=3	0	99	NLDYVATSIHEAVTK			1659.85	830.93	1659.85	830.931	2	10
23.04	45.04	P00503	AATC_PIG	Aspartate aminotransferase, cytoplasmic OS=Sus scrofa GN=GOT1 PE=1 SV=3	0	99	NLDYVATSIHEAVTK			1659.85	554.29	1659.85	554.29	3	10
23.04	45.04	P00503	AATC_PIG	Aspartate aminotransferase, cytoplasmic OS=Sus scrofa GN=GOT1 PE=1 SV=3	0	98.36	NLDYVATSIHEAVTK			1659.85	554.29	1659.85	554.29	3	9
23.04	45.04	P00503	AATC_PIG	Aspartate aminotransferase, cytoplasmic OS=Sus scrofa GN=GOT1 PE=1 SV=3	0	92.43	NLDYVATSIHEAVTK			1659.85	830.932	1659.85	830.931	2	8
23.04	45.04	P00503	AATC_PIG	Aspartate aminotransferase, cytoplasmic OS=Sus scrofa GN=GOT1 PE=1 SV=3	0	53.45	NLDYVATSIHEAVTK			1659.85	554.29	1659.85	554.29	3	6
23.04	45.04	P00503	AATC_PIG	Aspartate aminotransferase, cytoplasmic OS=Sus scrofa GN=GOT1 PE=1 SV=3	0	40.35	TGLNPKQVEYLINEKH		cleaved F-T@N-term; cleaved H-I@C-term; missed K-Q@6; missed K-H@15	1882	628.341	1881.99	628.339	3	7
23.04	45.04	P00503	AATC_PIG	Aspartate aminotransferase, cytoplasmic OS=Sus scrofa GN=GOT1 PE=1 SV=3	0	39.07	TGLNPKQVEYLINEKH		cleaved F-T@N-term; cleaved H-I@C-term; missed K-Q@6; missed K-H@15	1882	628.34	1881.99	628.339	3	6
23.04	45.04	P00503	AATC_PIG	Aspartate aminotransferase, cytoplasmic OS=Sus scrofa GN=GOT1 PE=1 SV=3	0	32.06	TGLNPKQVEYLINEKH		cleaved F-T@N-term; cleaved H-I@C-term; missed K-Q@6; missed K-H@15	1882	628.341	1881.99	628.339	3	6
23.04	45.04	P00503	AATC_PIG	Aspartate aminotransferase, cytoplasmic OS=Sus scrofa GN=GOT1 PE=1 SV=3	0	25.86	TGLNPKQVEYLINEKH		cleaved F-T@N-term; cleaved H-I@C-term; missed K-Q@6; missed K-H@15	1882	628.341	1881.99	628.339	3	4
23.04	45.04	P00503	AATC_PIG	Aspartate aminotransferase, cytoplasmic OS=Sus scrofa GN=GOT1 PE=1 SV=3	0	25.56	TGLNPKQVEYLINEKH		cleaved F-T@N-term; cleaved H-I@C-term; missed K-Q@6; missed K-H@15	1882	628.341	1881.99	628.339	3	6
23.04	45.04	P00503	AATC_PIG	Aspartate aminotransferase, cytoplasmic OS=Sus scrofa GN=GOT1 PE=1 SV=3	0	99	TLSDPELFHEWTGNVK			1871.91	936.963	1871.91	936.96	2	13
23.04	45.04	P00503	AATC_PIG	Aspartate aminotransferase, cytoplasmic OS=Sus scrofa GN=GOT1 PE=1 SV=3	0	99	TLSDPELFHEWTGNVK			1871.9	936.959	1871.91	936.96	2	11
23.04	45.04	P00503	AATC_PIG	Aspartate aminotransferase, cytoplasmic OS=Sus scrofa GN=GOT1 PE=1 SV=3	0	99	VGGVQSLGGTGALR			1270.7	636.356	1270.7	636.357	2	18
23.04	45.04	P00503	AATC_PIG	Aspartate aminotransferase, cytoplasmic OS=Sus scrofa GN=GOT1 PE=1 SV=3	0	99	VGGVQSLGGTGALR			1270.7	636.357	1270.7	636.357	2	12
23.04	45.04	P00503	AATC_PIG	Aspartate aminotransferase, cytoplasmic OS=Sus scrofa GN=GOT1 PE=1 SV=3	0	99	VGGVQSLGGTGALR			1270.7	636.356	1270.7	636.357	2	14
23.04	45.04	P00503	AATC_PIG	Aspartate aminotransferase, cytoplasmic OS=Sus scrofa GN=GOT1 PE=1 SV=3	0	88.6	VTWSNPPAQGAR			1282.64	642.328	1282.64	642.328	2	7
6.04	9.767	P00506	AATM_PIG	Aspartate aminotransferase, mitochondrial OS=Sus scrofa GN=GOT2 PE=1 SV=2	2	99	IASTILTSPDLR			1285.72	643.868	1285.72	643.869	2	13
6.04	9.767	P00506	AATM_PIG	Aspartate aminotransferase, mitochondrial OS=Sus scrofa GN=GOT2 PE=1 SV=2	2	99	ISVAGVTSGNVGYLAH		cleaved H-A@C-term	1543.8	772.907	1543.8	772.907	2	12
6.04	9.767	P00506	AATM_PIG	Aspartate aminotransferase, mitochondrial OS=Sus scrofa GN=GOT2 PE=1 SV=2	2	99	YVTVQTISGTGALR			1464.79	733.404	1464.79	733.404	2	12
6.04	9.767	P00506	AATM_PIG	Aspartate aminotransferase, mitochondrial OS=Sus scrofa GN=GOT2 PE=1 SV=2	0.0245682	39.38	VGAFTVVCKDAEEAKR	Carboxymethyl(C)@8	missed K-D@9; missed K-R@15	1779.91	594.311	1779.88	594.301	3	4
6.04	9.767	P00506	AATM_PIG	Aspartate aminotransferase, mitochondrial OS=Sus scrofa GN=GOT2 PE=1 SV=2	0.00744648	16.18	VGAFTVVCKDAEEAK	Carboxymethyl(C)@8	missed K-D@9	1623.79	812.9	1623.78	812.898	2	4
6.04	9.767	P00506	AATM_PIG	Aspartate aminotransferase, mitochondrial OS=Sus scrofa GN=GOT2 PE=1 SV=2	0.00305075	19.21	VESQLKILIR		cleaved R-P@C-term; missed K-I@6	1197.73	400.251	1197.74	400.255	3	6
6.04	9.767	P00506	AATM_PIG	Aspartate aminotransferase, mitochondrial OS=Sus scrofa GN=GOT2 PE=1 SV=2	0	45.34	EYLPIGGLAEFCK	Carboxymethyl(C)@12; Amidated@C-term		1495.74	748.876	1495.74	748.876	2	7
6.04	9.767	P00506	AATM_PIG	Aspartate aminotransferase, mitochondrial OS=Sus scrofa GN=GOT2 PE=1 SV=2	0	99	IASTILTSPDLR			1285.72	643.869	1285.72	643.869	2	10
6.04	9.767	P00506	AATM_PIG	Aspartate aminotransferase, mitochondrial OS=Sus scrofa GN=GOT2 PE=1 SV=2	0	64.77	IGANFLQR	Deamidated(N)@4; Methyl(L)@6		932.544	467.279	932.508	467.261	2	8
6.04	9.767	P00506	AATM_PIG	Aspartate aminotransferase, mitochondrial OS=Sus scrofa GN=GOT2 PE=1 SV=2	0	33.19	IGANFLQR	Carboxymethyl@N-term; Deamidated(N)@4		976.535	489.275	976.498	489.256	2	6
6.04	9.767	P00506	AATM_PIG	Aspartate aminotransferase, mitochondrial OS=Sus scrofa GN=GOT2 PE=1 SV=2	0	51.13	SAELALGENNEVLK	Deamidated(N)@9; Deamidated(N)@10	cleaved A-S@N-term	1487.75	744.88	1487.74	744.875	2	10
6.04	9.767	P00506	AATM_PIG	Aspartate aminotransferase, mitochondrial OS=Sus scrofa GN=GOT2 PE=1 SV=2	0	44.88	SAELALGENNEVLK	Deamidated(N)@9; Deamidated(N)@10	cleaved A-S@N-term	1487.75	744.881	1487.74	744.875	2	10
6.04	9.767	P00506	AATM_PIG	Aspartate aminotransferase, mitochondrial OS=Sus scrofa GN=GOT2 PE=1 SV=2	0	72.16	TCGFDFTGALEDISK	Carboxymethyl(C)@2		1659.75	830.881	1660.73	831.372	2	9
6.04	9.767	P00506	AATM_PIG	Aspartate aminotransferase, mitochondrial OS=Sus scrofa GN=GOT2 PE=1 SV=2	0	96.91	YVTVQTISGTGALR			1464.8	733.406	1464.79	733.404	2	7
8	59.77	P12026	ACBP_PIG	Acyl-CoA-binding protein OS=Sus scrofa GN=DBI PE=1 SV=2	2	99	AYINKVEELK		missed K-V@5	1205.67	603.84	1205.67	603.84	2	16
8	59.77	P12026	ACBP_PIG	Acyl-CoA-binding protein OS=Sus scrofa GN=DBI PE=1 SV=2	2	99	QATVGDINTERPGILDLK			1939.04	970.528	1939.04	970.526	2	15
8	59.77	P12026	ACBP_PIG	Acyl-CoA-binding protein OS=Sus scrofa GN=DBI PE=1 SV=2	2	99	TKPADDEMLFIYSHYK			1956.93	979.47	1956.93	979.472	2	11
8	59.77	P12026	ACBP_PIG	Acyl-CoA-binding protein OS=Sus scrofa GN=DBI PE=1 SV=2	2	99	WDAWNGLK			988.478	495.246	988.477	495.246	2	7
8	59.77	P12026	ACBP_PIG	Acyl-CoA-binding protein OS=Sus scrofa GN=DBI PE=1 SV=2	0	99	AYINKVEELK		missed K-V@5	1205.67	402.896	1205.67	402.896	3	13
8	59.77	P12026	ACBP_PIG	Acyl-CoA-binding protein OS=Sus scrofa GN=DBI PE=1 SV=2	0	99	AYINKVEELK		missed K-V@5	1205.67	603.84	1205.67	603.84	2	11
8	59.77	P12026	ACBP_PIG	Acyl-CoA-binding protein OS=Sus scrofa GN=DBI PE=1 SV=2	0	99	AYINKVEELK		missed K-V@5	1205.67	603.841	1205.67	603.84	2	14
8	59.77	P12026	ACBP_PIG	Acyl-CoA-binding protein OS=Sus scrofa GN=DBI PE=1 SV=2	0	96.03	AYINKVEELK		missed K-V@5	1205.66	402.895	1205.67	402.896	3	10
8	59.77	P12026	ACBP_PIG	Acyl-CoA-binding protein OS=Sus scrofa GN=DBI PE=1 SV=2	0	95.78	AYINKVEELK		missed K-V@5	1205.67	402.896	1205.67	402.896	3	10
8	59.77	P12026	ACBP_PIG	Acyl-CoA-binding protein OS=Sus scrofa GN=DBI PE=1 SV=2	0	58.34	AYINKVEELK		missed K-V@5	1205.66	402.896	1205.67	402.896	3	9
8	59.77	P12026	ACBP_PIG	Acyl-CoA-binding protein OS=Sus scrofa GN=DBI PE=1 SV=2	0	34.84	KEDAMKAYINK		cleaved S-K@N-term; missed K-E@1; missed K-A@6	1309.7	655.858	1309.67	655.842	2	6
8	59.77	P12026	ACBP_PIG	Acyl-CoA-binding protein OS=Sus scrofa GN=DBI PE=1 SV=2	0	99	QATVGDINTERPGILDLK	Gln->pyro-Glu@N-term		1922.01	962.013	1922.01	962.013	2	14
8	59.77	P12026	ACBP_PIG	Acyl-CoA-binding protein OS=Sus scrofa GN=DBI PE=1 SV=2	0	99	QATVGDINTERPGILDLK			1939.04	647.353	1939.04	647.353	3	16
8	59.77	P12026	ACBP_PIG	Acyl-CoA-binding protein OS=Sus scrofa GN=DBI PE=1 SV=2	0	99	QATVGDINTERPGILDLK			1939.04	647.354	1939.04	647.353	3	17
8	59.77	P12026	ACBP_PIG	Acyl-CoA-binding protein OS=Sus scrofa GN=DBI PE=1 SV=2	0	99	QATVGDINTERPGILDLK	Gln->pyro-Glu@N-term		1922.01	962.014	1922.01	962.013	2	13
8	59.77	P12026	ACBP_PIG	Acyl-CoA-binding protein OS=Sus scrofa GN=DBI PE=1 SV=2	0	99	QATVGDINTERPGILDLK	Gln->pyro-Glu@N-term		1922.01	962.012	1922.01	962.013	2	14
8	59.77	P12026	ACBP_PIG	Acyl-CoA-binding protein OS=Sus scrofa GN=DBI PE=1 SV=2	0	99	QATVGDINTERPGILDLK			1939.04	970.527	1939.04	970.526	2	15
8	59.77	P12026	ACBP_PIG	Acyl-CoA-binding protein OS=Sus scrofa GN=DBI PE=1 SV=2	0	99	QATVGDINTERPGILDLK			1939.04	970.527	1939.04	970.526	2	14
8	59.77	P12026	ACBP_PIG	Acyl-CoA-binding protein OS=Sus scrofa GN=DBI PE=1 SV=2	0	99	QATVGDINTERPGILDLK			1939.04	647.354	1939.04	647.353	3	14
8	59.77	P12026	ACBP_PIG	Acyl-CoA-binding protein OS=Sus scrofa GN=DBI PE=1 SV=2	0	99	QATVGDINTERPGILDLK			1939.04	970.527	1939.04	970.526	2	10
8	59.77	P12026	ACBP_PIG	Acyl-CoA-binding protein OS=Sus scrofa GN=DBI PE=1 SV=2	0	99	QATVGDINTERPGILDLK	Gln->pyro-Glu@N-term		1922.01	962.014	1922.01	962.013	2	10
8	59.77	P12026	ACBP_PIG	Acyl-CoA-binding protein OS=Sus scrofa GN=DBI PE=1 SV=2	0	99	QATVGDINTERPGILDLK			1939.04	647.353	1939.04	647.353	3	11
8	59.77	P12026	ACBP_PIG	Acyl-CoA-binding protein OS=Sus scrofa GN=DBI PE=1 SV=2	0	99	QATVGDINTERPGILDLK			1939.04	970.525	1939.04	970.526	2	13
8	59.77	P12026	ACBP_PIG	Acyl-CoA-binding protein OS=Sus scrofa GN=DBI PE=1 SV=2	0	99	QATVGDINTERPGILDLK	Gln->pyro-Glu@N-term		1922.01	962.013	1922.01	962.013	2	11
8	59.77	P12026	ACBP_PIG	Acyl-CoA-binding protein OS=Sus scrofa GN=DBI PE=1 SV=2	0	99	QATVGDINTERPGILDLK			1939.04	970.529	1939.04	970.526	2	9
8	59.77	P12026	ACBP_PIG	Acyl-CoA-binding protein OS=Sus scrofa GN=DBI PE=1 SV=2	0	99	QATVGDINTERPGILDLK	Gln->pyro-Glu@N-term		1922.01	962.011	1922.01	962.013	2	9
8	59.77	P12026	ACBP_PIG	Acyl-CoA-binding protein OS=Sus scrofa GN=DBI PE=1 SV=2	0	98.58	QATVGDINTERPGILDLK			1939.04	647.353	1939.04	647.353	3	8
8	59.77	P12026	ACBP_PIG	Acyl-CoA-binding protein OS=Sus scrofa GN=DBI PE=1 SV=2	0	98.11	QATVGDINTERPGILDLK	Gln->pyro-Glu@N-term		1922.01	962.011	1922.01	962.013	2	8
8	59.77	P12026	ACBP_PIG	Acyl-CoA-binding protein OS=Sus scrofa GN=DBI PE=1 SV=2	0	97.69	QATVGDINTERPGILDLK			1939.04	647.354	1939.04	647.353	3	10
8	59.77	P12026	ACBP_PIG	Acyl-CoA-binding protein OS=Sus scrofa GN=DBI PE=1 SV=2	0	96.55	QATVGDINTERPGILDLK			1939.04	970.529	1939.04	970.526	2	8
8	59.77	P12026	ACBP_PIG	Acyl-CoA-binding protein OS=Sus scrofa GN=DBI PE=1 SV=2	0	96.29	QATVGDINTERPGILDLK			1939.04	647.354	1939.04	647.353	3	11
8	59.77	P12026	ACBP_PIG	Acyl-CoA-binding protein OS=Sus scrofa GN=DBI PE=1 SV=2	0	96.18	QATVGDINTERPGILDLK			1939.04	970.527	1939.04	970.526	2	7
8	59.77	P12026	ACBP_PIG	Acyl-CoA-binding protein OS=Sus scrofa GN=DBI PE=1 SV=2	0	93.31	QATVGDINTERPGILDLK	Gln->pyro-Glu@N-term		1922.01	962.011	1922.01	962.013	2	7
8	59.77	P12026	ACBP_PIG	Acyl-CoA-binding protein OS=Sus scrofa GN=DBI PE=1 SV=2	0	88.32	QATVGDINTERPGILDLK			1939.04	970.529	1939.04	970.526	2	7
8	59.77	P12026	ACBP_PIG	Acyl-CoA-binding protein OS=Sus scrofa GN=DBI PE=1 SV=2	0	71.37	QATVGDINTERPGILDLK			1939.04	647.353	1939.04	647.353	3	7
8	59.77	P12026	ACBP_PIG	Acyl-CoA-binding protein OS=Sus scrofa GN=DBI PE=1 SV=2	0	70.55	QATVGDINTERPGILDLK	Gln->pyro-Glu@N-term		1922.01	962.011	1922.01	962.013	2	7
8	59.77	P12026	ACBP_PIG	Acyl-CoA-binding protein OS=Sus scrofa GN=DBI PE=1 SV=2	0	67.38	QATVGDINTERPGILDLK			1939.04	970.529	1939.04	970.526	2	6
8	59.77	P12026	ACBP_PIG	Acyl-CoA-binding protein OS=Sus scrofa GN=DBI PE=1 SV=2	0	62.62	QATVGDINTERPGILDLK	Gln->pyro-Glu@N-term		1922.01	962.013	1922.01	962.013	2	6
8	59.77	P12026	ACBP_PIG	Acyl-CoA-binding protein OS=Sus scrofa GN=DBI PE=1 SV=2	0	48.97	QATVGDINTERPGILDLK			1939.04	647.354	1939.04	647.353	3	8
8	59.77	P12026	ACBP_PIG	Acyl-CoA-binding protein OS=Sus scrofa GN=DBI PE=1 SV=2	0	42.19	QATVGDINTERPGILDLK			1939.04	647.353	1939.04	647.353	3	8
8	59.77	P12026	ACBP_PIG	Acyl-CoA-binding protein OS=Sus scrofa GN=DBI PE=1 SV=2	0	39.67	QATVGDINTERPGILDLK			1939.04	970.529	1939.04	970.526	2	6
8	59.77	P12026	ACBP_PIG	Acyl-CoA-binding protein OS=Sus scrofa GN=DBI PE=1 SV=2	0	21.8	QATVGDINTERPGILDLK	Deamidated(N)@8		1940.04	647.688	1940.02	647.681	3	7
8	59.77	P12026	ACBP_PIG	Acyl-CoA-binding protein OS=Sus scrofa GN=DBI PE=1 SV=2	0	57.36	TERPGILDLK	Oxidation(P)@4	cleaved N-T@N-term	1156.66	579.34	1156.65	579.33	2	7
8	59.77	P12026	ACBP_PIG	Acyl-CoA-binding protein OS=Sus scrofa GN=DBI PE=1 SV=2	0	99	TKPADDEMLFIYSHYK			1956.93	490.24	1956.93	490.24	4	14
8	59.77	P12026	ACBP_PIG	Acyl-CoA-binding protein OS=Sus scrofa GN=DBI PE=1 SV=2	0	99	TKPADDEMLFIYSHYK			1956.93	653.316	1956.93	653.317	3	14
8	59.77	P12026	ACBP_PIG	Acyl-CoA-binding protein OS=Sus scrofa GN=DBI PE=1 SV=2	0	99	TKPADDEMLFIYSHYK			1956.93	490.239	1956.93	490.24	4	11
8	59.77	P12026	ACBP_PIG	Acyl-CoA-binding protein OS=Sus scrofa GN=DBI PE=1 SV=2	0	96.18	TKPADDEMLFIYSHYK			1956.93	979.474	1956.93	979.472	2	7
8	59.77	P12026	ACBP_PIG	Acyl-CoA-binding protein OS=Sus scrofa GN=DBI PE=1 SV=2	0	76.22	TKPADDEMLFIYSHYK			1956.93	490.24	1956.93	490.24	4	6
8	59.77	P12026	ACBP_PIG	Acyl-CoA-binding protein OS=Sus scrofa GN=DBI PE=1 SV=2	0	65.22	TKPADDEMLFIYSHYK	Acetyl@N-term		1998.95	667.323	1998.94	667.32	3	7
8	59.77	P12026	ACBP_PIG	Acyl-CoA-binding protein OS=Sus scrofa GN=DBI PE=1 SV=2	0	98.59	WDAWNGLK			988.474	495.245	988.477	495.246	2	6
8	59.77	P12026	ACBP_PIG	Acyl-CoA-binding protein OS=Sus scrofa GN=DBI PE=1 SV=2	0	34	WDAWNGLK	Deamidated(N)@5		989.464	495.739	989.461	495.738	2	5
8	59.77	P12026	ACBP_PIG	Acyl-CoA-binding protein OS=Sus scrofa GN=DBI PE=1 SV=2	0	22.85	WDAWNGLK			988.479	495.247	988.477	495.246	2	5
90.36	73.33	Q6QAQ1	ACTB_PIG	Actin, cytoplasmic 1 OS=Sus scrofa GN=ACTB PE=2 SV=2	2	99	ANTVLSGGTTMYPGIADR		cleaved Y-A@N-term	1822.89	912.453	1822.89	912.451	2	15
90.36	73.33	Q6QAQ1	ACTB_PIG	Actin, cytoplasmic 1 OS=Sus scrofa GN=ACTB PE=2 SV=2	2	99	APEEHPVLLTEAPLNPK		cleaved V-A@N-term	1853.99	619.002	1853.99	619.004	3	16
90.36	73.33	Q6QAQ1	ACTB_PIG	Actin, cytoplasmic 1 OS=Sus scrofa GN=ACTB PE=2 SV=2	2	99	DDDIAALVVDNGSGMCK	Protein Terminal Acetyl@N-term; Deamidated(N)@11; Carboxymethyl(C)@16; Amidated@C-term	cleaved M-D@N-term	1821.77	911.894	1821.78	911.895	2	15
90.36	73.33	Q6QAQ1	ACTB_PIG	Actin, cytoplasmic 1 OS=Sus scrofa GN=ACTB PE=2 SV=2	2	99	DLYANTVLSGGTTMYPGIADR			2214.06	1108.04	2214.06	1108.04	2	12
90.36	73.33	Q6QAQ1	ACTB_PIG	Actin, cytoplasmic 1 OS=Sus scrofa GN=ACTB PE=2 SV=2	2	99	EEHPVLLTEAPLNPK		cleaved P-E@N-term	1685.9	843.956	1685.9	843.957	2	16
90.36	73.33	Q6QAQ1	ACTB_PIG	Actin, cytoplasmic 1 OS=Sus scrofa GN=ACTB PE=2 SV=2	2	99	EHPVLLTEAPLNPK		cleaved E-E@N-term	1556.86	519.959	1556.86	519.959	3	14
90.36	73.33	Q6QAQ1	ACTB_PIG	Actin, cytoplasmic 1 OS=Sus scrofa GN=ACTB PE=2 SV=2	2	99	GYSFTTTAER			1131.52	566.768	1131.52	566.767	2	10
90.36	73.33	Q6QAQ1	ACTB_PIG	Actin, cytoplasmic 1 OS=Sus scrofa GN=ACTB PE=2 SV=2	2	99	KDLYANTVLSGGTTMYPGIADR	Oxidation(M)@15	missed K-D@1	2358.16	787.061	2358.15	787.058	3	17
90.36	73.33	Q6QAQ1	ACTB_PIG	Actin, cytoplasmic 1 OS=Sus scrofa GN=ACTB PE=2 SV=2	2	99	LCYVALDFEQEMATAASSSSLEK	Carboxymethyl(C)@2		2549.17	850.73	2550.15	851.057	3	12
90.36	73.33	Q6QAQ1	ACTB_PIG	Actin, cytoplasmic 1 OS=Sus scrofa GN=ACTB PE=2 SV=2	2	99	PIEHGIVTNWDDMEK	Methyl(H)@4	cleaved Y-P@N-term	1796.84	599.954	1796.84	599.954	3	17
90.36	73.33	Q6QAQ1	ACTB_PIG	Actin, cytoplasmic 1 OS=Sus scrofa GN=ACTB PE=2 SV=2	2	99	QEYDESGPSIVH		cleaved H-R@C-term	1359.59	680.805	1359.59	680.804	2	13
90.36	73.33	Q6QAQ1	ACTB_PIG	Actin, cytoplasmic 1 OS=Sus scrofa GN=ACTB PE=2 SV=2	2	99	QEYDESGPSIVHR	Gln->pyro-Glu@N-term		1498.67	750.342	1498.67	750.342	2	16
90.36	73.33	Q6QAQ1	ACTB_PIG	Actin, cytoplasmic 1 OS=Sus scrofa GN=ACTB PE=2 SV=2	2	99	RVAPEEHPVLLTEAPLNPK		cleaved L-R@N-term; missed R-V@1	2109.15	528.296	2109.16	528.297	4	15
90.36	73.33	Q6QAQ1	ACTB_PIG	Actin, cytoplasmic 1 OS=Sus scrofa GN=ACTB PE=2 SV=2	2	99	TTGIVMDSGDGVTHTVPIYEGY		cleaved Y-A@C-term	2311.07	1156.54	2311.07	1156.54	2	11
90.36	73.33	Q6QAQ1	ACTB_PIG	Actin, cytoplasmic 1 OS=Sus scrofa GN=ACTB PE=2 SV=2	2	99	TTGIVMDSGDGVTHTVPIYEGYALPH		cleaved H-A@C-term	2729.3	910.775	2729.3	910.774	3	16
90.36	73.33	Q6QAQ1	ACTB_PIG	Actin, cytoplasmic 1 OS=Sus scrofa GN=ACTB PE=2 SV=2	2	99	TTGIVMDSGDGVTHTVPIYEGYALPHAILR			3182.6	796.657	3182.61	796.659	4	15
90.36	73.33	Q6QAQ1	ACTB_PIG	Actin, cytoplasmic 1 OS=Sus scrofa GN=ACTB PE=2 SV=2	2	99	TVLSGGTTMYPGIADR		cleaved N-T@N-term	1637.81	819.912	1637.81	819.911	2	17
90.36	73.33	Q6QAQ1	ACTB_PIG	Actin, cytoplasmic 1 OS=Sus scrofa GN=ACTB PE=2 SV=2	2	99	TVPIYEGYALPHAILR		cleaved H-T@N-term	1812	605.006	1811.99	605.005	3	13
90.36	73.33	Q6QAQ1	ACTB_PIG	Actin, cytoplasmic 1 OS=Sus scrofa GN=ACTB PE=2 SV=2	2	99	VAPEEHPVLLTEAPLNPK			1953.06	652.026	1953.06	652.026	3	13
90.36	73.33	Q6QAQ1	ACTB_PIG	Actin, cytoplasmic 1 OS=Sus scrofa GN=ACTB PE=2 SV=2	2	99	YPIEHGIVTNWDDMEK	Methyl(H)@5; Oxidation(M)@14		1975.9	659.64	1975.9	659.64	3	16
90.36	73.33	Q6QAQ1	ACTB_PIG	Actin, cytoplasmic 1 OS=Sus scrofa GN=ACTB PE=2 SV=2	1.12494	99	TTGIVMDSGDGVTH		cleaved H-T@C-term	1388.63	695.324	1388.62	695.319	2	10
90.36	73.33	Q6QAQ1	ACTB_PIG	Actin, cytoplasmic 1 OS=Sus scrofa GN=ACTB PE=2 SV=2	0.598599	98.75	TVPIYEGYALPH		cleaved H-T@N-term; cleaved H-A@C-term	1358.68	680.35	1358.69	680.351	2	10
90.36	73.33	Q6QAQ1	ACTB_PIG	Actin, cytoplasmic 1 OS=Sus scrofa GN=ACTB PE=2 SV=2	0.244125	98.88	VLSGGTTMYPGIADR		cleaved T-V@N-term	1536.76	769.387	1536.76	769.388	2	14
90.36	73.33	Q6QAQ1	ACTB_PIG	Actin, cytoplasmic 1 OS=Sus scrofa GN=ACTB PE=2 SV=2	0.173925	53.99	IIAPPERKYSVWIGGSILASLSTFQQMWISKQEYDESGPSIVHR		missed R-K@7; missed K-Y@8; missed K-Q@31	5003.59	834.939	5003.56	834.935	6	8
90.36	73.33	Q6QAQ1	ACTB_PIG	Actin, cytoplasmic 1 OS=Sus scrofa GN=ACTB PE=2 SV=2	0.110138	95.72	VALDFEQEMATAASSSSLEK		cleaved Y-V@N-term	2112.99	1057.5	2112.99	1057.5	2	8
90.36	73.33	Q6QAQ1	ACTB_PIG	Actin, cytoplasmic 1 OS=Sus scrofa GN=ACTB PE=2 SV=2	0.106238	86.38	TVPIYEGY		cleaved H-T@N-term; cleaved Y-A@C-term	940.455	471.235	940.454	471.234	2	7
90.36	73.33	Q6QAQ1	ACTB_PIG	Actin, cytoplasmic 1 OS=Sus scrofa GN=ACTB PE=2 SV=2	0.0990869	94.4	GIVTNWDDMEK		cleaved H-G@N-term	1306.61	654.311	1306.59	654.3	2	7
90.36	73.33	Q6QAQ1	ACTB_PIG	Actin, cytoplasmic 1 OS=Sus scrofa GN=ACTB PE=2 SV=2	0.0315171	64.69	PHAILR		cleaved L-P@N-term	705.428	353.721	705.429	353.722	2	5
90.36	73.33	Q6QAQ1	ACTB_PIG	Actin, cytoplasmic 1 OS=Sus scrofa GN=ACTB PE=2 SV=2	0.0282604	80.42	VAPEEHPVLLTEAPLN		cleaved N-P@C-term	1727.91	864.962	1727.91	864.962	2	10
90.36	73.33	Q6QAQ1	ACTB_PIG	Actin, cytoplasmic 1 OS=Sus scrofa GN=ACTB PE=2 SV=2	0.0109954	92.91	YVALDFEQEMATAASSSSLEK		cleaved C-Y@N-term	2276.06	1139.04	2276.05	1139.03	2	9
90.36	73.33	Q6QAQ1	ACTB_PIG	Actin, cytoplasmic 1 OS=Sus scrofa GN=ACTB PE=2 SV=2	0.0070049	68.87	ALDFEQEMATAASSSSLEK		cleaved V-A@N-term	2013.92	1007.97	2013.92	1007.97	2	7
90.36	73.33	Q6QAQ1	ACTB_PIG	Actin, cytoplasmic 1 OS=Sus scrofa GN=ACTB PE=2 SV=2	0.00612309	60.69	VAPEEHPVLLTEAPLNP		cleaved P-K@C-term	1824.96	913.487	1824.96	913.488	2	8
90.36	73.33	Q6QAQ1	ACTB_PIG	Actin, cytoplasmic 1 OS=Sus scrofa GN=ACTB PE=2 SV=2	0.00130484	77.57	CDVDIR	Carboxymethyl(C)@1; Dehydrated(D)@2		759.326	380.67	759.322	380.668	2	7
90.36	73.33	Q6QAQ1	ACTB_PIG	Actin, cytoplasmic 1 OS=Sus scrofa GN=ACTB PE=2 SV=2	0.00130484	99	LDFEQEMATAASSSSLEK		cleaved A-L@N-term	1942.88	972.448	1942.88	972.449	2	11
90.36	73.33	Q6QAQ1	ACTB_PIG	Actin, cytoplasmic 1 OS=Sus scrofa GN=ACTB PE=2 SV=2	0.00130484	93.08	NSIMKCDVDIRKDLYANTVLSGGTTMYPGIADR	Carboxymethyl(C)@6	cleaved F-N@N-term; missed K-C@5; missed R-K@11; missed K-D@12	3673.75	919.444	3674.77	919.701	4	13
90.36	73.33	Q6QAQ1	ACTB_PIG	Actin, cytoplasmic 1 OS=Sus scrofa GN=ACTB PE=2 SV=2	0.000869459	58.89	DDDIAALVVDNGSGMC	Protein Terminal Acetyl@N-term; Carboxymethyl(C)@16	cleaved M-D@N-term; cleaved C-K@C-term	1693.69	847.851	1693.68	847.848	2	7
90.36	73.33	Q6QAQ1	ACTB_PIG	Actin, cytoplasmic 1 OS=Sus scrofa GN=ACTB PE=2 SV=2	0.000434512	89.23	REIVRDIKEKLCYVALDFEQEMATAASSSSLEKSYELPDGQVITIGNER	Carboxymethyl(C)@12	cleaved E-R@N-term; missed R-E@1; missed R-D@5; missed K-E@8; missed K-L@10; missed K-S@33	5587.73	1118.55	5588.77	1118.76	5	11
90.36	73.33	Q6QAQ1	ACTB_PIG	Actin, cytoplasmic 1 OS=Sus scrofa GN=ACTB PE=2 SV=2	0.000434512	28.56	VAPEEHPVLLTE		cleaved E-A@C-term	1332.69	667.353	1332.69	667.354	2	9
90.36	73.33	Q6QAQ1	ACTB_PIG	Actin, cytoplasmic 1 OS=Sus scrofa GN=ACTB PE=2 SV=2	0	99	AGFAGDDAPR			975.44	488.727	975.441	488.728	2	10
90.36	73.33	Q6QAQ1	ACTB_PIG	Actin, cytoplasmic 1 OS=Sus scrofa GN=ACTB PE=2 SV=2	0	99	AGFAGDDAPR			975.44	488.727	975.441	488.728	2	12
90.36	73.33	Q6QAQ1	ACTB_PIG	Actin, cytoplasmic 1 OS=Sus scrofa GN=ACTB PE=2 SV=2	0	99	AGFAGDDAPR			975.441	488.728	975.441	488.728	2	11
90.36	73.33	Q6QAQ1	ACTB_PIG	Actin, cytoplasmic 1 OS=Sus scrofa GN=ACTB PE=2 SV=2	0	99	AGFAGDDAPR			975.442	488.728	975.441	488.728	2	10
90.36	73.33	Q6QAQ1	ACTB_PIG	Actin, cytoplasmic 1 OS=Sus scrofa GN=ACTB PE=2 SV=2	0	99	AGFAGDDAPR			975.442	488.728	975.441	488.728	2	15
90.36	73.33	Q6QAQ1	ACTB_PIG	Actin, cytoplasmic 1 OS=Sus scrofa GN=ACTB PE=2 SV=2	0	99	AGFAGDDAPR			975.442	488.728	975.441	488.728	2	12
90.36	73.33	Q6QAQ1	ACTB_PIG	Actin, cytoplasmic 1 OS=Sus scrofa GN=ACTB PE=2 SV=2	0	99	AGFAGDDAPR			975.442	488.728	975.441	488.728	2	11
90.36	73.33	Q6QAQ1	ACTB_PIG	Actin, cytoplasmic 1 OS=Sus scrofa GN=ACTB PE=2 SV=2	0	99	AGFAGDDAPR			975.443	488.729	975.441	488.728	2	9
90.36	73.33	Q6QAQ1	ACTB_PIG	Actin, cytoplasmic 1 OS=Sus scrofa GN=ACTB PE=2 SV=2	0	99	AGFAGDDAPR			975.44	488.727	975.441	488.728	2	7
90.36	73.33	Q6QAQ1	ACTB_PIG	Actin, cytoplasmic 1 OS=Sus scrofa GN=ACTB PE=2 SV=2	0	99	AGFAGDDAPR			975.439	488.727	975.441	488.728	2	9
90.36	73.33	Q6QAQ1	ACTB_PIG	Actin, cytoplasmic 1 OS=Sus scrofa GN=ACTB PE=2 SV=2	0	99	AGFAGDDAPR			975.441	488.728	975.441	488.728	2	11
90.36	73.33	Q6QAQ1	ACTB_PIG	Actin, cytoplasmic 1 OS=Sus scrofa GN=ACTB PE=2 SV=2	0	99	AGFAGDDAPR			975.441	488.728	975.441	488.728	2	13
90.36	73.33	Q6QAQ1	ACTB_PIG	Actin, cytoplasmic 1 OS=Sus scrofa GN=ACTB PE=2 SV=2	0	99	AGFAGDDAPR			975.44	488.728	975.441	488.728	2	13
90.36	73.33	Q6QAQ1	ACTB_PIG	Actin, cytoplasmic 1 OS=Sus scrofa GN=ACTB PE=2 SV=2	0	99	AGFAGDDAPR			975.441	488.728	975.441	488.728	2	16
90.36	73.33	Q6QAQ1	ACTB_PIG	Actin, cytoplasmic 1 OS=Sus scrofa GN=ACTB PE=2 SV=2	0	99	AGFAGDDAPR			975.441	488.728	975.441	488.728	2	16
90.36	73.33	Q6QAQ1	ACTB_PIG	Actin, cytoplasmic 1 OS=Sus scrofa GN=ACTB PE=2 SV=2	0	99	AGFAGDDAPR			975.441	488.728	975.441	488.728	2	14
90.36	73.33	Q6QAQ1	ACTB_PIG	Actin, cytoplasmic 1 OS=Sus scrofa GN=ACTB PE=2 SV=2	0	99	AGFAGDDAPR			975.441	488.728	975.441	488.728	2	13
90.36	73.33	Q6QAQ1	ACTB_PIG	Actin, cytoplasmic 1 OS=Sus scrofa GN=ACTB PE=2 SV=2	0	99	AGFAGDDAPR			975.441	488.728	975.441	488.728	2	12
90.36	73.33	Q6QAQ1	ACTB_PIG	Actin, cytoplasmic 1 OS=Sus scrofa GN=ACTB PE=2 SV=2	0	99	AGFAGDDAPR			975.441	488.728	975.441	488.728	2	13
90.36	73.33	Q6QAQ1	ACTB_PIG	Actin, cytoplasmic 1 OS=Sus scrofa GN=ACTB PE=2 SV=2	0	99	AGFAGDDAPR			975.441	488.728	975.441	488.728	2	13
90.36	73.33	Q6QAQ1	ACTB_PIG	Actin, cytoplasmic 1 OS=Sus scrofa GN=ACTB PE=2 SV=2	0	99	AGFAGDDAPR			975.441	488.728	975.441	488.728	2	10
90.36	73.33	Q6QAQ1	ACTB_PIG	Actin, cytoplasmic 1 OS=Sus scrofa GN=ACTB PE=2 SV=2	0	99	AGFAGDDAPR			975.441	488.728	975.441	488.728	2	10
90.36	73.33	Q6QAQ1	ACTB_PIG	Actin, cytoplasmic 1 OS=Sus scrofa GN=ACTB PE=2 SV=2	0	99	AGFAGDDAPR			975.439	488.727	975.441	488.728	2	11
90.36	73.33	Q6QAQ1	ACTB_PIG	Actin, cytoplasmic 1 OS=Sus scrofa GN=ACTB PE=2 SV=2	0	99	AGFAGDDAPR			975.441	488.728	975.441	488.728	2	13
90.36	73.33	Q6QAQ1	ACTB_PIG	Actin, cytoplasmic 1 OS=Sus scrofa GN=ACTB PE=2 SV=2	0	99	AGFAGDDAPR			975.441	488.728	975.441	488.728	2	12
90.36	73.33	Q6QAQ1	ACTB_PIG	Actin, cytoplasmic 1 OS=Sus scrofa GN=ACTB PE=2 SV=2	0	99	AGFAGDDAPR			975.441	488.728	975.441	488.728	2	7
90.36	73.33	Q6QAQ1	ACTB_PIG	Actin, cytoplasmic 1 OS=Sus scrofa GN=ACTB PE=2 SV=2	0	99	AGFAGDDAPR			975.442	488.728	975.441	488.728	2	11
90.36	73.33	Q6QAQ1	ACTB_PIG	Actin, cytoplasmic 1 OS=Sus scrofa GN=ACTB PE=2 SV=2	0	99	AGFAGDDAPR			975.44	488.727	975.441	488.728	2	12
90.36	73.33	Q6QAQ1	ACTB_PIG	Actin, cytoplasmic 1 OS=Sus scrofa GN=ACTB PE=2 SV=2	0	99	AGFAGDDAPR			975.44	488.727	975.441	488.728	2	9
90.36	73.33	Q6QAQ1	ACTB_PIG	Actin, cytoplasmic 1 OS=Sus scrofa GN=ACTB PE=2 SV=2	0	99	AGFAGDDAPR			975.441	488.728	975.441	488.728	2	11
90.36	73.33	Q6QAQ1	ACTB_PIG	Actin, cytoplasmic 1 OS=Sus scrofa GN=ACTB PE=2 SV=2	0	99	AGFAGDDAPR			975.441	488.728	975.441	488.728	2	12
90.36	73.33	Q6QAQ1	ACTB_PIG	Actin, cytoplasmic 1 OS=Sus scrofa GN=ACTB PE=2 SV=2	0	99	AGFAGDDAPR			975.441	488.728	975.441	488.728	2	13
90.36	73.33	Q6QAQ1	ACTB_PIG	Actin, cytoplasmic 1 OS=Sus scrofa GN=ACTB PE=2 SV=2	0	99	AGFAGDDAPR			975.441	488.728	975.441	488.728	2	11
90.36	73.33	Q6QAQ1	ACTB_PIG	Actin, cytoplasmic 1 OS=Sus scrofa GN=ACTB PE=2 SV=2	0	99	AGFAGDDAPR			975.441	488.728	975.441	488.728	2	9
90.36	73.33	Q6QAQ1	ACTB_PIG	Actin, cytoplasmic 1 OS=Sus scrofa GN=ACTB PE=2 SV=2	0	99	AGFAGDDAPR			975.44	488.727	975.441	488.728	2	10
90.36	73.33	Q6QAQ1	ACTB_PIG	Actin, cytoplasmic 1 OS=Sus scrofa GN=ACTB PE=2 SV=2	0	99	AGFAGDDAPR			975.44	488.727	975.441	488.728	2	9
90.36	73.33	Q6QAQ1	ACTB_PIG	Actin, cytoplasmic 1 OS=Sus scrofa GN=ACTB PE=2 SV=2	0	99	AGFAGDDAPR			975.441	488.728	975.441	488.728	2	14
90.36	73.33	Q6QAQ1	ACTB_PIG	Actin, cytoplasmic 1 OS=Sus scrofa GN=ACTB PE=2 SV=2	0	99	AGFAGDDAPR			975.441	488.728	975.441	488.728	2	12
90.36	73.33	Q6QAQ1	ACTB_PIG	Actin, cytoplasmic 1 OS=Sus scrofa GN=ACTB PE=2 SV=2	0	99	AGFAGDDAPR			975.441	488.728	975.441	488.728	2	10
90.36	73.33	Q6QAQ1	ACTB_PIG	Actin, cytoplasmic 1 OS=Sus scrofa GN=ACTB PE=2 SV=2	0	99	AGFAGDDAPR			975.44	488.727	975.441	488.728	2	10
90.36	73.33	Q6QAQ1	ACTB_PIG	Actin, cytoplasmic 1 OS=Sus scrofa GN=ACTB PE=2 SV=2	0	99	AGFAGDDAPR			975.442	488.728	975.441	488.728	2	8
90.36	73.33	Q6QAQ1	ACTB_PIG	Actin, cytoplasmic 1 OS=Sus scrofa GN=ACTB PE=2 SV=2	0	99	AGFAGDDAPR			975.441	488.728	975.441	488.728	2	8
90.36	73.33	Q6QAQ1	ACTB_PIG	Actin, cytoplasmic 1 OS=Sus scrofa GN=ACTB PE=2 SV=2	0	99	AGFAGDDAPR			975.438	488.726	975.441	488.728	2	9
90.36	73.33	Q6QAQ1	ACTB_PIG	Actin, cytoplasmic 1 OS=Sus scrofa GN=ACTB PE=2 SV=2	0	99	AGFAGDDAPR			975.444	488.729	975.441	488.728	2	8
90.36	73.33	Q6QAQ1	ACTB_PIG	Actin, cytoplasmic 1 OS=Sus scrofa GN=ACTB PE=2 SV=2	0	99	AGFAGDDAPR			975.439	488.727	975.441	488.728	2	11
90.36	73.33	Q6QAQ1	ACTB_PIG	Actin, cytoplasmic 1 OS=Sus scrofa GN=ACTB PE=2 SV=2	0	99	AGFAGDDAPR			975.439	488.727	975.441	488.728	2	9
90.36	73.33	Q6QAQ1	ACTB_PIG	Actin, cytoplasmic 1 OS=Sus scrofa GN=ACTB PE=2 SV=2	0	99	AGFAGDDAPR			975.448	488.731	975.441	488.728	2	8
90.36	73.33	Q6QAQ1	ACTB_PIG	Actin, cytoplasmic 1 OS=Sus scrofa GN=ACTB PE=2 SV=2	0	98.99	AGFAGDDAPR			975.441	488.728	975.441	488.728	2	7
90.36	73.33	Q6QAQ1	ACTB_PIG	Actin, cytoplasmic 1 OS=Sus scrofa GN=ACTB PE=2 SV=2	0	98.83	AGFAGDDAPR			975.441	488.728	975.441	488.728	2	10
90.36	73.33	Q6QAQ1	ACTB_PIG	Actin, cytoplasmic 1 OS=Sus scrofa GN=ACTB PE=2 SV=2	0	98.82	AGFAGDDAPR			975.441	488.728	975.441	488.728	2	6
90.36	73.33	Q6QAQ1	ACTB_PIG	Actin, cytoplasmic 1 OS=Sus scrofa GN=ACTB PE=2 SV=2	0	98.47	AGFAGDDAPR			975.44	488.728	975.441	488.728	2	7
90.36	73.33	Q6QAQ1	ACTB_PIG	Actin, cytoplasmic 1 OS=Sus scrofa GN=ACTB PE=2 SV=2	0	97.27	AGFAGDDAPR			975.44	488.727	975.441	488.728	2	7
90.36	73.33	Q6QAQ1	ACTB_PIG	Actin, cytoplasmic 1 OS=Sus scrofa GN=ACTB PE=2 SV=2	0	85.13	AGFAGDDAPR			975.442	488.728	975.441	488.728	2	6
90.36	73.33	Q6QAQ1	ACTB_PIG	Actin, cytoplasmic 1 OS=Sus scrofa GN=ACTB PE=2 SV=2	0	73.01	AGFAGDDAPR			975.441	488.728	975.441	488.728	2	6
90.36	73.33	Q6QAQ1	ACTB_PIG	Actin, cytoplasmic 1 OS=Sus scrofa GN=ACTB PE=2 SV=2	0	35.85	AGFAGDDAPR			975.44	488.727	975.441	488.728	2	5
90.36	73.33	Q6QAQ1	ACTB_PIG	Actin, cytoplasmic 1 OS=Sus scrofa GN=ACTB PE=2 SV=2	0	30.05	AGFAGDDAPR			975.439	488.727	975.441	488.728	2	6
90.36	73.33	Q6QAQ1	ACTB_PIG	Actin, cytoplasmic 1 OS=Sus scrofa GN=ACTB PE=2 SV=2	0	17.6	AGFAGDDAPR			975.438	488.726	975.441	488.728	2	4
90.36	73.33	Q6QAQ1	ACTB_PIG	Actin, cytoplasmic 1 OS=Sus scrofa GN=ACTB PE=2 SV=2	0	99	AGFAGDDAPRAVFPSIVGR	Deamidated(R)@10	cleaved R-P@C-term; missed R-A@10	1902.96	952.486	1902.96	952.487	2	14
90.36	73.33	Q6QAQ1	ACTB_PIG	Actin, cytoplasmic 1 OS=Sus scrofa GN=ACTB PE=2 SV=2	0	99	AGFAGDDAPRAVFPSIVGR	Deamidated(R)@10	cleaved R-P@C-term; missed R-A@10	1902.96	952.486	1902.96	952.487	2	15
90.36	73.33	Q6QAQ1	ACTB_PIG	Actin, cytoplasmic 1 OS=Sus scrofa GN=ACTB PE=2 SV=2	0	99	AGFAGDDAPRAVFPSIVGR	Deamidated(R)@10	cleaved R-P@C-term; missed R-A@10	1902.96	952.487	1902.96	952.487	2	9
90.36	73.33	Q6QAQ1	ACTB_PIG	Actin, cytoplasmic 1 OS=Sus scrofa GN=ACTB PE=2 SV=2	0	97.23	AGFAGDDAPRAVFPSIVGR	Deamidated(R)@10	cleaved R-P@C-term; missed R-A@10	1902.96	635.327	1902.96	635.327	3	10
90.36	73.33	Q6QAQ1	ACTB_PIG	Actin, cytoplasmic 1 OS=Sus scrofa GN=ACTB PE=2 SV=2	0	87.4	AGFAGDDAPRAVFPSIVGR	Deamidated(R)@10	cleaved R-P@C-term; missed R-A@10	1902.96	952.486	1902.96	952.487	2	9
90.36	73.33	Q6QAQ1	ACTB_PIG	Actin, cytoplasmic 1 OS=Sus scrofa GN=ACTB PE=2 SV=2	0	79.43	AGFAGDDAPRAVFPSIVGR	Deamidated(R)@10	cleaved R-P@C-term; missed R-A@10	1902.96	952.486	1902.96	952.487	2	9
90.36	73.33	Q6QAQ1	ACTB_PIG	Actin, cytoplasmic 1 OS=Sus scrofa GN=ACTB PE=2 SV=2	0	79.43	AGFAGDDAPRAVFPSIVGR	Deamidated(R)@10	cleaved R-P@C-term; missed R-A@10	1902.96	952.486	1902.96	952.487	2	10
90.36	73.33	Q6QAQ1	ACTB_PIG	Actin, cytoplasmic 1 OS=Sus scrofa GN=ACTB PE=2 SV=2	0	66.93	AGFAGDDAPRAVFPSIVGR	Deamidated(R)@10	cleaved R-P@C-term; missed R-A@10	1902.96	952.486	1902.96	952.487	2	8
90.36	73.33	Q6QAQ1	ACTB_PIG	Actin, cytoplasmic 1 OS=Sus scrofa GN=ACTB PE=2 SV=2	0	61.46	AGFAGDDAPRAVFPSIVGR	Deamidated(R)@10	cleaved R-P@C-term; missed R-A@10	1902.96	635.327	1902.96	635.327	3	7
90.36	73.33	Q6QAQ1	ACTB_PIG	Actin, cytoplasmic 1 OS=Sus scrofa GN=ACTB PE=2 SV=2	0	60.98	AGFAGDDAPRAVFPSIVGR	Deamidated(R)@10	cleaved R-P@C-term; missed R-A@10	1902.96	952.485	1902.96	952.487	2	8
90.36	73.33	Q6QAQ1	ACTB_PIG	Actin, cytoplasmic 1 OS=Sus scrofa GN=ACTB PE=2 SV=2	0	58.96	ALDFEQEMATAASSSSLEK	Carbamyl@N-term	cleaved V-A@N-term	2056.93	1029.47	2056.93	1029.47	2	11
90.36	73.33	Q6QAQ1	ACTB_PIG	Actin, cytoplasmic 1 OS=Sus scrofa GN=ACTB PE=2 SV=2	0	43.43	ALDFEQEMATAASSSSLEK		cleaved V-A@N-term	2013.92	672.313	2013.92	672.314	3	6
90.36	73.33	Q6QAQ1	ACTB_PIG	Actin, cytoplasmic 1 OS=Sus scrofa GN=ACTB PE=2 SV=2	0	31.47	ALDFEQEMATAASSSSLEK	Carbamyl@N-term	cleaved V-A@N-term	2056.93	686.65	2056.93	686.649	3	11
90.36	73.33	Q6QAQ1	ACTB_PIG	Actin, cytoplasmic 1 OS=Sus scrofa GN=ACTB PE=2 SV=2	0	28.79	ALDFEQEMATAASSSSLEK	Carbamyl@N-term	cleaved V-A@N-term	2056.93	1029.47	2056.93	1029.47	2	7
90.36	73.33	Q6QAQ1	ACTB_PIG	Actin, cytoplasmic 1 OS=Sus scrofa GN=ACTB PE=2 SV=2	0	99	ANTVLSGGTTMYPGIADR		cleaved Y-A@N-term	1822.89	912.453	1822.89	912.451	2	14
90.36	73.33	Q6QAQ1	ACTB_PIG	Actin, cytoplasmic 1 OS=Sus scrofa GN=ACTB PE=2 SV=2	0	99	ANTVLSGGTTMYPGIADR		cleaved Y-A@N-term	1822.89	912.451	1822.89	912.451	2	14
90.36	73.33	Q6QAQ1	ACTB_PIG	Actin, cytoplasmic 1 OS=Sus scrofa GN=ACTB PE=2 SV=2	0	99	ANTVLSGGTTMYPGIADR		cleaved Y-A@N-term	1822.89	912.454	1822.89	912.451	2	9
90.36	73.33	Q6QAQ1	ACTB_PIG	Actin, cytoplasmic 1 OS=Sus scrofa GN=ACTB PE=2 SV=2	0	99	ANTVLSGGTTMYPGIADR		cleaved Y-A@N-term	1822.89	912.451	1822.89	912.451	2	13
90.36	73.33	Q6QAQ1	ACTB_PIG	Actin, cytoplasmic 1 OS=Sus scrofa GN=ACTB PE=2 SV=2	0	54.64	ANTVLSGGTTMYPGIADR		cleaved Y-A@N-term	1822.89	912.45	1822.89	912.451	2	7
90.36	73.33	Q6QAQ1	ACTB_PIG	Actin, cytoplasmic 1 OS=Sus scrofa GN=ACTB PE=2 SV=2	0	54.05	ANTVLSGGTTMYPGIADR		cleaved Y-A@N-term	1822.89	608.637	1822.89	608.637	3	6
90.36	73.33	Q6QAQ1	ACTB_PIG	Actin, cytoplasmic 1 OS=Sus scrofa GN=ACTB PE=2 SV=2	0	99	APEEHPVLLTEAPLNPK	Arg-add@N-term	cleaved V-A@N-term	2010.08	671.033	2010.09	671.037	3	18
90.36	73.33	Q6QAQ1	ACTB_PIG	Actin, cytoplasmic 1 OS=Sus scrofa GN=ACTB PE=2 SV=2	0	99	APEEHPVLLTEAPLNPK	Arg-add@N-term	cleaved V-A@N-term	2010.08	671.033	2010.09	671.037	3	18
90.36	73.33	Q6QAQ1	ACTB_PIG	Actin, cytoplasmic 1 OS=Sus scrofa GN=ACTB PE=2 SV=2	0	99	APEEHPVLLTEAPLNPK		cleaved V-A@N-term	1853.99	928	1853.99	928.002	2	12
90.36	73.33	Q6QAQ1	ACTB_PIG	Actin, cytoplasmic 1 OS=Sus scrofa GN=ACTB PE=2 SV=2	0	99	APEEHPVLLTEAPLNPK		cleaved V-A@N-term	1853.99	619.003	1853.99	619.004	3	16
90.36	73.33	Q6QAQ1	ACTB_PIG	Actin, cytoplasmic 1 OS=Sus scrofa GN=ACTB PE=2 SV=2	0	99	APEEHPVLLTEAPLNPK	Arg-add@N-term	cleaved V-A@N-term	2010.08	671.033	2010.09	671.037	3	16
90.36	73.33	Q6QAQ1	ACTB_PIG	Actin, cytoplasmic 1 OS=Sus scrofa GN=ACTB PE=2 SV=2	0	99	APEEHPVLLTEAPLNPK	Arg-add@N-term	cleaved V-A@N-term	2010.08	671.034	2010.09	671.037	3	16
90.36	73.33	Q6QAQ1	ACTB_PIG	Actin, cytoplasmic 1 OS=Sus scrofa GN=ACTB PE=2 SV=2	0	99	APEEHPVLLTEAPLNPK		cleaved V-A@N-term	1853.99	928.002	1853.99	928.002	2	13
90.36	73.33	Q6QAQ1	ACTB_PIG	Actin, cytoplasmic 1 OS=Sus scrofa GN=ACTB PE=2 SV=2	0	99	APEEHPVLLTEAPLNPK	Arg-add@N-term	cleaved V-A@N-term	2010.08	671.034	2010.09	671.037	3	16
90.36	73.33	Q6QAQ1	ACTB_PIG	Actin, cytoplasmic 1 OS=Sus scrofa GN=ACTB PE=2 SV=2	0	99	APEEHPVLLTEAPLNPK	Arg-add@N-term	cleaved V-A@N-term	2010.08	671.033	2010.09	671.037	3	16
90.36	73.33	Q6QAQ1	ACTB_PIG	Actin, cytoplasmic 1 OS=Sus scrofa GN=ACTB PE=2 SV=2	0	99	APEEHPVLLTEAPLNPK		cleaved V-A@N-term	1853.99	619.003	1853.99	619.004	3	13
90.36	73.33	Q6QAQ1	ACTB_PIG	Actin, cytoplasmic 1 OS=Sus scrofa GN=ACTB PE=2 SV=2	0	99	APEEHPVLLTEAPLNPK		cleaved V-A@N-term	1854.99	619.337	1853.99	619.004	3	14
90.36	73.33	Q6QAQ1	ACTB_PIG	Actin, cytoplasmic 1 OS=Sus scrofa GN=ACTB PE=2 SV=2	0	99	APEEHPVLLTEAPLNPK	Carbamyl@N-term; Oxidation(P)@6	cleaved V-A@N-term	1912.99	638.671	1912.99	638.67	3	15
90.36	73.33	Q6QAQ1	ACTB_PIG	Actin, cytoplasmic 1 OS=Sus scrofa GN=ACTB PE=2 SV=2	0	99	APEEHPVLLTEAPLNPK		cleaved V-A@N-term	1853.99	619.004	1853.99	619.004	3	14
90.36	73.33	Q6QAQ1	ACTB_PIG	Actin, cytoplasmic 1 OS=Sus scrofa GN=ACTB PE=2 SV=2	0	99	APEEHPVLLTEAPLNPK		cleaved V-A@N-term	1852.97	927.495	1853.99	928.002	2	12
90.36	73.33	Q6QAQ1	ACTB_PIG	Actin, cytoplasmic 1 OS=Sus scrofa GN=ACTB PE=2 SV=2	0	99	APEEHPVLLTEAPLNPK	Arg-add@N-term	cleaved V-A@N-term	2010.08	671.034	2010.09	671.037	3	13
90.36	73.33	Q6QAQ1	ACTB_PIG	Actin, cytoplasmic 1 OS=Sus scrofa GN=ACTB PE=2 SV=2	0	98.41	APEEHPVLLTEAPLNPK		cleaved V-A@N-term	1853.99	619.004	1853.99	619.004	3	12
90.36	73.33	Q6QAQ1	ACTB_PIG	Actin, cytoplasmic 1 OS=Sus scrofa GN=ACTB PE=2 SV=2	0	97.85	APEEHPVLLTEAPLNPK		cleaved V-A@N-term	1853.99	928	1853.99	928.002	2	10
90.36	73.33	Q6QAQ1	ACTB_PIG	Actin, cytoplasmic 1 OS=Sus scrofa GN=ACTB PE=2 SV=2	0	96.83	APEEHPVLLTEAPLNPK	Arg-add@N-term	cleaved V-A@N-term	2010.08	671.034	2010.09	671.037	3	14
90.36	73.33	Q6QAQ1	ACTB_PIG	Actin, cytoplasmic 1 OS=Sus scrofa GN=ACTB PE=2 SV=2	0	90.12	APEEHPVLLTEAPLNPK	Arg-add@N-term	cleaved V-A@N-term	2010.08	671.034	2010.09	671.037	3	13
90.36	73.33	Q6QAQ1	ACTB_PIG	Actin, cytoplasmic 1 OS=Sus scrofa GN=ACTB PE=2 SV=2	0	86.57	APEEHPVLLTEAPLNPK		cleaved V-A@N-term	1854.99	619.337	1853.99	619.004	3	10
90.36	73.33	Q6QAQ1	ACTB_PIG	Actin, cytoplasmic 1 OS=Sus scrofa GN=ACTB PE=2 SV=2	0	81.98	APEEHPVLLTEAPLNPK	Arg-add@N-term	cleaved V-A@N-term	2010.08	671.035	2010.09	671.037	3	11
90.36	73.33	Q6QAQ1	ACTB_PIG	Actin, cytoplasmic 1 OS=Sus scrofa GN=ACTB PE=2 SV=2	0	70.11	APEEHPVLLTEAPLNPK	Carboxymethyl@N-term	cleaved V-A@N-term	1911.98	638.333	1911.99	638.339	3	9
90.36	73.33	Q6QAQ1	ACTB_PIG	Actin, cytoplasmic 1 OS=Sus scrofa GN=ACTB PE=2 SV=2	0	65.86	APEEHPVLLTEAPLNPK	Arg-add@N-term	cleaved V-A@N-term	2010.08	671.034	2010.09	671.037	3	9
90.36	73.33	Q6QAQ1	ACTB_PIG	Actin, cytoplasmic 1 OS=Sus scrofa GN=ACTB PE=2 SV=2	0	56.94	APEEHPVLLTEAPLNPK	Carbamyl@N-term; Oxidation(P)@6	cleaved V-A@N-term	1912.98	638.669	1912.99	638.67	3	13
90.36	73.33	Q6QAQ1	ACTB_PIG	Actin, cytoplasmic 1 OS=Sus scrofa GN=ACTB PE=2 SV=2	0	51.14	APEEHPVLLTEAPLNPK	Arg-add@N-term	cleaved V-A@N-term	2010.08	671.034	2010.09	671.037	3	12
90.36	73.33	Q6QAQ1	ACTB_PIG	Actin, cytoplasmic 1 OS=Sus scrofa GN=ACTB PE=2 SV=2	0	45.56	APEEHPVLLTEAPLNPK	Deamidated(N)@15	cleaved V-A@N-term	1854.98	619.335	1854.97	619.332	3	10
90.36	73.33	Q6QAQ1	ACTB_PIG	Actin, cytoplasmic 1 OS=Sus scrofa GN=ACTB PE=2 SV=2	0	70.1	ASGRTTGIVMDSGDGVTHTVPIYEGYALPHAILR	Phospho(S)@12	cleaved Y-A@N-term; missed R-T@4	3633.85	909.469	3633.77	909.449	4	12
90.36	73.33	Q6QAQ1	ACTB_PIG	Actin, cytoplasmic 1 OS=Sus scrofa GN=ACTB PE=2 SV=2	0	75.55	AVFPSIVG		cleaved G-R@C-term	788.442	395.228	788.443	395.229	2	8
90.36	73.33	Q6QAQ1	ACTB_PIG	Actin, cytoplasmic 1 OS=Sus scrofa GN=ACTB PE=2 SV=2	0	75.17	AVFPSIVG		cleaved G-R@C-term	788.442	395.228	788.443	395.229	2	8
90.36	73.33	Q6QAQ1	ACTB_PIG	Actin, cytoplasmic 1 OS=Sus scrofa GN=ACTB PE=2 SV=2	0	71.93	AVFPSIVG		cleaved G-R@C-term	788.441	395.228	788.443	395.229	2	10
90.36	73.33	Q6QAQ1	ACTB_PIG	Actin, cytoplasmic 1 OS=Sus scrofa GN=ACTB PE=2 SV=2	0	70.52	AVFPSIVG		cleaved G-R@C-term	788.442	395.228	788.443	395.229	2	9
90.36	73.33	Q6QAQ1	ACTB_PIG	Actin, cytoplasmic 1 OS=Sus scrofa GN=ACTB PE=2 SV=2	0	99	AVFPSIVGR		cleaved R-P@C-term	944.543	473.279	944.544	473.279	2	7
90.36	73.33	Q6QAQ1	ACTB_PIG	Actin, cytoplasmic 1 OS=Sus scrofa GN=ACTB PE=2 SV=2	0	99	AVFPSIVGR		cleaved R-P@C-term	944.543	473.279	944.544	473.279	2	11
90.36	73.33	Q6QAQ1	ACTB_PIG	Actin, cytoplasmic 1 OS=Sus scrofa GN=ACTB PE=2 SV=2	0	99	AVFPSIVGR		cleaved R-P@C-term	944.543	473.279	944.544	473.279	2	12
90.36	73.33	Q6QAQ1	ACTB_PIG	Actin, cytoplasmic 1 OS=Sus scrofa GN=ACTB PE=2 SV=2	0	99	AVFPSIVGR		cleaved R-P@C-term	944.543	473.279	944.544	473.279	2	10
90.36	73.33	Q6QAQ1	ACTB_PIG	Actin, cytoplasmic 1 OS=Sus scrofa GN=ACTB PE=2 SV=2	0	99	AVFPSIVGR		cleaved R-P@C-term	944.542	473.279	944.544	473.279	2	8
90.36	73.33	Q6QAQ1	ACTB_PIG	Actin, cytoplasmic 1 OS=Sus scrofa GN=ACTB PE=2 SV=2	0	99	AVFPSIVGR		cleaved R-P@C-term	944.544	473.279	944.544	473.279	2	10
90.36	73.33	Q6QAQ1	ACTB_PIG	Actin, cytoplasmic 1 OS=Sus scrofa GN=ACTB PE=2 SV=2	0	99	AVFPSIVGR		cleaved R-P@C-term	944.543	473.279	944.544	473.279	2	5
90.36	73.33	Q6QAQ1	ACTB_PIG	Actin, cytoplasmic 1 OS=Sus scrofa GN=ACTB PE=2 SV=2	0	99	AVFPSIVGR		cleaved R-P@C-term	944.539	473.277	944.544	473.279	2	4
90.36	73.33	Q6QAQ1	ACTB_PIG	Actin, cytoplasmic 1 OS=Sus scrofa GN=ACTB PE=2 SV=2	0	99	AVFPSIVGR		cleaved R-P@C-term	944.539	473.277	944.544	473.279	2	6
90.36	73.33	Q6QAQ1	ACTB_PIG	Actin, cytoplasmic 1 OS=Sus scrofa GN=ACTB PE=2 SV=2	0	99	AVFPSIVGR		cleaved R-P@C-term	944.544	473.279	944.544	473.279	2	13
90.36	73.33	Q6QAQ1	ACTB_PIG	Actin, cytoplasmic 1 OS=Sus scrofa GN=ACTB PE=2 SV=2	0	99	AVFPSIVGR		cleaved R-P@C-term	944.544	473.279	944.544	473.279	2	13
90.36	73.33	Q6QAQ1	ACTB_PIG	Actin, cytoplasmic 1 OS=Sus scrofa GN=ACTB PE=2 SV=2	0	99	AVFPSIVGR		cleaved R-P@C-term	944.544	473.279	944.544	473.279	2	13
90.36	73.33	Q6QAQ1	ACTB_PIG	Actin, cytoplasmic 1 OS=Sus scrofa GN=ACTB PE=2 SV=2	0	99	AVFPSIVGR		cleaved R-P@C-term	944.544	473.279	944.544	473.279	2	12
90.36	73.33	Q6QAQ1	ACTB_PIG	Actin, cytoplasmic 1 OS=Sus scrofa GN=ACTB PE=2 SV=2	0	99	AVFPSIVGR		cleaved R-P@C-term	944.543	473.279	944.544	473.279	2	10
90.36	73.33	Q6QAQ1	ACTB_PIG	Actin, cytoplasmic 1 OS=Sus scrofa GN=ACTB PE=2 SV=2	0	99	AVFPSIVGR		cleaved R-P@C-term	944.545	473.28	944.544	473.279	2	10
90.36	73.33	Q6QAQ1	ACTB_PIG	Actin, cytoplasmic 1 OS=Sus scrofa GN=ACTB PE=2 SV=2	0	99	AVFPSIVGR		cleaved R-P@C-term	944.542	473.278	944.544	473.279	2	7
90.36	73.33	Q6QAQ1	ACTB_PIG	Actin, cytoplasmic 1 OS=Sus scrofa GN=ACTB PE=2 SV=2	0	99	AVFPSIVGR		cleaved R-P@C-term	944.543	473.279	944.544	473.279	2	5
90.36	73.33	Q6QAQ1	ACTB_PIG	Actin, cytoplasmic 1 OS=Sus scrofa GN=ACTB PE=2 SV=2	0	99	AVFPSIVGR		cleaved R-P@C-term	944.544	473.279	944.544	473.279	2	7
90.36	73.33	Q6QAQ1	ACTB_PIG	Actin, cytoplasmic 1 OS=Sus scrofa GN=ACTB PE=2 SV=2	0	99	AVFPSIVGR		cleaved R-P@C-term	944.544	473.279	944.544	473.279	2	10
90.36	73.33	Q6QAQ1	ACTB_PIG	Actin, cytoplasmic 1 OS=Sus scrofa GN=ACTB PE=2 SV=2	0	99	AVFPSIVGR		cleaved R-P@C-term	944.543	473.279	944.544	473.279	2	9
90.36	73.33	Q6QAQ1	ACTB_PIG	Actin, cytoplasmic 1 OS=Sus scrofa GN=ACTB PE=2 SV=2	0	99	AVFPSIVGR		cleaved R-P@C-term	944.543	473.279	944.544	473.279	2	9
90.36	73.33	Q6QAQ1	ACTB_PIG	Actin, cytoplasmic 1 OS=Sus scrofa GN=ACTB PE=2 SV=2	0	99	AVFPSIVGR		cleaved R-P@C-term	944.546	473.28	944.544	473.279	2	13
90.36	73.33	Q6QAQ1	ACTB_PIG	Actin, cytoplasmic 1 OS=Sus scrofa GN=ACTB PE=2 SV=2	0	99	AVFPSIVGR		cleaved R-P@C-term	944.549	473.282	944.544	473.279	2	7
90.36	73.33	Q6QAQ1	ACTB_PIG	Actin, cytoplasmic 1 OS=Sus scrofa GN=ACTB PE=2 SV=2	0	99	AVFPSIVGR		cleaved R-P@C-term	944.544	473.279	944.544	473.279	2	9
90.36	73.33	Q6QAQ1	ACTB_PIG	Actin, cytoplasmic 1 OS=Sus scrofa GN=ACTB PE=2 SV=2	0	99	AVFPSIVGR		cleaved R-P@C-term	944.543	473.279	944.544	473.279	2	9
90.36	73.33	Q6QAQ1	ACTB_PIG	Actin, cytoplasmic 1 OS=Sus scrofa GN=ACTB PE=2 SV=2	0	99	AVFPSIVGR		cleaved R-P@C-term	944.544	473.279	944.544	473.279	2	12
90.36	73.33	Q6QAQ1	ACTB_PIG	Actin, cytoplasmic 1 OS=Sus scrofa GN=ACTB PE=2 SV=2	0	99	AVFPSIVGR		cleaved R-P@C-term	944.544	473.279	944.544	473.279	2	12
90.36	73.33	Q6QAQ1	ACTB_PIG	Actin, cytoplasmic 1 OS=Sus scrofa GN=ACTB PE=2 SV=2	0	99	AVFPSIVGR		cleaved R-P@C-term	944.545	473.28	944.544	473.279	2	8
90.36	73.33	Q6QAQ1	ACTB_PIG	Actin, cytoplasmic 1 OS=Sus scrofa GN=ACTB PE=2 SV=2	0	99	AVFPSIVGR		cleaved R-P@C-term	944.544	473.279	944.544	473.279	2	9
90.36	73.33	Q6QAQ1	ACTB_PIG	Actin, cytoplasmic 1 OS=Sus scrofa GN=ACTB PE=2 SV=2	0	99	AVFPSIVGR		cleaved R-P@C-term	944.545	473.28	944.544	473.279	2	13
90.36	73.33	Q6QAQ1	ACTB_PIG	Actin, cytoplasmic 1 OS=Sus scrofa GN=ACTB PE=2 SV=2	0	99	AVFPSIVGR		cleaved R-P@C-term	944.545	473.28	944.544	473.279	2	13
90.36	73.33	Q6QAQ1	ACTB_PIG	Actin, cytoplasmic 1 OS=Sus scrofa GN=ACTB PE=2 SV=2	0	99	AVFPSIVGR		cleaved R-P@C-term	944.544	473.279	944.544	473.279	2	10
90.36	73.33	Q6QAQ1	ACTB_PIG	Actin, cytoplasmic 1 OS=Sus scrofa GN=ACTB PE=2 SV=2	0	99	AVFPSIVGR		cleaved R-P@C-term	944.545	473.28	944.544	473.279	2	8
90.36	73.33	Q6QAQ1	ACTB_PIG	Actin, cytoplasmic 1 OS=Sus scrofa GN=ACTB PE=2 SV=2	0	99	AVFPSIVGR		cleaved R-P@C-term	944.543	473.279	944.544	473.279	2	7
90.36	73.33	Q6QAQ1	ACTB_PIG	Actin, cytoplasmic 1 OS=Sus scrofa GN=ACTB PE=2 SV=2	0	99	AVFPSIVGR		cleaved R-P@C-term	944.543	473.279	944.544	473.279	2	11
90.36	73.33	Q6QAQ1	ACTB_PIG	Actin, cytoplasmic 1 OS=Sus scrofa GN=ACTB PE=2 SV=2	0	99	AVFPSIVGR		cleaved R-P@C-term	944.544	473.279	944.544	473.279	2	8
90.36	73.33	Q6QAQ1	ACTB_PIG	Actin, cytoplasmic 1 OS=Sus scrofa GN=ACTB PE=2 SV=2	0	99	AVFPSIVGR		cleaved R-P@C-term	944.544	473.279	944.544	473.279	2	7
90.36	73.33	Q6QAQ1	ACTB_PIG	Actin, cytoplasmic 1 OS=Sus scrofa GN=ACTB PE=2 SV=2	0	99	AVFPSIVGR		cleaved R-P@C-term	944.546	473.28	944.544	473.279	2	12
90.36	73.33	Q6QAQ1	ACTB_PIG	Actin, cytoplasmic 1 OS=Sus scrofa GN=ACTB PE=2 SV=2	0	99	AVFPSIVGR		cleaved R-P@C-term	944.546	473.28	944.544	473.279	2	12
90.36	73.33	Q6QAQ1	ACTB_PIG	Actin, cytoplasmic 1 OS=Sus scrofa GN=ACTB PE=2 SV=2	0	99	AVFPSIVGR		cleaved R-P@C-term	944.546	473.28	944.544	473.279	2	12
90.36	73.33	Q6QAQ1	ACTB_PIG	Actin, cytoplasmic 1 OS=Sus scrofa GN=ACTB PE=2 SV=2	0	99	AVFPSIVGR		cleaved R-P@C-term	944.545	473.28	944.544	473.279	2	12
90.36	73.33	Q6QAQ1	ACTB_PIG	Actin, cytoplasmic 1 OS=Sus scrofa GN=ACTB PE=2 SV=2	0	99	AVFPSIVGR		cleaved R-P@C-term	944.55	473.282	944.544	473.279	2	7
90.36	73.33	Q6QAQ1	ACTB_PIG	Actin, cytoplasmic 1 OS=Sus scrofa GN=ACTB PE=2 SV=2	0	99	AVFPSIVGR		cleaved R-P@C-term	944.545	473.28	944.544	473.279	2	12
90.36	73.33	Q6QAQ1	ACTB_PIG	Actin, cytoplasmic 1 OS=Sus scrofa GN=ACTB PE=2 SV=2	0	99	AVFPSIVGR		cleaved R-P@C-term	944.546	473.28	944.544	473.279	2	8
90.36	73.33	Q6QAQ1	ACTB_PIG	Actin, cytoplasmic 1 OS=Sus scrofa GN=ACTB PE=2 SV=2	0	99	AVFPSIVGR		cleaved R-P@C-term	944.545	473.28	944.544	473.279	2	6
90.36	73.33	Q6QAQ1	ACTB_PIG	Actin, cytoplasmic 1 OS=Sus scrofa GN=ACTB PE=2 SV=2	0	99	AVFPSIVGR		cleaved R-P@C-term	944.542	473.278	944.544	473.279	2	5
90.36	73.33	Q6QAQ1	ACTB_PIG	Actin, cytoplasmic 1 OS=Sus scrofa GN=ACTB PE=2 SV=2	0	99	AVFPSIVGR		cleaved R-P@C-term	944.548	473.281	944.544	473.279	2	7
90.36	73.33	Q6QAQ1	ACTB_PIG	Actin, cytoplasmic 1 OS=Sus scrofa GN=ACTB PE=2 SV=2	0	99	AVFPSIVGR		cleaved R-P@C-term	944.544	473.279	944.544	473.279	2	6
90.36	73.33	Q6QAQ1	ACTB_PIG	Actin, cytoplasmic 1 OS=Sus scrofa GN=ACTB PE=2 SV=2	0	98.98	AVFPSIVGR		cleaved R-P@C-term	944.543	473.279	944.544	473.279	2	4
90.36	73.33	Q6QAQ1	ACTB_PIG	Actin, cytoplasmic 1 OS=Sus scrofa GN=ACTB PE=2 SV=2	0	98.9	AVFPSIVGR		cleaved R-P@C-term	944.544	473.279	944.544	473.279	2	10
90.36	73.33	Q6QAQ1	ACTB_PIG	Actin, cytoplasmic 1 OS=Sus scrofa GN=ACTB PE=2 SV=2	0	98.83	AVFPSIVGR		cleaved R-P@C-term	944.531	473.273	944.544	473.279	2	5
90.36	73.33	Q6QAQ1	ACTB_PIG	Actin, cytoplasmic 1 OS=Sus scrofa GN=ACTB PE=2 SV=2	0	98.44	AVFPSIVGR		cleaved R-P@C-term	944.546	473.28	944.544	473.279	2	8
90.36	73.33	Q6QAQ1	ACTB_PIG	Actin, cytoplasmic 1 OS=Sus scrofa GN=ACTB PE=2 SV=2	0	98.31	AVFPSIVGR		cleaved R-P@C-term	944.545	473.28	944.544	473.279	2	11
90.36	73.33	Q6QAQ1	ACTB_PIG	Actin, cytoplasmic 1 OS=Sus scrofa GN=ACTB PE=2 SV=2	0	98.2	AVFPSIVGR		cleaved R-P@C-term	944.546	473.28	944.544	473.279	2	11
90.36	73.33	Q6QAQ1	ACTB_PIG	Actin, cytoplasmic 1 OS=Sus scrofa GN=ACTB PE=2 SV=2	0	97.42	AVFPSIVGR		cleaved R-P@C-term	944.545	473.28	944.544	473.279	2	11
90.36	73.33	Q6QAQ1	ACTB_PIG	Actin, cytoplasmic 1 OS=Sus scrofa GN=ACTB PE=2 SV=2	0	97.22	AVFPSIVGR		cleaved R-P@C-term	944.544	473.279	944.544	473.279	2	6
90.36	73.33	Q6QAQ1	ACTB_PIG	Actin, cytoplasmic 1 OS=Sus scrofa GN=ACTB PE=2 SV=2	0	96.86	AVFPSIVGR		cleaved R-P@C-term	944.538	473.276	944.544	473.279	2	4
90.36	73.33	Q6QAQ1	ACTB_PIG	Actin, cytoplasmic 1 OS=Sus scrofa GN=ACTB PE=2 SV=2	0	96.79	AVFPSIVGR		cleaved R-P@C-term	944.543	473.279	944.544	473.279	2	8
90.36	73.33	Q6QAQ1	ACTB_PIG	Actin, cytoplasmic 1 OS=Sus scrofa GN=ACTB PE=2 SV=2	0	96.7	AVFPSIVGR		cleaved R-P@C-term	944.545	473.28	944.544	473.279	2	11
90.36	73.33	Q6QAQ1	ACTB_PIG	Actin, cytoplasmic 1 OS=Sus scrofa GN=ACTB PE=2 SV=2	0	96.31	AVFPSIVGR		cleaved R-P@C-term	944.542	473.278	944.544	473.279	2	4
90.36	73.33	Q6QAQ1	ACTB_PIG	Actin, cytoplasmic 1 OS=Sus scrofa GN=ACTB PE=2 SV=2	0	96.02	AVFPSIVGR		cleaved R-P@C-term	944.544	473.279	944.544	473.279	2	4
90.36	73.33	Q6QAQ1	ACTB_PIG	Actin, cytoplasmic 1 OS=Sus scrofa GN=ACTB PE=2 SV=2	0	95.98	AVFPSIVGR		cleaved R-P@C-term	944.543	473.279	944.544	473.279	2	10
90.36	73.33	Q6QAQ1	ACTB_PIG	Actin, cytoplasmic 1 OS=Sus scrofa GN=ACTB PE=2 SV=2	0	94.9	AVFPSIVGR		cleaved R-P@C-term	944.544	473.279	944.544	473.279	2	7
90.36	73.33	Q6QAQ1	ACTB_PIG	Actin, cytoplasmic 1 OS=Sus scrofa GN=ACTB PE=2 SV=2	0	94.68	AVFPSIVGR		cleaved R-P@C-term	944.545	473.28	944.544	473.279	2	9
90.36	73.33	Q6QAQ1	ACTB_PIG	Actin, cytoplasmic 1 OS=Sus scrofa GN=ACTB PE=2 SV=2	0	94.59	AVFPSIVGR		cleaved R-P@C-term	944.545	473.28	944.544	473.279	2	8
90.36	73.33	Q6QAQ1	ACTB_PIG	Actin, cytoplasmic 1 OS=Sus scrofa GN=ACTB PE=2 SV=2	0	93.56	AVFPSIVGR		cleaved R-P@C-term	944.539	473.277	944.544	473.279	2	7
90.36	73.33	Q6QAQ1	ACTB_PIG	Actin, cytoplasmic 1 OS=Sus scrofa GN=ACTB PE=2 SV=2	0	90.83	AVFPSIVGR		cleaved R-P@C-term	944.519	473.267	944.544	473.279	2	6
90.36	73.33	Q6QAQ1	ACTB_PIG	Actin, cytoplasmic 1 OS=Sus scrofa GN=ACTB PE=2 SV=2	0	89.18	AVFPSIVGR		cleaved R-P@C-term	944.544	473.279	944.544	473.279	2	6
90.36	73.33	Q6QAQ1	ACTB_PIG	Actin, cytoplasmic 1 OS=Sus scrofa GN=ACTB PE=2 SV=2	0	86.13	AVFPSIVGR		cleaved R-P@C-term	944.545	473.28	944.544	473.279	2	6
90.36	73.33	Q6QAQ1	ACTB_PIG	Actin, cytoplasmic 1 OS=Sus scrofa GN=ACTB PE=2 SV=2	0	86.13	AVFPSIVGR		cleaved R-P@C-term	944.545	473.28	944.544	473.279	2	10
90.36	73.33	Q6QAQ1	ACTB_PIG	Actin, cytoplasmic 1 OS=Sus scrofa GN=ACTB PE=2 SV=2	0	85.73	AVFPSIVGR		cleaved R-P@C-term	944.546	473.28	944.544	473.279	2	6
90.36	73.33	Q6QAQ1	ACTB_PIG	Actin, cytoplasmic 1 OS=Sus scrofa GN=ACTB PE=2 SV=2	0	84.17	AVFPSIVGR		cleaved R-P@C-term	944.544	473.279	944.544	473.279	2	5
90.36	73.33	Q6QAQ1	ACTB_PIG	Actin, cytoplasmic 1 OS=Sus scrofa GN=ACTB PE=2 SV=2	0	83.8	AVFPSIVGR		cleaved R-P@C-term	944.542	473.278	944.544	473.279	2	3
90.36	73.33	Q6QAQ1	ACTB_PIG	Actin, cytoplasmic 1 OS=Sus scrofa GN=ACTB PE=2 SV=2	0	83.8	AVFPSIVGR		cleaved R-P@C-term	944.541	473.278	944.544	473.279	2	3
90.36	73.33	Q6QAQ1	ACTB_PIG	Actin, cytoplasmic 1 OS=Sus scrofa GN=ACTB PE=2 SV=2	0	83.8	AVFPSIVGR		cleaved R-P@C-term	944.538	473.276	944.544	473.279	2	3
90.36	73.33	Q6QAQ1	ACTB_PIG	Actin, cytoplasmic 1 OS=Sus scrofa GN=ACTB PE=2 SV=2	0	83.54	AVFPSIVGR		cleaved R-P@C-term	944.543	473.279	944.544	473.279	2	7
90.36	73.33	Q6QAQ1	ACTB_PIG	Actin, cytoplasmic 1 OS=Sus scrofa GN=ACTB PE=2 SV=2	0	83.54	AVFPSIVGR		cleaved R-P@C-term	944.543	473.279	944.544	473.279	2	6
90.36	73.33	Q6QAQ1	ACTB_PIG	Actin, cytoplasmic 1 OS=Sus scrofa GN=ACTB PE=2 SV=2	0	82.91	AVFPSIVGR		cleaved R-P@C-term	944.543	473.279	944.544	473.279	2	9
90.36	73.33	Q6QAQ1	ACTB_PIG	Actin, cytoplasmic 1 OS=Sus scrofa GN=ACTB PE=2 SV=2	0	80.5	AVFPSIVGR		cleaved R-P@C-term	944.546	473.28	944.544	473.279	2	7
90.36	73.33	Q6QAQ1	ACTB_PIG	Actin, cytoplasmic 1 OS=Sus scrofa GN=ACTB PE=2 SV=2	0	78.61	AVFPSIVGR		cleaved R-P@C-term	944.543	473.279	944.544	473.279	2	10
90.36	73.33	Q6QAQ1	ACTB_PIG	Actin, cytoplasmic 1 OS=Sus scrofa GN=ACTB PE=2 SV=2	0	77.6	AVFPSIVGR		cleaved R-P@C-term	944.545	473.28	944.544	473.279	2	10
90.36	73.33	Q6QAQ1	ACTB_PIG	Actin, cytoplasmic 1 OS=Sus scrofa GN=ACTB PE=2 SV=2	0	75.5	AVFPSIVGR		cleaved R-P@C-term	944.543	473.279	944.544	473.279	2	7
90.36	73.33	Q6QAQ1	ACTB_PIG	Actin, cytoplasmic 1 OS=Sus scrofa GN=ACTB PE=2 SV=2	0	74.29	AVFPSIVGR		cleaved R-P@C-term	944.545	473.28	944.544	473.279	2	7
90.36	73.33	Q6QAQ1	ACTB_PIG	Actin, cytoplasmic 1 OS=Sus scrofa GN=ACTB PE=2 SV=2	0	71.47	AVFPSIVGR		cleaved R-P@C-term	944.541	473.278	944.544	473.279	2	3
90.36	73.33	Q6QAQ1	ACTB_PIG	Actin, cytoplasmic 1 OS=Sus scrofa GN=ACTB PE=2 SV=2	0	67.61	AVFPSIVGR		cleaved R-P@C-term	944.537	473.276	944.544	473.279	2	3
90.36	73.33	Q6QAQ1	ACTB_PIG	Actin, cytoplasmic 1 OS=Sus scrofa GN=ACTB PE=2 SV=2	0	62.82	AVFPSIVGR		cleaved R-P@C-term	944.527	473.271	944.544	473.279	2	5
90.36	73.33	Q6QAQ1	ACTB_PIG	Actin, cytoplasmic 1 OS=Sus scrofa GN=ACTB PE=2 SV=2	0	50.43	AVFPSIVGR		cleaved R-P@C-term	944.544	473.279	944.544	473.279	2	5
90.36	73.33	Q6QAQ1	ACTB_PIG	Actin, cytoplasmic 1 OS=Sus scrofa GN=ACTB PE=2 SV=2	0	45.64	AVFPSIVGR		cleaved R-P@C-term	944.538	473.276	944.544	473.279	2	4
90.36	73.33	Q6QAQ1	ACTB_PIG	Actin, cytoplasmic 1 OS=Sus scrofa GN=ACTB PE=2 SV=2	0	45.64	AVFPSIVGR		cleaved R-P@C-term	944.541	473.278	944.544	473.279	2	4
90.36	73.33	Q6QAQ1	ACTB_PIG	Actin, cytoplasmic 1 OS=Sus scrofa GN=ACTB PE=2 SV=2	0	43.11	AVFPSIVGR		cleaved R-P@C-term	944.548	473.281	944.544	473.279	2	5
90.36	73.33	Q6QAQ1	ACTB_PIG	Actin, cytoplasmic 1 OS=Sus scrofa GN=ACTB PE=2 SV=2	0	34.52	AVFPSIVGR		cleaved R-P@C-term	944.546	473.28	944.544	473.279	2	6
90.36	73.33	Q6QAQ1	ACTB_PIG	Actin, cytoplasmic 1 OS=Sus scrofa GN=ACTB PE=2 SV=2	0	28.53	AVFPSIVGR		cleaved R-P@C-term	944.543	473.279	944.544	473.279	2	5
90.36	73.33	Q6QAQ1	ACTB_PIG	Actin, cytoplasmic 1 OS=Sus scrofa GN=ACTB PE=2 SV=2	0	99	AVFPSIVGRP		cleaved P-R@C-term	1041.6	521.806	1041.6	521.806	2	11
90.36	73.33	Q6QAQ1	ACTB_PIG	Actin, cytoplasmic 1 OS=Sus scrofa GN=ACTB PE=2 SV=2	0	99	AVFPSIVGRP		cleaved P-R@C-term	1041.59	521.804	1041.6	521.806	2	9
90.36	73.33	Q6QAQ1	ACTB_PIG	Actin, cytoplasmic 1 OS=Sus scrofa GN=ACTB PE=2 SV=2	0	99	AVFPSIVGRP		cleaved P-R@C-term	1041.6	521.805	1041.6	521.806	2	12
90.36	73.33	Q6QAQ1	ACTB_PIG	Actin, cytoplasmic 1 OS=Sus scrofa GN=ACTB PE=2 SV=2	0	99	AVFPSIVGRP		cleaved P-R@C-term	1041.6	521.805	1041.6	521.806	2	12
90.36	73.33	Q6QAQ1	ACTB_PIG	Actin, cytoplasmic 1 OS=Sus scrofa GN=ACTB PE=2 SV=2	0	99	AVFPSIVGRP		cleaved P-R@C-term	1041.6	521.806	1041.6	521.806	2	7
90.36	73.33	Q6QAQ1	ACTB_PIG	Actin, cytoplasmic 1 OS=Sus scrofa GN=ACTB PE=2 SV=2	0	99	AVFPSIVGRP		cleaved P-R@C-term	1041.6	521.806	1041.6	521.806	2	11
90.36	73.33	Q6QAQ1	ACTB_PIG	Actin, cytoplasmic 1 OS=Sus scrofa GN=ACTB PE=2 SV=2	0	97.18	AVFPSIVGRP		cleaved P-R@C-term	1041.6	521.805	1041.6	521.806	2	9
90.36	73.33	Q6QAQ1	ACTB_PIG	Actin, cytoplasmic 1 OS=Sus scrofa GN=ACTB PE=2 SV=2	0	91.39	AVFPSIVGRP		cleaved P-R@C-term	1041.6	521.805	1041.6	521.806	2	9
90.36	73.33	Q6QAQ1	ACTB_PIG	Actin, cytoplasmic 1 OS=Sus scrofa GN=ACTB PE=2 SV=2	0	91.2	AVFPSIVGRP		cleaved P-R@C-term	1041.6	521.805	1041.6	521.806	2	8
90.36	73.33	Q6QAQ1	ACTB_PIG	Actin, cytoplasmic 1 OS=Sus scrofa GN=ACTB PE=2 SV=2	0	90.82	AVFPSIVGRP		cleaved P-R@C-term	1041.6	521.805	1041.6	521.806	2	7
90.36	73.33	Q6QAQ1	ACTB_PIG	Actin, cytoplasmic 1 OS=Sus scrofa GN=ACTB PE=2 SV=2	0	89.22	AVFPSIVGRP		cleaved P-R@C-term	1041.6	521.806	1041.6	521.806	2	8
90.36	73.33	Q6QAQ1	ACTB_PIG	Actin, cytoplasmic 1 OS=Sus scrofa GN=ACTB PE=2 SV=2	0	86.7	AVFPSIVGRP		cleaved P-R@C-term	1041.59	521.804	1041.6	521.806	2	6
90.36	73.33	Q6QAQ1	ACTB_PIG	Actin, cytoplasmic 1 OS=Sus scrofa GN=ACTB PE=2 SV=2	0	84.96	AVFPSIVGRP		cleaved P-R@C-term	1041.6	521.806	1041.6	521.806	2	9
90.36	73.33	Q6QAQ1	ACTB_PIG	Actin, cytoplasmic 1 OS=Sus scrofa GN=ACTB PE=2 SV=2	0	84.29	AVFPSIVGRP		cleaved P-R@C-term	1041.6	521.806	1041.6	521.806	2	10
90.36	73.33	Q6QAQ1	ACTB_PIG	Actin, cytoplasmic 1 OS=Sus scrofa GN=ACTB PE=2 SV=2	0	82.75	AVFPSIVGRP		cleaved P-R@C-term	1041.6	521.806	1041.6	521.806	2	8
90.36	73.33	Q6QAQ1	ACTB_PIG	Actin, cytoplasmic 1 OS=Sus scrofa GN=ACTB PE=2 SV=2	0	68.92	AVFPSIVGRP		cleaved P-R@C-term	1041.6	521.805	1041.6	521.806	2	7
90.36	73.33	Q6QAQ1	ACTB_PIG	Actin, cytoplasmic 1 OS=Sus scrofa GN=ACTB PE=2 SV=2	0	99	AVFPSIVGRPR			1197.7	400.24	1197.7	400.24	3	12
90.36	73.33	Q6QAQ1	ACTB_PIG	Actin, cytoplasmic 1 OS=Sus scrofa GN=ACTB PE=2 SV=2	0	99	AVFPSIVGRPR			1197.7	599.856	1197.7	599.856	2	16
90.36	73.33	Q6QAQ1	ACTB_PIG	Actin, cytoplasmic 1 OS=Sus scrofa GN=ACTB PE=2 SV=2	0	99	AVFPSIVGRPR			1197.7	599.856	1197.7	599.856	2	18
90.36	73.33	Q6QAQ1	ACTB_PIG	Actin, cytoplasmic 1 OS=Sus scrofa GN=ACTB PE=2 SV=2	0	99	AVFPSIVGRPR			1197.7	400.24	1197.7	400.24	3	11
90.36	73.33	Q6QAQ1	ACTB_PIG	Actin, cytoplasmic 1 OS=Sus scrofa GN=ACTB PE=2 SV=2	0	99	AVFPSIVGRPR			1197.7	400.24	1197.7	400.24	3	11
90.36	73.33	Q6QAQ1	ACTB_PIG	Actin, cytoplasmic 1 OS=Sus scrofa GN=ACTB PE=2 SV=2	0	99	AVFPSIVGRPR			1197.7	400.24	1197.7	400.24	3	12
90.36	73.33	Q6QAQ1	ACTB_PIG	Actin, cytoplasmic 1 OS=Sus scrofa GN=ACTB PE=2 SV=2	0	99	AVFPSIVGRPR			1197.7	400.24	1197.7	400.24	3	12
90.36	73.33	Q6QAQ1	ACTB_PIG	Actin, cytoplasmic 1 OS=Sus scrofa GN=ACTB PE=2 SV=2	0	99	AVFPSIVGRPR			1197.7	400.24	1197.7	400.24	3	12
90.36	73.33	Q6QAQ1	ACTB_PIG	Actin, cytoplasmic 1 OS=Sus scrofa GN=ACTB PE=2 SV=2	0	99	AVFPSIVGRPR			1197.7	400.24	1197.7	400.24	3	12
90.36	73.33	Q6QAQ1	ACTB_PIG	Actin, cytoplasmic 1 OS=Sus scrofa GN=ACTB PE=2 SV=2	0	99	AVFPSIVGRPR			1197.7	400.24	1197.7	400.24	3	12
90.36	73.33	Q6QAQ1	ACTB_PIG	Actin, cytoplasmic 1 OS=Sus scrofa GN=ACTB PE=2 SV=2	0	99	AVFPSIVGRPR			1197.7	400.24	1197.7	400.24	3	12
90.36	73.33	Q6QAQ1	ACTB_PIG	Actin, cytoplasmic 1 OS=Sus scrofa GN=ACTB PE=2 SV=2	0	99	AVFPSIVGRPR			1197.7	400.24	1197.7	400.24	3	10
90.36	73.33	Q6QAQ1	ACTB_PIG	Actin, cytoplasmic 1 OS=Sus scrofa GN=ACTB PE=2 SV=2	0	99	AVFPSIVGRPR			1197.7	400.24	1197.7	400.24	3	12
90.36	73.33	Q6QAQ1	ACTB_PIG	Actin, cytoplasmic 1 OS=Sus scrofa GN=ACTB PE=2 SV=2	0	99	AVFPSIVGRPR			1197.7	400.24	1197.7	400.24	3	12
90.36	73.33	Q6QAQ1	ACTB_PIG	Actin, cytoplasmic 1 OS=Sus scrofa GN=ACTB PE=2 SV=2	0	99	AVFPSIVGRPR			1197.7	400.24	1197.7	400.24	3	11
90.36	73.33	Q6QAQ1	ACTB_PIG	Actin, cytoplasmic 1 OS=Sus scrofa GN=ACTB PE=2 SV=2	0	99	AVFPSIVGRPR			1197.7	400.241	1197.7	400.24	3	12
90.36	73.33	Q6QAQ1	ACTB_PIG	Actin, cytoplasmic 1 OS=Sus scrofa GN=ACTB PE=2 SV=2	0	99	AVFPSIVGRPR			1197.7	400.24	1197.7	400.24	3	8
90.36	73.33	Q6QAQ1	ACTB_PIG	Actin, cytoplasmic 1 OS=Sus scrofa GN=ACTB PE=2 SV=2	0	99	AVFPSIVGRPR			1197.7	400.24	1197.7	400.24	3	8
90.36	73.33	Q6QAQ1	ACTB_PIG	Actin, cytoplasmic 1 OS=Sus scrofa GN=ACTB PE=2 SV=2	0	99	AVFPSIVGRPR			1197.7	400.241	1197.7	400.24	3	12
90.36	73.33	Q6QAQ1	ACTB_PIG	Actin, cytoplasmic 1 OS=Sus scrofa GN=ACTB PE=2 SV=2	0	99	AVFPSIVGRPR			1197.7	400.24	1197.7	400.24	3	9
90.36	73.33	Q6QAQ1	ACTB_PIG	Actin, cytoplasmic 1 OS=Sus scrofa GN=ACTB PE=2 SV=2	0	98.95	AVFPSIVGRPR			1197.7	599.856	1197.7	599.856	2	9
90.36	73.33	Q6QAQ1	ACTB_PIG	Actin, cytoplasmic 1 OS=Sus scrofa GN=ACTB PE=2 SV=2	0	96.1	AVFPSIVGRPR			1197.7	400.24	1197.7	400.24	3	10
90.36	73.33	Q6QAQ1	ACTB_PIG	Actin, cytoplasmic 1 OS=Sus scrofa GN=ACTB PE=2 SV=2	0	88.78	AVFPSIVGRPR			1197.7	599.856	1197.7	599.856	2	10
90.36	73.33	Q6QAQ1	ACTB_PIG	Actin, cytoplasmic 1 OS=Sus scrofa GN=ACTB PE=2 SV=2	0	86.13	AVFPSIVGRPR			1197.7	400.241	1197.7	400.24	3	10
90.36	73.33	Q6QAQ1	ACTB_PIG	Actin, cytoplasmic 1 OS=Sus scrofa GN=ACTB PE=2 SV=2	0	82.99	AVFPSIVGRPR			1197.7	400.24	1197.7	400.24	3	9
90.36	73.33	Q6QAQ1	ACTB_PIG	Actin, cytoplasmic 1 OS=Sus scrofa GN=ACTB PE=2 SV=2	0	62.89	AVFPSIVGRPR			1197.7	599.856	1197.7	599.856	2	9
90.36	73.33	Q6QAQ1	ACTB_PIG	Actin, cytoplasmic 1 OS=Sus scrofa GN=ACTB PE=2 SV=2	0	33.78	AVFPSIVGRPR			1197.7	599.856	1197.7	599.856	2	6
90.36	73.33	Q6QAQ1	ACTB_PIG	Actin, cytoplasmic 1 OS=Sus scrofa GN=ACTB PE=2 SV=2	0	29.79	AVFPSIVGRPR	Deamidated(R)@9		1198.7	400.574	1198.68	400.568	3	9
90.36	73.33	Q6QAQ1	ACTB_PIG	Actin, cytoplasmic 1 OS=Sus scrofa GN=ACTB PE=2 SV=2	0	25.35	AVFPSIVGRPR			1197.68	400.235	1197.7	400.24	3	6
90.36	73.33	Q6QAQ1	ACTB_PIG	Actin, cytoplasmic 1 OS=Sus scrofa GN=ACTB PE=2 SV=2	0	53.54	CDVDIR	Carboxymethyl(C)@1; Dehydrated(D)@2		759.329	380.672	759.322	380.668	2	6
90.36	73.33	Q6QAQ1	ACTB_PIG	Actin, cytoplasmic 1 OS=Sus scrofa GN=ACTB PE=2 SV=2	0	39.31	CDVDIR	Carboxymethyl(C)@1; Dehydrated(D)@2		759.328	380.671	759.322	380.668	2	7
90.36	73.33	Q6QAQ1	ACTB_PIG	Actin, cytoplasmic 1 OS=Sus scrofa GN=ACTB PE=2 SV=2	0	19.03	CDVDIR	Carboxymethyl(C)@1		777.35	389.682	777.333	389.674	2	4
90.36	73.33	Q6QAQ1	ACTB_PIG	Actin, cytoplasmic 1 OS=Sus scrofa GN=ACTB PE=2 SV=2	0	84.05	CPEALFQPSFLGMESCGIHETTFNSIMK	Carboxymethyl(C)@1; Dehydrated(E)@3; Oxidation(M)@13; Carboxymethyl(C)@16		3230.46	1077.83	3230.41	1077.81	3	13
90.36	73.33	Q6QAQ1	ACTB_PIG	Actin, cytoplasmic 1 OS=Sus scrofa GN=ACTB PE=2 SV=2	0	54.57	CPEALFQPSFLGMESCGIHETTFNSIMK	Carboxymethyl(C)@1; Ser->Oxoalanine(S)@9; Carboxymethyl(C)@16		3230.46	1077.83	3230.41	1077.81	3	11
90.36	73.33	Q6QAQ1	ACTB_PIG	Actin, cytoplasmic 1 OS=Sus scrofa GN=ACTB PE=2 SV=2	0	41.19	CPEALFQPSFLGMESCGIHETTFNSIMK	Carboxymethyl(C)@1; Dehydrated(E)@3; Oxidation(M)@13; Carboxymethyl(C)@16		3230.46	1077.83	3230.41	1077.81	3	11
90.36	73.33	Q6QAQ1	ACTB_PIG	Actin, cytoplasmic 1 OS=Sus scrofa GN=ACTB PE=2 SV=2	0	99	DDDIAALVVDNGSGMCK	Protein Terminal Acetyl@N-term; Oxidation(M)@15; Carboxymethyl(C)@16; Amidated@C-term	cleaved M-D@N-term	1836.79	919.402	1836.79	919.401	2	13
90.36	73.33	Q6QAQ1	ACTB_PIG	Actin, cytoplasmic 1 OS=Sus scrofa GN=ACTB PE=2 SV=2	0	99	DDDIAALVVDNGSGMCK	Protein Terminal Acetyl@N-term; Deamidated(N)@11; Carboxymethyl(C)@16; Amidated@C-term	cleaved M-D@N-term	1821.78	911.895	1821.78	911.895	2	18
90.36	73.33	Q6QAQ1	ACTB_PIG	Actin, cytoplasmic 1 OS=Sus scrofa GN=ACTB PE=2 SV=2	0	99	DDDIAALVVDNGSGMCK	Protein Terminal Acetyl@N-term; Carboxymethyl(C)@16; Amidated@C-term	cleaved M-D@N-term	1820.8	911.405	1820.79	911.403	2	19
90.36	73.33	Q6QAQ1	ACTB_PIG	Actin, cytoplasmic 1 OS=Sus scrofa GN=ACTB PE=2 SV=2	0	99	DDDIAALVVDNGSGMCK	Protein Terminal Acetyl@N-term; Deamidated(N)@11; Carboxymethyl(C)@16; Amidated@C-term	cleaved M-D@N-term	1821.78	911.895	1821.78	911.895	2	19
90.36	73.33	Q6QAQ1	ACTB_PIG	Actin, cytoplasmic 1 OS=Sus scrofa GN=ACTB PE=2 SV=2	0	99	DDDIAALVVDNGSGMCK	Protein Terminal Acetyl@N-term; Carboxymethyl(C)@16; Amidated@C-term	cleaved M-D@N-term	1820.8	911.406	1820.79	911.403	2	15
90.36	73.33	Q6QAQ1	ACTB_PIG	Actin, cytoplasmic 1 OS=Sus scrofa GN=ACTB PE=2 SV=2	0	99	DDDIAALVVDNGSGMCK	Protein Terminal Acetyl@N-term; Carboxymethyl(C)@16; Amidated@C-term	cleaved M-D@N-term	1820.82	911.418	1820.79	911.403	2	18
90.36	73.33	Q6QAQ1	ACTB_PIG	Actin, cytoplasmic 1 OS=Sus scrofa GN=ACTB PE=2 SV=2	0	99	DDDIAALVVDNGSGMCK	Protein Terminal Acetyl@N-term; Carboxymethyl(C)@16; Amidated@C-term	cleaved M-D@N-term	1820.8	911.405	1820.79	911.403	2	13
90.36	73.33	Q6QAQ1	ACTB_PIG	Actin, cytoplasmic 1 OS=Sus scrofa GN=ACTB PE=2 SV=2	0	99	DDDIAALVVDNGSGMCK	Protein Terminal Acetyl@N-term; Carboxymethyl(C)@16; Amidated@C-term	cleaved M-D@N-term	1820.8	911.407	1820.79	911.403	2	14
90.36	73.33	Q6QAQ1	ACTB_PIG	Actin, cytoplasmic 1 OS=Sus scrofa GN=ACTB PE=2 SV=2	0	99	DDDIAALVVDNGSGMCK	Protein Terminal Acetyl@N-term; Carboxymethyl(C)@16	cleaved M-D@N-term	1821.78	911.896	1821.78	911.895	2	10
90.36	73.33	Q6QAQ1	ACTB_PIG	Actin, cytoplasmic 1 OS=Sus scrofa GN=ACTB PE=2 SV=2	0	98.89	DDDIAALVVDNGSGMCK	Protein Terminal Acetyl@N-term; Carboxymethyl(C)@16; Amidated@C-term	cleaved M-D@N-term	1820.79	911.404	1820.79	911.403	2	19
90.36	73.33	Q6QAQ1	ACTB_PIG	Actin, cytoplasmic 1 OS=Sus scrofa GN=ACTB PE=2 SV=2	0	98.89	DDDIAALVVDNGSGMCK	Protein Terminal Acetyl@N-term; Deamidated(N)@11; Carboxymethyl(C)@16; Amidated@C-term	cleaved M-D@N-term	1821.78	911.896	1821.78	911.895	2	18
90.36	73.33	Q6QAQ1	ACTB_PIG	Actin, cytoplasmic 1 OS=Sus scrofa GN=ACTB PE=2 SV=2	0	98.88	DDDIAALVVDNGSGMCK	Protein Terminal Acetyl@N-term; Carboxymethyl(C)@16	cleaved M-D@N-term	1821.77	911.894	1821.78	911.895	2	11
90.36	73.33	Q6QAQ1	ACTB_PIG	Actin, cytoplasmic 1 OS=Sus scrofa GN=ACTB PE=2 SV=2	0	98.87	DDDIAALVVDNGSGMCK	Protein Terminal Acetyl@N-term; Oxidation(M)@15; Carboxymethyl(C)@16; Amidated@C-term	cleaved M-D@N-term	1836.79	919.402	1836.79	919.401	2	17
90.36	73.33	Q6QAQ1	ACTB_PIG	Actin, cytoplasmic 1 OS=Sus scrofa GN=ACTB PE=2 SV=2	0	98.85	DDDIAALVVDNGSGMCK	Protein Terminal Acetyl@N-term; Carboxymethyl(C)@16; Amidated@C-term	cleaved M-D@N-term	1820.8	911.405	1820.79	911.403	2	15
90.36	73.33	Q6QAQ1	ACTB_PIG	Actin, cytoplasmic 1 OS=Sus scrofa GN=ACTB PE=2 SV=2	0	98.84	DDDIAALVVDNGSGMCK	Protein Terminal Acetyl@N-term; Oxidation(M)@15; Carboxymethyl(C)@16; Amidated@C-term	cleaved M-D@N-term	1836.79	919.402	1836.79	919.401	2	14
90.36	73.33	Q6QAQ1	ACTB_PIG	Actin, cytoplasmic 1 OS=Sus scrofa GN=ACTB PE=2 SV=2	0	98.76	DDDIAALVVDNGSGMCK	Protein Terminal Acetyl@N-term; Carboxymethyl(C)@16; Amidated@C-term	cleaved M-D@N-term	1820.81	911.414	1820.79	911.403	2	15
90.36	73.33	Q6QAQ1	ACTB_PIG	Actin, cytoplasmic 1 OS=Sus scrofa GN=ACTB PE=2 SV=2	0	98.69	DDDIAALVVDNGSGMCK	Protein Terminal Acetyl@N-term; Carboxymethyl(C)@16; Amidated@C-term	cleaved M-D@N-term	1820.79	911.404	1820.79	911.403	2	19
90.36	73.33	Q6QAQ1	ACTB_PIG	Actin, cytoplasmic 1 OS=Sus scrofa GN=ACTB PE=2 SV=2	0	98.66	DDDIAALVVDNGSGMCK	Protein Terminal Acetyl@N-term; Carboxymethyl(C)@16; Amidated@C-term	cleaved M-D@N-term	1820.8	911.406	1820.79	911.403	2	11
90.36	73.33	Q6QAQ1	ACTB_PIG	Actin, cytoplasmic 1 OS=Sus scrofa GN=ACTB PE=2 SV=2	0	98.65	DDDIAALVVDNGSGMCK	Protein Terminal Acetyl@N-term; Deamidated(N)@11; Carboxymethyl(C)@16; Amidated@C-term	cleaved M-D@N-term	1821.77	911.894	1821.78	911.895	2	19
90.36	73.33	Q6QAQ1	ACTB_PIG	Actin, cytoplasmic 1 OS=Sus scrofa GN=ACTB PE=2 SV=2	0	98.17	DDDIAALVVDNGSGMCK	Protein Terminal Acetyl@N-term; Carboxymethyl(C)@16	cleaved M-D@N-term	1821.77	911.894	1821.78	911.895	2	13
90.36	73.33	Q6QAQ1	ACTB_PIG	Actin, cytoplasmic 1 OS=Sus scrofa GN=ACTB PE=2 SV=2	0	96.97	DDDIAALVVDNGSGMCK	Protein Terminal Acetyl@N-term; Deamidated(N)@11; Carboxymethyl(C)@16	cleaved M-D@N-term	1822.79	912.404	1822.76	912.387	2	13
90.36	73.33	Q6QAQ1	ACTB_PIG	Actin, cytoplasmic 1 OS=Sus scrofa GN=ACTB PE=2 SV=2	0	96.77	DDDIAALVVDNGSGMCK	Protein Terminal Acetyl@N-term; Methyl(D)@10; Deamidated(N)@11; Carboxymethyl(C)@16	cleaved M-D@N-term	1836.79	919.404	1836.78	919.395	2	11
90.36	73.33	Q6QAQ1	ACTB_PIG	Actin, cytoplasmic 1 OS=Sus scrofa GN=ACTB PE=2 SV=2	0	94.02	DDDIAALVVDNGSGMCK	Protein Terminal Acetyl@N-term; Carboxymethyl(C)@16; Amidated@C-term	cleaved M-D@N-term	1820.8	911.409	1820.79	911.403	2	10
90.36	73.33	Q6QAQ1	ACTB_PIG	Actin, cytoplasmic 1 OS=Sus scrofa GN=ACTB PE=2 SV=2	0	90.34	DDDIAALVVDNGSGMCK	Protein Terminal Acetyl@N-term; Carboxymethyl(C)@16; Amidated@C-term	cleaved M-D@N-term	1820.8	911.406	1820.79	911.403	2	10
90.36	73.33	Q6QAQ1	ACTB_PIG	Actin, cytoplasmic 1 OS=Sus scrofa GN=ACTB PE=2 SV=2	0	88.01	DDDIAALVVDNGSGMCK	Protein Terminal Acetyl@N-term; Carboxymethyl(C)@16	cleaved M-D@N-term	1821.83	911.924	1821.78	911.895	2	11
90.36	73.33	Q6QAQ1	ACTB_PIG	Actin, cytoplasmic 1 OS=Sus scrofa GN=ACTB PE=2 SV=2	0	80.39	DDDIAALVVDNGSGMCK	Protein Terminal Acetyl@N-term; Carboxymethyl(C)@16	cleaved M-D@N-term	1821.78	911.896	1821.78	911.895	2	8
90.36	73.33	Q6QAQ1	ACTB_PIG	Actin, cytoplasmic 1 OS=Sus scrofa GN=ACTB PE=2 SV=2	0	79.35	DDDIAALVVDNGSGMCK	Protein Terminal Acetyl@N-term; Deamidated(N)@11; Carboxymethyl(C)@16	cleaved M-D@N-term	1822.78	912.398	1822.76	912.387	2	10
90.36	73.33	Q6QAQ1	ACTB_PIG	Actin, cytoplasmic 1 OS=Sus scrofa GN=ACTB PE=2 SV=2	0	72.22	DDDIAALVVDNGSGMCK	Protein Terminal Acetyl@N-term; Oxidation(M)@15; Carboxymethyl(C)@16; Amidated@C-term	cleaved M-D@N-term	1836.79	919.401	1836.79	919.401	2	10
90.36	73.33	Q6QAQ1	ACTB_PIG	Actin, cytoplasmic 1 OS=Sus scrofa GN=ACTB PE=2 SV=2	0	64.58	DDDIAALVVDNGSGMCK	Protein Terminal Acetyl@N-term; Carboxymethyl(C)@16; Amidated@C-term	cleaved M-D@N-term	1820.8	911.406	1820.79	911.403	2	10
90.36	73.33	Q6QAQ1	ACTB_PIG	Actin, cytoplasmic 1 OS=Sus scrofa GN=ACTB PE=2 SV=2	0	47.91	DDDIAALVVDNGSGMCK	Protein Terminal Acetyl@N-term; Carboxymethyl(C)@16; Amidated@C-term	cleaved M-D@N-term	1820.79	911.404	1820.79	911.403	2	8
90.36	73.33	Q6QAQ1	ACTB_PIG	Actin, cytoplasmic 1 OS=Sus scrofa GN=ACTB PE=2 SV=2	0	42.1	DDDIAALVVDNGSGMCK	Protein Terminal Acetyl@N-term; Carboxymethyl(C)@16	cleaved M-D@N-term	1821.82	911.917	1821.78	911.895	2	9
90.36	73.33	Q6QAQ1	ACTB_PIG	Actin, cytoplasmic 1 OS=Sus scrofa GN=ACTB PE=2 SV=2	0	73.62	DFEQEMATAASSSSLEK	Carbamyl@N-term	cleaved L-D@N-term	1872.81	625.276	1872.8	625.276	3	10
90.36	73.33	Q6QAQ1	ACTB_PIG	Actin, cytoplasmic 1 OS=Sus scrofa GN=ACTB PE=2 SV=2	0	48.26	DFEQEMATAASSSSLEK	Carbamyl@N-term	cleaved L-D@N-term	1872.81	625.277	1872.8	625.276	3	10
90.36	73.33	Q6QAQ1	ACTB_PIG	Actin, cytoplasmic 1 OS=Sus scrofa GN=ACTB PE=2 SV=2	0	99	DGQVITIGNER		cleaved P-D@N-term	1200.61	601.313	1200.61	601.312	2	12
90.36	73.33	Q6QAQ1	ACTB_PIG	Actin, cytoplasmic 1 OS=Sus scrofa GN=ACTB PE=2 SV=2	0	99	DGQVITIGNER		cleaved P-D@N-term	1200.61	601.312	1200.61	601.312	2	13
90.36	73.33	Q6QAQ1	ACTB_PIG	Actin, cytoplasmic 1 OS=Sus scrofa GN=ACTB PE=2 SV=2	0	99	DGQVITIGNER		cleaved P-D@N-term	1200.61	601.312	1200.61	601.312	2	15
90.36	73.33	Q6QAQ1	ACTB_PIG	Actin, cytoplasmic 1 OS=Sus scrofa GN=ACTB PE=2 SV=2	0	99	DGQVITIGNER		cleaved P-D@N-term	1200.61	601.31	1200.61	601.312	2	13
90.36	73.33	Q6QAQ1	ACTB_PIG	Actin, cytoplasmic 1 OS=Sus scrofa GN=ACTB PE=2 SV=2	0	99	DGQVITIGNER		cleaved P-D@N-term	1200.61	601.311	1200.61	601.312	2	11
90.36	73.33	Q6QAQ1	ACTB_PIG	Actin, cytoplasmic 1 OS=Sus scrofa GN=ACTB PE=2 SV=2	0	99	DGQVITIGNER		cleaved P-D@N-term	1200.61	601.312	1200.61	601.312	2	11
90.36	73.33	Q6QAQ1	ACTB_PIG	Actin, cytoplasmic 1 OS=Sus scrofa GN=ACTB PE=2 SV=2	0	99	DGQVITIGNER		cleaved P-D@N-term	1200.61	601.312	1200.61	601.312	2	14
90.36	73.33	Q6QAQ1	ACTB_PIG	Actin, cytoplasmic 1 OS=Sus scrofa GN=ACTB PE=2 SV=2	0	96.47	DGQVITIGNER		cleaved P-D@N-term	1200.61	601.312	1200.61	601.312	2	8
90.36	73.33	Q6QAQ1	ACTB_PIG	Actin, cytoplasmic 1 OS=Sus scrofa GN=ACTB PE=2 SV=2	0	96.05	DGQVITIGNER		cleaved P-D@N-term	1200.61	601.312	1200.61	601.312	2	12
90.36	73.33	Q6QAQ1	ACTB_PIG	Actin, cytoplasmic 1 OS=Sus scrofa GN=ACTB PE=2 SV=2	0	93.37	DGQVITIGNER		cleaved P-D@N-term	1200.61	601.314	1200.61	601.312	2	8
90.36	73.33	Q6QAQ1	ACTB_PIG	Actin, cytoplasmic 1 OS=Sus scrofa GN=ACTB PE=2 SV=2	0	93.1	DGQVITIGNER		cleaved P-D@N-term	1200.61	601.312	1200.61	601.312	2	10
90.36	73.33	Q6QAQ1	ACTB_PIG	Actin, cytoplasmic 1 OS=Sus scrofa GN=ACTB PE=2 SV=2	0	70.09	DGQVITIGNER		cleaved P-D@N-term	1200.61	601.313	1200.61	601.312	2	10
90.36	73.33	Q6QAQ1	ACTB_PIG	Actin, cytoplasmic 1 OS=Sus scrofa GN=ACTB PE=2 SV=2	0	51.82	DGQVITIGNER		cleaved P-D@N-term	1200.61	601.31	1200.61	601.312	2	9
90.36	73.33	Q6QAQ1	ACTB_PIG	Actin, cytoplasmic 1 OS=Sus scrofa GN=ACTB PE=2 SV=2	0	46.19	DGQVITIGNER		cleaved P-D@N-term	1200.61	601.313	1200.61	601.312	2	9
90.36	73.33	Q6QAQ1	ACTB_PIG	Actin, cytoplasmic 1 OS=Sus scrofa GN=ACTB PE=2 SV=2	0	36.44	DGQVITIGNER		cleaved P-D@N-term	1200.61	601.312	1200.61	601.312	2	7
90.36	73.33	Q6QAQ1	ACTB_PIG	Actin, cytoplasmic 1 OS=Sus scrofa GN=ACTB PE=2 SV=2	0	27.24	DGQVITIGNER		cleaved P-D@N-term	1200.6	601.307	1200.61	601.312	2	10
90.36	73.33	Q6QAQ1	ACTB_PIG	Actin, cytoplasmic 1 OS=Sus scrofa GN=ACTB PE=2 SV=2	0	24.78	DGQVITIGNER		cleaved P-D@N-term	1200.67	601.343	1200.61	601.312	2	10
90.36	73.33	Q6QAQ1	ACTB_PIG	Actin, cytoplasmic 1 OS=Sus scrofa GN=ACTB PE=2 SV=2	0	95.73	DGQVITIGNERF		cleaved P-D@N-term; cleaved F-R@C-term; missed R-F@11	1347.68	674.847	1347.68	674.846	2	11
90.36	73.33	Q6QAQ1	ACTB_PIG	Actin, cytoplasmic 1 OS=Sus scrofa GN=ACTB PE=2 SV=2	0	99	DLTDYLMK			997.478	499.746	997.479	499.747	2	8
90.36	73.33	Q6QAQ1	ACTB_PIG	Actin, cytoplasmic 1 OS=Sus scrofa GN=ACTB PE=2 SV=2	0	99	DLTDYLMK			997.477	499.746	997.479	499.747	2	8
90.36	73.33	Q6QAQ1	ACTB_PIG	Actin, cytoplasmic 1 OS=Sus scrofa GN=ACTB PE=2 SV=2	0	99	DLTDYLMK			997.477	499.746	997.479	499.747	2	7
90.36	73.33	Q6QAQ1	ACTB_PIG	Actin, cytoplasmic 1 OS=Sus scrofa GN=ACTB PE=2 SV=2	0	99	DLTDYLMK			997.478	499.746	997.479	499.747	2	13
90.36	73.33	Q6QAQ1	ACTB_PIG	Actin, cytoplasmic 1 OS=Sus scrofa GN=ACTB PE=2 SV=2	0	99	DLTDYLMK			997.479	499.747	997.479	499.747	2	12
90.36	73.33	Q6QAQ1	ACTB_PIG	Actin, cytoplasmic 1 OS=Sus scrofa GN=ACTB PE=2 SV=2	0	99	DLTDYLMK			997.479	499.747	997.479	499.747	2	9
90.36	73.33	Q6QAQ1	ACTB_PIG	Actin, cytoplasmic 1 OS=Sus scrofa GN=ACTB PE=2 SV=2	0	99	DLTDYLMK			997.478	499.746	997.479	499.747	2	8
90.36	73.33	Q6QAQ1	ACTB_PIG	Actin, cytoplasmic 1 OS=Sus scrofa GN=ACTB PE=2 SV=2	0	99	DLTDYLMK			997.477	499.746	997.479	499.747	2	10
90.36	73.33	Q6QAQ1	ACTB_PIG	Actin, cytoplasmic 1 OS=Sus scrofa GN=ACTB PE=2 SV=2	0	99	DLTDYLMK			997.478	499.746	997.479	499.747	2	11
90.36	73.33	Q6QAQ1	ACTB_PIG	Actin, cytoplasmic 1 OS=Sus scrofa GN=ACTB PE=2 SV=2	0	99	DLTDYLMK			997.477	499.746	997.479	499.747	2	8
90.36	73.33	Q6QAQ1	ACTB_PIG	Actin, cytoplasmic 1 OS=Sus scrofa GN=ACTB PE=2 SV=2	0	99	DLTDYLMK			997.477	499.746	997.479	499.747	2	7
90.36	73.33	Q6QAQ1	ACTB_PIG	Actin, cytoplasmic 1 OS=Sus scrofa GN=ACTB PE=2 SV=2	0	99	DLTDYLMK	Oxidation(M)@7		1013.47	507.744	1013.47	507.744	2	8
90.36	73.33	Q6QAQ1	ACTB_PIG	Actin, cytoplasmic 1 OS=Sus scrofa GN=ACTB PE=2 SV=2	0	99	DLTDYLMK			997.479	499.747	997.479	499.747	2	6
90.36	73.33	Q6QAQ1	ACTB_PIG	Actin, cytoplasmic 1 OS=Sus scrofa GN=ACTB PE=2 SV=2	0	98.3	DLTDYLMK	Dethiomethyl(M)@7		949.476	475.745	949.476	475.745	2	12
90.36	73.33	Q6QAQ1	ACTB_PIG	Actin, cytoplasmic 1 OS=Sus scrofa GN=ACTB PE=2 SV=2	0	98.11	DLTDYLMK			997.477	499.746	997.479	499.747	2	7
90.36	73.33	Q6QAQ1	ACTB_PIG	Actin, cytoplasmic 1 OS=Sus scrofa GN=ACTB PE=2 SV=2	0	97.75	DLTDYLMK	Dethiomethyl(M)@7		949.476	475.745	949.476	475.745	2	12
90.36	73.33	Q6QAQ1	ACTB_PIG	Actin, cytoplasmic 1 OS=Sus scrofa GN=ACTB PE=2 SV=2	0	96.86	DLTDYLMK	Oxidation(M)@7		1013.47	507.744	1013.47	507.744	2	8
90.36	73.33	Q6QAQ1	ACTB_PIG	Actin, cytoplasmic 1 OS=Sus scrofa GN=ACTB PE=2 SV=2	0	94.99	DLTDYLMK			997.479	499.747	997.479	499.747	2	7
90.36	73.33	Q6QAQ1	ACTB_PIG	Actin, cytoplasmic 1 OS=Sus scrofa GN=ACTB PE=2 SV=2	0	92.63	DLTDYLMK	Dethiomethyl(M)@7		949.476	475.745	949.476	475.745	2	10
90.36	73.33	Q6QAQ1	ACTB_PIG	Actin, cytoplasmic 1 OS=Sus scrofa GN=ACTB PE=2 SV=2	0	92.51	DLTDYLMK	Dethiomethyl(M)@7		949.476	475.745	949.476	475.745	2	11
90.36	73.33	Q6QAQ1	ACTB_PIG	Actin, cytoplasmic 1 OS=Sus scrofa GN=ACTB PE=2 SV=2	0	91.15	DLTDYLMK	Oxidation(M)@7		1013.47	507.744	1013.47	507.744	2	7
90.36	73.33	Q6QAQ1	ACTB_PIG	Actin, cytoplasmic 1 OS=Sus scrofa GN=ACTB PE=2 SV=2	0	89.82	DLTDYLMK	Oxidation(M)@7		1013.47	507.745	1013.47	507.744	2	7
90.36	73.33	Q6QAQ1	ACTB_PIG	Actin, cytoplasmic 1 OS=Sus scrofa GN=ACTB PE=2 SV=2	0	86.65	DLTDYLMK	Dethiomethyl(M)@7		949.476	475.745	949.476	475.745	2	10
90.36	73.33	Q6QAQ1	ACTB_PIG	Actin, cytoplasmic 1 OS=Sus scrofa GN=ACTB PE=2 SV=2	0	86.64	DLTDYLMK	Oxidation(M)@7		1013.47	507.744	1013.47	507.744	2	7
90.36	73.33	Q6QAQ1	ACTB_PIG	Actin, cytoplasmic 1 OS=Sus scrofa GN=ACTB PE=2 SV=2	0	86.35	DLTDYLMK	Dethiomethyl(M)@7		949.474	475.744	949.476	475.745	2	8
90.36	73.33	Q6QAQ1	ACTB_PIG	Actin, cytoplasmic 1 OS=Sus scrofa GN=ACTB PE=2 SV=2	0	81.3	DLTDYLMK	Dethiomethyl(M)@7		949.476	475.745	949.476	475.745	2	11
90.36	73.33	Q6QAQ1	ACTB_PIG	Actin, cytoplasmic 1 OS=Sus scrofa GN=ACTB PE=2 SV=2	0	80.93	DLTDYLMK	Dethiomethyl(M)@7		949.476	475.745	949.476	475.745	2	8
90.36	73.33	Q6QAQ1	ACTB_PIG	Actin, cytoplasmic 1 OS=Sus scrofa GN=ACTB PE=2 SV=2	0	80.5	DLTDYLMK	Oxidation(M)@7		1013.47	507.744	1013.47	507.744	2	7
90.36	73.33	Q6QAQ1	ACTB_PIG	Actin, cytoplasmic 1 OS=Sus scrofa GN=ACTB PE=2 SV=2	0	79.29	DLTDYLMK	Dethiomethyl(M)@7		949.476	475.745	949.476	475.745	2	11
90.36	73.33	Q6QAQ1	ACTB_PIG	Actin, cytoplasmic 1 OS=Sus scrofa GN=ACTB PE=2 SV=2	0	75.28	DLTDYLMK	Dethiomethyl(M)@7		949.476	475.745	949.476	475.745	2	11
90.36	73.33	Q6QAQ1	ACTB_PIG	Actin, cytoplasmic 1 OS=Sus scrofa GN=ACTB PE=2 SV=2	0	73.83	DLTDYLMK	Dethiomethyl(M)@7		949.476	475.745	949.476	475.745	2	10
90.36	73.33	Q6QAQ1	ACTB_PIG	Actin, cytoplasmic 1 OS=Sus scrofa GN=ACTB PE=2 SV=2	0	73.46	DLTDYLMK	Oxidation(M)@7		1013.47	507.743	1013.47	507.744	2	7
90.36	73.33	Q6QAQ1	ACTB_PIG	Actin, cytoplasmic 1 OS=Sus scrofa GN=ACTB PE=2 SV=2	0	54.03	DLTDYLMK	Oxidation(M)@7		1013.47	507.743	1013.47	507.744	2	6
90.36	73.33	Q6QAQ1	ACTB_PIG	Actin, cytoplasmic 1 OS=Sus scrofa GN=ACTB PE=2 SV=2	0	48.34	DLTDYLMK	Dethiomethyl(M)@7		949.474	475.744	949.476	475.745	2	6
90.36	73.33	Q6QAQ1	ACTB_PIG	Actin, cytoplasmic 1 OS=Sus scrofa GN=ACTB PE=2 SV=2	0	40.09	DLTDYLMK	Oxidation(M)@7		1013.47	507.744	1013.47	507.744	2	7
90.36	73.33	Q6QAQ1	ACTB_PIG	Actin, cytoplasmic 1 OS=Sus scrofa GN=ACTB PE=2 SV=2	0	28.09	DLTDYLMK	Dethiomethyl(M)@7		949.475	475.745	949.476	475.745	2	8
90.36	73.33	Q6QAQ1	ACTB_PIG	Actin, cytoplasmic 1 OS=Sus scrofa GN=ACTB PE=2 SV=2	0	27.04	DLTDYLMK	Dethiomethyl(M)@7		949.474	475.744	949.476	475.745	2	6
90.36	73.33	Q6QAQ1	ACTB_PIG	Actin, cytoplasmic 1 OS=Sus scrofa GN=ACTB PE=2 SV=2	0	20.51	DLTDYLMK	Dethiomethyl(M)@7		949.475	475.745	949.476	475.745	2	7
90.36	73.33	Q6QAQ1	ACTB_PIG	Actin, cytoplasmic 1 OS=Sus scrofa GN=ACTB PE=2 SV=2	0	15.76	DLTDYLMK	Dethiomethyl(M)@7		949.475	475.745	949.476	475.745	2	7
90.36	73.33	Q6QAQ1	ACTB_PIG	Actin, cytoplasmic 1 OS=Sus scrofa GN=ACTB PE=2 SV=2	0	99	DLYANTVLSGGTTMYPGIADR			2214.06	1108.04	2214.06	1108.04	2	16
90.36	73.33	Q6QAQ1	ACTB_PIG	Actin, cytoplasmic 1 OS=Sus scrofa GN=ACTB PE=2 SV=2	0	99	DLYANTVLSGGTTMYPGIADR			2214.06	1108.04	2214.06	1108.04	2	13
90.36	73.33	Q6QAQ1	ACTB_PIG	Actin, cytoplasmic 1 OS=Sus scrofa GN=ACTB PE=2 SV=2	0	99	DLYANTVLSGGTTMYPGIADR			2214.06	1108.04	2214.06	1108.04	2	16
90.36	73.33	Q6QAQ1	ACTB_PIG	Actin, cytoplasmic 1 OS=Sus scrofa GN=ACTB PE=2 SV=2	0	99	DLYANTVLSGGTTMYPGIADR	Oxidation(M)@14		2230.06	1116.04	2230.06	1116.04	2	11
90.36	73.33	Q6QAQ1	ACTB_PIG	Actin, cytoplasmic 1 OS=Sus scrofa GN=ACTB PE=2 SV=2	0	99	DLYANTVLSGGTTMYPGIADR	Oxidation(M)@14		2230.06	744.361	2230.06	744.36	3	10
90.36	73.33	Q6QAQ1	ACTB_PIG	Actin, cytoplasmic 1 OS=Sus scrofa GN=ACTB PE=2 SV=2	0	99	DLYANTVLSGGTTMYPGIADR	Methyl(N)@5		2228.05	1115.03	2228.08	1115.05	2	15
90.36	73.33	Q6QAQ1	ACTB_PIG	Actin, cytoplasmic 1 OS=Sus scrofa GN=ACTB PE=2 SV=2	0	99	DLYANTVLSGGTTMYPGIADR	Oxidation(M)@14		2230.06	1116.04	2230.06	1116.04	2	9
90.36	73.33	Q6QAQ1	ACTB_PIG	Actin, cytoplasmic 1 OS=Sus scrofa GN=ACTB PE=2 SV=2	0	98.73	DLYANTVLSGGTTMYPGIADR			2214.07	1108.04	2214.06	1108.04	2	7
90.36	73.33	Q6QAQ1	ACTB_PIG	Actin, cytoplasmic 1 OS=Sus scrofa GN=ACTB PE=2 SV=2	0	98.34	DLYANTVLSGGTTMYPGIADR			2214.06	1108.04	2214.06	1108.04	2	10
90.36	73.33	Q6QAQ1	ACTB_PIG	Actin, cytoplasmic 1 OS=Sus scrofa GN=ACTB PE=2 SV=2	0	94.82	DLYANTVLSGGTTMYPGIADR			2214.06	1108.04	2214.06	1108.04	2	8
90.36	73.33	Q6QAQ1	ACTB_PIG	Actin, cytoplasmic 1 OS=Sus scrofa GN=ACTB PE=2 SV=2	0	86.7	DLYANTVLSGGTTMYPGIADR	Hex(N)@5; Dethiomethyl(M)@14		2328.1	1165.06	2328.11	1165.06	2	13
90.36	73.33	Q6QAQ1	ACTB_PIG	Actin, cytoplasmic 1 OS=Sus scrofa GN=ACTB PE=2 SV=2	0	85.06	DLYANTVLSGGTTMYPGIADR	Methyl(N)@5		2228.05	743.69	2228.08	743.7	3	9
90.36	73.33	Q6QAQ1	ACTB_PIG	Actin, cytoplasmic 1 OS=Sus scrofa GN=ACTB PE=2 SV=2	0	82.3	DLYANTVLSGGTTMYPGIADR			2214.07	739.031	2214.06	739.028	3	7
90.36	73.33	Q6QAQ1	ACTB_PIG	Actin, cytoplasmic 1 OS=Sus scrofa GN=ACTB PE=2 SV=2	0	67.81	DLYANTVLSGGTTMYPGIADR	Oxidation(M)@14		2230.06	744.361	2230.06	744.36	3	8
90.36	73.33	Q6QAQ1	ACTB_PIG	Actin, cytoplasmic 1 OS=Sus scrofa GN=ACTB PE=2 SV=2	0	60.89	DLYANTVLSGGTTMYPGIADR	Oxidation(M)@14		2230.05	1116.03	2230.06	1116.04	2	7
90.36	73.33	Q6QAQ1	ACTB_PIG	Actin, cytoplasmic 1 OS=Sus scrofa GN=ACTB PE=2 SV=2	0	99	DSYVGDEAQS		cleaved S-K@C-term	1069.42	535.717	1069.42	535.717	2	11
90.36	73.33	Q6QAQ1	ACTB_PIG	Actin, cytoplasmic 1 OS=Sus scrofa GN=ACTB PE=2 SV=2	0	99	DSYVGDEAQS		cleaved S-K@C-term	1069.42	535.717	1069.42	535.717	2	9
90.36	73.33	Q6QAQ1	ACTB_PIG	Actin, cytoplasmic 1 OS=Sus scrofa GN=ACTB PE=2 SV=2	0	99	DSYVGDEAQS		cleaved S-K@C-term	1069.42	535.717	1069.42	535.717	2	9
90.36	73.33	Q6QAQ1	ACTB_PIG	Actin, cytoplasmic 1 OS=Sus scrofa GN=ACTB PE=2 SV=2	0	99	DSYVGDEAQS		cleaved S-K@C-term	1069.42	535.717	1069.42	535.717	2	13
90.36	73.33	Q6QAQ1	ACTB_PIG	Actin, cytoplasmic 1 OS=Sus scrofa GN=ACTB PE=2 SV=2	0	99	DSYVGDEAQS		cleaved S-K@C-term	1069.42	535.717	1069.42	535.717	2	9
90.36	73.33	Q6QAQ1	ACTB_PIG	Actin, cytoplasmic 1 OS=Sus scrofa GN=ACTB PE=2 SV=2	0	99	DSYVGDEAQS		cleaved S-K@C-term	1069.42	535.717	1069.42	535.717	2	13
90.36	73.33	Q6QAQ1	ACTB_PIG	Actin, cytoplasmic 1 OS=Sus scrofa GN=ACTB PE=2 SV=2	0	98.1	DSYVGDEAQS		cleaved S-K@C-term	1069.42	535.718	1069.42	535.717	2	12
90.36	73.33	Q6QAQ1	ACTB_PIG	Actin, cytoplasmic 1 OS=Sus scrofa GN=ACTB PE=2 SV=2	0	97.87	DSYVGDEAQS		cleaved S-K@C-term	1069.42	535.717	1069.42	535.717	2	8
90.36	73.33	Q6QAQ1	ACTB_PIG	Actin, cytoplasmic 1 OS=Sus scrofa GN=ACTB PE=2 SV=2	0	94.86	DSYVGDEAQS		cleaved S-K@C-term	1069.42	535.718	1069.42	535.717	2	10
90.36	73.33	Q6QAQ1	ACTB_PIG	Actin, cytoplasmic 1 OS=Sus scrofa GN=ACTB PE=2 SV=2	0	87.44	DSYVGDEAQS		cleaved S-K@C-term	1069.42	535.719	1069.42	535.717	2	8
90.36	73.33	Q6QAQ1	ACTB_PIG	Actin, cytoplasmic 1 OS=Sus scrofa GN=ACTB PE=2 SV=2	0	85.25	DSYVGDEAQS		cleaved S-K@C-term	1069.42	535.718	1069.42	535.717	2	7
90.36	73.33	Q6QAQ1	ACTB_PIG	Actin, cytoplasmic 1 OS=Sus scrofa GN=ACTB PE=2 SV=2	0	75.38	DSYVGDEAQS		cleaved S-K@C-term	1069.42	535.717	1069.42	535.717	2	8
90.36	73.33	Q6QAQ1	ACTB_PIG	Actin, cytoplasmic 1 OS=Sus scrofa GN=ACTB PE=2 SV=2	0	72.24	DSYVGDEAQS		cleaved S-K@C-term	1069.42	535.717	1069.42	535.717	2	7
90.36	73.33	Q6QAQ1	ACTB_PIG	Actin, cytoplasmic 1 OS=Sus scrofa GN=ACTB PE=2 SV=2	0	62.46	DSYVGDEAQS		cleaved S-K@C-term	1069.42	535.718	1069.42	535.717	2	7
90.36	73.33	Q6QAQ1	ACTB_PIG	Actin, cytoplasmic 1 OS=Sus scrofa GN=ACTB PE=2 SV=2	0	59.34	DSYVGDEAQS		cleaved S-K@C-term	1069.42	535.717	1069.42	535.717	2	6
90.36	73.33	Q6QAQ1	ACTB_PIG	Actin, cytoplasmic 1 OS=Sus scrofa GN=ACTB PE=2 SV=2	0	24.34	DSYVGDEAQS		cleaved S-K@C-term	1069.42	535.718	1069.42	535.717	2	6
90.36	73.33	Q6QAQ1	ACTB_PIG	Actin, cytoplasmic 1 OS=Sus scrofa GN=ACTB PE=2 SV=2	0	99	DSYVGDEAQSK			1197.52	599.765	1197.52	599.765	2	10
90.36	73.33	Q6QAQ1	ACTB_PIG	Actin, cytoplasmic 1 OS=Sus scrofa GN=ACTB PE=2 SV=2	0	99	DSYVGDEAQSK			1197.52	599.765	1197.52	599.765	2	12
90.36	73.33	Q6QAQ1	ACTB_PIG	Actin, cytoplasmic 1 OS=Sus scrofa GN=ACTB PE=2 SV=2	0	99	DSYVGDEAQSK			1197.52	599.765	1197.52	599.765	2	11
90.36	73.33	Q6QAQ1	ACTB_PIG	Actin, cytoplasmic 1 OS=Sus scrofa GN=ACTB PE=2 SV=2	0	99	DSYVGDEAQSK			1197.51	599.764	1197.52	599.765	2	7
90.36	73.33	Q6QAQ1	ACTB_PIG	Actin, cytoplasmic 1 OS=Sus scrofa GN=ACTB PE=2 SV=2	0	99	DSYVGDEAQSK			1197.52	599.765	1197.52	599.765	2	8
90.36	73.33	Q6QAQ1	ACTB_PIG	Actin, cytoplasmic 1 OS=Sus scrofa GN=ACTB PE=2 SV=2	0	99	DSYVGDEAQSK			1197.52	599.765	1197.52	599.765	2	8
90.36	73.33	Q6QAQ1	ACTB_PIG	Actin, cytoplasmic 1 OS=Sus scrofa GN=ACTB PE=2 SV=2	0	99	DSYVGDEAQSK			1197.51	599.764	1197.52	599.765	2	11
90.36	73.33	Q6QAQ1	ACTB_PIG	Actin, cytoplasmic 1 OS=Sus scrofa GN=ACTB PE=2 SV=2	0	99	DSYVGDEAQSK			1197.51	599.764	1197.52	599.765	2	11
90.36	73.33	Q6QAQ1	ACTB_PIG	Actin, cytoplasmic 1 OS=Sus scrofa GN=ACTB PE=2 SV=2	0	99	DSYVGDEAQSK			1197.51	599.765	1197.52	599.765	2	11
90.36	73.33	Q6QAQ1	ACTB_PIG	Actin, cytoplasmic 1 OS=Sus scrofa GN=ACTB PE=2 SV=2	0	99	DSYVGDEAQSK			1197.51	599.764	1197.52	599.765	2	14
90.36	73.33	Q6QAQ1	ACTB_PIG	Actin, cytoplasmic 1 OS=Sus scrofa GN=ACTB PE=2 SV=2	0	99	DSYVGDEAQSK			1197.51	599.764	1197.52	599.765	2	15
90.36	73.33	Q6QAQ1	ACTB_PIG	Actin, cytoplasmic 1 OS=Sus scrofa GN=ACTB PE=2 SV=2	0	99	DSYVGDEAQSK			1197.51	599.765	1197.52	599.765	2	15
90.36	73.33	Q6QAQ1	ACTB_PIG	Actin, cytoplasmic 1 OS=Sus scrofa GN=ACTB PE=2 SV=2	0	99	DSYVGDEAQSK			1197.51	599.765	1197.52	599.765	2	14
90.36	73.33	Q6QAQ1	ACTB_PIG	Actin, cytoplasmic 1 OS=Sus scrofa GN=ACTB PE=2 SV=2	0	99	DSYVGDEAQSK			1197.51	599.765	1197.52	599.765	2	14
90.36	73.33	Q6QAQ1	ACTB_PIG	Actin, cytoplasmic 1 OS=Sus scrofa GN=ACTB PE=2 SV=2	0	99	DSYVGDEAQSK			1197.51	599.764	1197.52	599.765	2	12
90.36	73.33	Q6QAQ1	ACTB_PIG	Actin, cytoplasmic 1 OS=Sus scrofa GN=ACTB PE=2 SV=2	0	99	DSYVGDEAQSK			1197.51	599.764	1197.52	599.765	2	12
90.36	73.33	Q6QAQ1	ACTB_PIG	Actin, cytoplasmic 1 OS=Sus scrofa GN=ACTB PE=2 SV=2	0	99	DSYVGDEAQSK			1197.51	599.764	1197.52	599.765	2	12
90.36	73.33	Q6QAQ1	ACTB_PIG	Actin, cytoplasmic 1 OS=Sus scrofa GN=ACTB PE=2 SV=2	0	99	DSYVGDEAQSK			1197.51	599.764	1197.52	599.765	2	11
90.36	73.33	Q6QAQ1	ACTB_PIG	Actin, cytoplasmic 1 OS=Sus scrofa GN=ACTB PE=2 SV=2	0	99	DSYVGDEAQSK			1197.52	599.765	1197.52	599.765	2	12
90.36	73.33	Q6QAQ1	ACTB_PIG	Actin, cytoplasmic 1 OS=Sus scrofa GN=ACTB PE=2 SV=2	0	99	DSYVGDEAQSK			1197.51	599.764	1197.52	599.765	2	10
90.36	73.33	Q6QAQ1	ACTB_PIG	Actin, cytoplasmic 1 OS=Sus scrofa GN=ACTB PE=2 SV=2	0	99	DSYVGDEAQSK			1197.51	599.764	1197.52	599.765	2	10
90.36	73.33	Q6QAQ1	ACTB_PIG	Actin, cytoplasmic 1 OS=Sus scrofa GN=ACTB PE=2 SV=2	0	99	DSYVGDEAQSK			1197.51	599.765	1197.52	599.765	2	13
90.36	73.33	Q6QAQ1	ACTB_PIG	Actin, cytoplasmic 1 OS=Sus scrofa GN=ACTB PE=2 SV=2	0	99	DSYVGDEAQSK			1197.51	599.764	1197.52	599.765	2	11
90.36	73.33	Q6QAQ1	ACTB_PIG	Actin, cytoplasmic 1 OS=Sus scrofa GN=ACTB PE=2 SV=2	0	99	DSYVGDEAQSK			1197.51	599.764	1197.52	599.765	2	9
90.36	73.33	Q6QAQ1	ACTB_PIG	Actin, cytoplasmic 1 OS=Sus scrofa GN=ACTB PE=2 SV=2	0	99	DSYVGDEAQSK			1197.52	599.765	1197.52	599.765	2	9
90.36	73.33	Q6QAQ1	ACTB_PIG	Actin, cytoplasmic 1 OS=Sus scrofa GN=ACTB PE=2 SV=2	0	99	DSYVGDEAQSK			1197.51	599.764	1197.52	599.765	2	12
90.36	73.33	Q6QAQ1	ACTB_PIG	Actin, cytoplasmic 1 OS=Sus scrofa GN=ACTB PE=2 SV=2	0	99	DSYVGDEAQSK			1197.52	599.765	1197.52	599.765	2	8
90.36	73.33	Q6QAQ1	ACTB_PIG	Actin, cytoplasmic 1 OS=Sus scrofa GN=ACTB PE=2 SV=2	0	99	DSYVGDEAQSK			1197.52	599.765	1197.52	599.765	2	8
90.36	73.33	Q6QAQ1	ACTB_PIG	Actin, cytoplasmic 1 OS=Sus scrofa GN=ACTB PE=2 SV=2	0	99	DSYVGDEAQSK			1197.52	599.765	1197.52	599.765	2	8
90.36	73.33	Q6QAQ1	ACTB_PIG	Actin, cytoplasmic 1 OS=Sus scrofa GN=ACTB PE=2 SV=2	0	99	DSYVGDEAQSK			1197.52	599.765	1197.52	599.765	2	9
90.36	73.33	Q6QAQ1	ACTB_PIG	Actin, cytoplasmic 1 OS=Sus scrofa GN=ACTB PE=2 SV=2	0	99	DSYVGDEAQSK			1197.52	599.765	1197.52	599.765	2	9
90.36	73.33	Q6QAQ1	ACTB_PIG	Actin, cytoplasmic 1 OS=Sus scrofa GN=ACTB PE=2 SV=2	0	99	DSYVGDEAQSK			1197.52	599.765	1197.52	599.765	2	10
90.36	73.33	Q6QAQ1	ACTB_PIG	Actin, cytoplasmic 1 OS=Sus scrofa GN=ACTB PE=2 SV=2	0	99	DSYVGDEAQSK			1197.52	599.765	1197.52	599.765	2	11
90.36	73.33	Q6QAQ1	ACTB_PIG	Actin, cytoplasmic 1 OS=Sus scrofa GN=ACTB PE=2 SV=2	0	99	DSYVGDEAQSK			1197.52	599.765	1197.52	599.765	2	11
90.36	73.33	Q6QAQ1	ACTB_PIG	Actin, cytoplasmic 1 OS=Sus scrofa GN=ACTB PE=2 SV=2	0	99	DSYVGDEAQSK			1197.51	599.764	1197.52	599.765	2	10
90.36	73.33	Q6QAQ1	ACTB_PIG	Actin, cytoplasmic 1 OS=Sus scrofa GN=ACTB PE=2 SV=2	0	99	DSYVGDEAQSK			1197.51	599.765	1197.52	599.765	2	10
90.36	73.33	Q6QAQ1	ACTB_PIG	Actin, cytoplasmic 1 OS=Sus scrofa GN=ACTB PE=2 SV=2	0	99	DSYVGDEAQSK			1197.52	599.765	1197.52	599.765	2	7
90.36	73.33	Q6QAQ1	ACTB_PIG	Actin, cytoplasmic 1 OS=Sus scrofa GN=ACTB PE=2 SV=2	0	99	DSYVGDEAQSK			1197.51	599.764	1197.52	599.765	2	11
90.36	73.33	Q6QAQ1	ACTB_PIG	Actin, cytoplasmic 1 OS=Sus scrofa GN=ACTB PE=2 SV=2	0	99	DSYVGDEAQSK			1197.52	599.765	1197.52	599.765	2	8
90.36	73.33	Q6QAQ1	ACTB_PIG	Actin, cytoplasmic 1 OS=Sus scrofa GN=ACTB PE=2 SV=2	0	97.17	DSYVGDEAQSK			1197.52	599.765	1197.52	599.765	2	6
90.36	73.33	Q6QAQ1	ACTB_PIG	Actin, cytoplasmic 1 OS=Sus scrofa GN=ACTB PE=2 SV=2	0	96.86	DSYVGDEAQSK			1197.52	599.765	1197.52	599.765	2	9
90.36	73.33	Q6QAQ1	ACTB_PIG	Actin, cytoplasmic 1 OS=Sus scrofa GN=ACTB PE=2 SV=2	0	96.49	DSYVGDEAQSK			1197.51	599.765	1197.52	599.765	2	6
90.36	73.33	Q6QAQ1	ACTB_PIG	Actin, cytoplasmic 1 OS=Sus scrofa GN=ACTB PE=2 SV=2	0	95.95	DSYVGDEAQSK			1197.52	599.765	1197.52	599.765	2	6
90.36	73.33	Q6QAQ1	ACTB_PIG	Actin, cytoplasmic 1 OS=Sus scrofa GN=ACTB PE=2 SV=2	0	94.94	DSYVGDEAQSK			1197.51	599.764	1197.52	599.765	2	7
90.36	73.33	Q6QAQ1	ACTB_PIG	Actin, cytoplasmic 1 OS=Sus scrofa GN=ACTB PE=2 SV=2	0	91.28	DSYVGDEAQSK			1197.52	599.765	1197.52	599.765	2	5
90.36	73.33	Q6QAQ1	ACTB_PIG	Actin, cytoplasmic 1 OS=Sus scrofa GN=ACTB PE=2 SV=2	0	88.55	DSYVGDEAQSK	Carbamyl@N-term; Methyl(S)@2		1254.54	628.276	1254.54	628.276	2	8
90.36	73.33	Q6QAQ1	ACTB_PIG	Actin, cytoplasmic 1 OS=Sus scrofa GN=ACTB PE=2 SV=2	0	73.65	DSYVGDEAQSK			1197.52	599.765	1197.52	599.765	2	6
90.36	73.33	Q6QAQ1	ACTB_PIG	Actin, cytoplasmic 1 OS=Sus scrofa GN=ACTB PE=2 SV=2	0	69.07	DSYVGDEAQSK			1197.53	599.771	1197.52	599.765	2	6
90.36	73.33	Q6QAQ1	ACTB_PIG	Actin, cytoplasmic 1 OS=Sus scrofa GN=ACTB PE=2 SV=2	0	63.68	DSYVGDEAQSK			1197.52	599.765	1197.52	599.765	2	5
90.36	73.33	Q6QAQ1	ACTB_PIG	Actin, cytoplasmic 1 OS=Sus scrofa GN=ACTB PE=2 SV=2	0	46.09	DSYVGDEAQSK			1197.52	599.765	1197.52	599.765	2	5
90.36	73.33	Q6QAQ1	ACTB_PIG	Actin, cytoplasmic 1 OS=Sus scrofa GN=ACTB PE=2 SV=2	0	20.49	DSYVGDEAQSK			1197.52	599.765	1197.52	599.765	2	5
90.36	73.33	Q6QAQ1	ACTB_PIG	Actin, cytoplasmic 1 OS=Sus scrofa GN=ACTB PE=2 SV=2	0	99	EEHPVLLTEAPLNPK		cleaved P-E@N-term	1685.9	562.973	1685.9	562.974	3	17
90.36	73.33	Q6QAQ1	ACTB_PIG	Actin, cytoplasmic 1 OS=Sus scrofa GN=ACTB PE=2 SV=2	0	99	EEHPVLLTEAPLNPK		cleaved P-E@N-term	1685.9	843.956	1685.9	843.957	2	17
90.36	73.33	Q6QAQ1	ACTB_PIG	Actin, cytoplasmic 1 OS=Sus scrofa GN=ACTB PE=2 SV=2	0	99	EEHPVLLTEAPLNPK		cleaved P-E@N-term	1685.9	562.973	1685.9	562.974	3	16
90.36	73.33	Q6QAQ1	ACTB_PIG	Actin, cytoplasmic 1 OS=Sus scrofa GN=ACTB PE=2 SV=2	0	99	EEHPVLLTEAPLNPK		cleaved P-E@N-term	1685.89	843.953	1685.9	843.957	2	13
90.36	73.33	Q6QAQ1	ACTB_PIG	Actin, cytoplasmic 1 OS=Sus scrofa GN=ACTB PE=2 SV=2	0	99	EEHPVLLTEAPLNPK		cleaved P-E@N-term	1685.9	843.956	1685.9	843.957	2	15
90.36	73.33	Q6QAQ1	ACTB_PIG	Actin, cytoplasmic 1 OS=Sus scrofa GN=ACTB PE=2 SV=2	0	99	EEHPVLLTEAPLNPK		cleaved P-E@N-term	1685.9	843.956	1685.9	843.957	2	13
90.36	73.33	Q6QAQ1	ACTB_PIG	Actin, cytoplasmic 1 OS=Sus scrofa GN=ACTB PE=2 SV=2	0	99	EEHPVLLTEAPLNPK		cleaved P-E@N-term	1685.9	843.957	1685.9	843.957	2	17
90.36	73.33	Q6QAQ1	ACTB_PIG	Actin, cytoplasmic 1 OS=Sus scrofa GN=ACTB PE=2 SV=2	0	99	EEHPVLLTEAPLNPK		cleaved P-E@N-term	1685.82	562.947	1685.9	562.974	3	15
90.36	73.33	Q6QAQ1	ACTB_PIG	Actin, cytoplasmic 1 OS=Sus scrofa GN=ACTB PE=2 SV=2	0	99	EEHPVLLTEAPLNPK		cleaved P-E@N-term	1685.89	843.954	1685.9	843.957	2	17
90.36	73.33	Q6QAQ1	ACTB_PIG	Actin, cytoplasmic 1 OS=Sus scrofa GN=ACTB PE=2 SV=2	0	99	EEHPVLLTEAPLNPK		cleaved P-E@N-term	1685.9	562.974	1685.9	562.974	3	13
90.36	73.33	Q6QAQ1	ACTB_PIG	Actin, cytoplasmic 1 OS=Sus scrofa GN=ACTB PE=2 SV=2	0	99	EEHPVLLTEAPLNPK		cleaved P-E@N-term	1685.89	843.954	1685.9	843.957	2	15
90.36	73.33	Q6QAQ1	ACTB_PIG	Actin, cytoplasmic 1 OS=Sus scrofa GN=ACTB PE=2 SV=2	0	99	EEHPVLLTEAPLNPK		cleaved P-E@N-term	1685.9	562.973	1685.9	562.974	3	17
90.36	73.33	Q6QAQ1	ACTB_PIG	Actin, cytoplasmic 1 OS=Sus scrofa GN=ACTB PE=2 SV=2	0	99	EEHPVLLTEAPLNPK		cleaved P-E@N-term	1685.9	562.973	1685.9	562.974	3	15
90.36	73.33	Q6QAQ1	ACTB_PIG	Actin, cytoplasmic 1 OS=Sus scrofa GN=ACTB PE=2 SV=2	0	97.85	EEHPVLLTEAPLNPK		cleaved P-E@N-term	1685.9	562.973	1685.9	562.974	3	11
90.36	73.33	Q6QAQ1	ACTB_PIG	Actin, cytoplasmic 1 OS=Sus scrofa GN=ACTB PE=2 SV=2	0	75.54	EEHPVLLTEAPLNPK	Carbamyl@N-term; Oxidation(P)@4	cleaved P-E@N-term	1744.9	873.456	1744.9	873.457	2	9
90.36	73.33	Q6QAQ1	ACTB_PIG	Actin, cytoplasmic 1 OS=Sus scrofa GN=ACTB PE=2 SV=2	0	65.86	EEHPVLLTEAPLNPK		cleaved P-E@N-term	1685.9	562.973	1685.9	562.974	3	7
90.36	73.33	Q6QAQ1	ACTB_PIG	Actin, cytoplasmic 1 OS=Sus scrofa GN=ACTB PE=2 SV=2	0	99	EHPVLLTEAPLNPK		cleaved E-E@N-term	1556.85	519.959	1556.86	519.959	3	12
90.36	73.33	Q6QAQ1	ACTB_PIG	Actin, cytoplasmic 1 OS=Sus scrofa GN=ACTB PE=2 SV=2	0	99	EHPVLLTEAPLNPK		cleaved E-E@N-term	1556.86	779.435	1556.86	779.435	2	10
90.36	73.33	Q6QAQ1	ACTB_PIG	Actin, cytoplasmic 1 OS=Sus scrofa GN=ACTB PE=2 SV=2	0	89.56	EHPVLLTEAPLNPK		cleaved E-E@N-term	1556.85	779.435	1556.86	779.435	2	8
90.36	73.33	Q6QAQ1	ACTB_PIG	Actin, cytoplasmic 1 OS=Sus scrofa GN=ACTB PE=2 SV=2	0	76.89	EITALAPS		cleaved S-T@C-term	800.427	401.221	800.428	401.221	2	10
90.36	73.33	Q6QAQ1	ACTB_PIG	Actin, cytoplasmic 1 OS=Sus scrofa GN=ACTB PE=2 SV=2	0	47.1	EITALAPS		cleaved S-T@C-term	800.43	401.222	800.428	401.221	2	6
90.36	73.33	Q6QAQ1	ACTB_PIG	Actin, cytoplasmic 1 OS=Sus scrofa GN=ACTB PE=2 SV=2	0	29.55	EITALAPS		cleaved S-T@C-term	800.427	401.221	800.428	401.221	2	9
90.36	73.33	Q6QAQ1	ACTB_PIG	Actin, cytoplasmic 1 OS=Sus scrofa GN=ACTB PE=2 SV=2	0	29.55	EITALAPS		cleaved S-T@C-term	800.429	401.222	800.428	401.221	2	7
90.36	73.33	Q6QAQ1	ACTB_PIG	Actin, cytoplasmic 1 OS=Sus scrofa GN=ACTB PE=2 SV=2	0	71.52	EITALAPST		cleaved T-M@C-term	901.477	451.745	901.476	451.745	2	7
90.36	73.33	Q6QAQ1	ACTB_PIG	Actin, cytoplasmic 1 OS=Sus scrofa GN=ACTB PE=2 SV=2	0	68.16	EITALAPST		cleaved T-M@C-term	901.477	451.745	901.476	451.745	2	7
90.36	73.33	Q6QAQ1	ACTB_PIG	Actin, cytoplasmic 1 OS=Sus scrofa GN=ACTB PE=2 SV=2	0	56.67	EITALAPST		cleaved T-M@C-term	901.479	451.747	901.476	451.745	2	9
90.36	73.33	Q6QAQ1	ACTB_PIG	Actin, cytoplasmic 1 OS=Sus scrofa GN=ACTB PE=2 SV=2	0	99	EITALAPSTM		cleaved M-K@C-term	1032.52	517.266	1032.52	517.265	2	10
90.36	73.33	Q6QAQ1	ACTB_PIG	Actin, cytoplasmic 1 OS=Sus scrofa GN=ACTB PE=2 SV=2	0	95.75	EITALAPSTM		cleaved M-K@C-term	1032.52	517.266	1032.52	517.265	2	10
90.36	73.33	Q6QAQ1	ACTB_PIG	Actin, cytoplasmic 1 OS=Sus scrofa GN=ACTB PE=2 SV=2	0	92.33	EITALAPSTM		cleaved M-K@C-term	1032.52	517.266	1032.52	517.265	2	9
90.36	73.33	Q6QAQ1	ACTB_PIG	Actin, cytoplasmic 1 OS=Sus scrofa GN=ACTB PE=2 SV=2	0	91.39	EITALAPSTM		cleaved M-K@C-term	1032.52	517.266	1032.52	517.265	2	12
90.36	73.33	Q6QAQ1	ACTB_PIG	Actin, cytoplasmic 1 OS=Sus scrofa GN=ACTB PE=2 SV=2	0	74.45	EITALAPSTM		cleaved M-K@C-term	1032.52	517.266	1032.52	517.265	2	8
90.36	73.33	Q6QAQ1	ACTB_PIG	Actin, cytoplasmic 1 OS=Sus scrofa GN=ACTB PE=2 SV=2	0	50.3	EITALAPSTM	Oxidation(M)@10	cleaved M-K@C-term	1048.52	525.268	1048.51	525.263	2	8
90.36	73.33	Q6QAQ1	ACTB_PIG	Actin, cytoplasmic 1 OS=Sus scrofa GN=ACTB PE=2 SV=2	0	43.35	EITALAPSTM	Oxidation(M)@10	cleaved M-K@C-term	1048.51	525.263	1048.51	525.263	2	7
90.36	73.33	Q6QAQ1	ACTB_PIG	Actin, cytoplasmic 1 OS=Sus scrofa GN=ACTB PE=2 SV=2	0	37.58	EITALAPSTM	Oxidation(M)@10	cleaved M-K@C-term	1048.51	525.263	1048.51	525.263	2	7
90.36	73.33	Q6QAQ1	ACTB_PIG	Actin, cytoplasmic 1 OS=Sus scrofa GN=ACTB PE=2 SV=2	0	99	EITALAPSTMK			1160.61	581.313	1160.61	581.313	2	15
90.36	73.33	Q6QAQ1	ACTB_PIG	Actin, cytoplasmic 1 OS=Sus scrofa GN=ACTB PE=2 SV=2	0	99	EITALAPSTMK			1160.61	581.313	1160.61	581.313	2	9
90.36	73.33	Q6QAQ1	ACTB_PIG	Actin, cytoplasmic 1 OS=Sus scrofa GN=ACTB PE=2 SV=2	0	99	EITALAPSTMK			1160.61	581.313	1160.61	581.313	2	13
90.36	73.33	Q6QAQ1	ACTB_PIG	Actin, cytoplasmic 1 OS=Sus scrofa GN=ACTB PE=2 SV=2	0	99	EITALAPSTMK			1160.61	581.313	1160.61	581.313	2	13
90.36	73.33	Q6QAQ1	ACTB_PIG	Actin, cytoplasmic 1 OS=Sus scrofa GN=ACTB PE=2 SV=2	0	99	EITALAPSTMK			1160.61	581.312	1160.61	581.313	2	13
90.36	73.33	Q6QAQ1	ACTB_PIG	Actin, cytoplasmic 1 OS=Sus scrofa GN=ACTB PE=2 SV=2	0	99	EITALAPSTMK			1160.61	581.313	1160.61	581.313	2	15
90.36	73.33	Q6QAQ1	ACTB_PIG	Actin, cytoplasmic 1 OS=Sus scrofa GN=ACTB PE=2 SV=2	0	99	EITALAPSTMK			1160.61	581.312	1160.61	581.313	2	14
90.36	73.33	Q6QAQ1	ACTB_PIG	Actin, cytoplasmic 1 OS=Sus scrofa GN=ACTB PE=2 SV=2	0	99	EITALAPSTMK	Oxidation(M)@10		1176.61	589.311	1176.61	589.31	2	14
90.36	73.33	Q6QAQ1	ACTB_PIG	Actin, cytoplasmic 1 OS=Sus scrofa GN=ACTB PE=2 SV=2	0	99	EITALAPSTMK	Oxidation(M)@10		1176.61	589.311	1176.61	589.31	2	14
90.36	73.33	Q6QAQ1	ACTB_PIG	Actin, cytoplasmic 1 OS=Sus scrofa GN=ACTB PE=2 SV=2	0	99	EITALAPSTMK			1160.61	581.313	1160.61	581.313	2	10
90.36	73.33	Q6QAQ1	ACTB_PIG	Actin, cytoplasmic 1 OS=Sus scrofa GN=ACTB PE=2 SV=2	0	99	EITALAPSTMK			1160.61	581.312	1160.61	581.313	2	11
90.36	73.33	Q6QAQ1	ACTB_PIG	Actin, cytoplasmic 1 OS=Sus scrofa GN=ACTB PE=2 SV=2	0	99	EITALAPSTMK			1160.61	581.312	1160.61	581.313	2	10
90.36	73.33	Q6QAQ1	ACTB_PIG	Actin, cytoplasmic 1 OS=Sus scrofa GN=ACTB PE=2 SV=2	0	99	EITALAPSTMK			1160.61	581.313	1160.61	581.313	2	14
90.36	73.33	Q6QAQ1	ACTB_PIG	Actin, cytoplasmic 1 OS=Sus scrofa GN=ACTB PE=2 SV=2	0	99	EITALAPSTMK			1160.61	581.313	1160.61	581.313	2	14
90.36	73.33	Q6QAQ1	ACTB_PIG	Actin, cytoplasmic 1 OS=Sus scrofa GN=ACTB PE=2 SV=2	0	99	EITALAPSTMK			1160.61	581.312	1160.61	581.313	2	13
90.36	73.33	Q6QAQ1	ACTB_PIG	Actin, cytoplasmic 1 OS=Sus scrofa GN=ACTB PE=2 SV=2	0	99	EITALAPSTMK			1160.61	581.312	1160.61	581.313	2	12
90.36	73.33	Q6QAQ1	ACTB_PIG	Actin, cytoplasmic 1 OS=Sus scrofa GN=ACTB PE=2 SV=2	0	99	EITALAPSTMK			1160.61	581.313	1160.61	581.313	2	12
90.36	73.33	Q6QAQ1	ACTB_PIG	Actin, cytoplasmic 1 OS=Sus scrofa GN=ACTB PE=2 SV=2	0	99	EITALAPSTMK			1160.61	581.313	1160.61	581.313	2	13
90.36	73.33	Q6QAQ1	ACTB_PIG	Actin, cytoplasmic 1 OS=Sus scrofa GN=ACTB PE=2 SV=2	0	99	EITALAPSTMK			1160.61	581.313	1160.61	581.313	2	15
90.36	73.33	Q6QAQ1	ACTB_PIG	Actin, cytoplasmic 1 OS=Sus scrofa GN=ACTB PE=2 SV=2	0	99	EITALAPSTMK			1160.61	581.313	1160.61	581.313	2	11
90.36	73.33	Q6QAQ1	ACTB_PIG	Actin, cytoplasmic 1 OS=Sus scrofa GN=ACTB PE=2 SV=2	0	99	EITALAPSTMK			1160.61	581.313	1160.61	581.313	2	14
90.36	73.33	Q6QAQ1	ACTB_PIG	Actin, cytoplasmic 1 OS=Sus scrofa GN=ACTB PE=2 SV=2	0	99	EITALAPSTMK			1160.61	581.313	1160.61	581.313	2	14
90.36	73.33	Q6QAQ1	ACTB_PIG	Actin, cytoplasmic 1 OS=Sus scrofa GN=ACTB PE=2 SV=2	0	99	EITALAPSTMK			1160.61	581.313	1160.61	581.313	2	11
90.36	73.33	Q6QAQ1	ACTB_PIG	Actin, cytoplasmic 1 OS=Sus scrofa GN=ACTB PE=2 SV=2	0	98.62	EITALAPSTMK	Oxidation(M)@10		1176.61	589.311	1176.61	589.31	2	11
90.36	73.33	Q6QAQ1	ACTB_PIG	Actin, cytoplasmic 1 OS=Sus scrofa GN=ACTB PE=2 SV=2	0	97.84	EITALAPSTMK			1160.61	581.312	1160.61	581.313	2	10
90.36	73.33	Q6QAQ1	ACTB_PIG	Actin, cytoplasmic 1 OS=Sus scrofa GN=ACTB PE=2 SV=2	0	96.68	EITALAPSTMK			1160.61	581.311	1160.61	581.313	2	7
90.36	73.33	Q6QAQ1	ACTB_PIG	Actin, cytoplasmic 1 OS=Sus scrofa GN=ACTB PE=2 SV=2	0	91.93	EITALAPSTMK			1160.61	581.312	1160.61	581.313	2	9
90.36	73.33	Q6QAQ1	ACTB_PIG	Actin, cytoplasmic 1 OS=Sus scrofa GN=ACTB PE=2 SV=2	0	89.98	EITALAPSTMK	Dethiomethyl(M)@10		1112.61	371.877	1112.61	371.877	3	8
90.36	73.33	Q6QAQ1	ACTB_PIG	Actin, cytoplasmic 1 OS=Sus scrofa GN=ACTB PE=2 SV=2	0	86.64	EITALAPSTMK			1160.6	581.309	1160.61	581.313	2	6
90.36	73.33	Q6QAQ1	ACTB_PIG	Actin, cytoplasmic 1 OS=Sus scrofa GN=ACTB PE=2 SV=2	0	76.74	EITALAPSTMK			1160.61	581.313	1160.61	581.313	2	7
90.36	73.33	Q6QAQ1	ACTB_PIG	Actin, cytoplasmic 1 OS=Sus scrofa GN=ACTB PE=2 SV=2	0	76.34	EITALAPSTMK			1160.6	581.308	1160.61	581.313	2	7
90.36	73.33	Q6QAQ1	ACTB_PIG	Actin, cytoplasmic 1 OS=Sus scrofa GN=ACTB PE=2 SV=2	0	67.12	EITALAPSTMK	Dethiomethyl(M)@10		1112.61	557.311	1112.61	557.311	2	7
90.36	73.33	Q6QAQ1	ACTB_PIG	Actin, cytoplasmic 1 OS=Sus scrofa GN=ACTB PE=2 SV=2	0	66.93	EITALAPSTMK	Oxidation(M)@10		1176.61	589.31	1176.61	589.31	2	9
90.36	73.33	Q6QAQ1	ACTB_PIG	Actin, cytoplasmic 1 OS=Sus scrofa GN=ACTB PE=2 SV=2	0	65.14	EITALAPSTMK	Dethiomethyl(M)@10		1112.61	371.877	1112.61	371.877	3	8
90.36	73.33	Q6QAQ1	ACTB_PIG	Actin, cytoplasmic 1 OS=Sus scrofa GN=ACTB PE=2 SV=2	0	64.21	EITALAPSTMK			1160.61	581.313	1160.61	581.313	2	7
90.36	73.33	Q6QAQ1	ACTB_PIG	Actin, cytoplasmic 1 OS=Sus scrofa GN=ACTB PE=2 SV=2	0	47.13	EITALAPSTMK			1160.61	581.314	1160.61	581.313	2	8
90.36	73.33	Q6QAQ1	ACTB_PIG	Actin, cytoplasmic 1 OS=Sus scrofa GN=ACTB PE=2 SV=2	0	39.7	EITALAPSTMK	Oxidation(M)@10		1176.61	589.311	1176.61	589.31	2	9
90.36	73.33	Q6QAQ1	ACTB_PIG	Actin, cytoplasmic 1 OS=Sus scrofa GN=ACTB PE=2 SV=2	0	36.83	EITALAPSTMK	Oxidation(M)@10		1176.61	589.312	1176.61	589.31	2	8
90.36	73.33	Q6QAQ1	ACTB_PIG	Actin, cytoplasmic 1 OS=Sus scrofa GN=ACTB PE=2 SV=2	0	36.68	EITALAPSTMK	Dethiomethyl(M)@10		1112.61	557.311	1112.61	557.311	2	6
90.36	73.33	Q6QAQ1	ACTB_PIG	Actin, cytoplasmic 1 OS=Sus scrofa GN=ACTB PE=2 SV=2	0	35.75	EITALAPSTMK	Dethiomethyl(M)@10		1112.61	371.878	1112.61	371.877	3	7
90.36	73.33	Q6QAQ1	ACTB_PIG	Actin, cytoplasmic 1 OS=Sus scrofa GN=ACTB PE=2 SV=2	0	24.5	EITALAPSTMK			1160.6	581.308	1160.61	581.313	2	6
90.36	73.33	Q6QAQ1	ACTB_PIG	Actin, cytoplasmic 1 OS=Sus scrofa GN=ACTB PE=2 SV=2	0	84.34	EKLCYVALDFEQEMATAASSSSLEK	Carboxymethyl(C)@4; Deoxy(D)@9; Deamidated(Q)@12	missed K-L@2	2792.29	931.771	2792.28	931.766	3	12
90.36	73.33	Q6QAQ1	ACTB_PIG	Actin, cytoplasmic 1 OS=Sus scrofa GN=ACTB PE=2 SV=2	0	21.07	EKLCYVALDFEQEMATAASSSSLEK	Acetyl@N-term; Carboxymethyl(C)@4	missed K-L@2	2849.31	950.777	2849.3	950.773	3	9
90.36	73.33	Q6QAQ1	ACTB_PIG	Actin, cytoplasmic 1 OS=Sus scrofa GN=ACTB PE=2 SV=2	0	20.91	EKLCYVALDFEQEMATAASSSSLEK	Acetyl@N-term; Carboxymethyl(C)@4	missed K-L@2	2849.31	950.777	2849.3	950.773	3	9
90.36	73.33	Q6QAQ1	ACTB_PIG	Actin, cytoplasmic 1 OS=Sus scrofa GN=ACTB PE=2 SV=2	0	71.08	ELPDGQVITIGNE		cleaved Y-E@N-term; cleaved E-R@C-term	1383.69	692.851	1383.69	692.851	2	9
90.36	73.33	Q6QAQ1	ACTB_PIG	Actin, cytoplasmic 1 OS=Sus scrofa GN=ACTB PE=2 SV=2	0	99	ELPDGQVITIGNER		cleaved Y-E@N-term	1539.79	770.902	1539.79	770.902	2	18
90.36	73.33	Q6QAQ1	ACTB_PIG	Actin, cytoplasmic 1 OS=Sus scrofa GN=ACTB PE=2 SV=2	0	99	ELPDGQVITIGNER	Deamidated(Q)@6	cleaved Y-E@N-term	1540.79	771.403	1540.77	771.394	2	18
90.36	73.33	Q6QAQ1	ACTB_PIG	Actin, cytoplasmic 1 OS=Sus scrofa GN=ACTB PE=2 SV=2	0	99	ELPDGQVITIGNER		cleaved Y-E@N-term	1539.79	770.903	1539.79	770.902	2	18
90.36	73.33	Q6QAQ1	ACTB_PIG	Actin, cytoplasmic 1 OS=Sus scrofa GN=ACTB PE=2 SV=2	0	99	ELPDGQVITIGNER		cleaved Y-E@N-term	1539.79	770.903	1539.79	770.902	2	19
90.36	73.33	Q6QAQ1	ACTB_PIG	Actin, cytoplasmic 1 OS=Sus scrofa GN=ACTB PE=2 SV=2	0	99	ELPDGQVITIGNER		cleaved Y-E@N-term	1539.79	770.902	1539.79	770.902	2	18
90.36	73.33	Q6QAQ1	ACTB_PIG	Actin, cytoplasmic 1 OS=Sus scrofa GN=ACTB PE=2 SV=2	0	99	ELPDGQVITIGNER		cleaved Y-E@N-term	1539.79	770.903	1539.79	770.902	2	10
90.36	73.33	Q6QAQ1	ACTB_PIG	Actin, cytoplasmic 1 OS=Sus scrofa GN=ACTB PE=2 SV=2	0	99	ELPDGQVITIGNER		cleaved Y-E@N-term	1539.79	770.902	1539.79	770.902	2	11
90.36	73.33	Q6QAQ1	ACTB_PIG	Actin, cytoplasmic 1 OS=Sus scrofa GN=ACTB PE=2 SV=2	0	99	ELPDGQVITIGNER		cleaved Y-E@N-term	1539.79	770.903	1539.79	770.902	2	13
90.36	73.33	Q6QAQ1	ACTB_PIG	Actin, cytoplasmic 1 OS=Sus scrofa GN=ACTB PE=2 SV=2	0	99	ELPDGQVITIGNER	Deamidated(N)@12	cleaved Y-E@N-term	1540.78	771.399	1540.77	771.394	2	13
90.36	73.33	Q6QAQ1	ACTB_PIG	Actin, cytoplasmic 1 OS=Sus scrofa GN=ACTB PE=2 SV=2	0	99	ELPDGQVITIGNER		cleaved Y-E@N-term	1539.79	770.902	1539.79	770.902	2	16
90.36	73.33	Q6QAQ1	ACTB_PIG	Actin, cytoplasmic 1 OS=Sus scrofa GN=ACTB PE=2 SV=2	0	99	ELPDGQVITIGNER		cleaved Y-E@N-term	1539.79	770.903	1539.79	770.902	2	11
90.36	73.33	Q6QAQ1	ACTB_PIG	Actin, cytoplasmic 1 OS=Sus scrofa GN=ACTB PE=2 SV=2	0	99	ELPDGQVITIGNER		cleaved Y-E@N-term	1539.79	770.9	1539.79	770.902	2	12
90.36	73.33	Q6QAQ1	ACTB_PIG	Actin, cytoplasmic 1 OS=Sus scrofa GN=ACTB PE=2 SV=2	0	96.74	ELPDGQVITIGNER		cleaved Y-E@N-term	1539.79	770.902	1539.79	770.902	2	11
90.36	73.33	Q6QAQ1	ACTB_PIG	Actin, cytoplasmic 1 OS=Sus scrofa GN=ACTB PE=2 SV=2	0	96.65	ELPDGQVITIGNER		cleaved Y-E@N-term	1539.79	770.9	1539.79	770.902	2	13
90.36	73.33	Q6QAQ1	ACTB_PIG	Actin, cytoplasmic 1 OS=Sus scrofa GN=ACTB PE=2 SV=2	0	95.65	ELPDGQVITIGNER		cleaved Y-E@N-term	1539.79	770.902	1539.79	770.902	2	11
90.36	73.33	Q6QAQ1	ACTB_PIG	Actin, cytoplasmic 1 OS=Sus scrofa GN=ACTB PE=2 SV=2	0	93.23	ELPDGQVITIGNER		cleaved Y-E@N-term	1539.79	770.902	1539.79	770.902	2	9
90.36	73.33	Q6QAQ1	ACTB_PIG	Actin, cytoplasmic 1 OS=Sus scrofa GN=ACTB PE=2 SV=2	0	80.02	ELPDGQVITIGNER		cleaved Y-E@N-term	1539.8	770.905	1539.79	770.902	2	8
90.36	73.33	Q6QAQ1	ACTB_PIG	Actin, cytoplasmic 1 OS=Sus scrofa GN=ACTB PE=2 SV=2	0	78.13	ELPDGQVITIGNER		cleaved Y-E@N-term	1539.79	770.902	1539.79	770.902	2	11
90.36	73.33	Q6QAQ1	ACTB_PIG	Actin, cytoplasmic 1 OS=Sus scrofa GN=ACTB PE=2 SV=2	0	67.79	ELPDGQVITIGNER	Deamidated(N)@12	cleaved Y-E@N-term	1540.78	771.398	1540.77	771.394	2	7
90.36	73.33	Q6QAQ1	ACTB_PIG	Actin, cytoplasmic 1 OS=Sus scrofa GN=ACTB PE=2 SV=2	0	66.9	ELPDGQVITIGNER		cleaved Y-E@N-term	1539.79	514.27	1539.79	514.27	3	10
90.36	73.33	Q6QAQ1	ACTB_PIG	Actin, cytoplasmic 1 OS=Sus scrofa GN=ACTB PE=2 SV=2	0	56.39	ELPDGQVITIGNER		cleaved Y-E@N-term	1539.79	770.903	1539.79	770.902	2	10
90.36	73.33	Q6QAQ1	ACTB_PIG	Actin, cytoplasmic 1 OS=Sus scrofa GN=ACTB PE=2 SV=2	0	46.57	ELPDGQVITIGNER		cleaved Y-E@N-term	1539.78	770.899	1539.79	770.902	2	8
90.36	73.33	Q6QAQ1	ACTB_PIG	Actin, cytoplasmic 1 OS=Sus scrofa GN=ACTB PE=2 SV=2	0	38.92	ELPDGQVITIGNER	Deamidated(Q)@6	cleaved Y-E@N-term	1540.8	771.405	1540.77	771.394	2	8
90.36	73.33	Q6QAQ1	ACTB_PIG	Actin, cytoplasmic 1 OS=Sus scrofa GN=ACTB PE=2 SV=2	0	99	FAGDDAPR		cleaved G-F@N-term	847.383	424.699	847.382	424.698	2	9
90.36	73.33	Q6QAQ1	ACTB_PIG	Actin, cytoplasmic 1 OS=Sus scrofa GN=ACTB PE=2 SV=2	0	99	FAGDDAPR		cleaved G-F@N-term	847.385	424.7	847.382	424.698	2	9
90.36	73.33	Q6QAQ1	ACTB_PIG	Actin, cytoplasmic 1 OS=Sus scrofa GN=ACTB PE=2 SV=2	0	98.88	FAGDDAPR		cleaved G-F@N-term	847.386	424.7	847.382	424.698	2	8
90.36	73.33	Q6QAQ1	ACTB_PIG	Actin, cytoplasmic 1 OS=Sus scrofa GN=ACTB PE=2 SV=2	0	98.46	FAGDDAPR		cleaved G-F@N-term	847.386	424.7	847.382	424.698	2	9
90.36	73.33	Q6QAQ1	ACTB_PIG	Actin, cytoplasmic 1 OS=Sus scrofa GN=ACTB PE=2 SV=2	0	98.46	FAGDDAPR		cleaved G-F@N-term	847.387	424.701	847.382	424.698	2	8
90.36	73.33	Q6QAQ1	ACTB_PIG	Actin, cytoplasmic 1 OS=Sus scrofa GN=ACTB PE=2 SV=2	0	97.4	FAGDDAPR		cleaved G-F@N-term	847.383	424.699	847.382	424.698	2	9
90.36	73.33	Q6QAQ1	ACTB_PIG	Actin, cytoplasmic 1 OS=Sus scrofa GN=ACTB PE=2 SV=2	0	97.4	FAGDDAPR		cleaved G-F@N-term	847.385	424.7	847.382	424.698	2	9
90.36	73.33	Q6QAQ1	ACTB_PIG	Actin, cytoplasmic 1 OS=Sus scrofa GN=ACTB PE=2 SV=2	0	94.86	FAGDDAPR		cleaved G-F@N-term	847.383	424.699	847.382	424.698	2	8
90.36	73.33	Q6QAQ1	ACTB_PIG	Actin, cytoplasmic 1 OS=Sus scrofa GN=ACTB PE=2 SV=2	0	88.55	FAGDDAPR		cleaved G-F@N-term	847.383	424.699	847.382	424.698	2	8
90.36	73.33	Q6QAQ1	ACTB_PIG	Actin, cytoplasmic 1 OS=Sus scrofa GN=ACTB PE=2 SV=2	0	88.01	FAGDDAPR		cleaved G-F@N-term	847.386	424.7	847.382	424.698	2	7
90.36	73.33	Q6QAQ1	ACTB_PIG	Actin, cytoplasmic 1 OS=Sus scrofa GN=ACTB PE=2 SV=2	0	61.41	FAGDDAPR		cleaved G-F@N-term	847.386	424.7	847.382	424.698	2	6
90.36	73.33	Q6QAQ1	ACTB_PIG	Actin, cytoplasmic 1 OS=Sus scrofa GN=ACTB PE=2 SV=2	0	95.35	FPSIVGR		cleaved V-F@N-term; cleaved R-P@C-term	774.439	388.227	774.439	388.227	2	8
90.36	73.33	Q6QAQ1	ACTB_PIG	Actin, cytoplasmic 1 OS=Sus scrofa GN=ACTB PE=2 SV=2	0	86.57	FPSIVGR		cleaved V-F@N-term; cleaved R-P@C-term	774.44	388.227	774.439	388.227	2	8
90.36	73.33	Q6QAQ1	ACTB_PIG	Actin, cytoplasmic 1 OS=Sus scrofa GN=ACTB PE=2 SV=2	0	75.46	FPSIVGR		cleaved V-F@N-term; cleaved R-P@C-term	774.439	388.227	774.439	388.227	2	6
90.36	73.33	Q6QAQ1	ACTB_PIG	Actin, cytoplasmic 1 OS=Sus scrofa GN=ACTB PE=2 SV=2	0	35.9	FPSIVGR		cleaved V-F@N-term; cleaved R-P@C-term	774.439	388.227	774.439	388.227	2	7
90.36	73.33	Q6QAQ1	ACTB_PIG	Actin, cytoplasmic 1 OS=Sus scrofa GN=ACTB PE=2 SV=2	0	26.36	FPSIVGR		cleaved V-F@N-term; cleaved R-P@C-term	774.439	388.227	774.439	388.227	2	6
90.36	73.33	Q6QAQ1	ACTB_PIG	Actin, cytoplasmic 1 OS=Sus scrofa GN=ACTB PE=2 SV=2	0	17.99	FPSIVGR		cleaved V-F@N-term; cleaved R-P@C-term	774.443	388.229	774.439	388.227	2	5
90.36	73.33	Q6QAQ1	ACTB_PIG	Actin, cytoplasmic 1 OS=Sus scrofa GN=ACTB PE=2 SV=2	0	71.5	FPSIVGRPR		cleaved V-F@N-term	1027.59	514.803	1027.59	514.804	2	9
90.36	73.33	Q6QAQ1	ACTB_PIG	Actin, cytoplasmic 1 OS=Sus scrofa GN=ACTB PE=2 SV=2	0	99	GFAGDDAPR		cleaved A-G@N-term	904.404	453.209	904.404	453.209	2	9
90.36	73.33	Q6QAQ1	ACTB_PIG	Actin, cytoplasmic 1 OS=Sus scrofa GN=ACTB PE=2 SV=2	0	99	GFAGDDAPR		cleaved A-G@N-term	904.404	453.209	904.404	453.209	2	10
90.36	73.33	Q6QAQ1	ACTB_PIG	Actin, cytoplasmic 1 OS=Sus scrofa GN=ACTB PE=2 SV=2	0	99	GFAGDDAPR		cleaved A-G@N-term	904.404	453.209	904.404	453.209	2	9
90.36	73.33	Q6QAQ1	ACTB_PIG	Actin, cytoplasmic 1 OS=Sus scrofa GN=ACTB PE=2 SV=2	0	99	GFAGDDAPR		cleaved A-G@N-term	904.404	453.209	904.404	453.209	2	8
90.36	73.33	Q6QAQ1	ACTB_PIG	Actin, cytoplasmic 1 OS=Sus scrofa GN=ACTB PE=2 SV=2	0	99	GFAGDDAPR		cleaved A-G@N-term	904.404	453.209	904.404	453.209	2	9
90.36	73.33	Q6QAQ1	ACTB_PIG	Actin, cytoplasmic 1 OS=Sus scrofa GN=ACTB PE=2 SV=2	0	99	GFAGDDAPR		cleaved A-G@N-term	904.407	453.211	904.404	453.209	2	9
90.36	73.33	Q6QAQ1	ACTB_PIG	Actin, cytoplasmic 1 OS=Sus scrofa GN=ACTB PE=2 SV=2	0	99	GFAGDDAPR		cleaved A-G@N-term	904.407	453.211	904.404	453.209	2	7
90.36	73.33	Q6QAQ1	ACTB_PIG	Actin, cytoplasmic 1 OS=Sus scrofa GN=ACTB PE=2 SV=2	0	99	GFAGDDAPR		cleaved A-G@N-term	904.409	453.212	904.404	453.209	2	8
90.36	73.33	Q6QAQ1	ACTB_PIG	Actin, cytoplasmic 1 OS=Sus scrofa GN=ACTB PE=2 SV=2	0	99	GFAGDDAPR		cleaved A-G@N-term	904.403	453.209	904.404	453.209	2	9
90.36	73.33	Q6QAQ1	ACTB_PIG	Actin, cytoplasmic 1 OS=Sus scrofa GN=ACTB PE=2 SV=2	0	99	GFAGDDAPR		cleaved A-G@N-term	904.405	453.21	904.404	453.209	2	9
90.36	73.33	Q6QAQ1	ACTB_PIG	Actin, cytoplasmic 1 OS=Sus scrofa GN=ACTB PE=2 SV=2	0	98.88	GFAGDDAPR		cleaved A-G@N-term	904.404	453.209	904.404	453.209	2	9
90.36	73.33	Q6QAQ1	ACTB_PIG	Actin, cytoplasmic 1 OS=Sus scrofa GN=ACTB PE=2 SV=2	0	98.68	GFAGDDAPR		cleaved A-G@N-term	904.4	453.207	904.404	453.209	2	9
90.36	73.33	Q6QAQ1	ACTB_PIG	Actin, cytoplasmic 1 OS=Sus scrofa GN=ACTB PE=2 SV=2	0	98.46	GFAGDDAPR		cleaved A-G@N-term	904.4	453.207	904.404	453.209	2	10
90.36	73.33	Q6QAQ1	ACTB_PIG	Actin, cytoplasmic 1 OS=Sus scrofa GN=ACTB PE=2 SV=2	0	97.69	GFAGDDAPR		cleaved A-G@N-term	904.406	453.21	904.404	453.209	2	9
90.36	73.33	Q6QAQ1	ACTB_PIG	Actin, cytoplasmic 1 OS=Sus scrofa GN=ACTB PE=2 SV=2	0	97.69	GFAGDDAPR		cleaved A-G@N-term	904.406	453.211	904.404	453.209	2	8
90.36	73.33	Q6QAQ1	ACTB_PIG	Actin, cytoplasmic 1 OS=Sus scrofa GN=ACTB PE=2 SV=2	0	93.56	GFAGDDAPR		cleaved A-G@N-term	904.404	453.209	904.404	453.209	2	9
90.36	73.33	Q6QAQ1	ACTB_PIG	Actin, cytoplasmic 1 OS=Sus scrofa GN=ACTB PE=2 SV=2	0	93.1	GFAGDDAPR		cleaved A-G@N-term	904.406	453.21	904.404	453.209	2	8
90.36	73.33	Q6QAQ1	ACTB_PIG	Actin, cytoplasmic 1 OS=Sus scrofa GN=ACTB PE=2 SV=2	0	89.61	GFAGDDAPR		cleaved A-G@N-term	904.4	453.207	904.404	453.209	2	10
90.36	73.33	Q6QAQ1	ACTB_PIG	Actin, cytoplasmic 1 OS=Sus scrofa GN=ACTB PE=2 SV=2	0	73.9	GFAGDDAPR		cleaved A-G@N-term	904.404	453.209	904.404	453.209	2	8
90.36	73.33	Q6QAQ1	ACTB_PIG	Actin, cytoplasmic 1 OS=Sus scrofa GN=ACTB PE=2 SV=2	0	70	GFAGDDAPR		cleaved A-G@N-term	904.421	453.218	904.404	453.209	2	7
90.36	73.33	Q6QAQ1	ACTB_PIG	Actin, cytoplasmic 1 OS=Sus scrofa GN=ACTB PE=2 SV=2	0	69.45	GFAGDDAPR		cleaved A-G@N-term	904.411	453.213	904.404	453.209	2	7
90.36	73.33	Q6QAQ1	ACTB_PIG	Actin, cytoplasmic 1 OS=Sus scrofa GN=ACTB PE=2 SV=2	0	69.45	GFAGDDAPR		cleaved A-G@N-term	904.406	453.21	904.404	453.209	2	7
90.36	73.33	Q6QAQ1	ACTB_PIG	Actin, cytoplasmic 1 OS=Sus scrofa GN=ACTB PE=2 SV=2	0	63.79	GFAGDDAPR		cleaved A-G@N-term	904.407	453.211	904.404	453.209	2	8
90.36	73.33	Q6QAQ1	ACTB_PIG	Actin, cytoplasmic 1 OS=Sus scrofa GN=ACTB PE=2 SV=2	0	50.4	GFAGDDAPR		cleaved A-G@N-term	904.407	453.211	904.404	453.209	2	6
90.36	73.33	Q6QAQ1	ACTB_PIG	Actin, cytoplasmic 1 OS=Sus scrofa GN=ACTB PE=2 SV=2	0	23.95	GFAGDDAPR		cleaved A-G@N-term	904.411	453.213	904.404	453.209	2	5
90.36	73.33	Q6QAQ1	ACTB_PIG	Actin, cytoplasmic 1 OS=Sus scrofa GN=ACTB PE=2 SV=2	0	99	GYSFTTTAER			1131.52	566.768	1131.52	566.767	2	12
90.36	73.33	Q6QAQ1	ACTB_PIG	Actin, cytoplasmic 1 OS=Sus scrofa GN=ACTB PE=2 SV=2	0	99	GYSFTTTAER			1131.52	566.767	1131.52	566.767	2	13
90.36	73.33	Q6QAQ1	ACTB_PIG	Actin, cytoplasmic 1 OS=Sus scrofa GN=ACTB PE=2 SV=2	0	99	GYSFTTTAER			1131.52	566.767	1131.52	566.767	2	12
90.36	73.33	Q6QAQ1	ACTB_PIG	Actin, cytoplasmic 1 OS=Sus scrofa GN=ACTB PE=2 SV=2	0	99	GYSFTTTAER			1131.52	566.767	1131.52	566.767	2	10
90.36	73.33	Q6QAQ1	ACTB_PIG	Actin, cytoplasmic 1 OS=Sus scrofa GN=ACTB PE=2 SV=2	0	99	GYSFTTTAER			1131.52	566.768	1131.52	566.767	2	10
90.36	73.33	Q6QAQ1	ACTB_PIG	Actin, cytoplasmic 1 OS=Sus scrofa GN=ACTB PE=2 SV=2	0	99	GYSFTTTAER			1131.52	566.768	1131.52	566.767	2	11
90.36	73.33	Q6QAQ1	ACTB_PIG	Actin, cytoplasmic 1 OS=Sus scrofa GN=ACTB PE=2 SV=2	0	99	GYSFTTTAER			1131.52	566.766	1131.52	566.767	2	12
90.36	73.33	Q6QAQ1	ACTB_PIG	Actin, cytoplasmic 1 OS=Sus scrofa GN=ACTB PE=2 SV=2	0	99	GYSFTTTAER			1131.52	566.769	1131.52	566.767	2	9
90.36	73.33	Q6QAQ1	ACTB_PIG	Actin, cytoplasmic 1 OS=Sus scrofa GN=ACTB PE=2 SV=2	0	99	GYSFTTTAER			1131.52	566.768	1131.52	566.767	2	11
90.36	73.33	Q6QAQ1	ACTB_PIG	Actin, cytoplasmic 1 OS=Sus scrofa GN=ACTB PE=2 SV=2	0	99	GYSFTTTAER			1131.52	566.768	1131.52	566.767	2	8
90.36	73.33	Q6QAQ1	ACTB_PIG	Actin, cytoplasmic 1 OS=Sus scrofa GN=ACTB PE=2 SV=2	0	98.89	GYSFTTTAER			1131.53	566.77	1131.52	566.767	2	10
90.36	73.33	Q6QAQ1	ACTB_PIG	Actin, cytoplasmic 1 OS=Sus scrofa GN=ACTB PE=2 SV=2	0	98.74	GYSFTTTAER			1131.53	566.77	1131.52	566.767	2	9
90.36	73.33	Q6QAQ1	ACTB_PIG	Actin, cytoplasmic 1 OS=Sus scrofa GN=ACTB PE=2 SV=2	0	98.13	GYSFTTTAER			1131.52	566.767	1131.52	566.767	2	12
90.36	73.33	Q6QAQ1	ACTB_PIG	Actin, cytoplasmic 1 OS=Sus scrofa GN=ACTB PE=2 SV=2	0	98.13	GYSFTTTAER			1131.52	566.767	1131.52	566.767	2	12
90.36	73.33	Q6QAQ1	ACTB_PIG	Actin, cytoplasmic 1 OS=Sus scrofa GN=ACTB PE=2 SV=2	0	98.01	GYSFTTTAER			1131.52	566.768	1131.52	566.767	2	11
90.36	73.33	Q6QAQ1	ACTB_PIG	Actin, cytoplasmic 1 OS=Sus scrofa GN=ACTB PE=2 SV=2	0	97.79	GYSFTTTAER			1131.52	566.767	1131.52	566.767	2	11
90.36	73.33	Q6QAQ1	ACTB_PIG	Actin, cytoplasmic 1 OS=Sus scrofa GN=ACTB PE=2 SV=2	0	97.17	GYSFTTTAER			1131.52	566.767	1131.52	566.767	2	11
90.36	73.33	Q6QAQ1	ACTB_PIG	Actin, cytoplasmic 1 OS=Sus scrofa GN=ACTB PE=2 SV=2	0	96.49	GYSFTTTAER			1131.52	566.768	1131.52	566.767	2	11
90.36	73.33	Q6QAQ1	ACTB_PIG	Actin, cytoplasmic 1 OS=Sus scrofa GN=ACTB PE=2 SV=2	0	96.4	GYSFTTTAER			1131.52	566.766	1131.52	566.767	2	9
90.36	73.33	Q6QAQ1	ACTB_PIG	Actin, cytoplasmic 1 OS=Sus scrofa GN=ACTB PE=2 SV=2	0	95.36	GYSFTTTAER			1131.52	566.767	1131.52	566.767	2	11
90.36	73.33	Q6QAQ1	ACTB_PIG	Actin, cytoplasmic 1 OS=Sus scrofa GN=ACTB PE=2 SV=2	0	95.36	GYSFTTTAER			1131.52	566.767	1131.52	566.767	2	10
90.36	73.33	Q6QAQ1	ACTB_PIG	Actin, cytoplasmic 1 OS=Sus scrofa GN=ACTB PE=2 SV=2	0	94.8	GYSFTTTAER			1131.52	566.768	1131.52	566.767	2	10
90.36	73.33	Q6QAQ1	ACTB_PIG	Actin, cytoplasmic 1 OS=Sus scrofa GN=ACTB PE=2 SV=2	0	94.6	GYSFTTTAER			1131.52	566.767	1131.52	566.767	2	11
90.36	73.33	Q6QAQ1	ACTB_PIG	Actin, cytoplasmic 1 OS=Sus scrofa GN=ACTB PE=2 SV=2	0	93.78	GYSFTTTAER			1131.52	566.767	1131.52	566.767	2	11
90.36	73.33	Q6QAQ1	ACTB_PIG	Actin, cytoplasmic 1 OS=Sus scrofa GN=ACTB PE=2 SV=2	0	93.57	GYSFTTTAER			1131.52	566.767	1131.52	566.767	2	11
90.36	73.33	Q6QAQ1	ACTB_PIG	Actin, cytoplasmic 1 OS=Sus scrofa GN=ACTB PE=2 SV=2	0	93.35	GYSFTTTAER			1131.52	566.767	1131.52	566.767	2	11
90.36	73.33	Q6QAQ1	ACTB_PIG	Actin, cytoplasmic 1 OS=Sus scrofa GN=ACTB PE=2 SV=2	0	92.67	GYSFTTTAER			1131.52	566.767	1131.52	566.767	2	11
90.36	73.33	Q6QAQ1	ACTB_PIG	Actin, cytoplasmic 1 OS=Sus scrofa GN=ACTB PE=2 SV=2	0	92.14	GYSFTTTAER			1131.52	566.767	1131.52	566.767	2	9
90.36	73.33	Q6QAQ1	ACTB_PIG	Actin, cytoplasmic 1 OS=Sus scrofa GN=ACTB PE=2 SV=2	0	89.98	GYSFTTTAER			1131.52	566.767	1131.52	566.767	2	10
90.36	73.33	Q6QAQ1	ACTB_PIG	Actin, cytoplasmic 1 OS=Sus scrofa GN=ACTB PE=2 SV=2	0	73.01	GYSFTTTAER			1131.52	566.767	1131.52	566.767	2	7
90.36	73.33	Q6QAQ1	ACTB_PIG	Actin, cytoplasmic 1 OS=Sus scrofa GN=ACTB PE=2 SV=2	0	71.02	GYSFTTTAER			1131.52	566.768	1131.52	566.767	2	7
90.36	73.33	Q6QAQ1	ACTB_PIG	Actin, cytoplasmic 1 OS=Sus scrofa GN=ACTB PE=2 SV=2	0	62.25	GYSFTTTAER			1131.57	566.791	1131.52	566.767	2	10
90.36	73.33	Q6QAQ1	ACTB_PIG	Actin, cytoplasmic 1 OS=Sus scrofa GN=ACTB PE=2 SV=2	0	18.16	GYSFTTTAER			1131.53	566.775	1131.52	566.767	2	8
90.36	73.33	Q6QAQ1	ACTB_PIG	Actin, cytoplasmic 1 OS=Sus scrofa GN=ACTB PE=2 SV=2	0	79.2	HHTFYNELR		cleaved W-H@N-term	1215.61	406.212	1215.58	406.2	3	7
90.36	73.33	Q6QAQ1	ACTB_PIG	Actin, cytoplasmic 1 OS=Sus scrofa GN=ACTB PE=2 SV=2	0	99	HQGVMVGMGQ		cleaved Q-K@C-term	1042.47	522.241	1042.47	522.242	2	10
90.36	73.33	Q6QAQ1	ACTB_PIG	Actin, cytoplasmic 1 OS=Sus scrofa GN=ACTB PE=2 SV=2	0	99	HQGVMVGMGQK			1170.56	586.289	1170.56	586.289	2	19
90.36	73.33	Q6QAQ1	ACTB_PIG	Actin, cytoplasmic 1 OS=Sus scrofa GN=ACTB PE=2 SV=2	0	99	HQGVMVGMGQK			1170.56	586.289	1170.56	586.289	2	19
90.36	73.33	Q6QAQ1	ACTB_PIG	Actin, cytoplasmic 1 OS=Sus scrofa GN=ACTB PE=2 SV=2	0	99	HQGVMVGMGQK			1170.56	586.289	1170.56	586.289	2	16
90.36	73.33	Q6QAQ1	ACTB_PIG	Actin, cytoplasmic 1 OS=Sus scrofa GN=ACTB PE=2 SV=2	0	99	HQGVMVGMGQK			1170.56	586.288	1170.56	586.289	2	17
90.36	73.33	Q6QAQ1	ACTB_PIG	Actin, cytoplasmic 1 OS=Sus scrofa GN=ACTB PE=2 SV=2	0	99	HQGVMVGMGQK			1170.56	586.288	1170.56	586.289	2	17
90.36	73.33	Q6QAQ1	ACTB_PIG	Actin, cytoplasmic 1 OS=Sus scrofa GN=ACTB PE=2 SV=2	0	99	HQGVMVGMGQK			1170.56	586.288	1170.56	586.289	2	15
90.36	73.33	Q6QAQ1	ACTB_PIG	Actin, cytoplasmic 1 OS=Sus scrofa GN=ACTB PE=2 SV=2	0	99	HQGVMVGMGQK			1170.56	586.288	1170.56	586.289	2	17
90.36	73.33	Q6QAQ1	ACTB_PIG	Actin, cytoplasmic 1 OS=Sus scrofa GN=ACTB PE=2 SV=2	0	99	HQGVMVGMGQK			1170.57	586.29	1170.56	586.289	2	14
90.36	73.33	Q6QAQ1	ACTB_PIG	Actin, cytoplasmic 1 OS=Sus scrofa GN=ACTB PE=2 SV=2	0	99	HQGVMVGMGQK			1170.57	586.29	1170.56	586.289	2	16
90.36	73.33	Q6QAQ1	ACTB_PIG	Actin, cytoplasmic 1 OS=Sus scrofa GN=ACTB PE=2 SV=2	0	99	HQGVMVGMGQK			1170.57	586.29	1170.56	586.289	2	14
90.36	73.33	Q6QAQ1	ACTB_PIG	Actin, cytoplasmic 1 OS=Sus scrofa GN=ACTB PE=2 SV=2	0	99	HQGVMVGMGQK			1170.57	586.29	1170.56	586.289	2	17
90.36	73.33	Q6QAQ1	ACTB_PIG	Actin, cytoplasmic 1 OS=Sus scrofa GN=ACTB PE=2 SV=2	0	99	HQGVMVGMGQK			1170.56	586.288	1170.56	586.289	2	14
90.36	73.33	Q6QAQ1	ACTB_PIG	Actin, cytoplasmic 1 OS=Sus scrofa GN=ACTB PE=2 SV=2	0	99	HQGVMVGMGQK			1170.56	586.288	1170.56	586.289	2	15
90.36	73.33	Q6QAQ1	ACTB_PIG	Actin, cytoplasmic 1 OS=Sus scrofa GN=ACTB PE=2 SV=2	0	99	HQGVMVGMGQK			1170.57	586.293	1170.56	586.289	2	14
90.36	73.33	Q6QAQ1	ACTB_PIG	Actin, cytoplasmic 1 OS=Sus scrofa GN=ACTB PE=2 SV=2	0	99	HQGVMVGMGQK			1170.56	586.29	1170.56	586.289	2	14
90.36	73.33	Q6QAQ1	ACTB_PIG	Actin, cytoplasmic 1 OS=Sus scrofa GN=ACTB PE=2 SV=2	0	99	HQGVMVGMGQK			1170.56	586.288	1170.56	586.289	2	13
90.36	73.33	Q6QAQ1	ACTB_PIG	Actin, cytoplasmic 1 OS=Sus scrofa GN=ACTB PE=2 SV=2	0	99	HQGVMVGMGQK			1170.56	586.288	1170.56	586.289	2	14
90.36	73.33	Q6QAQ1	ACTB_PIG	Actin, cytoplasmic 1 OS=Sus scrofa GN=ACTB PE=2 SV=2	0	99	HQGVMVGMGQK			1170.56	586.288	1170.56	586.289	2	13
90.36	73.33	Q6QAQ1	ACTB_PIG	Actin, cytoplasmic 1 OS=Sus scrofa GN=ACTB PE=2 SV=2	0	99	HQGVMVGMGQK			1170.56	586.289	1170.56	586.289	2	14
90.36	73.33	Q6QAQ1	ACTB_PIG	Actin, cytoplasmic 1 OS=Sus scrofa GN=ACTB PE=2 SV=2	0	99	HQGVMVGMGQK			1170.56	586.288	1170.56	586.289	2	16
90.36	73.33	Q6QAQ1	ACTB_PIG	Actin, cytoplasmic 1 OS=Sus scrofa GN=ACTB PE=2 SV=2	0	99	HQGVMVGMGQK			1170.57	586.29	1170.56	586.289	2	12
90.36	73.33	Q6QAQ1	ACTB_PIG	Actin, cytoplasmic 1 OS=Sus scrofa GN=ACTB PE=2 SV=2	0	99	HQGVMVGMGQK			1170.57	391.197	1170.56	391.195	3	13
90.36	73.33	Q6QAQ1	ACTB_PIG	Actin, cytoplasmic 1 OS=Sus scrofa GN=ACTB PE=2 SV=2	0	99	HQGVMVGMGQK			1170.56	391.195	1170.56	391.195	3	11
90.36	73.33	Q6QAQ1	ACTB_PIG	Actin, cytoplasmic 1 OS=Sus scrofa GN=ACTB PE=2 SV=2	0	99	HQGVMVGMGQK	Deamidated(Q)@2		1171.57	586.79	1171.55	586.781	2	8
90.36	73.33	Q6QAQ1	ACTB_PIG	Actin, cytoplasmic 1 OS=Sus scrofa GN=ACTB PE=2 SV=2	0	99	HQGVMVGMGQK			1170.56	586.289	1170.56	586.289	2	14
90.36	73.33	Q6QAQ1	ACTB_PIG	Actin, cytoplasmic 1 OS=Sus scrofa GN=ACTB PE=2 SV=2	0	99	HQGVMVGMGQK			1170.57	391.197	1170.56	391.195	3	12
90.36	73.33	Q6QAQ1	ACTB_PIG	Actin, cytoplasmic 1 OS=Sus scrofa GN=ACTB PE=2 SV=2	0	99	HQGVMVGMGQK			1170.56	391.195	1170.56	391.195	3	13
90.36	73.33	Q6QAQ1	ACTB_PIG	Actin, cytoplasmic 1 OS=Sus scrofa GN=ACTB PE=2 SV=2	0	99	HQGVMVGMGQK			1170.57	391.196	1170.56	391.195	3	12
90.36	73.33	Q6QAQ1	ACTB_PIG	Actin, cytoplasmic 1 OS=Sus scrofa GN=ACTB PE=2 SV=2	0	99	HQGVMVGMGQK			1170.56	391.195	1170.56	391.195	3	13
90.36	73.33	Q6QAQ1	ACTB_PIG	Actin, cytoplasmic 1 OS=Sus scrofa GN=ACTB PE=2 SV=2	0	99	HQGVMVGMGQK			1170.57	391.197	1170.56	391.195	3	11
90.36	73.33	Q6QAQ1	ACTB_PIG	Actin, cytoplasmic 1 OS=Sus scrofa GN=ACTB PE=2 SV=2	0	99	HQGVMVGMGQK			1170.56	391.195	1170.56	391.195	3	13
90.36	73.33	Q6QAQ1	ACTB_PIG	Actin, cytoplasmic 1 OS=Sus scrofa GN=ACTB PE=2 SV=2	0	99	HQGVMVGMGQK			1170.56	391.195	1170.56	391.195	3	13
90.36	73.33	Q6QAQ1	ACTB_PIG	Actin, cytoplasmic 1 OS=Sus scrofa GN=ACTB PE=2 SV=2	0	99	HQGVMVGMGQK			1170.57	391.198	1170.56	391.195	3	12
90.36	73.33	Q6QAQ1	ACTB_PIG	Actin, cytoplasmic 1 OS=Sus scrofa GN=ACTB PE=2 SV=2	0	99	HQGVMVGMGQK			1170.56	391.195	1170.56	391.195	3	14
90.36	73.33	Q6QAQ1	ACTB_PIG	Actin, cytoplasmic 1 OS=Sus scrofa GN=ACTB PE=2 SV=2	0	99	HQGVMVGMGQK			1170.56	391.195	1170.56	391.195	3	14
90.36	73.33	Q6QAQ1	ACTB_PIG	Actin, cytoplasmic 1 OS=Sus scrofa GN=ACTB PE=2 SV=2	0	99	HQGVMVGMGQK			1170.56	391.195	1170.56	391.195	3	12
90.36	73.33	Q6QAQ1	ACTB_PIG	Actin, cytoplasmic 1 OS=Sus scrofa GN=ACTB PE=2 SV=2	0	99	HQGVMVGMGQK			1170.57	586.292	1170.56	586.289	2	11
90.36	73.33	Q6QAQ1	ACTB_PIG	Actin, cytoplasmic 1 OS=Sus scrofa GN=ACTB PE=2 SV=2	0	99	HQGVMVGMGQK			1170.57	391.198	1170.56	391.195	3	9
90.36	73.33	Q6QAQ1	ACTB_PIG	Actin, cytoplasmic 1 OS=Sus scrofa GN=ACTB PE=2 SV=2	0	99	HQGVMVGMGQK			1170.56	586.289	1170.56	586.289	2	11
90.36	73.33	Q6QAQ1	ACTB_PIG	Actin, cytoplasmic 1 OS=Sus scrofa GN=ACTB PE=2 SV=2	0	99	HQGVMVGMGQK			1170.56	391.195	1170.56	391.195	3	12
90.36	73.33	Q6QAQ1	ACTB_PIG	Actin, cytoplasmic 1 OS=Sus scrofa GN=ACTB PE=2 SV=2	0	96.4	HQGVMVGMGQK			1170.57	586.29	1170.56	586.289	2	9
90.36	73.33	Q6QAQ1	ACTB_PIG	Actin, cytoplasmic 1 OS=Sus scrofa GN=ACTB PE=2 SV=2	0	84.67	HQGVMVGMGQK	Deamidated(Q)@10		1171.57	391.529	1171.55	391.523	3	9
90.36	73.33	Q6QAQ1	ACTB_PIG	Actin, cytoplasmic 1 OS=Sus scrofa GN=ACTB PE=2 SV=2	0	51.47	HQGVMVGMGQK			1170.57	586.292	1170.56	586.289	2	6
90.36	73.33	Q6QAQ1	ACTB_PIG	Actin, cytoplasmic 1 OS=Sus scrofa GN=ACTB PE=2 SV=2	0	99	IIAPPER			794.465	398.24	794.465	398.24	2	7
90.36	73.33	Q6QAQ1	ACTB_PIG	Actin, cytoplasmic 1 OS=Sus scrofa GN=ACTB PE=2 SV=2	0	99	IIAPPER			794.464	398.239	794.465	398.24	2	8
90.36	73.33	Q6QAQ1	ACTB_PIG	Actin, cytoplasmic 1 OS=Sus scrofa GN=ACTB PE=2 SV=2	0	99	IIAPPER			794.466	398.24	794.465	398.24	2	7
90.36	73.33	Q6QAQ1	ACTB_PIG	Actin, cytoplasmic 1 OS=Sus scrofa GN=ACTB PE=2 SV=2	0	98.62	IIAPPER			794.466	398.24	794.465	398.24	2	8
90.36	73.33	Q6QAQ1	ACTB_PIG	Actin, cytoplasmic 1 OS=Sus scrofa GN=ACTB PE=2 SV=2	0	98.62	IIAPPER			794.466	398.24	794.465	398.24	2	7
90.36	73.33	Q6QAQ1	ACTB_PIG	Actin, cytoplasmic 1 OS=Sus scrofa GN=ACTB PE=2 SV=2	0	97.79	IIAPPER			794.464	398.239	794.465	398.24	2	7
90.36	73.33	Q6QAQ1	ACTB_PIG	Actin, cytoplasmic 1 OS=Sus scrofa GN=ACTB PE=2 SV=2	0	97.67	IIAPPER			794.466	398.24	794.465	398.24	2	7
90.36	73.33	Q6QAQ1	ACTB_PIG	Actin, cytoplasmic 1 OS=Sus scrofa GN=ACTB PE=2 SV=2	0	96.69	IIAPPER			794.467	398.241	794.465	398.24	2	6
90.36	73.33	Q6QAQ1	ACTB_PIG	Actin, cytoplasmic 1 OS=Sus scrofa GN=ACTB PE=2 SV=2	0	95.25	IIAPPER			794.466	398.24	794.465	398.24	2	7
90.36	73.33	Q6QAQ1	ACTB_PIG	Actin, cytoplasmic 1 OS=Sus scrofa GN=ACTB PE=2 SV=2	0	82.98	IIAPPER			794.464	398.239	794.465	398.24	2	6
90.36	73.33	Q6QAQ1	ACTB_PIG	Actin, cytoplasmic 1 OS=Sus scrofa GN=ACTB PE=2 SV=2	0	72.04	IIAPPER			794.464	398.239	794.465	398.24	2	7
90.36	73.33	Q6QAQ1	ACTB_PIG	Actin, cytoplasmic 1 OS=Sus scrofa GN=ACTB PE=2 SV=2	0	42.42	IIAPPER			794.466	398.24	794.465	398.24	2	7
90.36	73.33	Q6QAQ1	ACTB_PIG	Actin, cytoplasmic 1 OS=Sus scrofa GN=ACTB PE=2 SV=2	0	33.71	IIAPPER			794.466	398.24	794.465	398.24	2	5
90.36	73.33	Q6QAQ1	ACTB_PIG	Actin, cytoplasmic 1 OS=Sus scrofa GN=ACTB PE=2 SV=2	0	99	IWHHTFYNEL		cleaved L-R@C-term	1358.64	680.328	1358.64	680.328	2	14
90.36	73.33	Q6QAQ1	ACTB_PIG	Actin, cytoplasmic 1 OS=Sus scrofa GN=ACTB PE=2 SV=2	0	99	IWHHTFYNEL		cleaved L-R@C-term	1358.64	680.328	1358.64	680.328	2	13
90.36	73.33	Q6QAQ1	ACTB_PIG	Actin, cytoplasmic 1 OS=Sus scrofa GN=ACTB PE=2 SV=2	0	99	IWHHTFYNEL		cleaved L-R@C-term	1358.64	680.327	1358.64	680.328	2	12
90.36	73.33	Q6QAQ1	ACTB_PIG	Actin, cytoplasmic 1 OS=Sus scrofa GN=ACTB PE=2 SV=2	0	98.77	IWHHTFYNEL		cleaved L-R@C-term	1358.64	453.888	1358.64	453.888	3	9
90.36	73.33	Q6QAQ1	ACTB_PIG	Actin, cytoplasmic 1 OS=Sus scrofa GN=ACTB PE=2 SV=2	0	90.71	IWHHTFYNEL		cleaved L-R@C-term	1358.64	453.887	1358.64	453.888	3	8
90.36	73.33	Q6QAQ1	ACTB_PIG	Actin, cytoplasmic 1 OS=Sus scrofa GN=ACTB PE=2 SV=2	0	74.66	IWHHTFYNEL		cleaved L-R@C-term	1358.64	680.328	1358.64	680.328	2	10
90.36	73.33	Q6QAQ1	ACTB_PIG	Actin, cytoplasmic 1 OS=Sus scrofa GN=ACTB PE=2 SV=2	0	70.4	IWHHTFYNEL		cleaved L-R@C-term	1358.64	680.327	1358.64	680.328	2	6
90.36	73.33	Q6QAQ1	ACTB_PIG	Actin, cytoplasmic 1 OS=Sus scrofa GN=ACTB PE=2 SV=2	0	69.73	IWHHTFYNEL		cleaved L-R@C-term	1358.64	680.327	1358.64	680.328	2	10
90.36	73.33	Q6QAQ1	ACTB_PIG	Actin, cytoplasmic 1 OS=Sus scrofa GN=ACTB PE=2 SV=2	0	67.94	IWHHTFYNEL		cleaved L-R@C-term	1358.64	680.327	1358.64	680.328	2	7
90.36	73.33	Q6QAQ1	ACTB_PIG	Actin, cytoplasmic 1 OS=Sus scrofa GN=ACTB PE=2 SV=2	0	58.61	IWHHTFYNEL		cleaved L-R@C-term	1358.65	453.889	1358.64	453.888	3	10
90.36	73.33	Q6QAQ1	ACTB_PIG	Actin, cytoplasmic 1 OS=Sus scrofa GN=ACTB PE=2 SV=2	0	54.74	IWHHTFYNEL		cleaved L-R@C-term	1358.64	680.327	1358.64	680.328	2	9
90.36	73.33	Q6QAQ1	ACTB_PIG	Actin, cytoplasmic 1 OS=Sus scrofa GN=ACTB PE=2 SV=2	0	54.45	IWHHTFYNEL		cleaved L-R@C-term	1358.64	680.328	1358.64	680.328	2	9
90.36	73.33	Q6QAQ1	ACTB_PIG	Actin, cytoplasmic 1 OS=Sus scrofa GN=ACTB PE=2 SV=2	0	36.64	IWHHTFYNEL	Carbamyl@N-term	cleaved L-R@C-term	1401.65	468.224	1401.65	468.223	3	7
90.36	73.33	Q6QAQ1	ACTB_PIG	Actin, cytoplasmic 1 OS=Sus scrofa GN=ACTB PE=2 SV=2	0	24.19	IWHHTFYNEL		cleaved L-R@C-term	1358.64	680.327	1358.64	680.328	2	8
90.36	73.33	Q6QAQ1	ACTB_PIG	Actin, cytoplasmic 1 OS=Sus scrofa GN=ACTB PE=2 SV=2	0	23	IWHHTFYNEL		cleaved L-R@C-term	1358.64	680.327	1358.64	680.328	2	6
90.36	73.33	Q6QAQ1	ACTB_PIG	Actin, cytoplasmic 1 OS=Sus scrofa GN=ACTB PE=2 SV=2	0	99	IWHHTFYNELR			1514.74	505.922	1514.74	505.921	3	17
90.36	73.33	Q6QAQ1	ACTB_PIG	Actin, cytoplasmic 1 OS=Sus scrofa GN=ACTB PE=2 SV=2	0	99	IWHHTFYNELR			1514.74	758.378	1514.74	758.378	2	10
90.36	73.33	Q6QAQ1	ACTB_PIG	Actin, cytoplasmic 1 OS=Sus scrofa GN=ACTB PE=2 SV=2	0	99	IWHHTFYNELR			1514.74	379.693	1514.74	379.693	4	12
90.36	73.33	Q6QAQ1	ACTB_PIG	Actin, cytoplasmic 1 OS=Sus scrofa GN=ACTB PE=2 SV=2	0	99	IWHHTFYNELR	Deamidated(N)@8		1515.74	506.255	1515.73	506.249	3	12
90.36	73.33	Q6QAQ1	ACTB_PIG	Actin, cytoplasmic 1 OS=Sus scrofa GN=ACTB PE=2 SV=2	0	99	IWHHTFYNELR			1514.74	505.922	1514.74	505.921	3	17
90.36	73.33	Q6QAQ1	ACTB_PIG	Actin, cytoplasmic 1 OS=Sus scrofa GN=ACTB PE=2 SV=2	0	99	IWHHTFYNELR			1514.74	505.922	1514.74	505.921	3	9
90.36	73.33	Q6QAQ1	ACTB_PIG	Actin, cytoplasmic 1 OS=Sus scrofa GN=ACTB PE=2 SV=2	0	99	IWHHTFYNELR			1514.74	505.922	1514.74	505.921	3	18
90.36	73.33	Q6QAQ1	ACTB_PIG	Actin, cytoplasmic 1 OS=Sus scrofa GN=ACTB PE=2 SV=2	0	99	IWHHTFYNELR			1514.74	505.922	1514.74	505.921	3	15
90.36	73.33	Q6QAQ1	ACTB_PIG	Actin, cytoplasmic 1 OS=Sus scrofa GN=ACTB PE=2 SV=2	0	99	IWHHTFYNELR			1514.74	505.922	1514.74	505.921	3	16
90.36	73.33	Q6QAQ1	ACTB_PIG	Actin, cytoplasmic 1 OS=Sus scrofa GN=ACTB PE=2 SV=2	0	99	IWHHTFYNELR			1514.74	505.921	1514.74	505.921	3	15
90.36	73.33	Q6QAQ1	ACTB_PIG	Actin, cytoplasmic 1 OS=Sus scrofa GN=ACTB PE=2 SV=2	0	99	IWHHTFYNELR	Deamidated(N)@8		1515.73	506.252	1515.73	506.249	3	13
90.36	73.33	Q6QAQ1	ACTB_PIG	Actin, cytoplasmic 1 OS=Sus scrofa GN=ACTB PE=2 SV=2	0	99	IWHHTFYNELR			1514.74	758.378	1514.74	758.378	2	17
90.36	73.33	Q6QAQ1	ACTB_PIG	Actin, cytoplasmic 1 OS=Sus scrofa GN=ACTB PE=2 SV=2	0	99	IWHHTFYNELR			1514.74	505.922	1514.74	505.921	3	16
90.36	73.33	Q6QAQ1	ACTB_PIG	Actin, cytoplasmic 1 OS=Sus scrofa GN=ACTB PE=2 SV=2	0	99	IWHHTFYNELR			1514.74	505.922	1514.74	505.921	3	11
90.36	73.33	Q6QAQ1	ACTB_PIG	Actin, cytoplasmic 1 OS=Sus scrofa GN=ACTB PE=2 SV=2	0	99	IWHHTFYNELR			1514.74	758.378	1514.74	758.378	2	13
90.36	73.33	Q6QAQ1	ACTB_PIG	Actin, cytoplasmic 1 OS=Sus scrofa GN=ACTB PE=2 SV=2	0	99	IWHHTFYNELR			1514.74	758.379	1514.74	758.378	2	12
90.36	73.33	Q6QAQ1	ACTB_PIG	Actin, cytoplasmic 1 OS=Sus scrofa GN=ACTB PE=2 SV=2	0	99	IWHHTFYNELR			1514.74	758.378	1514.74	758.378	2	13
90.36	73.33	Q6QAQ1	ACTB_PIG	Actin, cytoplasmic 1 OS=Sus scrofa GN=ACTB PE=2 SV=2	0	99	IWHHTFYNELR			1514.74	758.378	1514.74	758.378	2	12
90.36	73.33	Q6QAQ1	ACTB_PIG	Actin, cytoplasmic 1 OS=Sus scrofa GN=ACTB PE=2 SV=2	0	99	IWHHTFYNELR			1514.74	758.379	1514.74	758.378	2	13
90.36	73.33	Q6QAQ1	ACTB_PIG	Actin, cytoplasmic 1 OS=Sus scrofa GN=ACTB PE=2 SV=2	0	99	IWHHTFYNELR			1514.74	758.378	1514.74	758.378	2	13
90.36	73.33	Q6QAQ1	ACTB_PIG	Actin, cytoplasmic 1 OS=Sus scrofa GN=ACTB PE=2 SV=2	0	99	IWHHTFYNELR			1514.74	758.378	1514.74	758.378	2	12
90.36	73.33	Q6QAQ1	ACTB_PIG	Actin, cytoplasmic 1 OS=Sus scrofa GN=ACTB PE=2 SV=2	0	98.99	IWHHTFYNELR			1514.74	505.922	1514.74	505.921	3	10
90.36	73.33	Q6QAQ1	ACTB_PIG	Actin, cytoplasmic 1 OS=Sus scrofa GN=ACTB PE=2 SV=2	0	98.91	IWHHTFYNELR			1514.74	758.378	1514.74	758.378	2	9
90.36	73.33	Q6QAQ1	ACTB_PIG	Actin, cytoplasmic 1 OS=Sus scrofa GN=ACTB PE=2 SV=2	0	98.83	IWHHTFYNELR			1514.74	505.921	1514.74	505.921	3	11
90.36	73.33	Q6QAQ1	ACTB_PIG	Actin, cytoplasmic 1 OS=Sus scrofa GN=ACTB PE=2 SV=2	0	98.55	IWHHTFYNELR			1514.74	505.922	1514.74	505.921	3	9
90.36	73.33	Q6QAQ1	ACTB_PIG	Actin, cytoplasmic 1 OS=Sus scrofa GN=ACTB PE=2 SV=2	0	98.39	IWHHTFYNELR			1514.74	758.378	1514.74	758.378	2	7
90.36	73.33	Q6QAQ1	ACTB_PIG	Actin, cytoplasmic 1 OS=Sus scrofa GN=ACTB PE=2 SV=2	0	98.14	IWHHTFYNELR			1514.74	505.922	1514.74	505.921	3	11
90.36	73.33	Q6QAQ1	ACTB_PIG	Actin, cytoplasmic 1 OS=Sus scrofa GN=ACTB PE=2 SV=2	0	98.14	IWHHTFYNELR			1514.74	758.378	1514.74	758.378	2	12
90.36	73.33	Q6QAQ1	ACTB_PIG	Actin, cytoplasmic 1 OS=Sus scrofa GN=ACTB PE=2 SV=2	0	95.78	IWHHTFYNELR			1514.74	505.922	1514.74	505.921	3	11
90.36	73.33	Q6QAQ1	ACTB_PIG	Actin, cytoplasmic 1 OS=Sus scrofa GN=ACTB PE=2 SV=2	0	94.65	IWHHTFYNELR			1514.74	758.378	1514.74	758.378	2	7
90.36	73.33	Q6QAQ1	ACTB_PIG	Actin, cytoplasmic 1 OS=Sus scrofa GN=ACTB PE=2 SV=2	0	92.94	IWHHTFYNELR			1514.74	758.379	1514.74	758.378	2	9
90.36	73.33	Q6QAQ1	ACTB_PIG	Actin, cytoplasmic 1 OS=Sus scrofa GN=ACTB PE=2 SV=2	0	92.15	IWHHTFYNELR	Carbamyl@N-term; Methyl(H)@3		1571.76	524.929	1571.76	524.928	3	13
90.36	73.33	Q6QAQ1	ACTB_PIG	Actin, cytoplasmic 1 OS=Sus scrofa GN=ACTB PE=2 SV=2	0	90.03	IWHHTFYNELR			1514.74	379.693	1514.74	379.693	4	11
90.36	73.33	Q6QAQ1	ACTB_PIG	Actin, cytoplasmic 1 OS=Sus scrofa GN=ACTB PE=2 SV=2	0	89.61	IWHHTFYNELR	Trp->Kynurenin(W)@2; Dehydrated(T)@5		1500.73	751.37	1500.73	751.37	2	13
90.36	73.33	Q6QAQ1	ACTB_PIG	Actin, cytoplasmic 1 OS=Sus scrofa GN=ACTB PE=2 SV=2	0	88.54	IWHHTFYNELR			1514.74	505.921	1514.74	505.921	3	10
90.36	73.33	Q6QAQ1	ACTB_PIG	Actin, cytoplasmic 1 OS=Sus scrofa GN=ACTB PE=2 SV=2	0	82.98	IWHHTFYNELR			1514.74	505.922	1514.74	505.921	3	10
90.36	73.33	Q6QAQ1	ACTB_PIG	Actin, cytoplasmic 1 OS=Sus scrofa GN=ACTB PE=2 SV=2	0	76.34	IWHHTFYNELR			1514.74	379.693	1514.74	379.693	4	10
90.36	73.33	Q6QAQ1	ACTB_PIG	Actin, cytoplasmic 1 OS=Sus scrofa GN=ACTB PE=2 SV=2	0	63.18	IWHHTFYNELR	Carbamyl@N-term; Methyl(H)@3		1571.76	786.888	1571.76	786.889	2	12
90.36	73.33	Q6QAQ1	ACTB_PIG	Actin, cytoplasmic 1 OS=Sus scrofa GN=ACTB PE=2 SV=2	0	59.8	IWHHTFYNELR			1514.74	379.693	1514.74	379.693	4	10
90.36	73.33	Q6QAQ1	ACTB_PIG	Actin, cytoplasmic 1 OS=Sus scrofa GN=ACTB PE=2 SV=2	0	49.39	IWHHTFYNELR	Carbamyl@N-term		1557.75	520.257	1557.75	520.257	3	10
90.36	73.33	Q6QAQ1	ACTB_PIG	Actin, cytoplasmic 1 OS=Sus scrofa GN=ACTB PE=2 SV=2	0	44.13	IWHHTFYNELR			1514.75	505.923	1514.74	505.921	3	9
90.36	73.33	Q6QAQ1	ACTB_PIG	Actin, cytoplasmic 1 OS=Sus scrofa GN=ACTB PE=2 SV=2	0	41	IWHHTFYNELR	Carbamyl@N-term		1557.75	520.257	1557.75	520.257	3	10
90.36	73.33	Q6QAQ1	ACTB_PIG	Actin, cytoplasmic 1 OS=Sus scrofa GN=ACTB PE=2 SV=2	0	40.38	IWHHTFYNELR			1514.75	758.38	1514.74	758.378	2	8
90.36	73.33	Q6QAQ1	ACTB_PIG	Actin, cytoplasmic 1 OS=Sus scrofa GN=ACTB PE=2 SV=2	0	40.03	IWHHTFYNELR	Trp->Kynurenin(W)@2; Dehydrated(T)@5		1500.73	501.25	1500.73	501.249	3	11
90.36	73.33	Q6QAQ1	ACTB_PIG	Actin, cytoplasmic 1 OS=Sus scrofa GN=ACTB PE=2 SV=2	0	38.2	IWHHTFYNELR	Carbamyl@N-term		1557.75	520.256	1557.75	520.257	3	7
90.36	73.33	Q6QAQ1	ACTB_PIG	Actin, cytoplasmic 1 OS=Sus scrofa GN=ACTB PE=2 SV=2	0	35.13	IWHHTFYNELR	Trp->Kynurenin(W)@2; Dehydrated(T)@5		1500.73	751.37	1500.73	751.37	2	11
90.36	73.33	Q6QAQ1	ACTB_PIG	Actin, cytoplasmic 1 OS=Sus scrofa GN=ACTB PE=2 SV=2	0	35.13	IWHHTFYNELR	Trp->Kynurenin(W)@2; Dehydrated(T)@5		1500.73	501.25	1500.73	501.249	3	11
90.36	73.33	Q6QAQ1	ACTB_PIG	Actin, cytoplasmic 1 OS=Sus scrofa GN=ACTB PE=2 SV=2	0	33.11	IWHHTFYNELR			1514.74	758.378	1514.74	758.378	2	8
90.36	73.33	Q6QAQ1	ACTB_PIG	Actin, cytoplasmic 1 OS=Sus scrofa GN=ACTB PE=2 SV=2	0	32.48	IWHHTFYNELR			1514.74	505.922	1514.74	505.921	3	7
90.36	73.33	Q6QAQ1	ACTB_PIG	Actin, cytoplasmic 1 OS=Sus scrofa GN=ACTB PE=2 SV=2	0	24.47	IWHHTFYNELR	Trp->Kynurenin(W)@2; Dehydrated(T)@5		1500.73	501.25	1500.73	501.249	3	11
90.36	73.33	Q6QAQ1	ACTB_PIG	Actin, cytoplasmic 1 OS=Sus scrofa GN=ACTB PE=2 SV=2	0	24.44	IWHHTFYNELR			1514.74	505.922	1514.74	505.921	3	6
90.36	73.33	Q6QAQ1	ACTB_PIG	Actin, cytoplasmic 1 OS=Sus scrofa GN=ACTB PE=2 SV=2	0	54.49	IWHHTFYNELRVAPEEHPVLLTEAPLNPK	Carboxymethyl@N-term; Dioxidation(W)@2	missed R-V@11	3539.79	1180.94	3539.78	1180.94	3	12
90.36	73.33	Q6QAQ1	ACTB_PIG	Actin, cytoplasmic 1 OS=Sus scrofa GN=ACTB PE=2 SV=2	0	20.13	IWHHTFYNELRVAPEEHPVLLTEAPLNPK	Carboxymethyl@N-term; Dioxidation(W)@2	missed R-V@11	3539.79	1180.94	3539.78	1180.94	3	11
90.36	73.33	Q6QAQ1	ACTB_PIG	Actin, cytoplasmic 1 OS=Sus scrofa GN=ACTB PE=2 SV=2	0	99	KDLYANTVLSGGTTMYPGIADR	Oxidation(M)@15	missed K-D@1	2358.16	787.059	2358.15	787.058	3	21
90.36	73.33	Q6QAQ1	ACTB_PIG	Actin, cytoplasmic 1 OS=Sus scrofa GN=ACTB PE=2 SV=2	0	99	KDLYANTVLSGGTTMYPGIADR		missed K-D@1	2342.16	1172.09	2342.16	1172.09	2	15
90.36	73.33	Q6QAQ1	ACTB_PIG	Actin, cytoplasmic 1 OS=Sus scrofa GN=ACTB PE=2 SV=2	0	99	KDLYANTVLSGGTTMYPGIADR	Oxidation(M)@15	missed K-D@1	2358.15	787.058	2358.15	787.058	3	13
90.36	73.33	Q6QAQ1	ACTB_PIG	Actin, cytoplasmic 1 OS=Sus scrofa GN=ACTB PE=2 SV=2	0	99	KDLYANTVLSGGTTMYPGIADR		missed K-D@1	2342.16	1172.09	2342.16	1172.09	2	16
90.36	73.33	Q6QAQ1	ACTB_PIG	Actin, cytoplasmic 1 OS=Sus scrofa GN=ACTB PE=2 SV=2	0	99	KDLYANTVLSGGTTMYPGIADR	Oxidation(M)@15	missed K-D@1	2358.16	787.061	2358.15	787.058	3	14
90.36	73.33	Q6QAQ1	ACTB_PIG	Actin, cytoplasmic 1 OS=Sus scrofa GN=ACTB PE=2 SV=2	0	99	KDLYANTVLSGGTTMYPGIADR		missed K-D@1	2342.16	781.726	2342.16	781.727	3	23
90.36	73.33	Q6QAQ1	ACTB_PIG	Actin, cytoplasmic 1 OS=Sus scrofa GN=ACTB PE=2 SV=2	0	99	KDLYANTVLSGGTTMYPGIADR		missed K-D@1	2342.16	781.726	2342.16	781.727	3	23
90.36	73.33	Q6QAQ1	ACTB_PIG	Actin, cytoplasmic 1 OS=Sus scrofa GN=ACTB PE=2 SV=2	0	99	KDLYANTVLSGGTTMYPGIADR		missed K-D@1	2342.16	1172.09	2342.16	1172.09	2	11
90.36	73.33	Q6QAQ1	ACTB_PIG	Actin, cytoplasmic 1 OS=Sus scrofa GN=ACTB PE=2 SV=2	0	99	KDLYANTVLSGGTTMYPGIADR	Oxidation(M)@15	missed K-D@1	2358.15	787.058	2358.15	787.058	3	16
90.36	73.33	Q6QAQ1	ACTB_PIG	Actin, cytoplasmic 1 OS=Sus scrofa GN=ACTB PE=2 SV=2	0	99	KDLYANTVLSGGTTMYPGIADR		missed K-D@1	2342.16	1172.09	2342.16	1172.09	2	15
90.36	73.33	Q6QAQ1	ACTB_PIG	Actin, cytoplasmic 1 OS=Sus scrofa GN=ACTB PE=2 SV=2	0	99	KDLYANTVLSGGTTMYPGIADR		missed K-D@1	2342.16	1172.09	2342.16	1172.09	2	19
90.36	73.33	Q6QAQ1	ACTB_PIG	Actin, cytoplasmic 1 OS=Sus scrofa GN=ACTB PE=2 SV=2	0	99	KDLYANTVLSGGTTMYPGIADR	Methyl(N)@6	missed K-D@1	2356.14	786.388	2356.17	786.398	3	16
90.36	73.33	Q6QAQ1	ACTB_PIG	Actin, cytoplasmic 1 OS=Sus scrofa GN=ACTB PE=2 SV=2	0	99	KDLYANTVLSGGTTMYPGIADR		missed K-D@1	2342.16	1172.09	2342.16	1172.09	2	19
90.36	73.33	Q6QAQ1	ACTB_PIG	Actin, cytoplasmic 1 OS=Sus scrofa GN=ACTB PE=2 SV=2	0	99	KDLYANTVLSGGTTMYPGIADR		missed K-D@1	2342.16	1172.09	2342.16	1172.09	2	21
90.36	73.33	Q6QAQ1	ACTB_PIG	Actin, cytoplasmic 1 OS=Sus scrofa GN=ACTB PE=2 SV=2	0	99	KDLYANTVLSGGTTMYPGIADR		missed K-D@1	2342.16	1172.09	2342.16	1172.09	2	20
90.36	73.33	Q6QAQ1	ACTB_PIG	Actin, cytoplasmic 1 OS=Sus scrofa GN=ACTB PE=2 SV=2	0	99	KDLYANTVLSGGTTMYPGIADR		missed K-D@1	2342.16	781.727	2342.16	781.727	3	24
90.36	73.33	Q6QAQ1	ACTB_PIG	Actin, cytoplasmic 1 OS=Sus scrofa GN=ACTB PE=2 SV=2	0	99	KDLYANTVLSGGTTMYPGIADR		missed K-D@1	2342.16	1172.09	2342.16	1172.09	2	20
90.36	73.33	Q6QAQ1	ACTB_PIG	Actin, cytoplasmic 1 OS=Sus scrofa GN=ACTB PE=2 SV=2	0	99	KDLYANTVLSGGTTMYPGIADR		missed K-D@1	2342.16	1172.09	2342.16	1172.09	2	15
90.36	73.33	Q6QAQ1	ACTB_PIG	Actin, cytoplasmic 1 OS=Sus scrofa GN=ACTB PE=2 SV=2	0	99	KDLYANTVLSGGTTMYPGIADR		missed K-D@1	2342.16	1172.09	2342.16	1172.09	2	16
90.36	73.33	Q6QAQ1	ACTB_PIG	Actin, cytoplasmic 1 OS=Sus scrofa GN=ACTB PE=2 SV=2	0	99	KDLYANTVLSGGTTMYPGIADR	Iodo(Y)@4	missed K-D@1	2468.06	823.692	2468.05	823.692	3	14
90.36	73.33	Q6QAQ1	ACTB_PIG	Actin, cytoplasmic 1 OS=Sus scrofa GN=ACTB PE=2 SV=2	0	99	KDLYANTVLSGGTTMYPGIADR		missed K-D@1	2342.16	1172.09	2342.16	1172.09	2	10
90.36	73.33	Q6QAQ1	ACTB_PIG	Actin, cytoplasmic 1 OS=Sus scrofa GN=ACTB PE=2 SV=2	0	99	KDLYANTVLSGGTTMYPGIADR	Dethiomethyl(M)@15	missed K-D@1	2294.15	574.546	2294.15	574.546	4	13
90.36	73.33	Q6QAQ1	ACTB_PIG	Actin, cytoplasmic 1 OS=Sus scrofa GN=ACTB PE=2 SV=2	0	99	KDLYANTVLSGGTTMYPGIADR	PyruvicAcidIminyl(K)@1; Oxidation(M)@15	missed K-D@1	2428.18	810.4	2428.16	810.393	3	15
90.36	73.33	Q6QAQ1	ACTB_PIG	Actin, cytoplasmic 1 OS=Sus scrofa GN=ACTB PE=2 SV=2	0	99	KDLYANTVLSGGTTMYPGIADR	Methyl(N)@6	missed K-D@1	2356.14	1179.08	2356.17	1179.09	2	12
90.36	73.33	Q6QAQ1	ACTB_PIG	Actin, cytoplasmic 1 OS=Sus scrofa GN=ACTB PE=2 SV=2	0	98.64	KDLYANTVLSGGTTMYPGIADR	Methyl(N)@6	missed K-D@1	2356.14	786.387	2356.17	786.398	3	15
90.36	73.33	Q6QAQ1	ACTB_PIG	Actin, cytoplasmic 1 OS=Sus scrofa GN=ACTB PE=2 SV=2	0	96.06	KDLYANTVLSGGTTMYPGIADR		missed K-D@1	2341.15	781.39	2342.16	781.727	3	13
90.36	73.33	Q6QAQ1	ACTB_PIG	Actin, cytoplasmic 1 OS=Sus scrofa GN=ACTB PE=2 SV=2	0	95.62	KDLYANTVLSGGTTMYPGIADR	Deamidated(N)@6	missed K-D@1	2343.16	782.061	2343.14	782.055	3	11
90.36	73.33	Q6QAQ1	ACTB_PIG	Actin, cytoplasmic 1 OS=Sus scrofa GN=ACTB PE=2 SV=2	0	94.46	KDLYANTVLSGGTTMYPGIADR	Dehydrated(D)@2; Oxidation(Y)@4; Oxidation(N)@6	missed K-D@1	2356.13	1179.07	2356.14	1179.08	2	13
90.36	73.33	Q6QAQ1	ACTB_PIG	Actin, cytoplasmic 1 OS=Sus scrofa GN=ACTB PE=2 SV=2	0	92.98	KDLYANTVLSGGTTMYPGIADR	Oxidation(M)@15	missed K-D@1	2358.15	787.059	2358.15	787.058	3	7
90.36	73.33	Q6QAQ1	ACTB_PIG	Actin, cytoplasmic 1 OS=Sus scrofa GN=ACTB PE=2 SV=2	0	92.85	KDLYANTVLSGGTTMYPGIADR	Oxidation(N)@6; Didehydro(T)@7	missed K-D@1	2356.14	1179.08	2356.14	1179.08	2	11
90.36	73.33	Q6QAQ1	ACTB_PIG	Actin, cytoplasmic 1 OS=Sus scrofa GN=ACTB PE=2 SV=2	0	90.36	KDLYANTVLSGGTTMYPGIADR	Oxidation(N)@6; Didehydro(T)@7	missed K-D@1	2356.13	786.385	2356.14	786.386	3	15
90.36	73.33	Q6QAQ1	ACTB_PIG	Actin, cytoplasmic 1 OS=Sus scrofa GN=ACTB PE=2 SV=2	0	87.5	KDLYANTVLSGGTTMYPGIADR	Methyl(N)@6	missed K-D@1	2356.14	786.389	2356.17	786.398	3	11
90.36	73.33	Q6QAQ1	ACTB_PIG	Actin, cytoplasmic 1 OS=Sus scrofa GN=ACTB PE=2 SV=2	0	84.17	KDLYANTVLSGGTTMYPGIADR	Deamidated(N)@6	missed K-D@1	2343.16	782.06	2343.14	782.055	3	10
90.36	73.33	Q6QAQ1	ACTB_PIG	Actin, cytoplasmic 1 OS=Sus scrofa GN=ACTB PE=2 SV=2	0	84.07	KDLYANTVLSGGTTMYPGIADR	Methyl(N)@6	missed K-D@1	2356.13	1179.07	2356.17	1179.09	2	14
90.36	73.33	Q6QAQ1	ACTB_PIG	Actin, cytoplasmic 1 OS=Sus scrofa GN=ACTB PE=2 SV=2	0	79.13	KDLYANTVLSGGTTMYPGIADR	PyruvicAcidIminyl(K)@1	missed K-D@1	2412.17	805.065	2412.16	805.062	3	9
90.36	73.33	Q6QAQ1	ACTB_PIG	Actin, cytoplasmic 1 OS=Sus scrofa GN=ACTB PE=2 SV=2	0	78.83	KDLYANTVLSGGTTMYPGIADR	Methyl(N)@6	missed K-D@1	2356.13	786.385	2356.17	786.398	3	14
90.36	73.33	Q6QAQ1	ACTB_PIG	Actin, cytoplasmic 1 OS=Sus scrofa GN=ACTB PE=2 SV=2	0	68.55	KDLYANTVLSGGTTMYPGIADR	Methyl(N)@6	missed K-D@1	2356.14	786.387	2356.17	786.398	3	10
90.36	73.33	Q6QAQ1	ACTB_PIG	Actin, cytoplasmic 1 OS=Sus scrofa GN=ACTB PE=2 SV=2	0	58.22	KDLYANTVLSGGTTMYPGIADR	Methyl(D)@2	missed K-D@1	2356.14	786.386	2356.17	786.398	3	9
90.36	73.33	Q6QAQ1	ACTB_PIG	Actin, cytoplasmic 1 OS=Sus scrofa GN=ACTB PE=2 SV=2	0	40.12	KDLYANTVLSGGTTMYPGIADR	Dethiomethyl(M)@15	missed K-D@1	2294.16	574.546	2294.15	574.546	4	8
90.36	73.33	Q6QAQ1	ACTB_PIG	Actin, cytoplasmic 1 OS=Sus scrofa GN=ACTB PE=2 SV=2	0	37.55	KDLYANTVLSGGTTMYPGIADR	Hex(N)@6; Dethiomethyl(M)@15	missed K-D@1	2456.21	819.743	2456.21	819.743	3	12
90.36	73.33	Q6QAQ1	ACTB_PIG	Actin, cytoplasmic 1 OS=Sus scrofa GN=ACTB PE=2 SV=2	0	36.46	KDLYANTVLSGGTTMYPGIADR		missed K-D@1	2342.16	781.727	2342.16	781.727	3	8
90.36	73.33	Q6QAQ1	ACTB_PIG	Actin, cytoplasmic 1 OS=Sus scrofa GN=ACTB PE=2 SV=2	0	31.45	KDLYANTVLSGGTTMYPGIADR	Carboxymethyl@N-term	missed K-D@1	2400.18	801.067	2400.16	801.062	3	9
90.36	73.33	Q6QAQ1	ACTB_PIG	Actin, cytoplasmic 1 OS=Sus scrofa GN=ACTB PE=2 SV=2	0	99	LCYVALDFEQEMATAASSSSLEK	Carboxymethyl(C)@2		2549.17	850.73	2550.15	851.057	3	14
90.36	73.33	Q6QAQ1	ACTB_PIG	Actin, cytoplasmic 1 OS=Sus scrofa GN=ACTB PE=2 SV=2	0	99	LCYVALDFEQEMATAASSSSLEK	Carboxymethyl(C)@2		2549.17	850.73	2550.15	851.057	3	11
90.36	73.33	Q6QAQ1	ACTB_PIG	Actin, cytoplasmic 1 OS=Sus scrofa GN=ACTB PE=2 SV=2	0	99	LCYVALDFEQEMATAASSSSLEK	Carboxymethyl(C)@2		2549.17	850.73	2550.15	851.057	3	11
90.36	73.33	Q6QAQ1	ACTB_PIG	Actin, cytoplasmic 1 OS=Sus scrofa GN=ACTB PE=2 SV=2	0	99	LCYVALDFEQEMATAASSSSLEK	Carboxymethyl(C)@2		2550.17	851.063	2550.15	851.057	3	8
90.36	73.33	Q6QAQ1	ACTB_PIG	Actin, cytoplasmic 1 OS=Sus scrofa GN=ACTB PE=2 SV=2	0	99	LCYVALDFEQEMATAASSSSLEK	Carboxymethyl(C)@2		2549.17	850.73	2550.15	851.057	3	8
90.36	73.33	Q6QAQ1	ACTB_PIG	Actin, cytoplasmic 1 OS=Sus scrofa GN=ACTB PE=2 SV=2	0	99	LCYVALDFEQEMATAASSSSLEK	Carboxymethyl(C)@2		2550.17	851.063	2550.15	851.057	3	10
90.36	73.33	Q6QAQ1	ACTB_PIG	Actin, cytoplasmic 1 OS=Sus scrofa GN=ACTB PE=2 SV=2	0	98.4	LCYVALDFEQEMATAASSSSLEK	Carboxymethyl(C)@2; Deoxy(D)@7; Deamidated(Q)@10		2535.15	846.057	2535.14	846.054	3	12
90.36	73.33	Q6QAQ1	ACTB_PIG	Actin, cytoplasmic 1 OS=Sus scrofa GN=ACTB PE=2 SV=2	0	97.39	LCYVALDFEQEMATAASSSSLEK	Carboxymethyl(C)@2		2549.17	850.73	2550.15	851.057	3	12
90.36	73.33	Q6QAQ1	ACTB_PIG	Actin, cytoplasmic 1 OS=Sus scrofa GN=ACTB PE=2 SV=2	0	96.62	LCYVALDFEQEMATAASSSSLEK	Carboxymethyl(C)@2		2549.17	850.731	2550.15	851.057	3	14
90.36	73.33	Q6QAQ1	ACTB_PIG	Actin, cytoplasmic 1 OS=Sus scrofa GN=ACTB PE=2 SV=2	0	93.38	LCYVALDFEQEMATAASSSSLEK	Carboxymethyl(C)@2; Deoxy(D)@7; Deamidated(Q)@10		2535.15	846.058	2535.14	846.054	3	11
90.36	73.33	Q6QAQ1	ACTB_PIG	Actin, cytoplasmic 1 OS=Sus scrofa GN=ACTB PE=2 SV=2	0	92.57	LCYVALDFEQEMATAASSSSLEK	Carboxymethyl(C)@2		2549.17	850.73	2550.15	851.057	3	11
90.36	73.33	Q6QAQ1	ACTB_PIG	Actin, cytoplasmic 1 OS=Sus scrofa GN=ACTB PE=2 SV=2	0	92.02	LCYVALDFEQEMATAASSSSLEK	Carboxymethyl(C)@2		2550.17	851.063	2550.15	851.057	3	6
90.36	73.33	Q6QAQ1	ACTB_PIG	Actin, cytoplasmic 1 OS=Sus scrofa GN=ACTB PE=2 SV=2	0	91.58	LCYVALDFEQEMATAASSSSLEK	Carboxymethyl(C)@2; Deoxy(D)@7; Deamidated(Q)@10		2535.15	846.057	2535.14	846.054	3	13
90.36	73.33	Q6QAQ1	ACTB_PIG	Actin, cytoplasmic 1 OS=Sus scrofa GN=ACTB PE=2 SV=2	0	89.94	LCYVALDFEQEMATAASSSSLEK	Carboxymethyl(C)@2; Didehydro(Y)@3; Deamidated(Q)@10		2549.17	850.73	2549.12	850.714	3	11
90.36	73.33	Q6QAQ1	ACTB_PIG	Actin, cytoplasmic 1 OS=Sus scrofa GN=ACTB PE=2 SV=2	0	89.64	LCYVALDFEQEMATAASSSSLEK	Carboxymethyl(C)@2		2549.15	850.724	2550.15	851.057	3	8
90.36	73.33	Q6QAQ1	ACTB_PIG	Actin, cytoplasmic 1 OS=Sus scrofa GN=ACTB PE=2 SV=2	0	88.04	LCYVALDFEQEMATAASSSSLEK	Carboxymethyl(C)@2		2549.17	850.73	2550.15	851.057	3	13
90.36	73.33	Q6QAQ1	ACTB_PIG	Actin, cytoplasmic 1 OS=Sus scrofa GN=ACTB PE=2 SV=2	0	81.28	LCYVALDFEQEMATAASSSSLEK	Carboxymethyl(C)@2; Deoxy(D)@7; Deamidated(Q)@10		2535.15	846.058	2535.14	846.054	3	12
90.36	73.33	Q6QAQ1	ACTB_PIG	Actin, cytoplasmic 1 OS=Sus scrofa GN=ACTB PE=2 SV=2	0	80.87	LCYVALDFEQEMATAASSSSLEK	Acetyl@N-term; Carboxymethyl(C)@2		2592.17	865.065	2592.16	865.061	3	11
90.36	73.33	Q6QAQ1	ACTB_PIG	Actin, cytoplasmic 1 OS=Sus scrofa GN=ACTB PE=2 SV=2	0	80.19	LCYVALDFEQEMATAASSSSLEK	Acetyl@N-term; Carboxymethyl(C)@2		2592.17	649.05	2592.16	649.048	4	11
90.36	73.33	Q6QAQ1	ACTB_PIG	Actin, cytoplasmic 1 OS=Sus scrofa GN=ACTB PE=2 SV=2	0	80.19	LCYVALDFEQEMATAASSSSLEK	Acetyl@N-term; Carboxymethyl(C)@2		2592.17	865.065	2592.16	865.061	3	11
90.36	73.33	Q6QAQ1	ACTB_PIG	Actin, cytoplasmic 1 OS=Sus scrofa GN=ACTB PE=2 SV=2	0	74.08	LCYVALDFEQEMATAASSSSLEK	Carboxymethyl(C)@2		2549.17	850.731	2550.15	851.057	3	12
90.36	73.33	Q6QAQ1	ACTB_PIG	Actin, cytoplasmic 1 OS=Sus scrofa GN=ACTB PE=2 SV=2	0	72.47	LCYVALDFEQEMATAASSSSLEK	Carboxymethyl(C)@2; Deoxy(D)@7; Deamidated(Q)@10		2535.15	846.057	2535.14	846.054	3	13
90.36	73.33	Q6QAQ1	ACTB_PIG	Actin, cytoplasmic 1 OS=Sus scrofa GN=ACTB PE=2 SV=2	0	72.47	LCYVALDFEQEMATAASSSSLEK	Carboxymethyl(C)@2		2549.17	850.731	2550.15	851.057	3	10
90.36	73.33	Q6QAQ1	ACTB_PIG	Actin, cytoplasmic 1 OS=Sus scrofa GN=ACTB PE=2 SV=2	0	72.09	LCYVALDFEQEMATAASSSSLEK	Carboxymethyl(C)@2; Deoxy(D)@7; Deamidated(Q)@10		2535.15	846.057	2535.14	846.054	3	10
90.36	73.33	Q6QAQ1	ACTB_PIG	Actin, cytoplasmic 1 OS=Sus scrofa GN=ACTB PE=2 SV=2	0	71.44	LCYVALDFEQEMATAASSSSLEK	Carboxymethyl(C)@2; Deoxy(D)@7; Deamidated(Q)@10		2535.15	846.057	2535.14	846.054	3	10
90.36	73.33	Q6QAQ1	ACTB_PIG	Actin, cytoplasmic 1 OS=Sus scrofa GN=ACTB PE=2 SV=2	0	71.44	LCYVALDFEQEMATAASSSSLEK	Carboxymethyl(C)@2; Deoxy(D)@7; Deamidated(Q)@10		2535.15	846.057	2535.14	846.054	3	9
90.36	73.33	Q6QAQ1	ACTB_PIG	Actin, cytoplasmic 1 OS=Sus scrofa GN=ACTB PE=2 SV=2	0	67.73	LCYVALDFEQEMATAASSSSLEK	Carboxymethyl(C)@2; Deoxy(D)@7; Deamidated(Q)@10		2535.15	846.058	2535.14	846.054	3	9
90.36	73.33	Q6QAQ1	ACTB_PIG	Actin, cytoplasmic 1 OS=Sus scrofa GN=ACTB PE=2 SV=2	0	60.73	LCYVALDFEQEMATAASSSSLEK	Acetyl@N-term; Carboxymethyl(C)@2		2592.17	865.064	2592.16	865.061	3	8
90.36	73.33	Q6QAQ1	ACTB_PIG	Actin, cytoplasmic 1 OS=Sus scrofa GN=ACTB PE=2 SV=2	0	59.14	LCYVALDFEQEMATAASSSSLEK	Carboxymethyl(C)@2; Deoxy(D)@7; Deamidated(Q)@10		2535.15	846.057	2535.14	846.054	3	10
90.36	73.33	Q6QAQ1	ACTB_PIG	Actin, cytoplasmic 1 OS=Sus scrofa GN=ACTB PE=2 SV=2	0	56.94	LCYVALDFEQEMATAASSSSLEK	Acetyl@N-term; Carboxymethyl(C)@2		2592.17	865.064	2592.16	865.061	3	10
90.36	73.33	Q6QAQ1	ACTB_PIG	Actin, cytoplasmic 1 OS=Sus scrofa GN=ACTB PE=2 SV=2	0	56.72	LCYVALDFEQEMATAASSSSLEK	Acetyl@N-term; Carboxymethyl(C)@2		2592.17	865.064	2592.16	865.061	3	10
90.36	73.33	Q6QAQ1	ACTB_PIG	Actin, cytoplasmic 1 OS=Sus scrofa GN=ACTB PE=2 SV=2	0	55.92	LCYVALDFEQEMATAASSSSLEK	Acetyl@N-term; Carboxymethyl(C)@2		2592.17	865.065	2592.16	865.061	3	10
90.36	73.33	Q6QAQ1	ACTB_PIG	Actin, cytoplasmic 1 OS=Sus scrofa GN=ACTB PE=2 SV=2	0	39.94	LCYVALDFEQEMATAASSSSLEK	Acetyl@N-term; Carboxymethyl(C)@2		2592.17	865.064	2592.16	865.061	3	9
90.36	73.33	Q6QAQ1	ACTB_PIG	Actin, cytoplasmic 1 OS=Sus scrofa GN=ACTB PE=2 SV=2	0	39.61	LCYVALDFEQEMATAASSSSLEK	Acetyl@N-term; Carboxymethyl(C)@2		2592.17	865.064	2592.16	865.061	3	9
90.36	73.33	Q6QAQ1	ACTB_PIG	Actin, cytoplasmic 1 OS=Sus scrofa GN=ACTB PE=2 SV=2	0	27.38	LCYVALDFEQEMATAASSSSLEK	Acetyl@N-term; Carboxymethyl(C)@2		2592.17	865.064	2592.16	865.061	3	10
90.36	73.33	Q6QAQ1	ACTB_PIG	Actin, cytoplasmic 1 OS=Sus scrofa GN=ACTB PE=2 SV=2	0	26.25	LCYVALDFEQEMATAASSSSLEK	Acetyl@N-term; Carboxymethyl(C)@2		2592.17	649.05	2592.16	649.048	4	9
90.36	73.33	Q6QAQ1	ACTB_PIG	Actin, cytoplasmic 1 OS=Sus scrofa GN=ACTB PE=2 SV=2	0	25.92	LCYVALDFEQEMATAASSSSLEK	Acetyl@N-term; Carboxymethyl(C)@2		2592.17	865.065	2592.16	865.061	3	9
90.36	73.33	Q6QAQ1	ACTB_PIG	Actin, cytoplasmic 1 OS=Sus scrofa GN=ACTB PE=2 SV=2	0	25.9	LCYVALDFEQEMATAASSSSLEK	Acetyl@N-term; Carboxymethyl(C)@2		2592.17	865.065	2592.16	865.061	3	9
90.36	73.33	Q6QAQ1	ACTB_PIG	Actin, cytoplasmic 1 OS=Sus scrofa GN=ACTB PE=2 SV=2	0	19.54	LCYVALDFEQEMATAASSSSLEK	Acetyl@N-term; Carboxymethyl(C)@2		2592.18	649.052	2592.16	649.048	4	7
90.36	73.33	Q6QAQ1	ACTB_PIG	Actin, cytoplasmic 1 OS=Sus scrofa GN=ACTB PE=2 SV=2	0	95.32	LEKSYELPDGQVITIGNER		cleaved S-L@N-term; missed K-S@3	2166.09	1084.05	2160.11	1081.06	2	13
90.36	73.33	Q6QAQ1	ACTB_PIG	Actin, cytoplasmic 1 OS=Sus scrofa GN=ACTB PE=2 SV=2	0	99	LLTEAPLNPK		cleaved V-L@N-term	1094.63	548.324	1094.63	548.324	2	12
90.36	73.33	Q6QAQ1	ACTB_PIG	Actin, cytoplasmic 1 OS=Sus scrofa GN=ACTB PE=2 SV=2	0	68.28	LLTEAPLNPK		cleaved V-L@N-term	1094.64	548.327	1094.63	548.324	2	9
90.36	73.33	Q6QAQ1	ACTB_PIG	Actin, cytoplasmic 1 OS=Sus scrofa GN=ACTB PE=2 SV=2	0	68.08	LLTEAPLNPK		cleaved V-L@N-term	1094.63	548.324	1094.63	548.324	2	10
90.36	73.33	Q6QAQ1	ACTB_PIG	Actin, cytoplasmic 1 OS=Sus scrofa GN=ACTB PE=2 SV=2	0	27.66	LLTEAPLNPK		cleaved V-L@N-term	1094.63	548.324	1094.63	548.324	2	7
90.36	73.33	Q6QAQ1	ACTB_PIG	Actin, cytoplasmic 1 OS=Sus scrofa GN=ACTB PE=2 SV=2	0	99	LPDGQVITIGNER		cleaved E-L@N-term	1410.75	706.38	1410.75	706.381	2	14
90.36	73.33	Q6QAQ1	ACTB_PIG	Actin, cytoplasmic 1 OS=Sus scrofa GN=ACTB PE=2 SV=2	0	99	LPDGQVITIGNER		cleaved E-L@N-term	1410.74	706.38	1410.75	706.381	2	15
90.36	73.33	Q6QAQ1	ACTB_PIG	Actin, cytoplasmic 1 OS=Sus scrofa GN=ACTB PE=2 SV=2	0	92.63	LPDGQVITIGNER		cleaved E-L@N-term	1410.74	706.38	1410.75	706.381	2	9
90.36	73.33	Q6QAQ1	ACTB_PIG	Actin, cytoplasmic 1 OS=Sus scrofa GN=ACTB PE=2 SV=2	0	75.29	LPDGQVITIGNER		cleaved E-L@N-term	1410.74	706.379	1410.75	706.381	2	8
90.36	73.33	Q6QAQ1	ACTB_PIG	Actin, cytoplasmic 1 OS=Sus scrofa GN=ACTB PE=2 SV=2	0	27.51	LPDGQVITIGNER		cleaved E-L@N-term	1410.75	706.381	1410.75	706.381	2	7
90.36	73.33	Q6QAQ1	ACTB_PIG	Actin, cytoplasmic 1 OS=Sus scrofa GN=ACTB PE=2 SV=2	0	72.49	MDDDIAALVVDNGSGMCK	Oxidation(M)@1; Dethiomethyl(M)@16; Carboxymethyl(C)@17; Amidated@C-term		1877.81	939.912	1877.81	939.914	2	13
90.36	73.33	Q6QAQ1	ACTB_PIG	Actin, cytoplasmic 1 OS=Sus scrofa GN=ACTB PE=2 SV=2	0	34.01	MDDDIAALVVDNGSGMCK	Oxidation(M)@1; Dethiomethyl(M)@16; Carboxymethyl(C)@17		1878.79	940.404	1878.8	940.406	2	7
90.36	73.33	Q6QAQ1	ACTB_PIG	Actin, cytoplasmic 1 OS=Sus scrofa GN=ACTB PE=2 SV=2	0	24.27	MDDDIAALVVDNGSGMCK	Oxidation(M)@1; Dethiomethyl(M)@16; Carboxymethyl(C)@17		1878.79	940.405	1878.8	940.406	2	7
90.36	73.33	Q6QAQ1	ACTB_PIG	Actin, cytoplasmic 1 OS=Sus scrofa GN=ACTB PE=2 SV=2	0	99	MTQIMFETFNTPAMYVAIQAVLSLYASGR	Met->Hcy(M)@14; Iodo(Y)@15		3364.69	842.178	3364.48	842.128	4	10
90.36	73.33	Q6QAQ1	ACTB_PIG	Actin, cytoplasmic 1 OS=Sus scrofa GN=ACTB PE=2 SV=2	0	47.2	NSIMKCDVDIRKDLYANTVLSGGTTMYPGIADR	Carboxymethyl(C)@6	cleaved F-N@N-term; missed K-C@5; missed R-K@11; missed K-D@12	3671.77	918.951	3674.77	919.701	4	10
90.36	73.33	Q6QAQ1	ACTB_PIG	Actin, cytoplasmic 1 OS=Sus scrofa GN=ACTB PE=2 SV=2	0	40.33	NSIMKCDVDIRKDLYANTVLSGGTTMYPGIADR	Carboxymethyl(C)@6	cleaved F-N@N-term; missed K-C@5; missed R-K@11; missed K-D@12	3671.77	918.95	3674.77	919.701	4	12
90.36	73.33	Q6QAQ1	ACTB_PIG	Actin, cytoplasmic 1 OS=Sus scrofa GN=ACTB PE=2 SV=2	0	99	PIEHGIVTNWDDMEK	Methyl(H)@4	cleaved Y-P@N-term	1796.84	899.428	1796.84	899.427	2	15
90.36	73.33	Q6QAQ1	ACTB_PIG	Actin, cytoplasmic 1 OS=Sus scrofa GN=ACTB PE=2 SV=2	0	97.33	PIEHGIVTNWDDMEK	Methyl(H)@4	cleaved Y-P@N-term	1796.84	899.428	1796.84	899.427	2	12
90.36	73.33	Q6QAQ1	ACTB_PIG	Actin, cytoplasmic 1 OS=Sus scrofa GN=ACTB PE=2 SV=2	0	91.39	PIEHGIVTNWDDMEK	Methyl(H)@4	cleaved Y-P@N-term	1796.84	899.428	1796.84	899.427	2	12
90.36	73.33	Q6QAQ1	ACTB_PIG	Actin, cytoplasmic 1 OS=Sus scrofa GN=ACTB PE=2 SV=2	0	24.85	PIEHGIVTNWDDMEK	Delta:H(4)C(2)(H)@4	cleaved Y-P@N-term	1810.86	604.627	1810.86	604.626	3	12
90.36	73.33	Q6QAQ1	ACTB_PIG	Actin, cytoplasmic 1 OS=Sus scrofa GN=ACTB PE=2 SV=2	0	57.52	PSIVGRPR		cleaved F-P@N-term	880.522	441.268	880.524	441.269	2	6
90.36	73.33	Q6QAQ1	ACTB_PIG	Actin, cytoplasmic 1 OS=Sus scrofa GN=ACTB PE=2 SV=2	0	99	QEYDESGPSIVH		cleaved H-R@C-term	1359.59	680.805	1359.59	680.804	2	11
90.36	73.33	Q6QAQ1	ACTB_PIG	Actin, cytoplasmic 1 OS=Sus scrofa GN=ACTB PE=2 SV=2	0	99	QEYDESGPSIVH		cleaved H-R@C-term	1359.6	680.805	1359.59	680.804	2	11
90.36	73.33	Q6QAQ1	ACTB_PIG	Actin, cytoplasmic 1 OS=Sus scrofa GN=ACTB PE=2 SV=2	0	89.36	QEYDESGPSIVH		cleaved H-R@C-term	1359.6	680.805	1359.59	680.804	2	8
90.36	73.33	Q6QAQ1	ACTB_PIG	Actin, cytoplasmic 1 OS=Sus scrofa GN=ACTB PE=2 SV=2	0	84.97	QEYDESGPSIVH		cleaved H-R@C-term	1359.6	680.805	1359.59	680.804	2	11
90.36	73.33	Q6QAQ1	ACTB_PIG	Actin, cytoplasmic 1 OS=Sus scrofa GN=ACTB PE=2 SV=2	0	84.77	QEYDESGPSIVH		cleaved H-R@C-term	1359.59	680.805	1359.59	680.804	2	8
90.36	73.33	Q6QAQ1	ACTB_PIG	Actin, cytoplasmic 1 OS=Sus scrofa GN=ACTB PE=2 SV=2	0	79.54	QEYDESGPSIVH		cleaved H-R@C-term	1359.6	680.805	1359.59	680.804	2	11
90.36	73.33	Q6QAQ1	ACTB_PIG	Actin, cytoplasmic 1 OS=Sus scrofa GN=ACTB PE=2 SV=2	0	62.46	QEYDESGPSIVH		cleaved H-R@C-term	1359.6	680.805	1359.59	680.804	2	10
90.36	73.33	Q6QAQ1	ACTB_PIG	Actin, cytoplasmic 1 OS=Sus scrofa GN=ACTB PE=2 SV=2	0	60.4	QEYDESGPSIVH		cleaved H-R@C-term	1359.59	680.804	1359.59	680.804	2	7
90.36	73.33	Q6QAQ1	ACTB_PIG	Actin, cytoplasmic 1 OS=Sus scrofa GN=ACTB PE=2 SV=2	0	29.92	QEYDESGPSIVH		cleaved H-R@C-term	1359.59	680.804	1359.59	680.804	2	6
90.36	73.33	Q6QAQ1	ACTB_PIG	Actin, cytoplasmic 1 OS=Sus scrofa GN=ACTB PE=2 SV=2	0	99	QEYDESGPSIVHR			1515.7	506.24	1515.7	506.239	3	19
90.36	73.33	Q6QAQ1	ACTB_PIG	Actin, cytoplasmic 1 OS=Sus scrofa GN=ACTB PE=2 SV=2	0	99	QEYDESGPSIVHR			1515.7	506.24	1515.7	506.239	3	18
90.36	73.33	Q6QAQ1	ACTB_PIG	Actin, cytoplasmic 1 OS=Sus scrofa GN=ACTB PE=2 SV=2	0	99	QEYDESGPSIVHR			1515.7	506.24	1515.7	506.239	3	11
90.36	73.33	Q6QAQ1	ACTB_PIG	Actin, cytoplasmic 1 OS=Sus scrofa GN=ACTB PE=2 SV=2	0	99	QEYDESGPSIVHR	Gln->pyro-Glu@N-term		1498.67	750.341	1498.67	750.342	2	16
90.36	73.33	Q6QAQ1	ACTB_PIG	Actin, cytoplasmic 1 OS=Sus scrofa GN=ACTB PE=2 SV=2	0	99	QEYDESGPSIVHR	Gln->pyro-Glu@N-term		1498.67	750.341	1498.67	750.342	2	14
90.36	73.33	Q6QAQ1	ACTB_PIG	Actin, cytoplasmic 1 OS=Sus scrofa GN=ACTB PE=2 SV=2	0	99	QEYDESGPSIVHR	Gln->pyro-Glu@N-term		1498.67	750.341	1498.67	750.342	2	9
90.36	73.33	Q6QAQ1	ACTB_PIG	Actin, cytoplasmic 1 OS=Sus scrofa GN=ACTB PE=2 SV=2	0	99	QEYDESGPSIVHR			1515.7	506.24	1515.7	506.239	3	19
90.36	73.33	Q6QAQ1	ACTB_PIG	Actin, cytoplasmic 1 OS=Sus scrofa GN=ACTB PE=2 SV=2	0	99	QEYDESGPSIVHR	Gln->pyro-Glu@N-term		1498.67	750.342	1498.67	750.342	2	17
90.36	73.33	Q6QAQ1	ACTB_PIG	Actin, cytoplasmic 1 OS=Sus scrofa GN=ACTB PE=2 SV=2	0	99	QEYDESGPSIVHR			1515.7	758.856	1515.7	758.855	2	15
90.36	73.33	Q6QAQ1	ACTB_PIG	Actin, cytoplasmic 1 OS=Sus scrofa GN=ACTB PE=2 SV=2	0	99	QEYDESGPSIVHR			1515.7	506.24	1515.7	506.239	3	18
90.36	73.33	Q6QAQ1	ACTB_PIG	Actin, cytoplasmic 1 OS=Sus scrofa GN=ACTB PE=2 SV=2	0	99	QEYDESGPSIVHR			1515.7	506.24	1515.7	506.239	3	17
90.36	73.33	Q6QAQ1	ACTB_PIG	Actin, cytoplasmic 1 OS=Sus scrofa GN=ACTB PE=2 SV=2	0	99	QEYDESGPSIVHR	Gln->pyro-Glu@N-term		1498.67	750.341	1498.67	750.342	2	17
90.36	73.33	Q6QAQ1	ACTB_PIG	Actin, cytoplasmic 1 OS=Sus scrofa GN=ACTB PE=2 SV=2	0	99	QEYDESGPSIVHR	Gln->pyro-Glu@N-term		1498.67	750.342	1498.67	750.342	2	14
90.36	73.33	Q6QAQ1	ACTB_PIG	Actin, cytoplasmic 1 OS=Sus scrofa GN=ACTB PE=2 SV=2	0	99	QEYDESGPSIVHR			1515.7	758.856	1515.7	758.855	2	16
90.36	73.33	Q6QAQ1	ACTB_PIG	Actin, cytoplasmic 1 OS=Sus scrofa GN=ACTB PE=2 SV=2	0	99	QEYDESGPSIVHR			1515.7	758.856	1515.7	758.855	2	15
90.36	73.33	Q6QAQ1	ACTB_PIG	Actin, cytoplasmic 1 OS=Sus scrofa GN=ACTB PE=2 SV=2	0	99	QEYDESGPSIVHR			1515.7	506.24	1515.7	506.239	3	13
90.36	73.33	Q6QAQ1	ACTB_PIG	Actin, cytoplasmic 1 OS=Sus scrofa GN=ACTB PE=2 SV=2	0	99	QEYDESGPSIVHR			1515.7	506.24	1515.7	506.239	3	16
90.36	73.33	Q6QAQ1	ACTB_PIG	Actin, cytoplasmic 1 OS=Sus scrofa GN=ACTB PE=2 SV=2	0	99	QEYDESGPSIVHR			1515.7	758.856	1515.7	758.855	2	16
90.36	73.33	Q6QAQ1	ACTB_PIG	Actin, cytoplasmic 1 OS=Sus scrofa GN=ACTB PE=2 SV=2	0	99	QEYDESGPSIVHR	Gln->pyro-Glu@N-term		1498.67	750.341	1498.67	750.342	2	16
90.36	73.33	Q6QAQ1	ACTB_PIG	Actin, cytoplasmic 1 OS=Sus scrofa GN=ACTB PE=2 SV=2	0	99	QEYDESGPSIVHR	Gln->pyro-Glu@N-term		1498.67	750.341	1498.67	750.342	2	17
90.36	73.33	Q6QAQ1	ACTB_PIG	Actin, cytoplasmic 1 OS=Sus scrofa GN=ACTB PE=2 SV=2	0	99	QEYDESGPSIVHR			1515.7	506.239	1515.7	506.239	3	16
90.36	73.33	Q6QAQ1	ACTB_PIG	Actin, cytoplasmic 1 OS=Sus scrofa GN=ACTB PE=2 SV=2	0	99	QEYDESGPSIVHR			1515.7	758.855	1515.7	758.855	2	16
90.36	73.33	Q6QAQ1	ACTB_PIG	Actin, cytoplasmic 1 OS=Sus scrofa GN=ACTB PE=2 SV=2	0	99	QEYDESGPSIVHR			1515.7	758.856	1515.7	758.855	2	15
90.36	73.33	Q6QAQ1	ACTB_PIG	Actin, cytoplasmic 1 OS=Sus scrofa GN=ACTB PE=2 SV=2	0	99	QEYDESGPSIVHR			1515.7	758.855	1515.7	758.855	2	12
90.36	73.33	Q6QAQ1	ACTB_PIG	Actin, cytoplasmic 1 OS=Sus scrofa GN=ACTB PE=2 SV=2	0	99	QEYDESGPSIVHR			1515.7	758.856	1515.7	758.855	2	14
90.36	73.33	Q6QAQ1	ACTB_PIG	Actin, cytoplasmic 1 OS=Sus scrofa GN=ACTB PE=2 SV=2	0	99	QEYDESGPSIVHR	Gln->pyro-Glu@N-term		1498.67	750.342	1498.67	750.342	2	11
90.36	73.33	Q6QAQ1	ACTB_PIG	Actin, cytoplasmic 1 OS=Sus scrofa GN=ACTB PE=2 SV=2	0	99	QEYDESGPSIVHR			1515.7	758.855	1515.7	758.855	2	15
90.36	73.33	Q6QAQ1	ACTB_PIG	Actin, cytoplasmic 1 OS=Sus scrofa GN=ACTB PE=2 SV=2	0	99	QEYDESGPSIVHR			1515.7	758.855	1515.7	758.855	2	17
90.36	73.33	Q6QAQ1	ACTB_PIG	Actin, cytoplasmic 1 OS=Sus scrofa GN=ACTB PE=2 SV=2	0	99	QEYDESGPSIVHR			1515.7	506.24	1515.7	506.239	3	16
90.36	73.33	Q6QAQ1	ACTB_PIG	Actin, cytoplasmic 1 OS=Sus scrofa GN=ACTB PE=2 SV=2	0	99	QEYDESGPSIVHR			1515.7	758.855	1515.7	758.855	2	11
90.36	73.33	Q6QAQ1	ACTB_PIG	Actin, cytoplasmic 1 OS=Sus scrofa GN=ACTB PE=2 SV=2	0	99	QEYDESGPSIVHR	Gln->pyro-Glu@N-term		1498.67	750.343	1498.67	750.342	2	16
90.36	73.33	Q6QAQ1	ACTB_PIG	Actin, cytoplasmic 1 OS=Sus scrofa GN=ACTB PE=2 SV=2	0	99	QEYDESGPSIVHR			1515.7	506.24	1515.7	506.239	3	13
90.36	73.33	Q6QAQ1	ACTB_PIG	Actin, cytoplasmic 1 OS=Sus scrofa GN=ACTB PE=2 SV=2	0	99	QEYDESGPSIVHR			1515.7	506.24	1515.7	506.239	3	14
90.36	73.33	Q6QAQ1	ACTB_PIG	Actin, cytoplasmic 1 OS=Sus scrofa GN=ACTB PE=2 SV=2	0	99	QEYDESGPSIVHR			1515.7	758.855	1515.7	758.855	2	10
90.36	73.33	Q6QAQ1	ACTB_PIG	Actin, cytoplasmic 1 OS=Sus scrofa GN=ACTB PE=2 SV=2	0	99	QEYDESGPSIVHR			1515.7	758.855	1515.7	758.855	2	13
90.36	73.33	Q6QAQ1	ACTB_PIG	Actin, cytoplasmic 1 OS=Sus scrofa GN=ACTB PE=2 SV=2	0	99	QEYDESGPSIVHR			1515.71	506.243	1515.7	506.239	3	10
90.36	73.33	Q6QAQ1	ACTB_PIG	Actin, cytoplasmic 1 OS=Sus scrofa GN=ACTB PE=2 SV=2	0	99	QEYDESGPSIVHR			1515.7	506.24	1515.7	506.239	3	11
90.36	73.33	Q6QAQ1	ACTB_PIG	Actin, cytoplasmic 1 OS=Sus scrofa GN=ACTB PE=2 SV=2	0	98.98	QEYDESGPSIVHR	Gln->pyro-Glu@N-term		1498.67	750.341	1498.67	750.342	2	13
90.36	73.33	Q6QAQ1	ACTB_PIG	Actin, cytoplasmic 1 OS=Sus scrofa GN=ACTB PE=2 SV=2	0	98.6	QEYDESGPSIVHR			1515.7	758.856	1515.7	758.855	2	9
90.36	73.33	Q6QAQ1	ACTB_PIG	Actin, cytoplasmic 1 OS=Sus scrofa GN=ACTB PE=2 SV=2	0	97.65	QEYDESGPSIVHR	Methyl(H)@12; Carbamyl(R)@13		1572.72	787.365	1572.72	787.366	2	10
90.36	73.33	Q6QAQ1	ACTB_PIG	Actin, cytoplasmic 1 OS=Sus scrofa GN=ACTB PE=2 SV=2	0	97.64	QEYDESGPSIVHR			1515.7	506.239	1515.7	506.239	3	12
90.36	73.33	Q6QAQ1	ACTB_PIG	Actin, cytoplasmic 1 OS=Sus scrofa GN=ACTB PE=2 SV=2	0	97.54	QEYDESGPSIVHR			1515.7	506.24	1515.7	506.239	3	12
90.36	73.33	Q6QAQ1	ACTB_PIG	Actin, cytoplasmic 1 OS=Sus scrofa GN=ACTB PE=2 SV=2	0	97.12	QEYDESGPSIVHR			1515.7	506.239	1515.7	506.239	3	11
90.36	73.33	Q6QAQ1	ACTB_PIG	Actin, cytoplasmic 1 OS=Sus scrofa GN=ACTB PE=2 SV=2	0	95.72	QEYDESGPSIVHR			1515.7	506.239	1515.7	506.239	3	11
90.36	73.33	Q6QAQ1	ACTB_PIG	Actin, cytoplasmic 1 OS=Sus scrofa GN=ACTB PE=2 SV=2	0	90.35	QEYDESGPSIVHR			1515.7	506.24	1515.7	506.239	3	10
90.36	73.33	Q6QAQ1	ACTB_PIG	Actin, cytoplasmic 1 OS=Sus scrofa GN=ACTB PE=2 SV=2	0	89.98	QEYDESGPSIVHR			1515.7	506.242	1515.7	506.239	3	7
90.36	73.33	Q6QAQ1	ACTB_PIG	Actin, cytoplasmic 1 OS=Sus scrofa GN=ACTB PE=2 SV=2	0	88.64	QEYDESGPSIVHR	Carbamyl@N-term; Methyl(E)@2		1572.72	525.246	1572.72	525.246	3	14
90.36	73.33	Q6QAQ1	ACTB_PIG	Actin, cytoplasmic 1 OS=Sus scrofa GN=ACTB PE=2 SV=2	0	85.59	QEYDESGPSIVHR	Methyl(H)@12; Carbamyl(R)@13		1572.72	787.366	1572.72	787.366	2	11
90.36	73.33	Q6QAQ1	ACTB_PIG	Actin, cytoplasmic 1 OS=Sus scrofa GN=ACTB PE=2 SV=2	0	84.13	QEYDESGPSIVHR	Ser->LacticAcid(S)@6		1500.7	501.242	1500.68	501.235	3	14
90.36	73.33	Q6QAQ1	ACTB_PIG	Actin, cytoplasmic 1 OS=Sus scrofa GN=ACTB PE=2 SV=2	0	58.34	QEYDESGPSIVHR			1515.7	506.24	1515.7	506.239	3	10
90.36	73.33	Q6QAQ1	ACTB_PIG	Actin, cytoplasmic 1 OS=Sus scrofa GN=ACTB PE=2 SV=2	0	41.89	QEYDESGPSIVHR	Deamidated(Q)@1		1516.75	506.59	1516.68	506.567	3	8
90.36	73.33	Q6QAQ1	ACTB_PIG	Actin, cytoplasmic 1 OS=Sus scrofa GN=ACTB PE=2 SV=2	0	28.07	QEYDESGPSIVHR	Ser->LacticAcid(S)@6		1500.7	501.242	1500.68	501.235	3	11
90.36	73.33	Q6QAQ1	ACTB_PIG	Actin, cytoplasmic 1 OS=Sus scrofa GN=ACTB PE=2 SV=2	0	27.7	QEYDESGPSIVHR			1515.7	758.856	1515.7	758.855	2	7
90.36	73.33	Q6QAQ1	ACTB_PIG	Actin, cytoplasmic 1 OS=Sus scrofa GN=ACTB PE=2 SV=2	0	26.49	QEYDESGPSIVHR			1515.7	506.241	1515.7	506.239	3	6
90.36	73.33	Q6QAQ1	ACTB_PIG	Actin, cytoplasmic 1 OS=Sus scrofa GN=ACTB PE=2 SV=2	0	26.13	QEYDESGPSIVHR			1515.7	758.855	1515.7	758.855	2	6
90.36	73.33	Q6QAQ1	ACTB_PIG	Actin, cytoplasmic 1 OS=Sus scrofa GN=ACTB PE=2 SV=2	0	18.54	QEYDESGPSIVHR	Dehydrated(D)@4		1497.69	500.236	1497.68	500.236	3	6
90.36	73.33	Q6QAQ1	ACTB_PIG	Actin, cytoplasmic 1 OS=Sus scrofa GN=ACTB PE=2 SV=2	0	35.53	RGILTLK		missed R-G@1	799.482	400.748	799.528	400.771	2	7
90.36	73.33	Q6QAQ1	ACTB_PIG	Actin, cytoplasmic 1 OS=Sus scrofa GN=ACTB PE=2 SV=2	0	99	RVAPEEHPVLLTEAPLNPK		cleaved L-R@N-term; missed R-V@1	2109.16	704.06	2109.16	704.06	3	19
90.36	73.33	Q6QAQ1	ACTB_PIG	Actin, cytoplasmic 1 OS=Sus scrofa GN=ACTB PE=2 SV=2	0	99	RVAPEEHPVLLTEAPLNPK		cleaved L-R@N-term; missed R-V@1	2109.16	528.298	2109.16	528.297	4	16
90.36	73.33	Q6QAQ1	ACTB_PIG	Actin, cytoplasmic 1 OS=Sus scrofa GN=ACTB PE=2 SV=2	0	99	RVAPEEHPVLLTEAPLNPK		cleaved L-R@N-term; missed R-V@1	2109.16	704.061	2109.16	704.06	3	13
90.36	73.33	Q6QAQ1	ACTB_PIG	Actin, cytoplasmic 1 OS=Sus scrofa GN=ACTB PE=2 SV=2	0	99	RVAPEEHPVLLTEAPLNPK		cleaved L-R@N-term; missed R-V@1	2109.16	528.297	2109.16	528.297	4	11
90.36	73.33	Q6QAQ1	ACTB_PIG	Actin, cytoplasmic 1 OS=Sus scrofa GN=ACTB PE=2 SV=2	0	85.01	SGGTTMYPGIADR		cleaved L-S@N-term	1324.61	663.315	1324.61	663.311	2	7
90.36	73.33	Q6QAQ1	ACTB_PIG	Actin, cytoplasmic 1 OS=Sus scrofa GN=ACTB PE=2 SV=2	0	46.54	SGGTTMYPGIADR		cleaved L-S@N-term	1324.61	663.31	1324.61	663.311	2	6
90.36	73.33	Q6QAQ1	ACTB_PIG	Actin, cytoplasmic 1 OS=Sus scrofa GN=ACTB PE=2 SV=2	0	89.18	SYELPDGQVITI		cleaved I-G@C-term	1333.68	667.846	1333.68	667.846	2	7
90.36	73.33	Q6QAQ1	ACTB_PIG	Actin, cytoplasmic 1 OS=Sus scrofa GN=ACTB PE=2 SV=2	0	44.94	SYELPDGQVITIGNE		cleaved E-R@C-term	1633.78	817.899	1633.78	817.899	2	9
90.36	73.33	Q6QAQ1	ACTB_PIG	Actin, cytoplasmic 1 OS=Sus scrofa GN=ACTB PE=2 SV=2	0	99	SYELPDGQVITIGNER			1789.88	895.949	1789.88	895.95	2	16
90.36	73.33	Q6QAQ1	ACTB_PIG	Actin, cytoplasmic 1 OS=Sus scrofa GN=ACTB PE=2 SV=2	0	99	SYELPDGQVITIGNER			1789.88	895.949	1789.88	895.95	2	15
90.36	73.33	Q6QAQ1	ACTB_PIG	Actin, cytoplasmic 1 OS=Sus scrofa GN=ACTB PE=2 SV=2	0	99	SYELPDGQVITIGNER	Dehydrated(D)@6		1771.87	886.943	1771.87	886.944	2	17
90.36	73.33	Q6QAQ1	ACTB_PIG	Actin, cytoplasmic 1 OS=Sus scrofa GN=ACTB PE=2 SV=2	0	99	SYELPDGQVITIGNER			1789.88	597.635	1789.88	597.635	3	20
90.36	73.33	Q6QAQ1	ACTB_PIG	Actin, cytoplasmic 1 OS=Sus scrofa GN=ACTB PE=2 SV=2	0	99	SYELPDGQVITIGNER			1789.88	895.949	1789.88	895.95	2	24
90.36	73.33	Q6QAQ1	ACTB_PIG	Actin, cytoplasmic 1 OS=Sus scrofa GN=ACTB PE=2 SV=2	0	99	SYELPDGQVITIGNER			1789.88	895.949	1789.88	895.95	2	24
90.36	73.33	Q6QAQ1	ACTB_PIG	Actin, cytoplasmic 1 OS=Sus scrofa GN=ACTB PE=2 SV=2	0	99	SYELPDGQVITIGNER			1789.88	895.949	1789.88	895.95	2	17
90.36	73.33	Q6QAQ1	ACTB_PIG	Actin, cytoplasmic 1 OS=Sus scrofa GN=ACTB PE=2 SV=2	0	99	SYELPDGQVITIGNER			1789.88	895.949	1789.88	895.95	2	15
90.36	73.33	Q6QAQ1	ACTB_PIG	Actin, cytoplasmic 1 OS=Sus scrofa GN=ACTB PE=2 SV=2	0	99	SYELPDGQVITIGNER			1789.88	895.949	1789.88	895.95	2	16
90.36	73.33	Q6QAQ1	ACTB_PIG	Actin, cytoplasmic 1 OS=Sus scrofa GN=ACTB PE=2 SV=2	0	99	SYELPDGQVITIGNER			1789.88	895.949	1789.88	895.95	2	17
90.36	73.33	Q6QAQ1	ACTB_PIG	Actin, cytoplasmic 1 OS=Sus scrofa GN=ACTB PE=2 SV=2	0	99	SYELPDGQVITIGNER			1789.9	895.957	1789.88	895.95	2	10
90.36	73.33	Q6QAQ1	ACTB_PIG	Actin, cytoplasmic 1 OS=Sus scrofa GN=ACTB PE=2 SV=2	0	99	SYELPDGQVITIGNER			1789.89	895.952	1789.88	895.95	2	9
90.36	73.33	Q6QAQ1	ACTB_PIG	Actin, cytoplasmic 1 OS=Sus scrofa GN=ACTB PE=2 SV=2	0	99	SYELPDGQVITIGNER			1789.89	895.952	1789.88	895.95	2	9
90.36	73.33	Q6QAQ1	ACTB_PIG	Actin, cytoplasmic 1 OS=Sus scrofa GN=ACTB PE=2 SV=2	0	99	SYELPDGQVITIGNER			1789.89	895.953	1789.88	895.95	2	9
90.36	73.33	Q6QAQ1	ACTB_PIG	Actin, cytoplasmic 1 OS=Sus scrofa GN=ACTB PE=2 SV=2	0	99	SYELPDGQVITIGNER			1789.89	895.951	1789.88	895.95	2	15
90.36	73.33	Q6QAQ1	ACTB_PIG	Actin, cytoplasmic 1 OS=Sus scrofa GN=ACTB PE=2 SV=2	0	99	SYELPDGQVITIGNER			1789.89	597.636	1789.88	597.635	3	16
90.36	73.33	Q6QAQ1	ACTB_PIG	Actin, cytoplasmic 1 OS=Sus scrofa GN=ACTB PE=2 SV=2	0	99	SYELPDGQVITIGNER			1789.89	895.951	1789.88	895.95	2	18
90.36	73.33	Q6QAQ1	ACTB_PIG	Actin, cytoplasmic 1 OS=Sus scrofa GN=ACTB PE=2 SV=2	0	99	SYELPDGQVITIGNER			1789.88	597.635	1789.88	597.635	3	19
90.36	73.33	Q6QAQ1	ACTB_PIG	Actin, cytoplasmic 1 OS=Sus scrofa GN=ACTB PE=2 SV=2	0	99	SYELPDGQVITIGNER	Deamidated(Q)@8		1790.89	896.45	1790.87	896.442	2	19
90.36	73.33	Q6QAQ1	ACTB_PIG	Actin, cytoplasmic 1 OS=Sus scrofa GN=ACTB PE=2 SV=2	0	99	SYELPDGQVITIGNER			1789.89	895.951	1789.88	895.95	2	23
90.36	73.33	Q6QAQ1	ACTB_PIG	Actin, cytoplasmic 1 OS=Sus scrofa GN=ACTB PE=2 SV=2	0	99	SYELPDGQVITIGNER			1789.89	895.951	1789.88	895.95	2	23
90.36	73.33	Q6QAQ1	ACTB_PIG	Actin, cytoplasmic 1 OS=Sus scrofa GN=ACTB PE=2 SV=2	0	99	SYELPDGQVITIGNER			1789.89	895.951	1789.88	895.95	2	9
90.36	73.33	Q6QAQ1	ACTB_PIG	Actin, cytoplasmic 1 OS=Sus scrofa GN=ACTB PE=2 SV=2	0	99	SYELPDGQVITIGNER			1789.89	895.951	1789.88	895.95	2	22
90.36	73.33	Q6QAQ1	ACTB_PIG	Actin, cytoplasmic 1 OS=Sus scrofa GN=ACTB PE=2 SV=2	0	99	SYELPDGQVITIGNER			1789.89	895.951	1789.88	895.95	2	22
90.36	73.33	Q6QAQ1	ACTB_PIG	Actin, cytoplasmic 1 OS=Sus scrofa GN=ACTB PE=2 SV=2	0	99	SYELPDGQVITIGNER			1789.89	597.636	1789.88	597.635	3	15
90.36	73.33	Q6QAQ1	ACTB_PIG	Actin, cytoplasmic 1 OS=Sus scrofa GN=ACTB PE=2 SV=2	0	99	SYELPDGQVITIGNER			1789.89	895.95	1789.88	895.95	2	18
90.36	73.33	Q6QAQ1	ACTB_PIG	Actin, cytoplasmic 1 OS=Sus scrofa GN=ACTB PE=2 SV=2	0	99	SYELPDGQVITIGNER	Deamidated(N)@14		1790.89	896.45	1790.87	896.442	2	13
90.36	73.33	Q6QAQ1	ACTB_PIG	Actin, cytoplasmic 1 OS=Sus scrofa GN=ACTB PE=2 SV=2	0	99	SYELPDGQVITIGNER			1789.89	895.951	1789.88	895.95	2	14
90.36	73.33	Q6QAQ1	ACTB_PIG	Actin, cytoplasmic 1 OS=Sus scrofa GN=ACTB PE=2 SV=2	0	99	SYELPDGQVITIGNER			1789.89	895.951	1789.88	895.95	2	17
90.36	73.33	Q6QAQ1	ACTB_PIG	Actin, cytoplasmic 1 OS=Sus scrofa GN=ACTB PE=2 SV=2	0	99	SYELPDGQVITIGNER			1789.89	895.951	1789.88	895.95	2	17
90.36	73.33	Q6QAQ1	ACTB_PIG	Actin, cytoplasmic 1 OS=Sus scrofa GN=ACTB PE=2 SV=2	0	99	SYELPDGQVITIGNER			1789.89	895.951	1789.88	895.95	2	15
90.36	73.33	Q6QAQ1	ACTB_PIG	Actin, cytoplasmic 1 OS=Sus scrofa GN=ACTB PE=2 SV=2	0	99	SYELPDGQVITIGNER			1789.89	895.951	1789.88	895.95	2	17
90.36	73.33	Q6QAQ1	ACTB_PIG	Actin, cytoplasmic 1 OS=Sus scrofa GN=ACTB PE=2 SV=2	0	99	SYELPDGQVITIGNER			1789.89	895.951	1789.88	895.95	2	17
90.36	73.33	Q6QAQ1	ACTB_PIG	Actin, cytoplasmic 1 OS=Sus scrofa GN=ACTB PE=2 SV=2	0	99	SYELPDGQVITIGNER			1789.89	895.951	1789.88	895.95	2	14
90.36	73.33	Q6QAQ1	ACTB_PIG	Actin, cytoplasmic 1 OS=Sus scrofa GN=ACTB PE=2 SV=2	0	99	SYELPDGQVITIGNER			1789.89	895.951	1789.88	895.95	2	14
90.36	73.33	Q6QAQ1	ACTB_PIG	Actin, cytoplasmic 1 OS=Sus scrofa GN=ACTB PE=2 SV=2	0	99	SYELPDGQVITIGNER			1789.91	597.643	1789.88	597.635	3	10
90.36	73.33	Q6QAQ1	ACTB_PIG	Actin, cytoplasmic 1 OS=Sus scrofa GN=ACTB PE=2 SV=2	0	99	SYELPDGQVITIGNER			1789.89	895.951	1789.88	895.95	2	12
90.36	73.33	Q6QAQ1	ACTB_PIG	Actin, cytoplasmic 1 OS=Sus scrofa GN=ACTB PE=2 SV=2	0	99	SYELPDGQVITIGNER			1789.89	895.951	1789.88	895.95	2	11
90.36	73.33	Q6QAQ1	ACTB_PIG	Actin, cytoplasmic 1 OS=Sus scrofa GN=ACTB PE=2 SV=2	0	99	SYELPDGQVITIGNER			1789.89	895.951	1789.88	895.95	2	12
90.36	73.33	Q6QAQ1	ACTB_PIG	Actin, cytoplasmic 1 OS=Sus scrofa GN=ACTB PE=2 SV=2	0	99	SYELPDGQVITIGNER			1789.88	895.947	1789.88	895.95	2	14
90.36	73.33	Q6QAQ1	ACTB_PIG	Actin, cytoplasmic 1 OS=Sus scrofa GN=ACTB PE=2 SV=2	0	99	SYELPDGQVITIGNER			1789.88	895.948	1789.88	895.95	2	11
90.36	73.33	Q6QAQ1	ACTB_PIG	Actin, cytoplasmic 1 OS=Sus scrofa GN=ACTB PE=2 SV=2	0	99	SYELPDGQVITIGNER			1789.88	895.949	1789.88	895.95	2	10
90.36	73.33	Q6QAQ1	ACTB_PIG	Actin, cytoplasmic 1 OS=Sus scrofa GN=ACTB PE=2 SV=2	0	99	SYELPDGQVITIGNER			1789.88	895.949	1789.88	895.95	2	12
90.36	73.33	Q6QAQ1	ACTB_PIG	Actin, cytoplasmic 1 OS=Sus scrofa GN=ACTB PE=2 SV=2	0	99	SYELPDGQVITIGNER			1789.89	895.951	1789.88	895.95	2	11
90.36	73.33	Q6QAQ1	ACTB_PIG	Actin, cytoplasmic 1 OS=Sus scrofa GN=ACTB PE=2 SV=2	0	99	SYELPDGQVITIGNER	Deamidated(N)@14		1790.89	896.451	1790.87	896.442	2	7
90.36	73.33	Q6QAQ1	ACTB_PIG	Actin, cytoplasmic 1 OS=Sus scrofa GN=ACTB PE=2 SV=2	0	99	SYELPDGQVITIGNER			1789.89	895.95	1789.88	895.95	2	12
90.36	73.33	Q6QAQ1	ACTB_PIG	Actin, cytoplasmic 1 OS=Sus scrofa GN=ACTB PE=2 SV=2	0	99	SYELPDGQVITIGNER			1789.89	895.951	1789.88	895.95	2	10
90.36	73.33	Q6QAQ1	ACTB_PIG	Actin, cytoplasmic 1 OS=Sus scrofa GN=ACTB PE=2 SV=2	0	99	SYELPDGQVITIGNER			1789.89	895.951	1789.88	895.95	2	10
90.36	73.33	Q6QAQ1	ACTB_PIG	Actin, cytoplasmic 1 OS=Sus scrofa GN=ACTB PE=2 SV=2	0	99	SYELPDGQVITIGNER			1789.89	895.95	1789.88	895.95	2	10
90.36	73.33	Q6QAQ1	ACTB_PIG	Actin, cytoplasmic 1 OS=Sus scrofa GN=ACTB PE=2 SV=2	0	99	SYELPDGQVITIGNER			1789.88	895.949	1789.88	895.95	2	11
90.36	73.33	Q6QAQ1	ACTB_PIG	Actin, cytoplasmic 1 OS=Sus scrofa GN=ACTB PE=2 SV=2	0	99	SYELPDGQVITIGNER			1789.88	895.948	1789.88	895.95	2	12
90.36	73.33	Q6QAQ1	ACTB_PIG	Actin, cytoplasmic 1 OS=Sus scrofa GN=ACTB PE=2 SV=2	0	99	SYELPDGQVITIGNER			1789.88	895.949	1789.88	895.95	2	10
90.36	73.33	Q6QAQ1	ACTB_PIG	Actin, cytoplasmic 1 OS=Sus scrofa GN=ACTB PE=2 SV=2	0	99	SYELPDGQVITIGNER			1789.88	895.948	1789.88	895.95	2	12
90.36	73.33	Q6QAQ1	ACTB_PIG	Actin, cytoplasmic 1 OS=Sus scrofa GN=ACTB PE=2 SV=2	0	99	SYELPDGQVITIGNER			1789.89	895.951	1789.88	895.95	2	8
90.36	73.33	Q6QAQ1	ACTB_PIG	Actin, cytoplasmic 1 OS=Sus scrofa GN=ACTB PE=2 SV=2	0	99	SYELPDGQVITIGNER			1789.89	895.95	1789.88	895.95	2	9
90.36	73.33	Q6QAQ1	ACTB_PIG	Actin, cytoplasmic 1 OS=Sus scrofa GN=ACTB PE=2 SV=2	0	99	SYELPDGQVITIGNER			1789.89	895.951	1789.88	895.95	2	8
90.36	73.33	Q6QAQ1	ACTB_PIG	Actin, cytoplasmic 1 OS=Sus scrofa GN=ACTB PE=2 SV=2	0	99	SYELPDGQVITIGNER			1789.88	895.948	1789.88	895.95	2	9
90.36	73.33	Q6QAQ1	ACTB_PIG	Actin, cytoplasmic 1 OS=Sus scrofa GN=ACTB PE=2 SV=2	0	99	SYELPDGQVITIGNER			1789.89	895.95	1789.88	895.95	2	7
90.36	73.33	Q6QAQ1	ACTB_PIG	Actin, cytoplasmic 1 OS=Sus scrofa GN=ACTB PE=2 SV=2	0	99	SYELPDGQVITIGNER			1789.89	895.95	1789.88	895.95	2	8
90.36	73.33	Q6QAQ1	ACTB_PIG	Actin, cytoplasmic 1 OS=Sus scrofa GN=ACTB PE=2 SV=2	0	99	SYELPDGQVITIGNER			1789.89	895.95	1789.88	895.95	2	6
90.36	73.33	Q6QAQ1	ACTB_PIG	Actin, cytoplasmic 1 OS=Sus scrofa GN=ACTB PE=2 SV=2	0	99	SYELPDGQVITIGNER			1789.88	895.948	1789.88	895.95	2	8
90.36	73.33	Q6QAQ1	ACTB_PIG	Actin, cytoplasmic 1 OS=Sus scrofa GN=ACTB PE=2 SV=2	0	99	SYELPDGQVITIGNER			1789.89	895.95	1789.88	895.95	2	6
90.36	73.33	Q6QAQ1	ACTB_PIG	Actin, cytoplasmic 1 OS=Sus scrofa GN=ACTB PE=2 SV=2	0	99	SYELPDGQVITIGNER			1789.88	895.949	1789.88	895.95	2	6
90.36	73.33	Q6QAQ1	ACTB_PIG	Actin, cytoplasmic 1 OS=Sus scrofa GN=ACTB PE=2 SV=2	0	99	SYELPDGQVITIGNER			1789.89	895.951	1789.88	895.95	2	9
90.36	73.33	Q6QAQ1	ACTB_PIG	Actin, cytoplasmic 1 OS=Sus scrofa GN=ACTB PE=2 SV=2	0	99	SYELPDGQVITIGNER			1789.89	895.95	1789.88	895.95	2	9
90.36	73.33	Q6QAQ1	ACTB_PIG	Actin, cytoplasmic 1 OS=Sus scrofa GN=ACTB PE=2 SV=2	0	99	SYELPDGQVITIGNER			1789.89	895.95	1789.88	895.95	2	8
90.36	73.33	Q6QAQ1	ACTB_PIG	Actin, cytoplasmic 1 OS=Sus scrofa GN=ACTB PE=2 SV=2	0	99	SYELPDGQVITIGNER			1789.88	895.949	1789.88	895.95	2	6
90.36	73.33	Q6QAQ1	ACTB_PIG	Actin, cytoplasmic 1 OS=Sus scrofa GN=ACTB PE=2 SV=2	0	99	SYELPDGQVITIGNER			1789.02	597.347	1789.88	597.635	3	7
90.36	73.33	Q6QAQ1	ACTB_PIG	Actin, cytoplasmic 1 OS=Sus scrofa GN=ACTB PE=2 SV=2	0	99	SYELPDGQVITIGNER			1789.01	597.345	1789.88	597.635	3	7
90.36	73.33	Q6QAQ1	ACTB_PIG	Actin, cytoplasmic 1 OS=Sus scrofa GN=ACTB PE=2 SV=2	0	99	SYELPDGQVITIGNER			1789.89	597.636	1789.88	597.635	3	14
90.36	73.33	Q6QAQ1	ACTB_PIG	Actin, cytoplasmic 1 OS=Sus scrofa GN=ACTB PE=2 SV=2	0	99	SYELPDGQVITIGNER			1789.89	895.95	1789.88	895.95	2	20
90.36	73.33	Q6QAQ1	ACTB_PIG	Actin, cytoplasmic 1 OS=Sus scrofa GN=ACTB PE=2 SV=2	0	99	SYELPDGQVITIGNER			1789.89	895.95	1789.88	895.95	2	20
90.36	73.33	Q6QAQ1	ACTB_PIG	Actin, cytoplasmic 1 OS=Sus scrofa GN=ACTB PE=2 SV=2	0	99	SYELPDGQVITIGNER			1789.89	895.95	1789.88	895.95	2	17
90.36	73.33	Q6QAQ1	ACTB_PIG	Actin, cytoplasmic 1 OS=Sus scrofa GN=ACTB PE=2 SV=2	0	99	SYELPDGQVITIGNER			1789.89	895.95	1789.88	895.95	2	23
90.36	73.33	Q6QAQ1	ACTB_PIG	Actin, cytoplasmic 1 OS=Sus scrofa GN=ACTB PE=2 SV=2	0	99	SYELPDGQVITIGNER			1789.89	895.95	1789.88	895.95	2	18
90.36	73.33	Q6QAQ1	ACTB_PIG	Actin, cytoplasmic 1 OS=Sus scrofa GN=ACTB PE=2 SV=2	0	99	SYELPDGQVITIGNER			1789.89	895.95	1789.88	895.95	2	21
90.36	73.33	Q6QAQ1	ACTB_PIG	Actin, cytoplasmic 1 OS=Sus scrofa GN=ACTB PE=2 SV=2	0	99	SYELPDGQVITIGNER			1789.89	895.95	1789.88	895.95	2	21
90.36	73.33	Q6QAQ1	ACTB_PIG	Actin, cytoplasmic 1 OS=Sus scrofa GN=ACTB PE=2 SV=2	0	99	SYELPDGQVITIGNER			1789.88	597.635	1789.88	597.635	3	13
90.36	73.33	Q6QAQ1	ACTB_PIG	Actin, cytoplasmic 1 OS=Sus scrofa GN=ACTB PE=2 SV=2	0	99	SYELPDGQVITIGNER			1789.89	895.95	1789.88	895.95	2	20
90.36	73.33	Q6QAQ1	ACTB_PIG	Actin, cytoplasmic 1 OS=Sus scrofa GN=ACTB PE=2 SV=2	0	99	SYELPDGQVITIGNER			1789.88	597.635	1789.88	597.635	3	12
90.36	73.33	Q6QAQ1	ACTB_PIG	Actin, cytoplasmic 1 OS=Sus scrofa GN=ACTB PE=2 SV=2	0	99	SYELPDGQVITIGNER			1789.88	895.949	1789.88	895.95	2	14
90.36	73.33	Q6QAQ1	ACTB_PIG	Actin, cytoplasmic 1 OS=Sus scrofa GN=ACTB PE=2 SV=2	0	99	SYELPDGQVITIGNER			1789.89	895.95	1789.88	895.95	2	13
90.36	73.33	Q6QAQ1	ACTB_PIG	Actin, cytoplasmic 1 OS=Sus scrofa GN=ACTB PE=2 SV=2	0	99	SYELPDGQVITIGNER			1789.88	895.95	1789.88	895.95	2	15
90.36	73.33	Q6QAQ1	ACTB_PIG	Actin, cytoplasmic 1 OS=Sus scrofa GN=ACTB PE=2 SV=2	0	99	SYELPDGQVITIGNER			1789.88	895.949	1789.88	895.95	2	10
90.36	73.33	Q6QAQ1	ACTB_PIG	Actin, cytoplasmic 1 OS=Sus scrofa GN=ACTB PE=2 SV=2	0	99	SYELPDGQVITIGNER			1789.89	895.95	1789.88	895.95	2	13
90.36	73.33	Q6QAQ1	ACTB_PIG	Actin, cytoplasmic 1 OS=Sus scrofa GN=ACTB PE=2 SV=2	0	99	SYELPDGQVITIGNER			1789.89	895.95	1789.88	895.95	2	16
90.36	73.33	Q6QAQ1	ACTB_PIG	Actin, cytoplasmic 1 OS=Sus scrofa GN=ACTB PE=2 SV=2	0	99	SYELPDGQVITIGNER			1789.89	895.95	1789.88	895.95	2	15
90.36	73.33	Q6QAQ1	ACTB_PIG	Actin, cytoplasmic 1 OS=Sus scrofa GN=ACTB PE=2 SV=2	0	99	SYELPDGQVITIGNER			1789.89	895.95	1789.88	895.95	2	15
90.36	73.33	Q6QAQ1	ACTB_PIG	Actin, cytoplasmic 1 OS=Sus scrofa GN=ACTB PE=2 SV=2	0	99	SYELPDGQVITIGNER			1789.88	895.947	1789.88	895.95	2	11
90.36	73.33	Q6QAQ1	ACTB_PIG	Actin, cytoplasmic 1 OS=Sus scrofa GN=ACTB PE=2 SV=2	0	99	SYELPDGQVITIGNER			1789.88	895.95	1789.88	895.95	2	7
90.36	73.33	Q6QAQ1	ACTB_PIG	Actin, cytoplasmic 1 OS=Sus scrofa GN=ACTB PE=2 SV=2	0	99	SYELPDGQVITIGNER			1789.92	895.965	1789.88	895.95	2	10
90.36	73.33	Q6QAQ1	ACTB_PIG	Actin, cytoplasmic 1 OS=Sus scrofa GN=ACTB PE=2 SV=2	0	99	SYELPDGQVITIGNER			1789.88	895.949	1789.88	895.95	2	8
90.36	73.33	Q6QAQ1	ACTB_PIG	Actin, cytoplasmic 1 OS=Sus scrofa GN=ACTB PE=2 SV=2	0	99	SYELPDGQVITIGNER			1789.88	895.949	1789.88	895.95	2	6
90.36	73.33	Q6QAQ1	ACTB_PIG	Actin, cytoplasmic 1 OS=Sus scrofa GN=ACTB PE=2 SV=2	0	99	SYELPDGQVITIGNER			1789.89	895.953	1789.88	895.95	2	6
90.36	73.33	Q6QAQ1	ACTB_PIG	Actin, cytoplasmic 1 OS=Sus scrofa GN=ACTB PE=2 SV=2	0	99	SYELPDGQVITIGNER			1789.88	895.947	1789.88	895.95	2	7
90.36	73.33	Q6QAQ1	ACTB_PIG	Actin, cytoplasmic 1 OS=Sus scrofa GN=ACTB PE=2 SV=2	0	99	SYELPDGQVITIGNER			1789.89	895.95	1789.88	895.95	2	15
90.36	73.33	Q6QAQ1	ACTB_PIG	Actin, cytoplasmic 1 OS=Sus scrofa GN=ACTB PE=2 SV=2	0	99	SYELPDGQVITIGNER			1789.89	597.638	1789.88	597.635	3	11
90.36	73.33	Q6QAQ1	ACTB_PIG	Actin, cytoplasmic 1 OS=Sus scrofa GN=ACTB PE=2 SV=2	0	99	SYELPDGQVITIGNER			1789.88	597.635	1789.88	597.635	3	15
90.36	73.33	Q6QAQ1	ACTB_PIG	Actin, cytoplasmic 1 OS=Sus scrofa GN=ACTB PE=2 SV=2	0	99	SYELPDGQVITIGNER			1789.89	895.951	1789.88	895.95	2	18
90.36	73.33	Q6QAQ1	ACTB_PIG	Actin, cytoplasmic 1 OS=Sus scrofa GN=ACTB PE=2 SV=2	0	99	SYELPDGQVITIGNER			1789.89	895.951	1789.88	895.95	2	21
90.36	73.33	Q6QAQ1	ACTB_PIG	Actin, cytoplasmic 1 OS=Sus scrofa GN=ACTB PE=2 SV=2	0	99	SYELPDGQVITIGNER			1789.89	895.951	1789.88	895.95	2	20
90.36	73.33	Q6QAQ1	ACTB_PIG	Actin, cytoplasmic 1 OS=Sus scrofa GN=ACTB PE=2 SV=2	0	99	SYELPDGQVITIGNER			1789.89	895.951	1789.88	895.95	2	21
90.36	73.33	Q6QAQ1	ACTB_PIG	Actin, cytoplasmic 1 OS=Sus scrofa GN=ACTB PE=2 SV=2	0	99	SYELPDGQVITIGNER			1789.89	895.951	1789.88	895.95	2	22
90.36	73.33	Q6QAQ1	ACTB_PIG	Actin, cytoplasmic 1 OS=Sus scrofa GN=ACTB PE=2 SV=2	0	99	SYELPDGQVITIGNER			1789.89	895.951	1789.88	895.95	2	22
90.36	73.33	Q6QAQ1	ACTB_PIG	Actin, cytoplasmic 1 OS=Sus scrofa GN=ACTB PE=2 SV=2	0	99	SYELPDGQVITIGNER			1789.89	895.951	1789.88	895.95	2	18
90.36	73.33	Q6QAQ1	ACTB_PIG	Actin, cytoplasmic 1 OS=Sus scrofa GN=ACTB PE=2 SV=2	0	99	SYELPDGQVITIGNER			1789.89	895.95	1789.88	895.95	2	14
90.36	73.33	Q6QAQ1	ACTB_PIG	Actin, cytoplasmic 1 OS=Sus scrofa GN=ACTB PE=2 SV=2	0	99	SYELPDGQVITIGNER			1789.89	895.951	1789.88	895.95	2	17
90.36	73.33	Q6QAQ1	ACTB_PIG	Actin, cytoplasmic 1 OS=Sus scrofa GN=ACTB PE=2 SV=2	0	99	SYELPDGQVITIGNER			1789.89	895.951	1789.88	895.95	2	12
90.36	73.33	Q6QAQ1	ACTB_PIG	Actin, cytoplasmic 1 OS=Sus scrofa GN=ACTB PE=2 SV=2	0	99	SYELPDGQVITIGNER			1789.92	895.969	1789.88	895.95	2	10
90.36	73.33	Q6QAQ1	ACTB_PIG	Actin, cytoplasmic 1 OS=Sus scrofa GN=ACTB PE=2 SV=2	0	99	SYELPDGQVITIGNER			1789.88	895.948	1789.88	895.95	2	18
90.36	73.33	Q6QAQ1	ACTB_PIG	Actin, cytoplasmic 1 OS=Sus scrofa GN=ACTB PE=2 SV=2	0	99	SYELPDGQVITIGNER			1789.88	895.948	1789.88	895.95	2	14
90.36	73.33	Q6QAQ1	ACTB_PIG	Actin, cytoplasmic 1 OS=Sus scrofa GN=ACTB PE=2 SV=2	0	99	SYELPDGQVITIGNER			1789.88	895.95	1789.88	895.95	2	14
90.36	73.33	Q6QAQ1	ACTB_PIG	Actin, cytoplasmic 1 OS=Sus scrofa GN=ACTB PE=2 SV=2	0	99	SYELPDGQVITIGNER			1789.88	895.95	1789.88	895.95	2	20
90.36	73.33	Q6QAQ1	ACTB_PIG	Actin, cytoplasmic 1 OS=Sus scrofa GN=ACTB PE=2 SV=2	0	99	SYELPDGQVITIGNER			1789.88	895.95	1789.88	895.95	2	21
90.36	73.33	Q6QAQ1	ACTB_PIG	Actin, cytoplasmic 1 OS=Sus scrofa GN=ACTB PE=2 SV=2	0	99	SYELPDGQVITIGNER			1789.88	895.949	1789.88	895.95	2	19
90.36	73.33	Q6QAQ1	ACTB_PIG	Actin, cytoplasmic 1 OS=Sus scrofa GN=ACTB PE=2 SV=2	0	99	SYELPDGQVITIGNER			1789.88	895.949	1789.88	895.95	2	15
90.36	73.33	Q6QAQ1	ACTB_PIG	Actin, cytoplasmic 1 OS=Sus scrofa GN=ACTB PE=2 SV=2	0	99	SYELPDGQVITIGNER			1789.89	895.951	1789.88	895.95	2	11
90.36	73.33	Q6QAQ1	ACTB_PIG	Actin, cytoplasmic 1 OS=Sus scrofa GN=ACTB PE=2 SV=2	0	99	SYELPDGQVITIGNER			1789.88	895.948	1789.88	895.95	2	14
90.36	73.33	Q6QAQ1	ACTB_PIG	Actin, cytoplasmic 1 OS=Sus scrofa GN=ACTB PE=2 SV=2	0	99	SYELPDGQVITIGNER	Deamidated(N)@14		1790.88	597.966	1790.87	597.964	3	18
90.36	73.33	Q6QAQ1	ACTB_PIG	Actin, cytoplasmic 1 OS=Sus scrofa GN=ACTB PE=2 SV=2	0	99	SYELPDGQVITIGNER			1789.89	895.951	1789.88	895.95	2	14
90.36	73.33	Q6QAQ1	ACTB_PIG	Actin, cytoplasmic 1 OS=Sus scrofa GN=ACTB PE=2 SV=2	0	99	SYELPDGQVITIGNER			1789.88	895.949	1789.88	895.95	2	14
90.36	73.33	Q6QAQ1	ACTB_PIG	Actin, cytoplasmic 1 OS=Sus scrofa GN=ACTB PE=2 SV=2	0	99	SYELPDGQVITIGNER			1789.89	895.951	1789.88	895.95	2	8
90.36	73.33	Q6QAQ1	ACTB_PIG	Actin, cytoplasmic 1 OS=Sus scrofa GN=ACTB PE=2 SV=2	0	99	SYELPDGQVITIGNER			1789.88	895.949	1789.88	895.95	2	14
90.36	73.33	Q6QAQ1	ACTB_PIG	Actin, cytoplasmic 1 OS=Sus scrofa GN=ACTB PE=2 SV=2	0	99	SYELPDGQVITIGNER			1789.89	895.95	1789.88	895.95	2	13
90.36	73.33	Q6QAQ1	ACTB_PIG	Actin, cytoplasmic 1 OS=Sus scrofa GN=ACTB PE=2 SV=2	0	99	SYELPDGQVITIGNER			1789.89	895.95	1789.88	895.95	2	21
90.36	73.33	Q6QAQ1	ACTB_PIG	Actin, cytoplasmic 1 OS=Sus scrofa GN=ACTB PE=2 SV=2	0	99	SYELPDGQVITIGNER	Deamidated(N)@14		1790.89	896.451	1790.87	896.442	2	16
90.36	73.33	Q6QAQ1	ACTB_PIG	Actin, cytoplasmic 1 OS=Sus scrofa GN=ACTB PE=2 SV=2	0	99	SYELPDGQVITIGNER			1789.89	895.95	1789.88	895.95	2	24
90.36	73.33	Q6QAQ1	ACTB_PIG	Actin, cytoplasmic 1 OS=Sus scrofa GN=ACTB PE=2 SV=2	0	99	SYELPDGQVITIGNER			1789.89	895.95	1789.88	895.95	2	18
90.36	73.33	Q6QAQ1	ACTB_PIG	Actin, cytoplasmic 1 OS=Sus scrofa GN=ACTB PE=2 SV=2	0	99	SYELPDGQVITIGNER			1789.89	895.952	1789.88	895.95	2	14
90.36	73.33	Q6QAQ1	ACTB_PIG	Actin, cytoplasmic 1 OS=Sus scrofa GN=ACTB PE=2 SV=2	0	99	SYELPDGQVITIGNER			1789.89	895.952	1789.88	895.95	2	12
90.36	73.33	Q6QAQ1	ACTB_PIG	Actin, cytoplasmic 1 OS=Sus scrofa GN=ACTB PE=2 SV=2	0	99	SYELPDGQVITIGNER			1789.88	895.949	1789.88	895.95	2	13
90.36	73.33	Q6QAQ1	ACTB_PIG	Actin, cytoplasmic 1 OS=Sus scrofa GN=ACTB PE=2 SV=2	0	99	SYELPDGQVITIGNER			1789.89	895.95	1789.88	895.95	2	11
90.36	73.33	Q6QAQ1	ACTB_PIG	Actin, cytoplasmic 1 OS=Sus scrofa GN=ACTB PE=2 SV=2	0	99	SYELPDGQVITIGNER			1789.89	895.951	1789.88	895.95	2	11
90.36	73.33	Q6QAQ1	ACTB_PIG	Actin, cytoplasmic 1 OS=Sus scrofa GN=ACTB PE=2 SV=2	0	99	SYELPDGQVITIGNER			1789.88	895.948	1789.88	895.95	2	11
90.36	73.33	Q6QAQ1	ACTB_PIG	Actin, cytoplasmic 1 OS=Sus scrofa GN=ACTB PE=2 SV=2	0	99	SYELPDGQVITIGNER			1789.89	895.951	1789.88	895.95	2	13
90.36	73.33	Q6QAQ1	ACTB_PIG	Actin, cytoplasmic 1 OS=Sus scrofa GN=ACTB PE=2 SV=2	0	99	SYELPDGQVITIGNER			1789.89	895.951	1789.88	895.95	2	13
90.36	73.33	Q6QAQ1	ACTB_PIG	Actin, cytoplasmic 1 OS=Sus scrofa GN=ACTB PE=2 SV=2	0	99	SYELPDGQVITIGNER			1789.88	895.948	1789.88	895.95	2	12
90.36	73.33	Q6QAQ1	ACTB_PIG	Actin, cytoplasmic 1 OS=Sus scrofa GN=ACTB PE=2 SV=2	0	99	SYELPDGQVITIGNER	Acetyl@N-term; Amino(Y)@2		1846.91	924.461	1846.91	924.46	2	20
90.36	73.33	Q6QAQ1	ACTB_PIG	Actin, cytoplasmic 1 OS=Sus scrofa GN=ACTB PE=2 SV=2	0	99	SYELPDGQVITIGNER	Iodo(Y)@2		1915.78	958.898	1915.78	958.898	2	14
90.36	73.33	Q6QAQ1	ACTB_PIG	Actin, cytoplasmic 1 OS=Sus scrofa GN=ACTB PE=2 SV=2	0	99	SYELPDGQVITIGNER			1789.88	895.949	1789.88	895.95	2	9
90.36	73.33	Q6QAQ1	ACTB_PIG	Actin, cytoplasmic 1 OS=Sus scrofa GN=ACTB PE=2 SV=2	0	99	SYELPDGQVITIGNER			1788.88	895.449	1789.88	895.95	2	9
90.36	73.33	Q6QAQ1	ACTB_PIG	Actin, cytoplasmic 1 OS=Sus scrofa GN=ACTB PE=2 SV=2	0	99	SYELPDGQVITIGNER			1789.89	895.954	1789.88	895.95	2	7
90.36	73.33	Q6QAQ1	ACTB_PIG	Actin, cytoplasmic 1 OS=Sus scrofa GN=ACTB PE=2 SV=2	0	99	SYELPDGQVITIGNER			1789.89	895.952	1789.88	895.95	2	9
90.36	73.33	Q6QAQ1	ACTB_PIG	Actin, cytoplasmic 1 OS=Sus scrofa GN=ACTB PE=2 SV=2	0	99	SYELPDGQVITIGNER			1789.89	895.951	1789.88	895.95	2	11
90.36	73.33	Q6QAQ1	ACTB_PIG	Actin, cytoplasmic 1 OS=Sus scrofa GN=ACTB PE=2 SV=2	0	99	SYELPDGQVITIGNER			1789.89	895.95	1789.88	895.95	2	13
90.36	73.33	Q6QAQ1	ACTB_PIG	Actin, cytoplasmic 1 OS=Sus scrofa GN=ACTB PE=2 SV=2	0	99	SYELPDGQVITIGNER			1789.88	895.949	1789.88	895.95	2	9
90.36	73.33	Q6QAQ1	ACTB_PIG	Actin, cytoplasmic 1 OS=Sus scrofa GN=ACTB PE=2 SV=2	0	99	SYELPDGQVITIGNER			1789.88	895.947	1789.88	895.95	2	9
90.36	73.33	Q6QAQ1	ACTB_PIG	Actin, cytoplasmic 1 OS=Sus scrofa GN=ACTB PE=2 SV=2	0	99	SYELPDGQVITIGNER	Acetyl@N-term; Amino(Y)@2		1846.91	924.461	1846.91	924.46	2	17
90.36	73.33	Q6QAQ1	ACTB_PIG	Actin, cytoplasmic 1 OS=Sus scrofa GN=ACTB PE=2 SV=2	0	99	SYELPDGQVITIGNER			1789.89	895.952	1789.88	895.95	2	12
90.36	73.33	Q6QAQ1	ACTB_PIG	Actin, cytoplasmic 1 OS=Sus scrofa GN=ACTB PE=2 SV=2	0	99	SYELPDGQVITIGNER	Acetyl@N-term; Amino(Y)@2		1846.91	924.46	1846.91	924.46	2	20
90.36	73.33	Q6QAQ1	ACTB_PIG	Actin, cytoplasmic 1 OS=Sus scrofa GN=ACTB PE=2 SV=2	0	99	SYELPDGQVITIGNER	Deamidated(Q)@8		1790.89	896.452	1790.87	896.442	2	19
90.36	73.33	Q6QAQ1	ACTB_PIG	Actin, cytoplasmic 1 OS=Sus scrofa GN=ACTB PE=2 SV=2	0	99	SYELPDGQVITIGNER			1789.89	895.955	1789.88	895.95	2	7
90.36	73.33	Q6QAQ1	ACTB_PIG	Actin, cytoplasmic 1 OS=Sus scrofa GN=ACTB PE=2 SV=2	0	99	SYELPDGQVITIGNER			1789.88	895.949	1789.88	895.95	2	12
90.36	73.33	Q6QAQ1	ACTB_PIG	Actin, cytoplasmic 1 OS=Sus scrofa GN=ACTB PE=2 SV=2	0	99	SYELPDGQVITIGNER			1789.88	895.949	1789.88	895.95	2	9
90.36	73.33	Q6QAQ1	ACTB_PIG	Actin, cytoplasmic 1 OS=Sus scrofa GN=ACTB PE=2 SV=2	0	99	SYELPDGQVITIGNER	Acetyl@N-term; Amino(Y)@2		1846.91	924.46	1846.91	924.46	2	19
90.36	73.33	Q6QAQ1	ACTB_PIG	Actin, cytoplasmic 1 OS=Sus scrofa GN=ACTB PE=2 SV=2	0	99	SYELPDGQVITIGNER	Acetyl@N-term; Amino(Y)@2		1846.9	616.642	1846.91	616.643	3	18
90.36	73.33	Q6QAQ1	ACTB_PIG	Actin, cytoplasmic 1 OS=Sus scrofa GN=ACTB PE=2 SV=2	0	99	SYELPDGQVITIGNER			1789.89	597.637	1789.88	597.635	3	7
90.36	73.33	Q6QAQ1	ACTB_PIG	Actin, cytoplasmic 1 OS=Sus scrofa GN=ACTB PE=2 SV=2	0	99	SYELPDGQVITIGNER			1789.89	597.636	1789.88	597.635	3	8
90.36	73.33	Q6QAQ1	ACTB_PIG	Actin, cytoplasmic 1 OS=Sus scrofa GN=ACTB PE=2 SV=2	0	99	SYELPDGQVITIGNER	Acetyl@N-term; Amino(Y)@2		1846.91	924.46	1846.91	924.46	2	17
90.36	73.33	Q6QAQ1	ACTB_PIG	Actin, cytoplasmic 1 OS=Sus scrofa GN=ACTB PE=2 SV=2	0	99	SYELPDGQVITIGNER	Carboxymethyl@N-term		1847.89	924.954	1847.89	924.952	2	12
90.36	73.33	Q6QAQ1	ACTB_PIG	Actin, cytoplasmic 1 OS=Sus scrofa GN=ACTB PE=2 SV=2	0	99	SYELPDGQVITIGNER			1789.89	895.952	1789.88	895.95	2	11
90.36	73.33	Q6QAQ1	ACTB_PIG	Actin, cytoplasmic 1 OS=Sus scrofa GN=ACTB PE=2 SV=2	0	99	SYELPDGQVITIGNER			1789.88	895.949	1789.88	895.95	2	10
90.36	73.33	Q6QAQ1	ACTB_PIG	Actin, cytoplasmic 1 OS=Sus scrofa GN=ACTB PE=2 SV=2	0	99	SYELPDGQVITIGNER			1789.89	895.951	1789.88	895.95	2	8
90.36	73.33	Q6QAQ1	ACTB_PIG	Actin, cytoplasmic 1 OS=Sus scrofa GN=ACTB PE=2 SV=2	0	99	SYELPDGQVITIGNER			1788.89	895.45	1789.88	895.95	2	10
90.36	73.33	Q6QAQ1	ACTB_PIG	Actin, cytoplasmic 1 OS=Sus scrofa GN=ACTB PE=2 SV=2	0	99	SYELPDGQVITIGNER			1788.87	895.442	1789.88	895.95	2	12
90.36	73.33	Q6QAQ1	ACTB_PIG	Actin, cytoplasmic 1 OS=Sus scrofa GN=ACTB PE=2 SV=2	0	98.96	SYELPDGQVITIGNER			1789.89	895.953	1789.88	895.95	2	8
90.36	73.33	Q6QAQ1	ACTB_PIG	Actin, cytoplasmic 1 OS=Sus scrofa GN=ACTB PE=2 SV=2	0	98.96	SYELPDGQVITIGNER			1789.89	895.951	1789.88	895.95	2	7
90.36	73.33	Q6QAQ1	ACTB_PIG	Actin, cytoplasmic 1 OS=Sus scrofa GN=ACTB PE=2 SV=2	0	98.86	SYELPDGQVITIGNER	Deamidated(Q)@8		1790.88	896.449	1790.87	896.442	2	8
90.36	73.33	Q6QAQ1	ACTB_PIG	Actin, cytoplasmic 1 OS=Sus scrofa GN=ACTB PE=2 SV=2	0	98.46	SYELPDGQVITIGNER	Deamidated(N)@14		1790.86	896.437	1790.87	896.442	2	10
90.36	73.33	Q6QAQ1	ACTB_PIG	Actin, cytoplasmic 1 OS=Sus scrofa GN=ACTB PE=2 SV=2	0	98.44	SYELPDGQVITIGNER			1789.88	895.948	1789.88	895.95	2	8
90.36	73.33	Q6QAQ1	ACTB_PIG	Actin, cytoplasmic 1 OS=Sus scrofa GN=ACTB PE=2 SV=2	0	98.4	SYELPDGQVITIGNER			1788.88	895.448	1789.88	895.95	2	10
90.36	73.33	Q6QAQ1	ACTB_PIG	Actin, cytoplasmic 1 OS=Sus scrofa GN=ACTB PE=2 SV=2	0	98.07	SYELPDGQVITIGNER	Acetyl@N-term; Amino(Y)@2		1846.91	924.461	1846.91	924.46	2	17
90.36	73.33	Q6QAQ1	ACTB_PIG	Actin, cytoplasmic 1 OS=Sus scrofa GN=ACTB PE=2 SV=2	0	97.93	SYELPDGQVITIGNER			1789.89	895.951	1789.88	895.95	2	8
90.36	73.33	Q6QAQ1	ACTB_PIG	Actin, cytoplasmic 1 OS=Sus scrofa GN=ACTB PE=2 SV=2	0	97.9	SYELPDGQVITIGNER	Iodo(Y)@2		1915.78	958.899	1915.78	958.898	2	13
90.36	73.33	Q6QAQ1	ACTB_PIG	Actin, cytoplasmic 1 OS=Sus scrofa GN=ACTB PE=2 SV=2	0	97.55	SYELPDGQVITIGNER	Dioxidation(P)@5		1821.87	911.942	1821.87	911.945	2	12
90.36	73.33	Q6QAQ1	ACTB_PIG	Actin, cytoplasmic 1 OS=Sus scrofa GN=ACTB PE=2 SV=2	0	97.54	SYELPDGQVITIGNER	Deamidated(N)@14		1790.88	597.966	1790.87	597.964	3	10
90.36	73.33	Q6QAQ1	ACTB_PIG	Actin, cytoplasmic 1 OS=Sus scrofa GN=ACTB PE=2 SV=2	0	97.26	SYELPDGQVITIGNER	Acetyl@N-term; Amino(Y)@2		1846.91	616.645	1846.91	616.643	3	13
90.36	73.33	Q6QAQ1	ACTB_PIG	Actin, cytoplasmic 1 OS=Sus scrofa GN=ACTB PE=2 SV=2	0	96.98	SYELPDGQVITIGNER	Carboxymethyl@N-term		1847.9	924.955	1847.89	924.952	2	9
90.36	73.33	Q6QAQ1	ACTB_PIG	Actin, cytoplasmic 1 OS=Sus scrofa GN=ACTB PE=2 SV=2	0	96.81	SYELPDGQVITIGNER			1789.89	895.951	1789.88	895.95	2	9
90.36	73.33	Q6QAQ1	ACTB_PIG	Actin, cytoplasmic 1 OS=Sus scrofa GN=ACTB PE=2 SV=2	0	96.81	SYELPDGQVITIGNER	Methyl(N)@14; Carbamyl(R)@16		1846.91	924.463	1846.91	924.46	2	13
90.36	73.33	Q6QAQ1	ACTB_PIG	Actin, cytoplasmic 1 OS=Sus scrofa GN=ACTB PE=2 SV=2	0	96.36	SYELPDGQVITIGNER	Oxidation(Y)@2		1805.88	903.949	1805.88	903.947	2	10
90.36	73.33	Q6QAQ1	ACTB_PIG	Actin, cytoplasmic 1 OS=Sus scrofa GN=ACTB PE=2 SV=2	0	96.32	SYELPDGQVITIGNER			1789.89	895.951	1789.88	895.95	2	6
90.36	73.33	Q6QAQ1	ACTB_PIG	Actin, cytoplasmic 1 OS=Sus scrofa GN=ACTB PE=2 SV=2	0	96.03	SYELPDGQVITIGNER	Iodo(Y)@2		1915.78	958.899	1915.78	958.898	2	9
90.36	73.33	Q6QAQ1	ACTB_PIG	Actin, cytoplasmic 1 OS=Sus scrofa GN=ACTB PE=2 SV=2	0	95.85	SYELPDGQVITIGNER	Acetyl@N-term; Amino(Y)@2		1846.91	924.461	1846.91	924.46	2	11
90.36	73.33	Q6QAQ1	ACTB_PIG	Actin, cytoplasmic 1 OS=Sus scrofa GN=ACTB PE=2 SV=2	0	95.77	SYELPDGQVITIGNER	Deamidated(N)@14		1790.88	597.966	1790.87	597.964	3	9
90.36	73.33	Q6QAQ1	ACTB_PIG	Actin, cytoplasmic 1 OS=Sus scrofa GN=ACTB PE=2 SV=2	0	95.77	SYELPDGQVITIGNER			1789.89	895.951	1789.88	895.95	2	8
90.36	73.33	Q6QAQ1	ACTB_PIG	Actin, cytoplasmic 1 OS=Sus scrofa GN=ACTB PE=2 SV=2	0	95.66	SYELPDGQVITIGNER	Dehydrated(D)@6		1771.87	886.943	1771.87	886.944	2	12
90.36	73.33	Q6QAQ1	ACTB_PIG	Actin, cytoplasmic 1 OS=Sus scrofa GN=ACTB PE=2 SV=2	0	95.23	SYELPDGQVITIGNER	Iodo(Y)@2		1915.78	958.899	1915.78	958.898	2	12
90.36	73.33	Q6QAQ1	ACTB_PIG	Actin, cytoplasmic 1 OS=Sus scrofa GN=ACTB PE=2 SV=2	0	94.8	SYELPDGQVITIGNER			1789.88	895.945	1789.88	895.95	2	7
90.36	73.33	Q6QAQ1	ACTB_PIG	Actin, cytoplasmic 1 OS=Sus scrofa GN=ACTB PE=2 SV=2	0	94.75	SYELPDGQVITIGNER	Oxidation(Y)@2		1805.88	903.947	1805.88	903.947	2	9
90.36	73.33	Q6QAQ1	ACTB_PIG	Actin, cytoplasmic 1 OS=Sus scrofa GN=ACTB PE=2 SV=2	0	94.71	SYELPDGQVITIGNER	Acetyl@N-term; Amino(Y)@2		1846.91	924.461	1846.91	924.46	2	15
90.36	73.33	Q6QAQ1	ACTB_PIG	Actin, cytoplasmic 1 OS=Sus scrofa GN=ACTB PE=2 SV=2	0	94.17	SYELPDGQVITIGNER	Acetyl@N-term; Amino(Y)@2		1846.9	616.642	1846.91	616.643	3	9
90.36	73.33	Q6QAQ1	ACTB_PIG	Actin, cytoplasmic 1 OS=Sus scrofa GN=ACTB PE=2 SV=2	0	93.96	SYELPDGQVITIGNER	Acetyl@N-term; Amino(Y)@2		1846.91	924.46	1846.91	924.46	2	13
90.36	73.33	Q6QAQ1	ACTB_PIG	Actin, cytoplasmic 1 OS=Sus scrofa GN=ACTB PE=2 SV=2	0	93.91	SYELPDGQVITIGNER	Acetyl@N-term; Amino(Y)@2		1846.91	924.461	1846.91	924.46	2	11
90.36	73.33	Q6QAQ1	ACTB_PIG	Actin, cytoplasmic 1 OS=Sus scrofa GN=ACTB PE=2 SV=2	0	93.16	SYELPDGQVITIGNER			1789.88	895.949	1789.88	895.95	2	6
90.36	73.33	Q6QAQ1	ACTB_PIG	Actin, cytoplasmic 1 OS=Sus scrofa GN=ACTB PE=2 SV=2	0	92.16	SYELPDGQVITIGNER			1788.91	597.311	1789.88	597.635	3	9
90.36	73.33	Q6QAQ1	ACTB_PIG	Actin, cytoplasmic 1 OS=Sus scrofa GN=ACTB PE=2 SV=2	0	91.73	SYELPDGQVITIGNER			1788.88	895.446	1789.88	895.95	2	9
90.36	73.33	Q6QAQ1	ACTB_PIG	Actin, cytoplasmic 1 OS=Sus scrofa GN=ACTB PE=2 SV=2	0	91.1	SYELPDGQVITIGNER			1789.88	895.949	1789.88	895.95	2	8
90.36	73.33	Q6QAQ1	ACTB_PIG	Actin, cytoplasmic 1 OS=Sus scrofa GN=ACTB PE=2 SV=2	0	90.56	SYELPDGQVITIGNER	Oxidation(Y)@2		1805.88	903.946	1805.88	903.947	2	11
90.36	73.33	Q6QAQ1	ACTB_PIG	Actin, cytoplasmic 1 OS=Sus scrofa GN=ACTB PE=2 SV=2	0	90.36	SYELPDGQVITIGNER	Carbamyl@N-term; Methyl(E)@3		1846.91	616.644	1846.91	616.643	3	9
90.36	73.33	Q6QAQ1	ACTB_PIG	Actin, cytoplasmic 1 OS=Sus scrofa GN=ACTB PE=2 SV=2	0	89.93	SYELPDGQVITIGNER	Acetyl@N-term; Amino(Y)@2		1846.9	924.459	1846.91	924.46	2	12
90.36	73.33	Q6QAQ1	ACTB_PIG	Actin, cytoplasmic 1 OS=Sus scrofa GN=ACTB PE=2 SV=2	0	88.54	SYELPDGQVITIGNER			1788.87	895.441	1789.88	895.95	2	7
90.36	73.33	Q6QAQ1	ACTB_PIG	Actin, cytoplasmic 1 OS=Sus scrofa GN=ACTB PE=2 SV=2	0	88.06	SYELPDGQVITIGNER	Iodo(Y)@2		1915.78	958.898	1915.78	958.898	2	9
90.36	73.33	Q6QAQ1	ACTB_PIG	Actin, cytoplasmic 1 OS=Sus scrofa GN=ACTB PE=2 SV=2	0	87.5	SYELPDGQVITIGNER	Acetyl@N-term; Amino(Y)@2		1846.91	924.462	1846.91	924.46	2	13
90.36	73.33	Q6QAQ1	ACTB_PIG	Actin, cytoplasmic 1 OS=Sus scrofa GN=ACTB PE=2 SV=2	0	87.44	SYELPDGQVITIGNER			1789.88	895.95	1789.88	895.95	2	8
90.36	73.33	Q6QAQ1	ACTB_PIG	Actin, cytoplasmic 1 OS=Sus scrofa GN=ACTB PE=2 SV=2	0	87.39	SYELPDGQVITIGNER	Iodo(Y)@2		1915.78	958.899	1915.78	958.898	2	10
90.36	73.33	Q6QAQ1	ACTB_PIG	Actin, cytoplasmic 1 OS=Sus scrofa GN=ACTB PE=2 SV=2	0	85.9	SYELPDGQVITIGNER	Acetyl@N-term; Amino(Y)@2		1846.91	924.461	1846.91	924.46	2	12
90.36	73.33	Q6QAQ1	ACTB_PIG	Actin, cytoplasmic 1 OS=Sus scrofa GN=ACTB PE=2 SV=2	0	85.69	SYELPDGQVITIGNER	Carbamyl@N-term; Methyl(E)@3		1846.91	924.461	1846.91	924.46	2	11
90.36	73.33	Q6QAQ1	ACTB_PIG	Actin, cytoplasmic 1 OS=Sus scrofa GN=ACTB PE=2 SV=2	0	83.44	SYELPDGQVITIGNER	Carbamyl@N-term; Methyl(E)@3		1846.91	616.642	1846.91	616.643	3	9
90.36	73.33	Q6QAQ1	ACTB_PIG	Actin, cytoplasmic 1 OS=Sus scrofa GN=ACTB PE=2 SV=2	0	82.5	SYELPDGQVITIGNER			1789.89	895.95	1789.88	895.95	2	6
90.36	73.33	Q6QAQ1	ACTB_PIG	Actin, cytoplasmic 1 OS=Sus scrofa GN=ACTB PE=2 SV=2	0	82.24	SYELPDGQVITIGNER			1789.88	895.949	1789.88	895.95	2	7
90.36	73.33	Q6QAQ1	ACTB_PIG	Actin, cytoplasmic 1 OS=Sus scrofa GN=ACTB PE=2 SV=2	0	81.97	SYELPDGQVITIGNER			1788.86	895.439	1789.88	895.95	2	9
90.36	73.33	Q6QAQ1	ACTB_PIG	Actin, cytoplasmic 1 OS=Sus scrofa GN=ACTB PE=2 SV=2	0	81.06	SYELPDGQVITIGNER			1788.88	895.448	1789.88	895.95	2	9
90.36	73.33	Q6QAQ1	ACTB_PIG	Actin, cytoplasmic 1 OS=Sus scrofa GN=ACTB PE=2 SV=2	0	79.27	SYELPDGQVITIGNER	Ammonia-loss(N)@14		1772.86	887.437	1772.86	887.436	2	7
90.36	73.33	Q6QAQ1	ACTB_PIG	Actin, cytoplasmic 1 OS=Sus scrofa GN=ACTB PE=2 SV=2	0	78.83	SYELPDGQVITIGNER	Dehydrated(D)@6		1771.87	886.942	1771.87	886.944	2	9
90.36	73.33	Q6QAQ1	ACTB_PIG	Actin, cytoplasmic 1 OS=Sus scrofa GN=ACTB PE=2 SV=2	0	77.94	SYELPDGQVITIGNER			1789.9	895.955	1789.88	895.95	2	7
90.36	73.33	Q6QAQ1	ACTB_PIG	Actin, cytoplasmic 1 OS=Sus scrofa GN=ACTB PE=2 SV=2	0	76.85	SYELPDGQVITIGNER			1788.89	895.454	1789.88	895.95	2	9
90.36	73.33	Q6QAQ1	ACTB_PIG	Actin, cytoplasmic 1 OS=Sus scrofa GN=ACTB PE=2 SV=2	0	74.75	SYELPDGQVITIGNER	Dehydrated(D)@6		1771.88	886.945	1771.87	886.944	2	8
90.36	73.33	Q6QAQ1	ACTB_PIG	Actin, cytoplasmic 1 OS=Sus scrofa GN=ACTB PE=2 SV=2	0	74.41	SYELPDGQVITIGNER	Acetyl@N-term; Amino(Y)@2		1846.91	924.46	1846.91	924.46	2	13
90.36	73.33	Q6QAQ1	ACTB_PIG	Actin, cytoplasmic 1 OS=Sus scrofa GN=ACTB PE=2 SV=2	0	73.36	SYELPDGQVITIGNER	Iodo(Y)@2		1915.78	639.602	1915.78	639.601	3	6
90.36	73.33	Q6QAQ1	ACTB_PIG	Actin, cytoplasmic 1 OS=Sus scrofa GN=ACTB PE=2 SV=2	0	72.09	SYELPDGQVITIGNER			1789.88	895.949	1789.88	895.95	2	6
90.36	73.33	Q6QAQ1	ACTB_PIG	Actin, cytoplasmic 1 OS=Sus scrofa GN=ACTB PE=2 SV=2	0	70.55	SYELPDGQVITIGNER	Deamidated(N)@14		1790.88	896.449	1790.87	896.442	2	8
90.36	73.33	Q6QAQ1	ACTB_PIG	Actin, cytoplasmic 1 OS=Sus scrofa GN=ACTB PE=2 SV=2	0	67.53	SYELPDGQVITIGNER	Carboxymethyl@N-term		1847.89	924.954	1847.89	924.952	2	7
90.36	73.33	Q6QAQ1	ACTB_PIG	Actin, cytoplasmic 1 OS=Sus scrofa GN=ACTB PE=2 SV=2	0	66.84	SYELPDGQVITIGNER			1789.9	895.956	1789.88	895.95	2	6
90.36	73.33	Q6QAQ1	ACTB_PIG	Actin, cytoplasmic 1 OS=Sus scrofa GN=ACTB PE=2 SV=2	0	60.18	SYELPDGQVITIGNER	Dioxidation(P)@5		1821.87	911.944	1821.87	911.945	2	7
90.36	73.33	Q6QAQ1	ACTB_PIG	Actin, cytoplasmic 1 OS=Sus scrofa GN=ACTB PE=2 SV=2	0	52.25	SYELPDGQVITIGNER	Deamidated(Q)@8; Deamidated(N)@14		1791.87	896.944	1791.85	896.934	2	7
90.36	73.33	Q6QAQ1	ACTB_PIG	Actin, cytoplasmic 1 OS=Sus scrofa GN=ACTB PE=2 SV=2	0	48.97	SYELPDGQVITIGNER			1789.88	895.949	1789.88	895.95	2	5
90.36	73.33	Q6QAQ1	ACTB_PIG	Actin, cytoplasmic 1 OS=Sus scrofa GN=ACTB PE=2 SV=2	0	48.97	SYELPDGQVITIGNER			1789.88	895.949	1789.88	895.95	2	5
90.36	73.33	Q6QAQ1	ACTB_PIG	Actin, cytoplasmic 1 OS=Sus scrofa GN=ACTB PE=2 SV=2	0	45.86	SYELPDGQVITIGNER	Deamidated(Q)@8		1790.89	896.453	1790.87	896.442	2	6
90.36	73.33	Q6QAQ1	ACTB_PIG	Actin, cytoplasmic 1 OS=Sus scrofa GN=ACTB PE=2 SV=2	0	36.65	SYELPDGQVITIGNER			1789.89	895.95	1789.88	895.95	2	7
90.36	73.33	Q6QAQ1	ACTB_PIG	Actin, cytoplasmic 1 OS=Sus scrofa GN=ACTB PE=2 SV=2	0	36.65	SYELPDGQVITIGNER	Deamidated(Q)@8		1790.88	896.447	1790.87	896.442	2	6
90.36	73.33	Q6QAQ1	ACTB_PIG	Actin, cytoplasmic 1 OS=Sus scrofa GN=ACTB PE=2 SV=2	0	34.88	SYELPDGQVITIGNER			1789.88	895.949	1789.88	895.95	2	6
90.36	73.33	Q6QAQ1	ACTB_PIG	Actin, cytoplasmic 1 OS=Sus scrofa GN=ACTB PE=2 SV=2	0	30.36	SYELPDGQVITIGNER	Deamidated(Q)@8; Deamidated(N)@14		1791.88	896.946	1791.85	896.934	2	8
90.36	73.33	Q6QAQ1	ACTB_PIG	Actin, cytoplasmic 1 OS=Sus scrofa GN=ACTB PE=2 SV=2	0	27.56	SYELPDGQVITIGNER			1789.89	895.953	1789.88	895.95	2	4
90.36	73.33	Q6QAQ1	ACTB_PIG	Actin, cytoplasmic 1 OS=Sus scrofa GN=ACTB PE=2 SV=2	0	27.17	SYELPDGQVITIGNER	Carboxymethyl@N-term		1847.91	924.962	1847.89	924.952	2	7
90.36	73.33	Q6QAQ1	ACTB_PIG	Actin, cytoplasmic 1 OS=Sus scrofa GN=ACTB PE=2 SV=2	0	25.8	SYELPDGQVITIGNER			1789.88	895.949	1789.88	895.95	2	5
90.36	73.33	Q6QAQ1	ACTB_PIG	Actin, cytoplasmic 1 OS=Sus scrofa GN=ACTB PE=2 SV=2	0	24.66	SYELPDGQVITIGNER	Deamidated(N)@14		1790.89	896.452	1790.87	896.442	2	7
90.36	73.33	Q6QAQ1	ACTB_PIG	Actin, cytoplasmic 1 OS=Sus scrofa GN=ACTB PE=2 SV=2	0	23.66	SYELPDGQVITIGNER			1789.89	895.95	1789.88	895.95	2	5
90.36	73.33	Q6QAQ1	ACTB_PIG	Actin, cytoplasmic 1 OS=Sus scrofa GN=ACTB PE=2 SV=2	0	23.4	SYELPDGQVITIGNER			1789.89	597.636	1789.88	597.635	3	4
90.36	73.33	Q6QAQ1	ACTB_PIG	Actin, cytoplasmic 1 OS=Sus scrofa GN=ACTB PE=2 SV=2	0	23	SYELPDGQVITIGNER			1789.92	895.969	1789.88	895.95	2	5
90.36	73.33	Q6QAQ1	ACTB_PIG	Actin, cytoplasmic 1 OS=Sus scrofa GN=ACTB PE=2 SV=2	0	22.99	SYELPDGQVITIGNER	Deamidated(Q)@8; Deamidated(N)@14		1791.85	896.932	1791.85	896.934	2	7
90.36	73.33	Q6QAQ1	ACTB_PIG	Actin, cytoplasmic 1 OS=Sus scrofa GN=ACTB PE=2 SV=2	0	22.52	SYELPDGQVITIGNER			1789.88	895.949	1789.88	895.95	2	4
90.36	73.33	Q6QAQ1	ACTB_PIG	Actin, cytoplasmic 1 OS=Sus scrofa GN=ACTB PE=2 SV=2	0	21.33	SYELPDGQVITIGNER			1789.9	597.64	1789.88	597.635	3	5
90.36	73.33	Q6QAQ1	ACTB_PIG	Actin, cytoplasmic 1 OS=Sus scrofa GN=ACTB PE=2 SV=2	0	19.15	SYELPDGQVITIGNER			1789.89	895.951	1789.88	895.95	2	5
90.36	73.33	Q6QAQ1	ACTB_PIG	Actin, cytoplasmic 1 OS=Sus scrofa GN=ACTB PE=2 SV=2	0	17.39	SYELPDGQVITIGNER			1789.88	597.634	1789.88	597.635	3	5
90.36	73.33	Q6QAQ1	ACTB_PIG	Actin, cytoplasmic 1 OS=Sus scrofa GN=ACTB PE=2 SV=2	0	17.38	SYELPDGQVITIGNER	Deamidated(Q)@8		1790.86	896.437	1790.87	896.442	2	8
90.36	73.33	Q6QAQ1	ACTB_PIG	Actin, cytoplasmic 1 OS=Sus scrofa GN=ACTB PE=2 SV=2	0	97.47	SYELPDGQVITIGNERF		cleaved F-R@C-term; missed R-F@16	1936.95	969.484	1936.95	969.484	2	12
90.36	73.33	Q6QAQ1	ACTB_PIG	Actin, cytoplasmic 1 OS=Sus scrofa GN=ACTB PE=2 SV=2	0	95.23	SYELPDGQVITIGNERF		cleaved F-R@C-term; missed R-F@16	1936.95	969.484	1936.95	969.484	2	10
90.36	73.33	Q6QAQ1	ACTB_PIG	Actin, cytoplasmic 1 OS=Sus scrofa GN=ACTB PE=2 SV=2	0	94.66	SYELPDGQVITIGNERF		cleaved F-R@C-term; missed R-F@16	1936.95	969.484	1936.95	969.484	2	11
90.36	73.33	Q6QAQ1	ACTB_PIG	Actin, cytoplasmic 1 OS=Sus scrofa GN=ACTB PE=2 SV=2	0	91.79	SYELPDGQVITIGNERF		cleaved F-R@C-term; missed R-F@16	1936.96	969.487	1936.95	969.484	2	12
90.36	73.33	Q6QAQ1	ACTB_PIG	Actin, cytoplasmic 1 OS=Sus scrofa GN=ACTB PE=2 SV=2	0	88.4	SYELPDGQVITIGNERF	Deamidated(N)@14	cleaved F-R@C-term; missed R-F@16	1937.93	969.974	1937.94	969.976	2	8
90.36	73.33	Q6QAQ1	ACTB_PIG	Actin, cytoplasmic 1 OS=Sus scrofa GN=ACTB PE=2 SV=2	0	85.42	SYELPDGQVITIGNERF		cleaved F-R@C-term; missed R-F@16	1936.95	969.481	1936.95	969.484	2	7
90.36	73.33	Q6QAQ1	ACTB_PIG	Actin, cytoplasmic 1 OS=Sus scrofa GN=ACTB PE=2 SV=2	0	80.14	SYELPDGQVITIGNERF		cleaved F-R@C-term; missed R-F@16	1936.95	969.482	1936.95	969.484	2	8
90.36	73.33	Q6QAQ1	ACTB_PIG	Actin, cytoplasmic 1 OS=Sus scrofa GN=ACTB PE=2 SV=2	0	33.37	SYELPDGQVITIGNERF	Deamidated(Q)@8	cleaved F-R@C-term; missed R-F@16	1937.95	969.985	1937.94	969.976	2	6
90.36	73.33	Q6QAQ1	ACTB_PIG	Actin, cytoplasmic 1 OS=Sus scrofa GN=ACTB PE=2 SV=2	0	96.69	TTGIVMDSGDGVTH		cleaved H-T@C-term	1388.63	695.323	1388.62	695.319	2	9
90.36	73.33	Q6QAQ1	ACTB_PIG	Actin, cytoplasmic 1 OS=Sus scrofa GN=ACTB PE=2 SV=2	0	50.89	TTGIVMDSGDGVTH		cleaved H-T@C-term	1388.66	695.336	1388.62	695.319	2	7
90.36	73.33	Q6QAQ1	ACTB_PIG	Actin, cytoplasmic 1 OS=Sus scrofa GN=ACTB PE=2 SV=2	0	80.5	TTGIVMDSGDGVTHTVPIYEGY		cleaved Y-A@C-term	2311.07	771.365	2311.07	771.363	3	7
90.36	73.33	Q6QAQ1	ACTB_PIG	Actin, cytoplasmic 1 OS=Sus scrofa GN=ACTB PE=2 SV=2	0	58.89	TTGIVMDSGDGVTHTVPIYEGY		cleaved Y-A@C-term	2311.08	771.369	2311.07	771.363	3	9
90.36	73.33	Q6QAQ1	ACTB_PIG	Actin, cytoplasmic 1 OS=Sus scrofa GN=ACTB PE=2 SV=2	0	99	TTGIVMDSGDGVTHTVPIYEGYALPH		cleaved H-A@C-term	2729.3	910.774	2729.3	910.774	3	14
90.36	73.33	Q6QAQ1	ACTB_PIG	Actin, cytoplasmic 1 OS=Sus scrofa GN=ACTB PE=2 SV=2	0	99	TTGIVMDSGDGVTHTVPIYEGYALPH		cleaved H-A@C-term	2729.31	683.334	2729.3	683.332	4	9
90.36	73.33	Q6QAQ1	ACTB_PIG	Actin, cytoplasmic 1 OS=Sus scrofa GN=ACTB PE=2 SV=2	0	99	TTGIVMDSGDGVTHTVPIYEGYALPH		cleaved H-A@C-term	2729.3	910.774	2729.3	910.774	3	13
90.36	73.33	Q6QAQ1	ACTB_PIG	Actin, cytoplasmic 1 OS=Sus scrofa GN=ACTB PE=2 SV=2	0	99	TTGIVMDSGDGVTHTVPIYEGYALPH		cleaved H-A@C-term	2729.3	910.775	2729.3	910.774	3	11
90.36	73.33	Q6QAQ1	ACTB_PIG	Actin, cytoplasmic 1 OS=Sus scrofa GN=ACTB PE=2 SV=2	0	99	TTGIVMDSGDGVTHTVPIYEGYALPH		cleaved H-A@C-term	2729.3	910.774	2729.3	910.774	3	11
90.36	73.33	Q6QAQ1	ACTB_PIG	Actin, cytoplasmic 1 OS=Sus scrofa GN=ACTB PE=2 SV=2	0	98.87	TTGIVMDSGDGVTHTVPIYEGYALPH	Dethiomethyl(M)@6; Hex(T)@15	cleaved H-A@C-term	2843.34	711.843	2843.35	711.845	4	20
90.36	73.33	Q6QAQ1	ACTB_PIG	Actin, cytoplasmic 1 OS=Sus scrofa GN=ACTB PE=2 SV=2	0	98.63	TTGIVMDSGDGVTHTVPIYEGYALPH		cleaved H-A@C-term	2729.3	910.774	2729.3	910.774	3	10
90.36	73.33	Q6QAQ1	ACTB_PIG	Actin, cytoplasmic 1 OS=Sus scrofa GN=ACTB PE=2 SV=2	0	98.45	TTGIVMDSGDGVTHTVPIYEGYALPH	Oxidation(M)@6	cleaved H-A@C-term	2745.29	916.103	2745.3	916.106	3	13
90.36	73.33	Q6QAQ1	ACTB_PIG	Actin, cytoplasmic 1 OS=Sus scrofa GN=ACTB PE=2 SV=2	0	98.25	TTGIVMDSGDGVTHTVPIYEGYALPH		cleaved H-A@C-term	2729.3	910.775	2729.3	910.774	3	8
90.36	73.33	Q6QAQ1	ACTB_PIG	Actin, cytoplasmic 1 OS=Sus scrofa GN=ACTB PE=2 SV=2	0	97.98	TTGIVMDSGDGVTHTVPIYEGYALPH	Dethiomethyl(M)@6; Hex(Y)@19	cleaved H-A@C-term	2843.34	711.843	2843.35	711.845	4	15
90.36	73.33	Q6QAQ1	ACTB_PIG	Actin, cytoplasmic 1 OS=Sus scrofa GN=ACTB PE=2 SV=2	0	96.81	TTGIVMDSGDGVTHTVPIYEGYALPH		cleaved H-A@C-term	2729.3	910.774	2729.3	910.774	3	11
90.36	73.33	Q6QAQ1	ACTB_PIG	Actin, cytoplasmic 1 OS=Sus scrofa GN=ACTB PE=2 SV=2	0	96.32	TTGIVMDSGDGVTHTVPIYEGYALPH		cleaved H-A@C-term	2729.3	683.332	2729.3	683.332	4	7
90.36	73.33	Q6QAQ1	ACTB_PIG	Actin, cytoplasmic 1 OS=Sus scrofa GN=ACTB PE=2 SV=2	0	87.5	TTGIVMDSGDGVTHTVPIYEGYALPH	Dethiomethyl(M)@6; Hex(S)@8	cleaved H-A@C-term	2843.35	711.844	2843.35	711.845	4	15
90.36	73.33	Q6QAQ1	ACTB_PIG	Actin, cytoplasmic 1 OS=Sus scrofa GN=ACTB PE=2 SV=2	0	82.15	TTGIVMDSGDGVTHTVPIYEGYALPH		cleaved H-A@C-term	2729.31	910.776	2729.3	910.774	3	7
90.36	73.33	Q6QAQ1	ACTB_PIG	Actin, cytoplasmic 1 OS=Sus scrofa GN=ACTB PE=2 SV=2	0	77.79	TTGIVMDSGDGVTHTVPIYEGYALPH		cleaved H-A@C-term	2729.3	910.775	2729.3	910.774	3	10
90.36	73.33	Q6QAQ1	ACTB_PIG	Actin, cytoplasmic 1 OS=Sus scrofa GN=ACTB PE=2 SV=2	0	72.57	TTGIVMDSGDGVTHTVPIYEGYALPH	Oxidation(H)@14	cleaved H-A@C-term	2745.3	916.106	2745.3	916.106	3	11
90.36	73.33	Q6QAQ1	ACTB_PIG	Actin, cytoplasmic 1 OS=Sus scrofa GN=ACTB PE=2 SV=2	0	50.03	TTGIVMDSGDGVTHTVPIYEGYALPH		cleaved H-A@C-term	2729.3	910.775	2729.3	910.774	3	8
90.36	73.33	Q6QAQ1	ACTB_PIG	Actin, cytoplasmic 1 OS=Sus scrofa GN=ACTB PE=2 SV=2	0	28.45	TTGIVMDSGDGVTHTVPIYEGYALPH	Oxidation(M)@6	cleaved H-A@C-term	2745.3	916.107	2745.3	916.106	3	6
90.36	73.33	Q6QAQ1	ACTB_PIG	Actin, cytoplasmic 1 OS=Sus scrofa GN=ACTB PE=2 SV=2	0	99	TTGIVMDSGDGVTHTVPIYEGYALPHAILR			3182.61	796.659	3182.61	796.659	4	16
90.36	73.33	Q6QAQ1	ACTB_PIG	Actin, cytoplasmic 1 OS=Sus scrofa GN=ACTB PE=2 SV=2	0	99	TTGIVMDSGDGVTHTVPIYEGYALPHAILR			3182.61	796.66	3182.61	796.659	4	12
90.36	73.33	Q6QAQ1	ACTB_PIG	Actin, cytoplasmic 1 OS=Sus scrofa GN=ACTB PE=2 SV=2	0	99	TTGIVMDSGDGVTHTVPIYEGYALPHAILR			3182.61	796.66	3182.61	796.659	4	15
90.36	73.33	Q6QAQ1	ACTB_PIG	Actin, cytoplasmic 1 OS=Sus scrofa GN=ACTB PE=2 SV=2	0	99	TTGIVMDSGDGVTHTVPIYEGYALPHAILR			3182.61	1061.88	3182.61	1061.88	3	14
90.36	73.33	Q6QAQ1	ACTB_PIG	Actin, cytoplasmic 1 OS=Sus scrofa GN=ACTB PE=2 SV=2	0	99	TTGIVMDSGDGVTHTVPIYEGYALPHAILR			3182.61	796.66	3182.61	796.659	4	17
90.36	73.33	Q6QAQ1	ACTB_PIG	Actin, cytoplasmic 1 OS=Sus scrofa GN=ACTB PE=2 SV=2	0	99	TTGIVMDSGDGVTHTVPIYEGYALPHAILR			3182.61	796.66	3182.61	796.659	4	12
90.36	73.33	Q6QAQ1	ACTB_PIG	Actin, cytoplasmic 1 OS=Sus scrofa GN=ACTB PE=2 SV=2	0	99	TTGIVMDSGDGVTHTVPIYEGYALPHAILR			3182.61	1061.88	3182.61	1061.88	3	14
90.36	73.33	Q6QAQ1	ACTB_PIG	Actin, cytoplasmic 1 OS=Sus scrofa GN=ACTB PE=2 SV=2	0	99	TTGIVMDSGDGVTHTVPIYEGYALPHAILR			3182.61	796.66	3182.61	796.659	4	17
90.36	73.33	Q6QAQ1	ACTB_PIG	Actin, cytoplasmic 1 OS=Sus scrofa GN=ACTB PE=2 SV=2	0	99	TTGIVMDSGDGVTHTVPIYEGYALPHAILR			3182.6	796.658	3182.61	796.659	4	12
90.36	73.33	Q6QAQ1	ACTB_PIG	Actin, cytoplasmic 1 OS=Sus scrofa GN=ACTB PE=2 SV=2	0	99	TTGIVMDSGDGVTHTVPIYEGYALPHAILR			3182.61	796.659	3182.61	796.659	4	12
90.36	73.33	Q6QAQ1	ACTB_PIG	Actin, cytoplasmic 1 OS=Sus scrofa GN=ACTB PE=2 SV=2	0	99	TTGIVMDSGDGVTHTVPIYEGYALPHAILR			3182.61	1061.88	3182.61	1061.88	3	13
90.36	73.33	Q6QAQ1	ACTB_PIG	Actin, cytoplasmic 1 OS=Sus scrofa GN=ACTB PE=2 SV=2	0	99	TTGIVMDSGDGVTHTVPIYEGYALPHAILR	Dethiomethyl(M)@6; Hex(T)@15		3296.65	825.169	3296.66	825.171	4	17
90.36	73.33	Q6QAQ1	ACTB_PIG	Actin, cytoplasmic 1 OS=Sus scrofa GN=ACTB PE=2 SV=2	0	99	TTGIVMDSGDGVTHTVPIYEGYALPHAILR	Carbamyl@N-term; Methyl(T)@2		3239.63	810.914	3239.63	810.914	4	15
90.36	73.33	Q6QAQ1	ACTB_PIG	Actin, cytoplasmic 1 OS=Sus scrofa GN=ACTB PE=2 SV=2	0	99	TTGIVMDSGDGVTHTVPIYEGYALPHAILR	Carbamyl(M)@6; Methyl(D)@10		3239.63	810.915	3239.63	810.914	4	18
90.36	73.33	Q6QAQ1	ACTB_PIG	Actin, cytoplasmic 1 OS=Sus scrofa GN=ACTB PE=2 SV=2	0	98.77	TTGIVMDSGDGVTHTVPIYEGYALPHAILR	Dethiomethyl(M)@6; Hex(Y)@19		3296.66	825.171	3296.66	825.171	4	16
90.36	73.33	Q6QAQ1	ACTB_PIG	Actin, cytoplasmic 1 OS=Sus scrofa GN=ACTB PE=2 SV=2	0	98.76	TTGIVMDSGDGVTHTVPIYEGYALPHAILR	Carbamyl(M)@6; Methyl(D)@10		3239.63	810.916	3239.63	810.914	4	17
90.36	73.33	Q6QAQ1	ACTB_PIG	Actin, cytoplasmic 1 OS=Sus scrofa GN=ACTB PE=2 SV=2	0	98.75	TTGIVMDSGDGVTHTVPIYEGYALPHAILR	Carboxymethyl(H)@14		3240.63	811.164	3240.61	811.16	4	15
90.36	73.33	Q6QAQ1	ACTB_PIG	Actin, cytoplasmic 1 OS=Sus scrofa GN=ACTB PE=2 SV=2	0	98.69	TTGIVMDSGDGVTHTVPIYEGYALPHAILR	Carbamyl(M)@6; Methyl(D)@10		3239.63	810.914	3239.63	810.914	4	16
90.36	73.33	Q6QAQ1	ACTB_PIG	Actin, cytoplasmic 1 OS=Sus scrofa GN=ACTB PE=2 SV=2	0	98.51	TTGIVMDSGDGVTHTVPIYEGYALPHAILR	Dethiomethyl(M)@6		3134.6	627.928	3134.6	627.928	5	10
90.36	73.33	Q6QAQ1	ACTB_PIG	Actin, cytoplasmic 1 OS=Sus scrofa GN=ACTB PE=2 SV=2	0	98.09	TTGIVMDSGDGVTHTVPIYEGYALPHAILR	GlyGly(T)@15		3296.65	660.338	3296.65	660.337	5	14
90.36	73.33	Q6QAQ1	ACTB_PIG	Actin, cytoplasmic 1 OS=Sus scrofa GN=ACTB PE=2 SV=2	0	97.22	TTGIVMDSGDGVTHTVPIYEGYALPHAILR			3182.61	1061.88	3182.61	1061.88	3	10
90.36	73.33	Q6QAQ1	ACTB_PIG	Actin, cytoplasmic 1 OS=Sus scrofa GN=ACTB PE=2 SV=2	0	97.02	TTGIVMDSGDGVTHTVPIYEGYALPHAILR			3182.61	637.529	3182.61	637.529	5	9
90.36	73.33	Q6QAQ1	ACTB_PIG	Actin, cytoplasmic 1 OS=Sus scrofa GN=ACTB PE=2 SV=2	0	96.47	TTGIVMDSGDGVTHTVPIYEGYALPHAILR			3182.6	1061.88	3182.61	1061.88	3	10
90.36	73.33	Q6QAQ1	ACTB_PIG	Actin, cytoplasmic 1 OS=Sus scrofa GN=ACTB PE=2 SV=2	0	94.97	TTGIVMDSGDGVTHTVPIYEGYALPHAILR	Carbamyl@N-term; Methyl(T)@2		3239.63	810.916	3239.63	810.914	4	14
90.36	73.33	Q6QAQ1	ACTB_PIG	Actin, cytoplasmic 1 OS=Sus scrofa GN=ACTB PE=2 SV=2	0	93.28	TTGIVMDSGDGVTHTVPIYEGYALPHAILR			3182.61	796.66	3182.61	796.659	4	7
90.36	73.33	Q6QAQ1	ACTB_PIG	Actin, cytoplasmic 1 OS=Sus scrofa GN=ACTB PE=2 SV=2	0	88.78	TTGIVMDSGDGVTHTVPIYEGYALPHAILR	Carbamyl@N-term; Methyl(T)@2		3239.63	648.934	3239.63	648.933	5	14
90.36	73.33	Q6QAQ1	ACTB_PIG	Actin, cytoplasmic 1 OS=Sus scrofa GN=ACTB PE=2 SV=2	0	86.19	TTGIVMDSGDGVTHTVPIYEGYALPHAILR	Carboxymethyl@N-term		3240.63	649.133	3240.61	649.13	5	12
90.36	73.33	Q6QAQ1	ACTB_PIG	Actin, cytoplasmic 1 OS=Sus scrofa GN=ACTB PE=2 SV=2	0	82.8	TTGIVMDSGDGVTHTVPIYEGYALPHAILR	Carboxymethyl@N-term		3240.64	649.135	3240.61	649.13	5	8
90.36	73.33	Q6QAQ1	ACTB_PIG	Actin, cytoplasmic 1 OS=Sus scrofa GN=ACTB PE=2 SV=2	0	82.14	TTGIVMDSGDGVTHTVPIYEGYALPHAILR	Oxidation(M)@6; Methyl(D)@10; Delta:H(2)C(2)(H)@14		3238.6	810.658	3238.63	810.666	4	14
90.36	73.33	Q6QAQ1	ACTB_PIG	Actin, cytoplasmic 1 OS=Sus scrofa GN=ACTB PE=2 SV=2	0	81.12	TTGIVMDSGDGVTHTVPIYEGYALPHAILR	Carbamyl@N-term; Methyl(D)@10		3239.63	648.934	3239.63	648.933	5	13
90.36	73.33	Q6QAQ1	ACTB_PIG	Actin, cytoplasmic 1 OS=Sus scrofa GN=ACTB PE=2 SV=2	0	78.51	TTGIVMDSGDGVTHTVPIYEGYALPHAILR	Carbamyl@N-term; Methyl(T)@2		3239.63	810.914	3239.63	810.914	4	13
90.36	73.33	Q6QAQ1	ACTB_PIG	Actin, cytoplasmic 1 OS=Sus scrofa GN=ACTB PE=2 SV=2	0	78.51	TTGIVMDSGDGVTHTVPIYEGYALPHAILR	Carbamyl@N-term; Methyl(T)@2		3239.63	810.914	3239.63	810.914	4	13
90.36	73.33	Q6QAQ1	ACTB_PIG	Actin, cytoplasmic 1 OS=Sus scrofa GN=ACTB PE=2 SV=2	0	77.41	TTGIVMDSGDGVTHTVPIYEGYALPHAILR	Carbamyl@N-term; Methyl(T)@2		3239.63	648.934	3239.63	648.933	5	13
90.36	73.33	Q6QAQ1	ACTB_PIG	Actin, cytoplasmic 1 OS=Sus scrofa GN=ACTB PE=2 SV=2	0	74.38	TTGIVMDSGDGVTHTVPIYEGYALPHAILR	Carbamyl@N-term; Methyl(T)@2		3239.63	810.914	3239.63	810.914	4	13
90.36	73.33	Q6QAQ1	ACTB_PIG	Actin, cytoplasmic 1 OS=Sus scrofa GN=ACTB PE=2 SV=2	0	74.14	TTGIVMDSGDGVTHTVPIYEGYALPHAILR	Carbamyl@N-term; Methyl(H)@14		3239.63	648.934	3239.63	648.933	5	13
90.36	73.33	Q6QAQ1	ACTB_PIG	Actin, cytoplasmic 1 OS=Sus scrofa GN=ACTB PE=2 SV=2	0	67.56	TTGIVMDSGDGVTHTVPIYEGYALPHAILR	Carbamyl@N-term; Methyl(D)@10		3239.63	810.916	3239.63	810.914	4	10
90.36	73.33	Q6QAQ1	ACTB_PIG	Actin, cytoplasmic 1 OS=Sus scrofa GN=ACTB PE=2 SV=2	0	66.93	TTGIVMDSGDGVTHTVPIYEGYALPHAILR	Carbamyl@N-term; Methyl(T)@2		3239.63	810.914	3239.63	810.914	4	13
90.36	73.33	Q6QAQ1	ACTB_PIG	Actin, cytoplasmic 1 OS=Sus scrofa GN=ACTB PE=2 SV=2	0	52.25	TTGIVMDSGDGVTHTVPIYEGYALPHAILR	GlyGly(T)@15		3296.66	825.171	3296.65	825.17	4	11
90.36	73.33	Q6QAQ1	ACTB_PIG	Actin, cytoplasmic 1 OS=Sus scrofa GN=ACTB PE=2 SV=2	0	45.52	TTGIVMDSGDGVTHTVPIYEGYALPHAILR	Carbamyl@N-term; Methyl(H)@14		3239.63	648.933	3239.63	648.933	5	12
90.36	73.33	Q6QAQ1	ACTB_PIG	Actin, cytoplasmic 1 OS=Sus scrofa GN=ACTB PE=2 SV=2	0	31.04	TTGIVMDSGDGVTHTVPIYEGYALPHAILR	Carbamyl@N-term; Methyl(D)@10		3239.63	648.933	3239.63	648.933	5	11
90.36	73.33	Q6QAQ1	ACTB_PIG	Actin, cytoplasmic 1 OS=Sus scrofa GN=ACTB PE=2 SV=2	0	99	TVLSGGTTMYPGIADR		cleaved N-T@N-term	1637.81	819.912	1637.81	819.911	2	12
90.36	73.33	Q6QAQ1	ACTB_PIG	Actin, cytoplasmic 1 OS=Sus scrofa GN=ACTB PE=2 SV=2	0	99	TVLSGGTTMYPGIADR		cleaved N-T@N-term	1637.81	819.911	1637.81	819.911	2	13
90.36	73.33	Q6QAQ1	ACTB_PIG	Actin, cytoplasmic 1 OS=Sus scrofa GN=ACTB PE=2 SV=2	0	99	TVLSGGTTMYPGIADR		cleaved N-T@N-term	1637.81	819.911	1637.81	819.911	2	12
90.36	73.33	Q6QAQ1	ACTB_PIG	Actin, cytoplasmic 1 OS=Sus scrofa GN=ACTB PE=2 SV=2	0	85.76	TVLSGGTTMYPGIADR	Oxidation(M)@9	cleaved N-T@N-term	1653.81	827.91	1653.8	827.909	2	11
90.36	73.33	Q6QAQ1	ACTB_PIG	Actin, cytoplasmic 1 OS=Sus scrofa GN=ACTB PE=2 SV=2	0	16.23	TVPIYEGY		cleaved H-T@N-term; cleaved Y-A@C-term	940.455	471.235	940.454	471.234	2	5
90.36	73.33	Q6QAQ1	ACTB_PIG	Actin, cytoplasmic 1 OS=Sus scrofa GN=ACTB PE=2 SV=2	0	98.65	TVPIYEGYALPH		cleaved H-T@N-term; cleaved H-A@C-term	1358.69	680.351	1358.69	680.351	2	10
90.36	73.33	Q6QAQ1	ACTB_PIG	Actin, cytoplasmic 1 OS=Sus scrofa GN=ACTB PE=2 SV=2	0	98.49	TVPIYEGYALPH		cleaved H-T@N-term; cleaved H-A@C-term	1358.69	680.351	1358.69	680.351	2	9
90.36	73.33	Q6QAQ1	ACTB_PIG	Actin, cytoplasmic 1 OS=Sus scrofa GN=ACTB PE=2 SV=2	0	98.09	TVPIYEGYALPH		cleaved H-T@N-term; cleaved H-A@C-term	1358.68	680.35	1358.69	680.351	2	11
90.36	73.33	Q6QAQ1	ACTB_PIG	Actin, cytoplasmic 1 OS=Sus scrofa GN=ACTB PE=2 SV=2	0	90.4	TVPIYEGYALPH		cleaved H-T@N-term; cleaved H-A@C-term	1358.69	680.351	1358.69	680.351	2	11
90.36	73.33	Q6QAQ1	ACTB_PIG	Actin, cytoplasmic 1 OS=Sus scrofa GN=ACTB PE=2 SV=2	0	90.06	TVPIYEGYALPH		cleaved H-T@N-term; cleaved H-A@C-term	1358.69	680.351	1358.69	680.351	2	9
90.36	73.33	Q6QAQ1	ACTB_PIG	Actin, cytoplasmic 1 OS=Sus scrofa GN=ACTB PE=2 SV=2	0	76.69	TVPIYEGYALPH		cleaved H-T@N-term; cleaved H-A@C-term	1358.69	680.351	1358.69	680.351	2	9
90.36	73.33	Q6QAQ1	ACTB_PIG	Actin, cytoplasmic 1 OS=Sus scrofa GN=ACTB PE=2 SV=2	0	44.01	TVPIYEGYALPH		cleaved H-T@N-term; cleaved H-A@C-term	1358.69	680.351	1358.69	680.351	2	5
90.36	73.33	Q6QAQ1	ACTB_PIG	Actin, cytoplasmic 1 OS=Sus scrofa GN=ACTB PE=2 SV=2	0	22.03	TVPIYEGYALPH		cleaved H-T@N-term; cleaved H-A@C-term	1358.69	680.35	1358.69	680.351	2	6
90.36	73.33	Q6QAQ1	ACTB_PIG	Actin, cytoplasmic 1 OS=Sus scrofa GN=ACTB PE=2 SV=2	0	99	TVPIYEGYALPHAILR		cleaved H-T@N-term	1811.99	605.005	1811.99	605.005	3	10
90.36	73.33	Q6QAQ1	ACTB_PIG	Actin, cytoplasmic 1 OS=Sus scrofa GN=ACTB PE=2 SV=2	0	99	TVPIYEGYALPHAILR		cleaved H-T@N-term	1811.99	605.005	1811.99	605.005	3	12
90.36	73.33	Q6QAQ1	ACTB_PIG	Actin, cytoplasmic 1 OS=Sus scrofa GN=ACTB PE=2 SV=2	0	99	TVPIYEGYALPHAILR		cleaved H-T@N-term	1811.99	605.005	1811.99	605.005	3	12
90.36	73.33	Q6QAQ1	ACTB_PIG	Actin, cytoplasmic 1 OS=Sus scrofa GN=ACTB PE=2 SV=2	0	99	TVPIYEGYALPHAILR		cleaved H-T@N-term	1811.99	605.005	1811.99	605.005	3	10
90.36	73.33	Q6QAQ1	ACTB_PIG	Actin, cytoplasmic 1 OS=Sus scrofa GN=ACTB PE=2 SV=2	0	99	TVPIYEGYALPHAILR		cleaved H-T@N-term	1812	605.006	1811.99	605.005	3	10
90.36	73.33	Q6QAQ1	ACTB_PIG	Actin, cytoplasmic 1 OS=Sus scrofa GN=ACTB PE=2 SV=2	0	99	TVPIYEGYALPHAILR		cleaved H-T@N-term	1811.99	605.004	1811.99	605.005	3	10
90.36	73.33	Q6QAQ1	ACTB_PIG	Actin, cytoplasmic 1 OS=Sus scrofa GN=ACTB PE=2 SV=2	0	99	TVPIYEGYALPHAILR		cleaved H-T@N-term	1812	907.008	1811.99	907.004	2	9
90.36	73.33	Q6QAQ1	ACTB_PIG	Actin, cytoplasmic 1 OS=Sus scrofa GN=ACTB PE=2 SV=2	0	99	TVPIYEGYALPHAILR		cleaved H-T@N-term	1811.99	605.005	1811.99	605.005	3	10
90.36	73.33	Q6QAQ1	ACTB_PIG	Actin, cytoplasmic 1 OS=Sus scrofa GN=ACTB PE=2 SV=2	0	74.8	TVPIYEGYALPHAILR		cleaved H-T@N-term	1811.99	907.004	1811.99	907.004	2	7
90.36	73.33	Q6QAQ1	ACTB_PIG	Actin, cytoplasmic 1 OS=Sus scrofa GN=ACTB PE=2 SV=2	0	28.56	TVPIYEGYALPHAILR		cleaved H-T@N-term	1811.99	907.004	1811.99	907.004	2	6
90.36	73.33	Q6QAQ1	ACTB_PIG	Actin, cytoplasmic 1 OS=Sus scrofa GN=ACTB PE=2 SV=2	0	99	VALDFEQEMATAASSSSLEK		cleaved Y-V@N-term	2112.99	1057.5	2112.99	1057.5	2	19
90.36	73.33	Q6QAQ1	ACTB_PIG	Actin, cytoplasmic 1 OS=Sus scrofa GN=ACTB PE=2 SV=2	0	99	VALDFEQEMATAASSSSLEK		cleaved Y-V@N-term	2112.99	1057.5	2112.99	1057.5	2	13
90.36	73.33	Q6QAQ1	ACTB_PIG	Actin, cytoplasmic 1 OS=Sus scrofa GN=ACTB PE=2 SV=2	0	99	VALDFEQEMATAASSSSLEK		cleaved Y-V@N-term	2112.99	1057.5	2112.99	1057.5	2	13
90.36	73.33	Q6QAQ1	ACTB_PIG	Actin, cytoplasmic 1 OS=Sus scrofa GN=ACTB PE=2 SV=2	0	98.58	VALDFEQEMATAASSSSLEK		cleaved Y-V@N-term	2112.99	1057.5	2112.99	1057.5	2	15
90.36	73.33	Q6QAQ1	ACTB_PIG	Actin, cytoplasmic 1 OS=Sus scrofa GN=ACTB PE=2 SV=2	0	98.46	VALDFEQEMATAASSSSLEK		cleaved Y-V@N-term	2112.99	1057.5	2112.99	1057.5	2	14
90.36	73.33	Q6QAQ1	ACTB_PIG	Actin, cytoplasmic 1 OS=Sus scrofa GN=ACTB PE=2 SV=2	0	97.41	VALDFEQEMATAASSSSLEK		cleaved Y-V@N-term	2112.99	1057.5	2112.99	1057.5	2	10
90.36	73.33	Q6QAQ1	ACTB_PIG	Actin, cytoplasmic 1 OS=Sus scrofa GN=ACTB PE=2 SV=2	0	94.66	VALDFEQEMATAASSSSLEK		cleaved Y-V@N-term	2112.99	1057.5	2112.99	1057.5	2	9
90.36	73.33	Q6QAQ1	ACTB_PIG	Actin, cytoplasmic 1 OS=Sus scrofa GN=ACTB PE=2 SV=2	0	93.4	VALDFEQEMATAASSSSLEK		cleaved Y-V@N-term	2112.99	1057.5	2112.99	1057.5	2	9
90.36	73.33	Q6QAQ1	ACTB_PIG	Actin, cytoplasmic 1 OS=Sus scrofa GN=ACTB PE=2 SV=2	0	93.4	VALDFEQEMATAASSSSLEK		cleaved Y-V@N-term	2112.99	1057.5	2112.99	1057.5	2	10
90.36	73.33	Q6QAQ1	ACTB_PIG	Actin, cytoplasmic 1 OS=Sus scrofa GN=ACTB PE=2 SV=2	0	88.16	VALDFEQEMATAASSSSLEK	Carbamyl(M)@9	cleaved Y-V@N-term	2155.99	719.672	2155.99	719.672	3	15
90.36	73.33	Q6QAQ1	ACTB_PIG	Actin, cytoplasmic 1 OS=Sus scrofa GN=ACTB PE=2 SV=2	0	84.01	VALDFEQEMATAASSSSLEK		cleaved Y-V@N-term	2113	1057.51	2112.99	1057.5	2	8
90.36	73.33	Q6QAQ1	ACTB_PIG	Actin, cytoplasmic 1 OS=Sus scrofa GN=ACTB PE=2 SV=2	0	81.06	VALDFEQEMATAASSSSLEK		cleaved Y-V@N-term	2112.99	1057.5	2112.99	1057.5	2	9
90.36	73.33	Q6QAQ1	ACTB_PIG	Actin, cytoplasmic 1 OS=Sus scrofa GN=ACTB PE=2 SV=2	0	77.57	VALDFEQEMATAASSSSLEK		cleaved Y-V@N-term	2113	1057.51	2112.99	1057.5	2	7
90.36	73.33	Q6QAQ1	ACTB_PIG	Actin, cytoplasmic 1 OS=Sus scrofa GN=ACTB PE=2 SV=2	0	75.71	VALDFEQEMATAASSSSLEK	Carbamyl(M)@9	cleaved Y-V@N-term	2155.99	719.672	2155.99	719.672	3	14
90.36	73.33	Q6QAQ1	ACTB_PIG	Actin, cytoplasmic 1 OS=Sus scrofa GN=ACTB PE=2 SV=2	0	75.08	VALDFEQEMATAASSSSLEK	Carbamyl(M)@9	cleaved Y-V@N-term	2156	1079.01	2155.99	1079	2	14
90.36	73.33	Q6QAQ1	ACTB_PIG	Actin, cytoplasmic 1 OS=Sus scrofa GN=ACTB PE=2 SV=2	0	99	VAPEEHPVLLTEAPLNPK			1953.06	977.536	1953.06	977.536	2	20
90.36	73.33	Q6QAQ1	ACTB_PIG	Actin, cytoplasmic 1 OS=Sus scrofa GN=ACTB PE=2 SV=2	0	99	VAPEEHPVLLTEAPLNPK			1953.06	652.027	1953.06	652.026	3	23
90.36	73.33	Q6QAQ1	ACTB_PIG	Actin, cytoplasmic 1 OS=Sus scrofa GN=ACTB PE=2 SV=2	0	99	VAPEEHPVLLTEAPLNPK			1953.06	977.536	1953.06	977.536	2	24
90.36	73.33	Q6QAQ1	ACTB_PIG	Actin, cytoplasmic 1 OS=Sus scrofa GN=ACTB PE=2 SV=2	0	99	VAPEEHPVLLTEAPLNPK			1953.06	652.027	1953.06	652.026	3	24
90.36	73.33	Q6QAQ1	ACTB_PIG	Actin, cytoplasmic 1 OS=Sus scrofa GN=ACTB PE=2 SV=2	0	99	VAPEEHPVLLTEAPLNPK			1953.06	652.027	1953.06	652.026	3	20
90.36	73.33	Q6QAQ1	ACTB_PIG	Actin, cytoplasmic 1 OS=Sus scrofa GN=ACTB PE=2 SV=2	0	99	VAPEEHPVLLTEAPLNPK			1953.06	977.537	1953.06	977.536	2	22
90.36	73.33	Q6QAQ1	ACTB_PIG	Actin, cytoplasmic 1 OS=Sus scrofa GN=ACTB PE=2 SV=2	0	99	VAPEEHPVLLTEAPLNPK	Deamidated(N)@16		1954.06	652.361	1954.04	652.354	3	16
90.36	73.33	Q6QAQ1	ACTB_PIG	Actin, cytoplasmic 1 OS=Sus scrofa GN=ACTB PE=2 SV=2	0	99	VAPEEHPVLLTEAPLNPK			1953.06	977.537	1953.06	977.536	2	20
90.36	73.33	Q6QAQ1	ACTB_PIG	Actin, cytoplasmic 1 OS=Sus scrofa GN=ACTB PE=2 SV=2	0	99	VAPEEHPVLLTEAPLNPK			1953.05	489.271	1953.06	489.272	4	12
90.36	73.33	Q6QAQ1	ACTB_PIG	Actin, cytoplasmic 1 OS=Sus scrofa GN=ACTB PE=2 SV=2	0	99	VAPEEHPVLLTEAPLNPK			1953.06	977.536	1953.06	977.536	2	17
90.36	73.33	Q6QAQ1	ACTB_PIG	Actin, cytoplasmic 1 OS=Sus scrofa GN=ACTB PE=2 SV=2	0	99	VAPEEHPVLLTEAPLNPK			1953.06	652.026	1953.06	652.026	3	19
90.36	73.33	Q6QAQ1	ACTB_PIG	Actin, cytoplasmic 1 OS=Sus scrofa GN=ACTB PE=2 SV=2	0	99	VAPEEHPVLLTEAPLNPK			1953.06	652.026	1953.06	652.026	3	15
90.36	73.33	Q6QAQ1	ACTB_PIG	Actin, cytoplasmic 1 OS=Sus scrofa GN=ACTB PE=2 SV=2	0	99	VAPEEHPVLLTEAPLNPK			1953.06	652.026	1953.06	652.026	3	16
90.36	73.33	Q6QAQ1	ACTB_PIG	Actin, cytoplasmic 1 OS=Sus scrofa GN=ACTB PE=2 SV=2	0	99	VAPEEHPVLLTEAPLNPK			1953.06	977.536	1953.06	977.536	2	18
90.36	73.33	Q6QAQ1	ACTB_PIG	Actin, cytoplasmic 1 OS=Sus scrofa GN=ACTB PE=2 SV=2	0	99	VAPEEHPVLLTEAPLNPK			1953.06	652.028	1953.06	652.026	3	22
90.36	73.33	Q6QAQ1	ACTB_PIG	Actin, cytoplasmic 1 OS=Sus scrofa GN=ACTB PE=2 SV=2	0	99	VAPEEHPVLLTEAPLNPK	Deamidated(N)@16		1954.06	652.361	1954.04	652.354	3	15
90.36	73.33	Q6QAQ1	ACTB_PIG	Actin, cytoplasmic 1 OS=Sus scrofa GN=ACTB PE=2 SV=2	0	99	VAPEEHPVLLTEAPLNPK			1953.06	652.028	1953.06	652.026	3	20
90.36	73.33	Q6QAQ1	ACTB_PIG	Actin, cytoplasmic 1 OS=Sus scrofa GN=ACTB PE=2 SV=2	0	99	VAPEEHPVLLTEAPLNPK			1953.06	977.537	1953.06	977.536	2	15
90.36	73.33	Q6QAQ1	ACTB_PIG	Actin, cytoplasmic 1 OS=Sus scrofa GN=ACTB PE=2 SV=2	0	99	VAPEEHPVLLTEAPLNPK			1953.06	652.028	1953.06	652.026	3	20
90.36	73.33	Q6QAQ1	ACTB_PIG	Actin, cytoplasmic 1 OS=Sus scrofa GN=ACTB PE=2 SV=2	0	99	VAPEEHPVLLTEAPLNPK			1953.06	977.537	1953.06	977.536	2	19
90.36	73.33	Q6QAQ1	ACTB_PIG	Actin, cytoplasmic 1 OS=Sus scrofa GN=ACTB PE=2 SV=2	0	99	VAPEEHPVLLTEAPLNPK			1953.06	977.537	1953.06	977.536	2	21
90.36	73.33	Q6QAQ1	ACTB_PIG	Actin, cytoplasmic 1 OS=Sus scrofa GN=ACTB PE=2 SV=2	0	99	VAPEEHPVLLTEAPLNPK			1953.06	977.537	1953.06	977.536	2	20
90.36	73.33	Q6QAQ1	ACTB_PIG	Actin, cytoplasmic 1 OS=Sus scrofa GN=ACTB PE=2 SV=2	0	99	VAPEEHPVLLTEAPLNPK			1953.06	977.537	1953.06	977.536	2	22
90.36	73.33	Q6QAQ1	ACTB_PIG	Actin, cytoplasmic 1 OS=Sus scrofa GN=ACTB PE=2 SV=2	0	99	VAPEEHPVLLTEAPLNPK			1953.06	977.537	1953.06	977.536	2	21
90.36	73.33	Q6QAQ1	ACTB_PIG	Actin, cytoplasmic 1 OS=Sus scrofa GN=ACTB PE=2 SV=2	0	99	VAPEEHPVLLTEAPLNPK			1953.06	977.537	1953.06	977.536	2	21
90.36	73.33	Q6QAQ1	ACTB_PIG	Actin, cytoplasmic 1 OS=Sus scrofa GN=ACTB PE=2 SV=2	0	99	VAPEEHPVLLTEAPLNPK			1953.06	652.028	1953.06	652.026	3	19
90.36	73.33	Q6QAQ1	ACTB_PIG	Actin, cytoplasmic 1 OS=Sus scrofa GN=ACTB PE=2 SV=2	0	99	VAPEEHPVLLTEAPLNPK			1953.06	977.537	1953.06	977.536	2	18
90.36	73.33	Q6QAQ1	ACTB_PIG	Actin, cytoplasmic 1 OS=Sus scrofa GN=ACTB PE=2 SV=2	0	99	VAPEEHPVLLTEAPLNPK			1953.06	977.537	1953.06	977.536	2	16
90.36	73.33	Q6QAQ1	ACTB_PIG	Actin, cytoplasmic 1 OS=Sus scrofa GN=ACTB PE=2 SV=2	0	99	VAPEEHPVLLTEAPLNPK			1953.06	977.537	1953.06	977.536	2	14
90.36	73.33	Q6QAQ1	ACTB_PIG	Actin, cytoplasmic 1 OS=Sus scrofa GN=ACTB PE=2 SV=2	0	99	VAPEEHPVLLTEAPLNPK			1953.06	977.537	1953.06	977.536	2	13
90.36	73.33	Q6QAQ1	ACTB_PIG	Actin, cytoplasmic 1 OS=Sus scrofa GN=ACTB PE=2 SV=2	0	99	VAPEEHPVLLTEAPLNPK			1953.06	977.537	1953.06	977.536	2	14
90.36	73.33	Q6QAQ1	ACTB_PIG	Actin, cytoplasmic 1 OS=Sus scrofa GN=ACTB PE=2 SV=2	0	99	VAPEEHPVLLTEAPLNPK			1953.06	652.028	1953.06	652.026	3	18
90.36	73.33	Q6QAQ1	ACTB_PIG	Actin, cytoplasmic 1 OS=Sus scrofa GN=ACTB PE=2 SV=2	0	99	VAPEEHPVLLTEAPLNPK			1953.06	977.538	1953.06	977.536	2	23
90.36	73.33	Q6QAQ1	ACTB_PIG	Actin, cytoplasmic 1 OS=Sus scrofa GN=ACTB PE=2 SV=2	0	99	VAPEEHPVLLTEAPLNPK			1953.06	977.538	1953.06	977.536	2	20
90.36	73.33	Q6QAQ1	ACTB_PIG	Actin, cytoplasmic 1 OS=Sus scrofa GN=ACTB PE=2 SV=2	0	99	VAPEEHPVLLTEAPLNPK			1953.06	977.538	1953.06	977.536	2	21
90.36	73.33	Q6QAQ1	ACTB_PIG	Actin, cytoplasmic 1 OS=Sus scrofa GN=ACTB PE=2 SV=2	0	99	VAPEEHPVLLTEAPLNPK			1953.06	977.538	1953.06	977.536	2	20
90.36	73.33	Q6QAQ1	ACTB_PIG	Actin, cytoplasmic 1 OS=Sus scrofa GN=ACTB PE=2 SV=2	0	99	VAPEEHPVLLTEAPLNPK			1953.06	977.538	1953.06	977.536	2	24
90.36	73.33	Q6QAQ1	ACTB_PIG	Actin, cytoplasmic 1 OS=Sus scrofa GN=ACTB PE=2 SV=2	0	99	VAPEEHPVLLTEAPLNPK			1953.06	977.538	1953.06	977.536	2	22
90.36	73.33	Q6QAQ1	ACTB_PIG	Actin, cytoplasmic 1 OS=Sus scrofa GN=ACTB PE=2 SV=2	0	99	VAPEEHPVLLTEAPLNPK			1953.06	652.028	1953.06	652.026	3	19
90.36	73.33	Q6QAQ1	ACTB_PIG	Actin, cytoplasmic 1 OS=Sus scrofa GN=ACTB PE=2 SV=2	0	99	VAPEEHPVLLTEAPLNPK			1953.06	977.538	1953.06	977.536	2	23
90.36	73.33	Q6QAQ1	ACTB_PIG	Actin, cytoplasmic 1 OS=Sus scrofa GN=ACTB PE=2 SV=2	0	99	VAPEEHPVLLTEAPLNPK			1953.06	652.028	1953.06	652.026	3	16
90.36	73.33	Q6QAQ1	ACTB_PIG	Actin, cytoplasmic 1 OS=Sus scrofa GN=ACTB PE=2 SV=2	0	99	VAPEEHPVLLTEAPLNPK			1953.06	977.538	1953.06	977.536	2	13
90.36	73.33	Q6QAQ1	ACTB_PIG	Actin, cytoplasmic 1 OS=Sus scrofa GN=ACTB PE=2 SV=2	0	99	VAPEEHPVLLTEAPLNPK			1953.06	977.536	1953.06	977.536	2	22
90.36	73.33	Q6QAQ1	ACTB_PIG	Actin, cytoplasmic 1 OS=Sus scrofa GN=ACTB PE=2 SV=2	0	99	VAPEEHPVLLTEAPLNPK			1953.06	652.026	1953.06	652.026	3	23
90.36	73.33	Q6QAQ1	ACTB_PIG	Actin, cytoplasmic 1 OS=Sus scrofa GN=ACTB PE=2 SV=2	0	99	VAPEEHPVLLTEAPLNPK			1953.06	977.536	1953.06	977.536	2	21
90.36	73.33	Q6QAQ1	ACTB_PIG	Actin, cytoplasmic 1 OS=Sus scrofa GN=ACTB PE=2 SV=2	0	99	VAPEEHPVLLTEAPLNPK			1953.06	977.536	1953.06	977.536	2	21
90.36	73.33	Q6QAQ1	ACTB_PIG	Actin, cytoplasmic 1 OS=Sus scrofa GN=ACTB PE=2 SV=2	0	99	VAPEEHPVLLTEAPLNPK			1954.05	652.357	1953.06	652.026	3	14
90.36	73.33	Q6QAQ1	ACTB_PIG	Actin, cytoplasmic 1 OS=Sus scrofa GN=ACTB PE=2 SV=2	0	99	VAPEEHPVLLTEAPLNPK			1953.06	652.026	1953.06	652.026	3	19
90.36	73.33	Q6QAQ1	ACTB_PIG	Actin, cytoplasmic 1 OS=Sus scrofa GN=ACTB PE=2 SV=2	0	99	VAPEEHPVLLTEAPLNPK			1953.06	977.536	1953.06	977.536	2	18
90.36	73.33	Q6QAQ1	ACTB_PIG	Actin, cytoplasmic 1 OS=Sus scrofa GN=ACTB PE=2 SV=2	0	99	VAPEEHPVLLTEAPLNPK			1953.05	977.532	1953.06	977.536	2	11
90.36	73.33	Q6QAQ1	ACTB_PIG	Actin, cytoplasmic 1 OS=Sus scrofa GN=ACTB PE=2 SV=2	0	99	VAPEEHPVLLTEAPLNPK			1953.06	489.271	1953.06	489.272	4	10
90.36	73.33	Q6QAQ1	ACTB_PIG	Actin, cytoplasmic 1 OS=Sus scrofa GN=ACTB PE=2 SV=2	0	99	VAPEEHPVLLTEAPLNPK			1953.06	977.536	1953.06	977.536	2	17
90.36	73.33	Q6QAQ1	ACTB_PIG	Actin, cytoplasmic 1 OS=Sus scrofa GN=ACTB PE=2 SV=2	0	99	VAPEEHPVLLTEAPLNPK	Carbamyl@N-term; Methyl(E)@5		2010.08	1006.05	2010.08	1006.05	2	13
90.36	73.33	Q6QAQ1	ACTB_PIG	Actin, cytoplasmic 1 OS=Sus scrofa GN=ACTB PE=2 SV=2	0	99	VAPEEHPVLLTEAPLNPK			1953.06	652.028	1953.06	652.026	3	13
90.36	73.33	Q6QAQ1	ACTB_PIG	Actin, cytoplasmic 1 OS=Sus scrofa GN=ACTB PE=2 SV=2	0	99	VAPEEHPVLLTEAPLNPK	Carbamyl@N-term; Methyl(E)@5		2010.08	1006.05	2010.08	1006.05	2	13
90.36	73.33	Q6QAQ1	ACTB_PIG	Actin, cytoplasmic 1 OS=Sus scrofa GN=ACTB PE=2 SV=2	0	99	VAPEEHPVLLTEAPLNPK			1953.06	977.536	1953.06	977.536	2	12
90.36	73.33	Q6QAQ1	ACTB_PIG	Actin, cytoplasmic 1 OS=Sus scrofa GN=ACTB PE=2 SV=2	0	99	VAPEEHPVLLTEAPLNPK			1953.06	652.027	1953.06	652.026	3	10
90.36	73.33	Q6QAQ1	ACTB_PIG	Actin, cytoplasmic 1 OS=Sus scrofa GN=ACTB PE=2 SV=2	0	99	VAPEEHPVLLTEAPLNPK			1953.05	489.271	1953.06	489.272	4	13
90.36	73.33	Q6QAQ1	ACTB_PIG	Actin, cytoplasmic 1 OS=Sus scrofa GN=ACTB PE=2 SV=2	0	99	VAPEEHPVLLTEAPLNPK			1953.06	652.029	1953.06	652.026	3	12
90.36	73.33	Q6QAQ1	ACTB_PIG	Actin, cytoplasmic 1 OS=Sus scrofa GN=ACTB PE=2 SV=2	0	99	VAPEEHPVLLTEAPLNPK	Carbamyl@N-term; Methyl(E)@5		2010.08	1006.05	2010.08	1006.05	2	14
90.36	73.33	Q6QAQ1	ACTB_PIG	Actin, cytoplasmic 1 OS=Sus scrofa GN=ACTB PE=2 SV=2	0	99	VAPEEHPVLLTEAPLNPK	Carbamyl@N-term; Methyl(E)@5		2010.08	1006.05	2010.08	1006.05	2	15
90.36	73.33	Q6QAQ1	ACTB_PIG	Actin, cytoplasmic 1 OS=Sus scrofa GN=ACTB PE=2 SV=2	0	99	VAPEEHPVLLTEAPLNPK			1953.05	489.271	1953.06	489.272	4	11
90.36	73.33	Q6QAQ1	ACTB_PIG	Actin, cytoplasmic 1 OS=Sus scrofa GN=ACTB PE=2 SV=2	0	99	VAPEEHPVLLTEAPLNPK	Carbamyl@N-term; Methyl(E)@5		2010.08	1006.05	2010.08	1006.05	2	12
90.36	73.33	Q6QAQ1	ACTB_PIG	Actin, cytoplasmic 1 OS=Sus scrofa GN=ACTB PE=2 SV=2	0	99	VAPEEHPVLLTEAPLNPK	Methyl(N)@16; Carbamyl(K)@18		2010.08	671.033	2010.08	671.033	3	12
90.36	73.33	Q6QAQ1	ACTB_PIG	Actin, cytoplasmic 1 OS=Sus scrofa GN=ACTB PE=2 SV=2	0	98.47	VAPEEHPVLLTEAPLNPK			1953.05	652.024	1953.06	652.026	3	9
90.36	73.33	Q6QAQ1	ACTB_PIG	Actin, cytoplasmic 1 OS=Sus scrofa GN=ACTB PE=2 SV=2	0	98.01	VAPEEHPVLLTEAPLNPK	Carbamyl@N-term; Methyl(E)@5		2010.08	1006.05	2010.08	1006.05	2	15
90.36	73.33	Q6QAQ1	ACTB_PIG	Actin, cytoplasmic 1 OS=Sus scrofa GN=ACTB PE=2 SV=2	0	97.04	VAPEEHPVLLTEAPLNPK	Carbamyl@N-term; Methyl(H)@6		2010.08	1006.05	2010.08	1006.05	2	13
90.36	73.33	Q6QAQ1	ACTB_PIG	Actin, cytoplasmic 1 OS=Sus scrofa GN=ACTB PE=2 SV=2	0	96.92	VAPEEHPVLLTEAPLNPK			1953.06	977.536	1953.06	977.536	2	10
90.36	73.33	Q6QAQ1	ACTB_PIG	Actin, cytoplasmic 1 OS=Sus scrofa GN=ACTB PE=2 SV=2	0	96.74	VAPEEHPVLLTEAPLNPK	Carbamyl@N-term; Methyl(H)@6		2010.08	1006.05	2010.08	1006.05	2	14
90.36	73.33	Q6QAQ1	ACTB_PIG	Actin, cytoplasmic 1 OS=Sus scrofa GN=ACTB PE=2 SV=2	0	94.76	VAPEEHPVLLTEAPLNPK			1953.05	652.025	1953.06	652.026	3	6
90.36	73.33	Q6QAQ1	ACTB_PIG	Actin, cytoplasmic 1 OS=Sus scrofa GN=ACTB PE=2 SV=2	0	93.86	VAPEEHPVLLTEAPLNPK	Oxidation(P)@7		1969.01	657.345	1969.05	657.358	3	11
90.36	73.33	Q6QAQ1	ACTB_PIG	Actin, cytoplasmic 1 OS=Sus scrofa GN=ACTB PE=2 SV=2	0	93.53	VAPEEHPVLLTEAPLNPK			1953.05	652.025	1953.06	652.026	3	9
90.36	73.33	Q6QAQ1	ACTB_PIG	Actin, cytoplasmic 1 OS=Sus scrofa GN=ACTB PE=2 SV=2	0	93.02	VAPEEHPVLLTEAPLNPK	Carbamyl@N-term; Methyl(E)@5		2010.08	1006.05	2010.08	1006.05	2	11
90.36	73.33	Q6QAQ1	ACTB_PIG	Actin, cytoplasmic 1 OS=Sus scrofa GN=ACTB PE=2 SV=2	0	92.7	VAPEEHPVLLTEAPLNPK			1953.05	652.025	1953.06	652.026	3	10
90.36	73.33	Q6QAQ1	ACTB_PIG	Actin, cytoplasmic 1 OS=Sus scrofa GN=ACTB PE=2 SV=2	0	91.48	VAPEEHPVLLTEAPLNPK	Carbamyl@N-term; Methyl(H)@6		2010.08	671.033	2010.08	671.033	3	14
90.36	73.33	Q6QAQ1	ACTB_PIG	Actin, cytoplasmic 1 OS=Sus scrofa GN=ACTB PE=2 SV=2	0	89.13	VAPEEHPVLLTEAPLNPK			1954.05	652.356	1953.06	652.026	3	12
90.36	73.33	Q6QAQ1	ACTB_PIG	Actin, cytoplasmic 1 OS=Sus scrofa GN=ACTB PE=2 SV=2	0	85.33	VAPEEHPVLLTEAPLNPK			1953.04	652.022	1953.06	652.026	3	8
90.36	73.33	Q6QAQ1	ACTB_PIG	Actin, cytoplasmic 1 OS=Sus scrofa GN=ACTB PE=2 SV=2	0	84.28	VAPEEHPVLLTEAPLNPK			1953.05	652.025	1953.06	652.026	3	7
90.36	73.33	Q6QAQ1	ACTB_PIG	Actin, cytoplasmic 1 OS=Sus scrofa GN=ACTB PE=2 SV=2	0	78.39	VAPEEHPVLLTEAPLNPK	Carbamyl@N-term; Methyl(E)@5		2010.08	1006.04	2010.08	1006.05	2	11
90.36	73.33	Q6QAQ1	ACTB_PIG	Actin, cytoplasmic 1 OS=Sus scrofa GN=ACTB PE=2 SV=2	0	77.59	VAPEEHPVLLTEAPLNPK			1953.06	489.272	1953.06	489.272	4	7
90.36	73.33	Q6QAQ1	ACTB_PIG	Actin, cytoplasmic 1 OS=Sus scrofa GN=ACTB PE=2 SV=2	0	71.61	VAPEEHPVLLTEAPLNPK	Carbamyl@N-term; Methyl(E)@5		2010.08	1006.04	2010.08	1006.05	2	11
90.36	73.33	Q6QAQ1	ACTB_PIG	Actin, cytoplasmic 1 OS=Sus scrofa GN=ACTB PE=2 SV=2	0	71.06	VAPEEHPVLLTEAPLNPK	Deamidated(N)@16; Propionyl(K)@18		2010.08	671.034	2010.07	671.03	3	13
90.36	73.33	Q6QAQ1	ACTB_PIG	Actin, cytoplasmic 1 OS=Sus scrofa GN=ACTB PE=2 SV=2	0	69.79	VAPEEHPVLLTEAPLNPK	Carbamyl@N-term; Oxidation(P)@7		2012.06	1007.04	2012.06	1007.04	2	11
90.36	73.33	Q6QAQ1	ACTB_PIG	Actin, cytoplasmic 1 OS=Sus scrofa GN=ACTB PE=2 SV=2	0	66.12	VAPEEHPVLLTEAPLNPK	Carbamyl@N-term; Methyl(H)@6		2010.08	671.034	2010.08	671.033	3	13
90.36	73.33	Q6QAQ1	ACTB_PIG	Actin, cytoplasmic 1 OS=Sus scrofa GN=ACTB PE=2 SV=2	0	64.53	VAPEEHPVLLTEAPLNPK	Methyl(H)@6		1967.03	656.684	1967.07	656.698	3	11
90.36	73.33	Q6QAQ1	ACTB_PIG	Actin, cytoplasmic 1 OS=Sus scrofa GN=ACTB PE=2 SV=2	0	64.31	VAPEEHPVLLTEAPLNPK			1953.06	977.538	1953.06	977.536	2	7
90.36	73.33	Q6QAQ1	ACTB_PIG	Actin, cytoplasmic 1 OS=Sus scrofa GN=ACTB PE=2 SV=2	0	54.88	VAPEEHPVLLTEAPLNPK	Carbamyl@N-term; Methyl(H)@6		2010.08	1006.05	2010.08	1006.05	2	10
90.36	73.33	Q6QAQ1	ACTB_PIG	Actin, cytoplasmic 1 OS=Sus scrofa GN=ACTB PE=2 SV=2	0	48.35	VAPEEHPVLLTEAPLNPK			1953.06	652.026	1953.06	652.026	3	7
90.36	73.33	Q6QAQ1	ACTB_PIG	Actin, cytoplasmic 1 OS=Sus scrofa GN=ACTB PE=2 SV=2	0	48.33	VAPEEHPVLLTEAPLNPK			1953.04	977.528	1953.06	977.536	2	6
90.36	73.33	Q6QAQ1	ACTB_PIG	Actin, cytoplasmic 1 OS=Sus scrofa GN=ACTB PE=2 SV=2	0	46.86	VAPEEHPVLLTEAPLNPK			1953.06	652.027	1953.06	652.026	3	7
90.36	73.33	Q6QAQ1	ACTB_PIG	Actin, cytoplasmic 1 OS=Sus scrofa GN=ACTB PE=2 SV=2	0	46.57	VAPEEHPVLLTEAPLNPK	Carbamyl@N-term; Oxidation(P)@7		2012.06	1007.04	2012.06	1007.04	2	10
90.36	73.33	Q6QAQ1	ACTB_PIG	Actin, cytoplasmic 1 OS=Sus scrofa GN=ACTB PE=2 SV=2	0	41.05	VAPEEHPVLLTEAPLNPK	Oxidation(P)@7		1969.01	657.345	1969.05	657.358	3	6
90.36	73.33	Q6QAQ1	ACTB_PIG	Actin, cytoplasmic 1 OS=Sus scrofa GN=ACTB PE=2 SV=2	0	41.05	VAPEEHPVLLTEAPLNPK	Carbamyl@N-term; Oxidation(P)@7		2012.06	671.694	2012.06	671.693	3	11
90.36	73.33	Q6QAQ1	ACTB_PIG	Actin, cytoplasmic 1 OS=Sus scrofa GN=ACTB PE=2 SV=2	0	38	VAPEEHPVLLTEAPLNPK	Carbamyl@N-term; Oxidation(P)@7		2012.06	671.694	2012.06	671.693	3	11
90.36	73.33	Q6QAQ1	ACTB_PIG	Actin, cytoplasmic 1 OS=Sus scrofa GN=ACTB PE=2 SV=2	0	36.88	VAPEEHPVLLTEAPLNPK	Carbamyl@N-term; Oxidation(P)@7		2012.06	1007.04	2012.06	1007.04	2	11
90.36	73.33	Q6QAQ1	ACTB_PIG	Actin, cytoplasmic 1 OS=Sus scrofa GN=ACTB PE=2 SV=2	0	32.88	VAPEEHPVLLTEAPLNPK			1953.06	652.026	1953.06	652.026	3	6
90.36	73.33	Q6QAQ1	ACTB_PIG	Actin, cytoplasmic 1 OS=Sus scrofa GN=ACTB PE=2 SV=2	0	32.76	VAPEEHPVLLTEAPLNPK	Carbamyl@N-term; Oxidation(P)@7		2012.06	1007.04	2012.06	1007.04	2	14
90.36	73.33	Q6QAQ1	ACTB_PIG	Actin, cytoplasmic 1 OS=Sus scrofa GN=ACTB PE=2 SV=2	0	30.89	VAPEEHPVLLTEAPLNPK	Oxidation(P)@7		1969.02	657.347	1969.05	657.358	3	10
90.36	73.33	Q6QAQ1	ACTB_PIG	Actin, cytoplasmic 1 OS=Sus scrofa GN=ACTB PE=2 SV=2	0	30.89	VAPEEHPVLLTEAPLNPK	Oxidation(P)@7		1969.01	657.345	1969.05	657.358	3	9
90.36	73.33	Q6QAQ1	ACTB_PIG	Actin, cytoplasmic 1 OS=Sus scrofa GN=ACTB PE=2 SV=2	0	27.41	VAPEEHPVLLTEAPLNPK	Carbamyl@N-term; Oxidation(P)@7		2012.05	1007.03	2012.06	1007.04	2	9
90.36	73.33	Q6QAQ1	ACTB_PIG	Actin, cytoplasmic 1 OS=Sus scrofa GN=ACTB PE=2 SV=2	0	26.88	VAPEEHPVLLTEAPLNPK	Carbamyl@N-term; Oxidation(P)@3		2012.06	671.693	2012.06	671.693	3	9
90.36	73.33	Q6QAQ1	ACTB_PIG	Actin, cytoplasmic 1 OS=Sus scrofa GN=ACTB PE=2 SV=2	0	23.27	VAPEEHPVLLTEAPLNPK	Carbamyl@N-term; Oxidation(P)@7		2012.06	1007.03	2012.06	1007.04	2	11
90.36	73.33	Q6QAQ1	ACTB_PIG	Actin, cytoplasmic 1 OS=Sus scrofa GN=ACTB PE=2 SV=2	0	20.84	VAPEEHPVLLTEAPLNPK			1953.06	652.026	1953.06	652.026	3	6
90.36	73.33	Q6QAQ1	ACTB_PIG	Actin, cytoplasmic 1 OS=Sus scrofa GN=ACTB PE=2 SV=2	0	19.76	VAPEEHPVLLTEAPLNPK	Carbamyl@N-term; Oxidation(P)@7		2012.06	671.694	2012.06	671.693	3	8
90.36	73.33	Q6QAQ1	ACTB_PIG	Actin, cytoplasmic 1 OS=Sus scrofa GN=ACTB PE=2 SV=2	0	18.43	VAPEEHPVLLTEAPLNPK	Carboxymethyl@N-term		2011.07	671.365	2011.06	671.361	3	6
90.36	73.33	Q6QAQ1	ACTB_PIG	Actin, cytoplasmic 1 OS=Sus scrofa GN=ACTB PE=2 SV=2	0	50.82	VFPSIVGR		cleaved A-V@N-term; cleaved R-P@C-term	873.507	437.761	873.507	437.761	2	8
90.36	73.33	Q6QAQ1	ACTB_PIG	Actin, cytoplasmic 1 OS=Sus scrofa GN=ACTB PE=2 SV=2	0	43.92	VFPSIVGR		cleaved A-V@N-term; cleaved R-P@C-term	873.506	437.76	873.507	437.761	2	6
90.36	73.33	Q6QAQ1	ACTB_PIG	Actin, cytoplasmic 1 OS=Sus scrofa GN=ACTB PE=2 SV=2	0	37.55	VFPSIVGR		cleaved A-V@N-term; cleaved R-P@C-term	873.507	437.761	873.507	437.761	2	8
90.36	73.33	Q6QAQ1	ACTB_PIG	Actin, cytoplasmic 1 OS=Sus scrofa GN=ACTB PE=2 SV=2	0	78.4	VFPSIVGRPR	Lys-add@N-term	cleaved A-V@N-term	1254.72	419.248	1254.76	419.259	3	10
90.36	73.33	Q6QAQ1	ACTB_PIG	Actin, cytoplasmic 1 OS=Sus scrofa GN=ACTB PE=2 SV=2	0	93.52	VLSGGTTMYPGIADR	GlyGly(S)@3	cleaved T-V@N-term	1650.81	826.41	1650.8	826.409	2	15
90.36	73.33	Q6QAQ1	ACTB_PIG	Actin, cytoplasmic 1 OS=Sus scrofa GN=ACTB PE=2 SV=2	0	99	YELPDGQVITIGNER		cleaved S-Y@N-term	1702.85	852.433	1702.85	852.434	2	17
90.36	73.33	Q6QAQ1	ACTB_PIG	Actin, cytoplasmic 1 OS=Sus scrofa GN=ACTB PE=2 SV=2	0	99	YELPDGQVITIGNER		cleaved S-Y@N-term	1702.85	852.434	1702.85	852.434	2	10
90.36	73.33	Q6QAQ1	ACTB_PIG	Actin, cytoplasmic 1 OS=Sus scrofa GN=ACTB PE=2 SV=2	0	99	YELPDGQVITIGNER		cleaved S-Y@N-term	1702.85	852.434	1702.85	852.434	2	9
90.36	73.33	Q6QAQ1	ACTB_PIG	Actin, cytoplasmic 1 OS=Sus scrofa GN=ACTB PE=2 SV=2	0	98.86	YELPDGQVITIGNER		cleaved S-Y@N-term	1702.85	852.433	1702.85	852.434	2	16
90.36	73.33	Q6QAQ1	ACTB_PIG	Actin, cytoplasmic 1 OS=Sus scrofa GN=ACTB PE=2 SV=2	0	98.86	YELPDGQVITIGNER		cleaved S-Y@N-term	1702.85	852.433	1702.85	852.434	2	16
90.36	73.33	Q6QAQ1	ACTB_PIG	Actin, cytoplasmic 1 OS=Sus scrofa GN=ACTB PE=2 SV=2	0	98.86	YELPDGQVITIGNER		cleaved S-Y@N-term	1702.85	852.433	1702.85	852.434	2	14
90.36	73.33	Q6QAQ1	ACTB_PIG	Actin, cytoplasmic 1 OS=Sus scrofa GN=ACTB PE=2 SV=2	0	97.73	YELPDGQVITIGNER		cleaved S-Y@N-term	1702.85	852.432	1702.85	852.434	2	12
90.36	73.33	Q6QAQ1	ACTB_PIG	Actin, cytoplasmic 1 OS=Sus scrofa GN=ACTB PE=2 SV=2	0	90.56	YELPDGQVITIGNER		cleaved S-Y@N-term	1702.85	852.432	1702.85	852.434	2	9
90.36	73.33	Q6QAQ1	ACTB_PIG	Actin, cytoplasmic 1 OS=Sus scrofa GN=ACTB PE=2 SV=2	0	84.62	YELPDGQVITIGNER		cleaved S-Y@N-term	1702.85	852.432	1702.85	852.434	2	9
90.36	73.33	Q6QAQ1	ACTB_PIG	Actin, cytoplasmic 1 OS=Sus scrofa GN=ACTB PE=2 SV=2	0	82.8	YELPDGQVITIGNER		cleaved S-Y@N-term	1702.85	852.433	1702.85	852.434	2	9
90.36	73.33	Q6QAQ1	ACTB_PIG	Actin, cytoplasmic 1 OS=Sus scrofa GN=ACTB PE=2 SV=2	0	78.8	YELPDGQVITIGNER		cleaved S-Y@N-term	1702.85	852.434	1702.85	852.434	2	8
90.36	73.33	Q6QAQ1	ACTB_PIG	Actin, cytoplasmic 1 OS=Sus scrofa GN=ACTB PE=2 SV=2	0	72.81	YELPDGQVITIGNER		cleaved S-Y@N-term	1702.85	852.431	1702.85	852.434	2	7
90.36	73.33	Q6QAQ1	ACTB_PIG	Actin, cytoplasmic 1 OS=Sus scrofa GN=ACTB PE=2 SV=2	0	56.6	YELPDGQVITIGNER		cleaved S-Y@N-term	1702.85	852.434	1702.85	852.434	2	7
90.36	73.33	Q6QAQ1	ACTB_PIG	Actin, cytoplasmic 1 OS=Sus scrofa GN=ACTB PE=2 SV=2	0	56.38	YELPDGQVITIGNER		cleaved S-Y@N-term	1702.88	852.445	1702.85	852.434	2	9
90.36	73.33	Q6QAQ1	ACTB_PIG	Actin, cytoplasmic 1 OS=Sus scrofa GN=ACTB PE=2 SV=2	0	32.93	YELPDGQVITIGNER		cleaved S-Y@N-term	1702.85	852.434	1702.85	852.434	2	7
90.36	73.33	Q6QAQ1	ACTB_PIG	Actin, cytoplasmic 1 OS=Sus scrofa GN=ACTB PE=2 SV=2	0	99	YPIEHGIVTNWDDMEK	Methyl(H)@5		1959.9	654.308	1959.9	654.308	3	19
90.36	73.33	Q6QAQ1	ACTB_PIG	Actin, cytoplasmic 1 OS=Sus scrofa GN=ACTB PE=2 SV=2	0	99	YPIEHGIVTNWDDMEK	Methyl(H)@5		1959.91	654.31	1959.9	654.308	3	16
90.36	73.33	Q6QAQ1	ACTB_PIG	Actin, cytoplasmic 1 OS=Sus scrofa GN=ACTB PE=2 SV=2	0	99	YPIEHGIVTNWDDMEK	Methyl(H)@5; Oxidation(M)@14		1975.9	659.64	1975.9	659.64	3	16
90.36	73.33	Q6QAQ1	ACTB_PIG	Actin, cytoplasmic 1 OS=Sus scrofa GN=ACTB PE=2 SV=2	0	99	YPIEHGIVTNWDDMEK	Methyl(H)@5		1959.91	980.961	1959.9	980.959	2	24
90.36	73.33	Q6QAQ1	ACTB_PIG	Actin, cytoplasmic 1 OS=Sus scrofa GN=ACTB PE=2 SV=2	0	99	YPIEHGIVTNWDDMEK	Methyl(H)@5		1959.91	654.309	1959.9	654.308	3	20
90.36	73.33	Q6QAQ1	ACTB_PIG	Actin, cytoplasmic 1 OS=Sus scrofa GN=ACTB PE=2 SV=2	0	99	YPIEHGIVTNWDDMEK	Methyl(H)@5		1959.91	980.961	1959.9	980.959	2	21
90.36	73.33	Q6QAQ1	ACTB_PIG	Actin, cytoplasmic 1 OS=Sus scrofa GN=ACTB PE=2 SV=2	0	99	YPIEHGIVTNWDDMEK	Methyl(H)@5		1959.9	980.957	1959.9	980.959	2	22
90.36	73.33	Q6QAQ1	ACTB_PIG	Actin, cytoplasmic 1 OS=Sus scrofa GN=ACTB PE=2 SV=2	0	99	YPIEHGIVTNWDDMEK	Methyl(H)@5		1959.9	654.308	1959.9	654.308	3	23
90.36	73.33	Q6QAQ1	ACTB_PIG	Actin, cytoplasmic 1 OS=Sus scrofa GN=ACTB PE=2 SV=2	0	99	YPIEHGIVTNWDDMEK	Methyl(H)@5		1959.91	654.309	1959.9	654.308	3	16
90.36	73.33	Q6QAQ1	ACTB_PIG	Actin, cytoplasmic 1 OS=Sus scrofa GN=ACTB PE=2 SV=2	0	99	YPIEHGIVTNWDDMEK	Methyl(H)@5		1959.9	980.957	1959.9	980.959	2	16
90.36	73.33	Q6QAQ1	ACTB_PIG	Actin, cytoplasmic 1 OS=Sus scrofa GN=ACTB PE=2 SV=2	0	99	YPIEHGIVTNWDDMEK	Methyl(H)@5		1959.9	654.308	1959.9	654.308	3	13
90.36	73.33	Q6QAQ1	ACTB_PIG	Actin, cytoplasmic 1 OS=Sus scrofa GN=ACTB PE=2 SV=2	0	99	YPIEHGIVTNWDDMEK	Methyl(E)@4; Deamidated(N)@10		1960.91	654.643	1960.89	654.636	3	16
90.36	73.33	Q6QAQ1	ACTB_PIG	Actin, cytoplasmic 1 OS=Sus scrofa GN=ACTB PE=2 SV=2	0	99	YPIEHGIVTNWDDMEK	Methyl(H)@5		1959.9	654.308	1959.9	654.308	3	19
90.36	73.33	Q6QAQ1	ACTB_PIG	Actin, cytoplasmic 1 OS=Sus scrofa GN=ACTB PE=2 SV=2	0	98.86	YPIEHGIVTNWDDMEK	Methyl(H)@5		1959.9	654.308	1959.9	654.308	3	17
90.36	73.33	Q6QAQ1	ACTB_PIG	Actin, cytoplasmic 1 OS=Sus scrofa GN=ACTB PE=2 SV=2	0	94.72	YPIEHGIVTNWDDMEK	Methyl(H)@5		1959.9	654.308	1959.9	654.308	3	12
90.36	73.33	Q6QAQ1	ACTB_PIG	Actin, cytoplasmic 1 OS=Sus scrofa GN=ACTB PE=2 SV=2	0	92.41	YPIEHGIVTNWDDMEK	Methyl(H)@5		1959.91	980.961	1959.9	980.959	2	10
90.36	73.33	Q6QAQ1	ACTB_PIG	Actin, cytoplasmic 1 OS=Sus scrofa GN=ACTB PE=2 SV=2	0	89.36	YPIEHGIVTNWDDMEK	Methyl(H)@5		1959.9	654.308	1959.9	654.308	3	12
90.36	73.33	Q6QAQ1	ACTB_PIG	Actin, cytoplasmic 1 OS=Sus scrofa GN=ACTB PE=2 SV=2	0	56.6	YPIEHGIVTNWDDMEK	Methyl(E)@4; Dethiomethyl(M)@14		1911.9	478.983	1911.9	478.982	4	12
90.36	73.33	Q6QAQ1	ACTB_PIG	Actin, cytoplasmic 1 OS=Sus scrofa GN=ACTB PE=2 SV=2	0	50.45	YPIEHGIVTNWDDMEK	Delta:H(4)C(2)(H)@5		1973.92	658.981	1973.92	658.98	3	12
90.36	73.33	Q6QAQ1	ACTB_PIG	Actin, cytoplasmic 1 OS=Sus scrofa GN=ACTB PE=2 SV=2	0	49.98	YPIEHGIVTNWDDMEK	Methyl(H)@5		1959.9	980.957	1959.9	980.959	2	7
90.36	73.33	Q6QAQ1	ACTB_PIG	Actin, cytoplasmic 1 OS=Sus scrofa GN=ACTB PE=2 SV=2	0	41	YPIEHGIVTNWDDMEK	Methyl(E)@4; Dethiomethyl(M)@14		1911.9	478.983	1911.9	478.982	4	12
90.36	73.33	Q6QAQ1	ACTB_PIG	Actin, cytoplasmic 1 OS=Sus scrofa GN=ACTB PE=2 SV=2	0	40.03	YPIEHGIVTNWDDMEK	Methyl(H)@5; Oxidation(M)@14		1975.9	659.64	1975.9	659.64	3	7
90.36	73.33	Q6QAQ1	ACTB_PIG	Actin, cytoplasmic 1 OS=Sus scrofa GN=ACTB PE=2 SV=2	0	22.19	YPIEHGIVTNWDDMEK	Delta:H(4)C(2)(H)@5		1973.92	658.981	1973.92	658.98	3	10
102.55	76.13	P68137	ACTS_PIG	Actin, alpha skeletal muscle OS=Sus scrofa GN=ACTA1 PE=3 SV=1	2	99	AGFAGDDAPR			975.44	488.727	975.441	488.728	2	10
102.55	76.13	P68137	ACTS_PIG	Actin, alpha skeletal muscle OS=Sus scrofa GN=ACTA1 PE=3 SV=1	2	99	APEEHPTLLTEAPLNPK		cleaved V-A@N-term	1855.97	619.664	1855.97	619.663	3	18
102.55	76.13	P68137	ACTS_PIG	Actin, alpha skeletal muscle OS=Sus scrofa GN=ACTA1 PE=3 SV=1	2	99	AVFPSIVGR		cleaved R-P@C-term	944.542	473.279	944.544	473.279	2	8
102.55	76.13	P68137	ACTS_PIG	Actin, alpha skeletal muscle OS=Sus scrofa GN=ACTA1 PE=3 SV=1	2	99	AVFPSIVGRPR			1197.7	400.24	1197.7	400.24	3	12
102.55	76.13	P68137	ACTS_PIG	Actin, alpha skeletal muscle OS=Sus scrofa GN=ACTA1 PE=3 SV=1	2	99	DFENEMATAASSSSLEK		cleaved L-D@N-term	1815.79	908.901	1815.78	908.899	2	14
102.55	76.13	P68137	ACTS_PIG	Actin, alpha skeletal muscle OS=Sus scrofa GN=ACTA1 PE=3 SV=1	2	99	DGQVITIGNER		cleaved P-D@N-term	1200.61	601.312	1200.61	601.312	2	13
102.55	76.13	P68137	ACTS_PIG	Actin, alpha skeletal muscle OS=Sus scrofa GN=ACTA1 PE=3 SV=1	2	99	DLTDYLMK			997.478	499.746	997.479	499.747	2	8
102.55	76.13	P68137	ACTS_PIG	Actin, alpha skeletal muscle OS=Sus scrofa GN=ACTA1 PE=3 SV=1	2	99	DSYVGDEAQS		cleaved S-K@C-term	1069.42	535.717	1069.42	535.717	2	13
102.55	76.13	P68137	ACTS_PIG	Actin, alpha skeletal muscle OS=Sus scrofa GN=ACTA1 PE=3 SV=1	2	99	DSYVGDEAQSK			1197.51	599.764	1197.52	599.765	2	7
102.55	76.13	P68137	ACTS_PIG	Actin, alpha skeletal muscle OS=Sus scrofa GN=ACTA1 PE=3 SV=1	2	99	EEHPTLLTEAPLNPK		cleaved P-E@N-term	1687.88	563.633	1687.88	563.633	3	15
102.55	76.13	P68137	ACTS_PIG	Actin, alpha skeletal muscle OS=Sus scrofa GN=ACTA1 PE=3 SV=1	2	99	EHPTLLTEAPLNPK		cleaved E-E@N-term	1558.83	780.424	1558.84	780.425	2	17
102.55	76.13	P68137	ACTS_PIG	Actin, alpha skeletal muscle OS=Sus scrofa GN=ACTA1 PE=3 SV=1	2	99	EITALAPSTMK			1160.61	581.313	1160.61	581.313	2	15
102.55	76.13	P68137	ACTS_PIG	Actin, alpha skeletal muscle OS=Sus scrofa GN=ACTA1 PE=3 SV=1	2	99	ELPDGQVITIGNER		cleaved Y-E@N-term	1539.79	770.902	1539.79	770.902	2	18
102.55	76.13	P68137	ACTS_PIG	Actin, alpha skeletal muscle OS=Sus scrofa GN=ACTA1 PE=3 SV=1	2	99	FRCPETLFQPSFIGMESAGIHETTYNSIMK	Carboxymethyl(C)@3	missed R-C@2	3491.64	873.917	3491.62	873.912	4	11
102.55	76.13	P68137	ACTS_PIG	Actin, alpha skeletal muscle OS=Sus scrofa GN=ACTA1 PE=3 SV=1	2	99	GFAGDDAPR		cleaved A-G@N-term	904.404	453.209	904.404	453.209	2	9
102.55	76.13	P68137	ACTS_PIG	Actin, alpha skeletal muscle OS=Sus scrofa GN=ACTA1 PE=3 SV=1	2	99	GIITNWDDMEK		cleaved H-G@N-term	1320.61	661.31	1320.6	661.308	2	11
102.55	76.13	P68137	ACTS_PIG	Actin, alpha skeletal muscle OS=Sus scrofa GN=ACTA1 PE=3 SV=1	2	99	GYSFVTTAER			1129.54	565.778	1129.54	565.777	2	15
102.55	76.13	P68137	ACTS_PIG	Actin, alpha skeletal muscle OS=Sus scrofa GN=ACTA1 PE=3 SV=1	2	99	HPTLLTEAPLNPK		cleaved E-H@N-term	1429.79	715.902	1429.79	715.904	2	14
102.55	76.13	P68137	ACTS_PIG	Actin, alpha skeletal muscle OS=Sus scrofa GN=ACTA1 PE=3 SV=1	2	99	HQGVMVGMGQ		cleaved Q-K@C-term	1042.47	522.241	1042.47	522.242	2	10
102.55	76.13	P68137	ACTS_PIG	Actin, alpha skeletal muscle OS=Sus scrofa GN=ACTA1 PE=3 SV=1	2	99	HQGVMVGMGQK			1170.56	586.288	1170.56	586.289	2	17
102.55	76.13	P68137	ACTS_PIG	Actin, alpha skeletal muscle OS=Sus scrofa GN=ACTA1 PE=3 SV=1	2	99	IIAPPER			794.465	398.24	794.465	398.24	2	7
102.55	76.13	P68137	ACTS_PIG	Actin, alpha skeletal muscle OS=Sus scrofa GN=ACTA1 PE=3 SV=1	2	99	IWHHTFYNEL		cleaved L-R@C-term	1358.64	680.328	1358.64	680.328	2	14
102.55	76.13	P68137	ACTS_PIG	Actin, alpha skeletal muscle OS=Sus scrofa GN=ACTA1 PE=3 SV=1	2	99	IWHHTFYNELR			1514.74	505.922	1514.74	505.921	3	17
102.55	76.13	P68137	ACTS_PIG	Actin, alpha skeletal muscle OS=Sus scrofa GN=ACTA1 PE=3 SV=1	2	99	KDLYANNVMSGGTTMYPGIADR	Dehydrated(S)@10; Oxidation(M)@15	missed K-D@1	2371.15	791.39	2371.09	791.372	3	18
102.55	76.13	P68137	ACTS_PIG	Actin, alpha skeletal muscle OS=Sus scrofa GN=ACTA1 PE=3 SV=1	2	99	LCYVALDFENEMATAASSSSLEK	Carboxymethyl(C)@2		2536.15	846.391	2536.14	846.386	3	7
102.55	76.13	P68137	ACTS_PIG	Actin, alpha skeletal muscle OS=Sus scrofa GN=ACTA1 PE=3 SV=1	2	99	LLTEAPLNPK		cleaved T-L@N-term	1094.63	548.324	1094.63	548.324	2	12
102.55	76.13	P68137	ACTS_PIG	Actin, alpha skeletal muscle OS=Sus scrofa GN=ACTA1 PE=3 SV=1	2	99	LPDGQVITIGNER		cleaved E-L@N-term	1410.75	706.38	1410.75	706.381	2	14
102.55	76.13	P68137	ACTS_PIG	Actin, alpha skeletal muscle OS=Sus scrofa GN=ACTA1 PE=3 SV=1	2	99	LRVAPEEHPTLLTEAPLNPK		cleaved E-L@N-term; missed R-V@2	2224.22	557.062	2224.22	557.063	4	17
102.55	76.13	P68137	ACTS_PIG	Actin, alpha skeletal muscle OS=Sus scrofa GN=ACTA1 PE=3 SV=1	2	99	MTQIMFETFNVPAMYVAIQAVLSLYASGR	GlyGly(T)@8		3364.69	842.178	3364.67	842.174	4	10
102.55	76.13	P68137	ACTS_PIG	Actin, alpha skeletal muscle OS=Sus scrofa GN=ACTA1 PE=3 SV=1	2	99	PEEHPTLLTEAPLNPK		cleaved A-P@N-term	1784.93	893.471	1784.93	893.473	2	13
102.55	76.13	P68137	ACTS_PIG	Actin, alpha skeletal muscle OS=Sus scrofa GN=ACTA1 PE=3 SV=1	2	99	PIEHGIITNWDDMEK	Methyl(H)@4	cleaved Y-P@N-term	1810.86	604.627	1810.86	604.626	3	16
102.55	76.13	P68137	ACTS_PIG	Actin, alpha skeletal muscle OS=Sus scrofa GN=ACTA1 PE=3 SV=1	2	99	PTLLTEAPLNPK		cleaved H-P@N-term	1292.73	647.374	1292.73	647.374	2	12
102.55	76.13	P68137	ACTS_PIG	Actin, alpha skeletal muscle OS=Sus scrofa GN=ACTA1 PE=3 SV=1	2	99	QEYDEAGPSIVH		cleaved H-R@C-term	1343.6	672.807	1343.6	672.807	2	14
102.55	76.13	P68137	ACTS_PIG	Actin, alpha skeletal muscle OS=Sus scrofa GN=ACTA1 PE=3 SV=1	2	99	QEYDEAGPSIVHR	Gln->pyro-Glu@N-term		1482.67	742.344	1482.67	742.344	2	16
102.55	76.13	P68137	ACTS_PIG	Actin, alpha skeletal muscle OS=Sus scrofa GN=ACTA1 PE=3 SV=1	2	99	RVAPEEHPTLLTEAPLNPK		cleaved L-R@N-term; missed R-V@1	2111.14	704.719	2111.14	704.72	3	20
102.55	76.13	P68137	ACTS_PIG	Actin, alpha skeletal muscle OS=Sus scrofa GN=ACTA1 PE=3 SV=1	2	99	SAGIHETTYNSIMK		cleaved E-S@N-term	1550.74	776.376	1550.74	776.377	2	11
102.55	76.13	P68137	ACTS_PIG	Actin, alpha skeletal muscle OS=Sus scrofa GN=ACTA1 PE=3 SV=1	2	99	SYELPDGQVITIGNER	Dehydrated(D)@6		1771.87	886.943	1771.87	886.944	2	17
102.55	76.13	P68137	ACTS_PIG	Actin, alpha skeletal muscle OS=Sus scrofa GN=ACTA1 PE=3 SV=1	2	99	TTGIVLDSGDGVTH		cleaved H-N@C-term	1370.67	686.341	1370.67	686.341	2	18
102.55	76.13	P68137	ACTS_PIG	Actin, alpha skeletal muscle OS=Sus scrofa GN=ACTA1 PE=3 SV=1	2	99	TTGIVLDSGDGVTHNVPIYEGY		cleaved Y-A@C-term	2306.1	1154.06	2306.11	1154.06	2	16
102.55	76.13	P68137	ACTS_PIG	Actin, alpha skeletal muscle OS=Sus scrofa GN=ACTA1 PE=3 SV=1	2	99	TTGIVLDSGDGVTHNVPIYEGYALPH		cleaved H-A@C-term	2724.34	909.121	2724.34	909.12	3	14
102.55	76.13	P68137	ACTS_PIG	Actin, alpha skeletal muscle OS=Sus scrofa GN=ACTA1 PE=3 SV=1	2	99	TTGIVLDSGDGVTHNVPIYEGYALPHAIMR			3195.6	799.908	3195.6	799.908	4	13
102.55	76.13	P68137	ACTS_PIG	Actin, alpha skeletal muscle OS=Sus scrofa GN=ACTA1 PE=3 SV=1	2	99	VALDFENEMATAASSSSLEK		cleaved Y-V@N-term	2098.97	1050.49	2098.97	1050.49	2	13
102.55	76.13	P68137	ACTS_PIG	Actin, alpha skeletal muscle OS=Sus scrofa GN=ACTA1 PE=3 SV=1	2	99	VAPEEHPTLLTEAPLNPK			1955.04	652.686	1955.04	652.686	3	13
102.55	76.13	P68137	ACTS_PIG	Actin, alpha skeletal muscle OS=Sus scrofa GN=ACTA1 PE=3 SV=1	2	99	YELPDGQVITIGNER		cleaved S-Y@N-term	1702.85	852.433	1702.85	852.434	2	17
102.55	76.13	P68137	ACTS_PIG	Actin, alpha skeletal muscle OS=Sus scrofa GN=ACTA1 PE=3 SV=1	2	99	YPIEHGIITNWDDMEK	Methyl(H)@5; Oxidation(M)@14		1989.92	664.313	1989.91	664.312	3	17
102.55	76.13	P68137	ACTS_PIG	Actin, alpha skeletal muscle OS=Sus scrofa GN=ACTA1 PE=3 SV=1	2	99	YSFVTTAER		cleaved G-Y@N-term	1072.52	537.266	1072.52	537.267	2	11
102.55	76.13	P68137	ACTS_PIG	Actin, alpha skeletal muscle OS=Sus scrofa GN=ACTA1 PE=3 SV=1	1.79588	99	AVFPSIVGRP		cleaved P-R@C-term	1041.6	521.806	1041.6	521.806	2	11
102.55	76.13	P68137	ACTS_PIG	Actin, alpha skeletal muscle OS=Sus scrofa GN=ACTA1 PE=3 SV=1	1.56864	99	VAPEEHPTLLT		cleaved T-E@C-term	1205.63	603.822	1205.63	603.822	2	11
102.55	76.13	P68137	ACTS_PIG	Actin, alpha skeletal muscle OS=Sus scrofa GN=ACTA1 PE=3 SV=1	1.33724	99	VAPEEHPTLL		cleaved L-T@C-term	1104.58	553.298	1104.58	553.298	2	12
102.55	76.13	P68137	ACTS_PIG	Actin, alpha skeletal muscle OS=Sus scrofa GN=ACTA1 PE=3 SV=1	1.27572	99	EITALAPSTM		cleaved M-K@C-term	1032.52	517.266	1032.52	517.265	2	10
102.55	76.13	P68137	ACTS_PIG	Actin, alpha skeletal muscle OS=Sus scrofa GN=ACTA1 PE=3 SV=1	0.829738	99	VAPEEHPTLLTE		cleaved E-A@C-term	1334.67	668.342	1334.67	668.343	2	13
102.55	76.13	P68137	ACTS_PIG	Actin, alpha skeletal muscle OS=Sus scrofa GN=ACTA1 PE=3 SV=1	0.489455	85.01	SGGTTMYPGIADR		cleaved M-S@N-term	1324.61	663.315	1324.61	663.311	2	7
102.55	76.13	P68137	ACTS_PIG	Actin, alpha skeletal muscle OS=Sus scrofa GN=ACTA1 PE=3 SV=1	0.420216	98.87	TTGIVLDSGDGVTHNVPIYEGYALPHA		cleaved A-I@C-term	2795.38	932.8	2795.38	932.799	3	14
102.55	76.13	P68137	ACTS_PIG	Actin, alpha skeletal muscle OS=Sus scrofa GN=ACTA1 PE=3 SV=1	0.357535	99	AGFAGDDAPRAVFPSIVGR	Deamidated(R)@10	cleaved R-P@C-term; missed R-A@10	1902.96	952.486	1902.96	952.487	2	14
102.55	76.13	P68137	ACTS_PIG	Actin, alpha skeletal muscle OS=Sus scrofa GN=ACTA1 PE=3 SV=1	0.354578	99	FAGDDAPR		cleaved G-F@N-term	847.383	424.699	847.382	424.698	2	9
102.55	76.13	P68137	ACTS_PIG	Actin, alpha skeletal muscle OS=Sus scrofa GN=ACTA1 PE=3 SV=1	0.294136	97.45	VAPEEHPTLLTEA		cleaved A-P@C-term	1405.71	703.861	1405.71	703.862	2	12
102.55	76.13	P68137	ACTS_PIG	Actin, alpha skeletal muscle OS=Sus scrofa GN=ACTA1 PE=3 SV=1	0.240332	97.47	SYELPDGQVITIGNERF		cleaved F-R@C-term; missed R-F@16	1936.95	969.484	1936.95	969.484	2	12
102.55	76.13	P68137	ACTS_PIG	Actin, alpha skeletal muscle OS=Sus scrofa GN=ACTA1 PE=3 SV=1	0.20621	95.22	ENEMATAASSSSLEK		cleaved F-E@N-term	1553.69	777.854	1553.69	777.851	2	8
102.55	76.13	P68137	ACTS_PIG	Actin, alpha skeletal muscle OS=Sus scrofa GN=ACTA1 PE=3 SV=1	0.191114	95.35	FPSIVGR		cleaved V-F@N-term; cleaved R-P@C-term	774.439	388.227	774.439	388.227	2	8
102.55	76.13	P68137	ACTS_PIG	Actin, alpha skeletal muscle OS=Sus scrofa GN=ACTA1 PE=3 SV=1	0.161781	97.87	ALDFENEMATAASSSSLEK		cleaved V-A@N-term	1999.9	1000.96	1999.9	1000.96	2	15
102.55	76.13	P68137	ACTS_PIG	Actin, alpha skeletal muscle OS=Sus scrofa GN=ACTA1 PE=3 SV=1	0.159894	95.73	DGQVITIGNERF		cleaved P-D@N-term; cleaved F-R@C-term; missed R-F@11	1347.68	674.847	1347.68	674.846	2	11
102.55	76.13	P68137	ACTS_PIG	Actin, alpha skeletal muscle OS=Sus scrofa GN=ACTA1 PE=3 SV=1	0.0958256	98.42	NVPIYEGYALPH		cleaved H-N@N-term; cleaved H-A@C-term	1371.68	686.848	1371.68	686.848	2	12
102.55	76.13	P68137	ACTS_PIG	Actin, alpha skeletal muscle OS=Sus scrofa GN=ACTA1 PE=3 SV=1	0.093665	94.37	FIGMESAGIHETTYNSIMK		cleaved S-F@N-term	2127.99	710.338	2128	710.34	3	13
102.55	76.13	P68137	ACTS_PIG	Actin, alpha skeletal muscle OS=Sus scrofa GN=ACTA1 PE=3 SV=1	0.0888424	89.18	SYELPDGQVITI		cleaved I-G@C-term	1333.68	667.846	1333.68	667.846	2	7
102.55	76.13	P68137	ACTS_PIG	Actin, alpha skeletal muscle OS=Sus scrofa GN=ACTA1 PE=3 SV=1	0.0660068	87.7	VAPEEHPTLLTEAPLN		cleaved N-P@C-term	1729.89	865.95	1729.89	865.952	2	10
102.55	76.13	P68137	ACTS_PIG	Actin, alpha skeletal muscle OS=Sus scrofa GN=ACTA1 PE=3 SV=1	0.0589858	99	IITNWDDMEKIWHHTFYNELRVAPEEHPTLLTEAPLNPK		cleaved G-I@N-term; missed K-I@10; missed R-V@21	4684.31	781.726	4697.34	783.897	6	11
102.55	76.13	P68137	ACTS_PIG	Actin, alpha skeletal muscle OS=Sus scrofa GN=ACTA1 PE=3 SV=1	0.0525663	85.5	TLLTEAPLNPK		cleaved P-T@N-term	1195.68	598.846	1195.68	598.848	2	11
102.55	76.13	P68137	ACTS_PIG	Actin, alpha skeletal muscle OS=Sus scrofa GN=ACTA1 PE=3 SV=1	0.0520764	87.74	YPIEHGIITN		cleaved N-W@C-term	1155.59	578.803	1155.59	578.803	2	11
102.55	76.13	P68137	ACTS_PIG	Actin, alpha skeletal muscle OS=Sus scrofa GN=ACTA1 PE=3 SV=1	0.0496351	96.21	IEHGIITNWDDMEK		cleaved P-I@N-term	1699.78	850.9	1699.79	850.901	2	10
102.55	76.13	P68137	ACTS_PIG	Actin, alpha skeletal muscle OS=Sus scrofa GN=ACTA1 PE=3 SV=1	0.0443122	86.37	LDFENEMATAASSSSLEK		cleaved A-L@N-term	1928.87	965.44	1928.87	965.441	2	9
102.55	76.13	P68137	ACTS_PIG	Actin, alpha skeletal muscle OS=Sus scrofa GN=ACTA1 PE=3 SV=1	0.0433514	91.01	TTGIVLDSGDGVTHNVPIYE		cleaved E-G@C-term	2086.02	1044.02	2086.02	1044.02	2	11
102.55	76.13	P68137	ACTS_PIG	Actin, alpha skeletal muscle OS=Sus scrofa GN=ACTA1 PE=3 SV=1	0.0259491	71.5	FPSIVGRPR		cleaved V-F@N-term	1027.59	514.803	1027.59	514.804	2	9
102.55	76.13	P68137	ACTS_PIG	Actin, alpha skeletal muscle OS=Sus scrofa GN=ACTA1 PE=3 SV=1	0.0241089	99	EYDEAGPSIVH		cleaved Q-E@N-term; cleaved H-R@C-term	1215.54	608.778	1215.54	608.778	2	12
102.55	76.13	P68137	ACTS_PIG	Actin, alpha skeletal muscle OS=Sus scrofa GN=ACTA1 PE=3 SV=1	0.0168249	57.52	PSIVGRPR		cleaved F-P@N-term	880.522	441.268	880.524	441.269	2	6
102.55	76.13	P68137	ACTS_PIG	Actin, alpha skeletal muscle OS=Sus scrofa GN=ACTA1 PE=3 SV=1	0.015923	76.26	FIGMESAGIHETTYN		cleaved S-F@N-term; cleaved N-S@C-term	1668.74	835.378	1668.75	835.38	2	8
102.55	76.13	P68137	ACTS_PIG	Actin, alpha skeletal muscle OS=Sus scrofa GN=ACTA1 PE=3 SV=1	0.0141246	75.55	AVFPSIVG		cleaved G-R@C-term	788.442	395.228	788.443	395.229	2	8
102.55	76.13	P68137	ACTS_PIG	Actin, alpha skeletal muscle OS=Sus scrofa GN=ACTA1 PE=3 SV=1	0.0132283	57.04	RVAPEEHPTLLTEA		cleaved L-R@N-term; cleaved A-P@C-term; missed R-V@1	1561.81	781.911	1561.81	781.912	2	9
102.55	76.13	P68137	ACTS_PIG	Actin, alpha skeletal muscle OS=Sus scrofa GN=ACTA1 PE=3 SV=1	0.0127808	71.52	EITALAPST		cleaved T-M@C-term	901.477	451.745	901.476	451.745	2	7
102.55	76.13	P68137	ACTS_PIG	Actin, alpha skeletal muscle OS=Sus scrofa GN=ACTA1 PE=3 SV=1	0.0123337	71.08	ELPDGQVITIGNE		cleaved Y-E@N-term; cleaved E-R@C-term	1383.69	692.851	1383.69	692.851	2	9
102.55	76.13	P68137	ACTS_PIG	Actin, alpha skeletal muscle OS=Sus scrofa GN=ACTA1 PE=3 SV=1	0.0118872	64.66	TTGIVLDSGDGVTHNVPIYEGYALPHAI		cleaved I-M@C-term	2908.46	970.495	2908.46	970.494	3	10
102.55	76.13	P68137	ACTS_PIG	Actin, alpha skeletal muscle OS=Sus scrofa GN=ACTA1 PE=3 SV=1	0.011441	50.82	VFPSIVGR		cleaved A-V@N-term; cleaved R-P@C-term	873.507	437.761	873.507	437.761	2	8
102.55	76.13	P68137	ACTS_PIG	Actin, alpha skeletal muscle OS=Sus scrofa GN=ACTA1 PE=3 SV=1	0.0109954	99	DLYANNVMSGGTTMYPGIADR	Dehydrated(S)@9		2227.06	1114.54	2227	1114.51	2	15
102.55	76.13	P68137	ACTS_PIG	Actin, alpha skeletal muscle OS=Sus scrofa GN=ACTA1 PE=3 SV=1	0.00966115	43.91	SFVTTAER		cleaved Y-S@N-term	909.459	455.737	909.456	455.735	2	5
102.55	76.13	P68137	ACTS_PIG	Actin, alpha skeletal muscle OS=Sus scrofa GN=ACTA1 PE=3 SV=1	0.00833099	53.37	CPETLFQPSFIGMESAGIHET	Carboxymethyl(C)@1	cleaved T-T@C-term	2351.07	784.696	2351.04	784.689	3	6
102.55	76.13	P68137	ACTS_PIG	Actin, alpha skeletal muscle OS=Sus scrofa GN=ACTA1 PE=3 SV=1	0.00568285	58.06	EYDEAGPSIVHR		cleaved Q-E@N-term	1371.65	458.223	1371.64	458.221	3	10
102.55	76.13	P68137	ACTS_PIG	Actin, alpha skeletal muscle OS=Sus scrofa GN=ACTA1 PE=3 SV=1	0.00524306	64.72	QEYDEAGPSIV		cleaved V-H@C-term	1206.54	604.279	1206.54	604.278	2	9
102.55	76.13	P68137	ACTS_PIG	Actin, alpha skeletal muscle OS=Sus scrofa GN=ACTA1 PE=3 SV=1	0.00480371	44.94	SYELPDGQVITIGNE		cleaved E-R@C-term	1633.78	817.899	1633.78	817.899	2	9
102.55	76.13	P68137	ACTS_PIG	Actin, alpha skeletal muscle OS=Sus scrofa GN=ACTA1 PE=3 SV=1	0.00436481	66.45	KQEYDEAGPSIVHR		cleaved T-K@N-term; missed K-Q@1	1627.79	814.901	1627.8	814.905	2	8
102.55	76.13	P68137	ACTS_PIG	Actin, alpha skeletal muscle OS=Sus scrofa GN=ACTA1 PE=3 SV=1	0.00348833	76.89	EITALAPS		cleaved S-T@C-term	800.427	401.221	800.428	401.221	2	10
102.55	76.13	P68137	ACTS_PIG	Actin, alpha skeletal muscle OS=Sus scrofa GN=ACTA1 PE=3 SV=1	0.00261362	79.2	HHTFYNELR		cleaved W-H@N-term	1215.61	406.212	1215.58	406.2	3	7
102.55	76.13	P68137	ACTS_PIG	Actin, alpha skeletal muscle OS=Sus scrofa GN=ACTA1 PE=3 SV=1	0.00174066	24.49	DIDIRKDLYANNVM		cleaved C-D@N-term; cleaved M-S@C-term; missed R-K@5; missed K-D@6	1678.86	840.437	1678.83	840.425	2	6
102.55	76.13	P68137	ACTS_PIG	Actin, alpha skeletal muscle OS=Sus scrofa GN=ACTA1 PE=3 SV=1	0.000869459	15.66	APEEHPTLL		cleaved V-A@N-term; cleaved L-T@C-term	1005.52	503.767	1005.51	503.764	2	7
102.55	76.13	P68137	ACTS_PIG	Actin, alpha skeletal muscle OS=Sus scrofa GN=ACTA1 PE=3 SV=1	0.000869459	90.49	CPETLFQPSFIGMESAGIHETTYNSIMK	Carboxymethyl(C)@1		3187.47	1063.5	3188.45	1063.82	3	13
102.55	76.13	P68137	ACTS_PIG	Actin, alpha skeletal muscle OS=Sus scrofa GN=ACTA1 PE=3 SV=1	0.000434512	99	ANNVMSGGTTMYPGIADR	Dehydrated(S)@6	cleaved Y-A@N-term	1835.88	918.95	1835.83	918.922	2	14
102.55	76.13	P68137	ACTS_PIG	Actin, alpha skeletal muscle OS=Sus scrofa GN=ACTA1 PE=3 SV=1	0.000434512	17.97	ANNVMSGGTTMYPGIADRMQKEI	Deamidated(Q)@20	cleaved Y-A@N-term; cleaved I-T@C-term; missed R-M@18; missed K-E@21	2484.22	829.079	2484.14	829.056	3	7
102.55	76.13	P68137	ACTS_PIG	Actin, alpha skeletal muscle OS=Sus scrofa GN=ACTA1 PE=3 SV=1	0.000434512	43.49	CDIDIR	Carboxymethyl(C)@1; Dehydrated(D)@2		773.34	387.678	773.338	387.676	2	7
102.55	76.13	P68137	ACTS_PIG	Actin, alpha skeletal muscle OS=Sus scrofa GN=ACTA1 PE=3 SV=1	0.000434512	92.16	EKLCYVALDFENEMATAASSSSLEK	Carboxymethyl(C)@4	missed K-L@2	2792.29	931.771	2793.27	932.098	3	12
102.55	76.13	P68137	ACTS_PIG	Actin, alpha skeletal muscle OS=Sus scrofa GN=ACTA1 PE=3 SV=1	0.000434512	95.32	LEKSYELPDGQVITIGNER		cleaved S-L@N-term; missed K-S@3	2166.09	1084.05	2160.11	1081.06	2	13
102.55	76.13	P68137	ACTS_PIG	Actin, alpha skeletal muscle OS=Sus scrofa GN=ACTA1 PE=3 SV=1	0	99	AGFAGDDAPR			975.44	488.727	975.441	488.728	2	12
102.55	76.13	P68137	ACTS_PIG	Actin, alpha skeletal muscle OS=Sus scrofa GN=ACTA1 PE=3 SV=1	0	99	AGFAGDDAPR			975.441	488.728	975.441	488.728	2	11
102.55	76.13	P68137	ACTS_PIG	Actin, alpha skeletal muscle OS=Sus scrofa GN=ACTA1 PE=3 SV=1	0	99	AGFAGDDAPR			975.442	488.728	975.441	488.728	2	10
102.55	76.13	P68137	ACTS_PIG	Actin, alpha skeletal muscle OS=Sus scrofa GN=ACTA1 PE=3 SV=1	0	99	AGFAGDDAPR			975.442	488.728	975.441	488.728	2	15
102.55	76.13	P68137	ACTS_PIG	Actin, alpha skeletal muscle OS=Sus scrofa GN=ACTA1 PE=3 SV=1	0	99	AGFAGDDAPR			975.442	488.728	975.441	488.728	2	12
102.55	76.13	P68137	ACTS_PIG	Actin, alpha skeletal muscle OS=Sus scrofa GN=ACTA1 PE=3 SV=1	0	99	AGFAGDDAPR			975.442	488.728	975.441	488.728	2	11
102.55	76.13	P68137	ACTS_PIG	Actin, alpha skeletal muscle OS=Sus scrofa GN=ACTA1 PE=3 SV=1	0	99	AGFAGDDAPR			975.443	488.729	975.441	488.728	2	9
102.55	76.13	P68137	ACTS_PIG	Actin, alpha skeletal muscle OS=Sus scrofa GN=ACTA1 PE=3 SV=1	0	99	AGFAGDDAPR			975.44	488.727	975.441	488.728	2	7
102.55	76.13	P68137	ACTS_PIG	Actin, alpha skeletal muscle OS=Sus scrofa GN=ACTA1 PE=3 SV=1	0	99	AGFAGDDAPR			975.439	488.727	975.441	488.728	2	9
102.55	76.13	P68137	ACTS_PIG	Actin, alpha skeletal muscle OS=Sus scrofa GN=ACTA1 PE=3 SV=1	0	99	AGFAGDDAPR			975.441	488.728	975.441	488.728	2	11
102.55	76.13	P68137	ACTS_PIG	Actin, alpha skeletal muscle OS=Sus scrofa GN=ACTA1 PE=3 SV=1	0	99	AGFAGDDAPR			975.441	488.728	975.441	488.728	2	13
102.55	76.13	P68137	ACTS_PIG	Actin, alpha skeletal muscle OS=Sus scrofa GN=ACTA1 PE=3 SV=1	0	99	AGFAGDDAPR			975.44	488.728	975.441	488.728	2	13
102.55	76.13	P68137	ACTS_PIG	Actin, alpha skeletal muscle OS=Sus scrofa GN=ACTA1 PE=3 SV=1	0	99	AGFAGDDAPR			975.441	488.728	975.441	488.728	2	16
102.55	76.13	P68137	ACTS_PIG	Actin, alpha skeletal muscle OS=Sus scrofa GN=ACTA1 PE=3 SV=1	0	99	AGFAGDDAPR			975.441	488.728	975.441	488.728	2	16
102.55	76.13	P68137	ACTS_PIG	Actin, alpha skeletal muscle OS=Sus scrofa GN=ACTA1 PE=3 SV=1	0	99	AGFAGDDAPR			975.441	488.728	975.441	488.728	2	14
102.55	76.13	P68137	ACTS_PIG	Actin, alpha skeletal muscle OS=Sus scrofa GN=ACTA1 PE=3 SV=1	0	99	AGFAGDDAPR			975.441	488.728	975.441	488.728	2	13
102.55	76.13	P68137	ACTS_PIG	Actin, alpha skeletal muscle OS=Sus scrofa GN=ACTA1 PE=3 SV=1	0	99	AGFAGDDAPR			975.441	488.728	975.441	488.728	2	12
102.55	76.13	P68137	ACTS_PIG	Actin, alpha skeletal muscle OS=Sus scrofa GN=ACTA1 PE=3 SV=1	0	99	AGFAGDDAPR			975.441	488.728	975.441	488.728	2	13
102.55	76.13	P68137	ACTS_PIG	Actin, alpha skeletal muscle OS=Sus scrofa GN=ACTA1 PE=3 SV=1	0	99	AGFAGDDAPR			975.441	488.728	975.441	488.728	2	13
102.55	76.13	P68137	ACTS_PIG	Actin, alpha skeletal muscle OS=Sus scrofa GN=ACTA1 PE=3 SV=1	0	99	AGFAGDDAPR			975.441	488.728	975.441	488.728	2	10
102.55	76.13	P68137	ACTS_PIG	Actin, alpha skeletal muscle OS=Sus scrofa GN=ACTA1 PE=3 SV=1	0	99	AGFAGDDAPR			975.441	488.728	975.441	488.728	2	10
102.55	76.13	P68137	ACTS_PIG	Actin, alpha skeletal muscle OS=Sus scrofa GN=ACTA1 PE=3 SV=1	0	99	AGFAGDDAPR			975.439	488.727	975.441	488.728	2	11
102.55	76.13	P68137	ACTS_PIG	Actin, alpha skeletal muscle OS=Sus scrofa GN=ACTA1 PE=3 SV=1	0	99	AGFAGDDAPR			975.441	488.728	975.441	488.728	2	13
102.55	76.13	P68137	ACTS_PIG	Actin, alpha skeletal muscle OS=Sus scrofa GN=ACTA1 PE=3 SV=1	0	99	AGFAGDDAPR			975.441	488.728	975.441	488.728	2	12
102.55	76.13	P68137	ACTS_PIG	Actin, alpha skeletal muscle OS=Sus scrofa GN=ACTA1 PE=3 SV=1	0	99	AGFAGDDAPR			975.441	488.728	975.441	488.728	2	7
102.55	76.13	P68137	ACTS_PIG	Actin, alpha skeletal muscle OS=Sus scrofa GN=ACTA1 PE=3 SV=1	0	99	AGFAGDDAPR			975.442	488.728	975.441	488.728	2	11
102.55	76.13	P68137	ACTS_PIG	Actin, alpha skeletal muscle OS=Sus scrofa GN=ACTA1 PE=3 SV=1	0	99	AGFAGDDAPR			975.44	488.727	975.441	488.728	2	12
102.55	76.13	P68137	ACTS_PIG	Actin, alpha skeletal muscle OS=Sus scrofa GN=ACTA1 PE=3 SV=1	0	99	AGFAGDDAPR			975.44	488.727	975.441	488.728	2	9
102.55	76.13	P68137	ACTS_PIG	Actin, alpha skeletal muscle OS=Sus scrofa GN=ACTA1 PE=3 SV=1	0	99	AGFAGDDAPR			975.441	488.728	975.441	488.728	2	11
102.55	76.13	P68137	ACTS_PIG	Actin, alpha skeletal muscle OS=Sus scrofa GN=ACTA1 PE=3 SV=1	0	99	AGFAGDDAPR			975.441	488.728	975.441	488.728	2	12
102.55	76.13	P68137	ACTS_PIG	Actin, alpha skeletal muscle OS=Sus scrofa GN=ACTA1 PE=3 SV=1	0	99	AGFAGDDAPR			975.441	488.728	975.441	488.728	2	13
102.55	76.13	P68137	ACTS_PIG	Actin, alpha skeletal muscle OS=Sus scrofa GN=ACTA1 PE=3 SV=1	0	99	AGFAGDDAPR			975.441	488.728	975.441	488.728	2	11
102.55	76.13	P68137	ACTS_PIG	Actin, alpha skeletal muscle OS=Sus scrofa GN=ACTA1 PE=3 SV=1	0	99	AGFAGDDAPR			975.441	488.728	975.441	488.728	2	9
102.55	76.13	P68137	ACTS_PIG	Actin, alpha skeletal muscle OS=Sus scrofa GN=ACTA1 PE=3 SV=1	0	99	AGFAGDDAPR			975.44	488.727	975.441	488.728	2	10
102.55	76.13	P68137	ACTS_PIG	Actin, alpha skeletal muscle OS=Sus scrofa GN=ACTA1 PE=3 SV=1	0	99	AGFAGDDAPR			975.44	488.727	975.441	488.728	2	9
102.55	76.13	P68137	ACTS_PIG	Actin, alpha skeletal muscle OS=Sus scrofa GN=ACTA1 PE=3 SV=1	0	99	AGFAGDDAPR			975.441	488.728	975.441	488.728	2	14
102.55	76.13	P68137	ACTS_PIG	Actin, alpha skeletal muscle OS=Sus scrofa GN=ACTA1 PE=3 SV=1	0	99	AGFAGDDAPR			975.441	488.728	975.441	488.728	2	12
102.55	76.13	P68137	ACTS_PIG	Actin, alpha skeletal muscle OS=Sus scrofa GN=ACTA1 PE=3 SV=1	0	99	AGFAGDDAPR			975.441	488.728	975.441	488.728	2	10
102.55	76.13	P68137	ACTS_PIG	Actin, alpha skeletal muscle OS=Sus scrofa GN=ACTA1 PE=3 SV=1	0	99	AGFAGDDAPR			975.44	488.727	975.441	488.728	2	10
102.55	76.13	P68137	ACTS_PIG	Actin, alpha skeletal muscle OS=Sus scrofa GN=ACTA1 PE=3 SV=1	0	99	AGFAGDDAPR			975.442	488.728	975.441	488.728	2	8
102.55	76.13	P68137	ACTS_PIG	Actin, alpha skeletal muscle OS=Sus scrofa GN=ACTA1 PE=3 SV=1	0	99	AGFAGDDAPR			975.441	488.728	975.441	488.728	2	8
102.55	76.13	P68137	ACTS_PIG	Actin, alpha skeletal muscle OS=Sus scrofa GN=ACTA1 PE=3 SV=1	0	99	AGFAGDDAPR			975.438	488.726	975.441	488.728	2	9
102.55	76.13	P68137	ACTS_PIG	Actin, alpha skeletal muscle OS=Sus scrofa GN=ACTA1 PE=3 SV=1	0	99	AGFAGDDAPR			975.444	488.729	975.441	488.728	2	8
102.55	76.13	P68137	ACTS_PIG	Actin, alpha skeletal muscle OS=Sus scrofa GN=ACTA1 PE=3 SV=1	0	99	AGFAGDDAPR			975.439	488.727	975.441	488.728	2	11
102.55	76.13	P68137	ACTS_PIG	Actin, alpha skeletal muscle OS=Sus scrofa GN=ACTA1 PE=3 SV=1	0	99	AGFAGDDAPR			975.439	488.727	975.441	488.728	2	9
102.55	76.13	P68137	ACTS_PIG	Actin, alpha skeletal muscle OS=Sus scrofa GN=ACTA1 PE=3 SV=1	0	99	AGFAGDDAPR			975.448	488.731	975.441	488.728	2	8
102.55	76.13	P68137	ACTS_PIG	Actin, alpha skeletal muscle OS=Sus scrofa GN=ACTA1 PE=3 SV=1	0	98.99	AGFAGDDAPR			975.441	488.728	975.441	488.728	2	7
102.55	76.13	P68137	ACTS_PIG	Actin, alpha skeletal muscle OS=Sus scrofa GN=ACTA1 PE=3 SV=1	0	98.83	AGFAGDDAPR			975.441	488.728	975.441	488.728	2	10
102.55	76.13	P68137	ACTS_PIG	Actin, alpha skeletal muscle OS=Sus scrofa GN=ACTA1 PE=3 SV=1	0	98.82	AGFAGDDAPR			975.441	488.728	975.441	488.728	2	6
102.55	76.13	P68137	ACTS_PIG	Actin, alpha skeletal muscle OS=Sus scrofa GN=ACTA1 PE=3 SV=1	0	98.47	AGFAGDDAPR			975.44	488.728	975.441	488.728	2	7
102.55	76.13	P68137	ACTS_PIG	Actin, alpha skeletal muscle OS=Sus scrofa GN=ACTA1 PE=3 SV=1	0	97.27	AGFAGDDAPR			975.44	488.727	975.441	488.728	2	7
102.55	76.13	P68137	ACTS_PIG	Actin, alpha skeletal muscle OS=Sus scrofa GN=ACTA1 PE=3 SV=1	0	85.13	AGFAGDDAPR			975.442	488.728	975.441	488.728	2	6
102.55	76.13	P68137	ACTS_PIG	Actin, alpha skeletal muscle OS=Sus scrofa GN=ACTA1 PE=3 SV=1	0	73.01	AGFAGDDAPR			975.441	488.728	975.441	488.728	2	6
102.55	76.13	P68137	ACTS_PIG	Actin, alpha skeletal muscle OS=Sus scrofa GN=ACTA1 PE=3 SV=1	0	35.85	AGFAGDDAPR			975.44	488.727	975.441	488.728	2	5
102.55	76.13	P68137	ACTS_PIG	Actin, alpha skeletal muscle OS=Sus scrofa GN=ACTA1 PE=3 SV=1	0	30.05	AGFAGDDAPR			975.439	488.727	975.441	488.728	2	6
102.55	76.13	P68137	ACTS_PIG	Actin, alpha skeletal muscle OS=Sus scrofa GN=ACTA1 PE=3 SV=1	0	17.6	AGFAGDDAPR			975.438	488.726	975.441	488.728	2	4
102.55	76.13	P68137	ACTS_PIG	Actin, alpha skeletal muscle OS=Sus scrofa GN=ACTA1 PE=3 SV=1	0	99	AGFAGDDAPRAVFPSIVGR	Deamidated(R)@10	cleaved R-P@C-term; missed R-A@10	1902.96	952.486	1902.96	952.487	2	15
102.55	76.13	P68137	ACTS_PIG	Actin, alpha skeletal muscle OS=Sus scrofa GN=ACTA1 PE=3 SV=1	0	99	AGFAGDDAPRAVFPSIVGR	Deamidated(R)@10	cleaved R-P@C-term; missed R-A@10	1902.96	952.487	1902.96	952.487	2	9
102.55	76.13	P68137	ACTS_PIG	Actin, alpha skeletal muscle OS=Sus scrofa GN=ACTA1 PE=3 SV=1	0	97.23	AGFAGDDAPRAVFPSIVGR	Deamidated(R)@10	cleaved R-P@C-term; missed R-A@10	1902.96	635.327	1902.96	635.327	3	10
102.55	76.13	P68137	ACTS_PIG	Actin, alpha skeletal muscle OS=Sus scrofa GN=ACTA1 PE=3 SV=1	0	87.4	AGFAGDDAPRAVFPSIVGR	Deamidated(R)@10	cleaved R-P@C-term; missed R-A@10	1902.96	952.486	1902.96	952.487	2	9
102.55	76.13	P68137	ACTS_PIG	Actin, alpha skeletal muscle OS=Sus scrofa GN=ACTA1 PE=3 SV=1	0	79.43	AGFAGDDAPRAVFPSIVGR	Deamidated(R)@10	cleaved R-P@C-term; missed R-A@10	1902.96	952.486	1902.96	952.487	2	9
102.55	76.13	P68137	ACTS_PIG	Actin, alpha skeletal muscle OS=Sus scrofa GN=ACTA1 PE=3 SV=1	0	79.43	AGFAGDDAPRAVFPSIVGR	Deamidated(R)@10	cleaved R-P@C-term; missed R-A@10	1902.96	952.486	1902.96	952.487	2	10
102.55	76.13	P68137	ACTS_PIG	Actin, alpha skeletal muscle OS=Sus scrofa GN=ACTA1 PE=3 SV=1	0	66.93	AGFAGDDAPRAVFPSIVGR	Deamidated(R)@10	cleaved R-P@C-term; missed R-A@10	1902.96	952.486	1902.96	952.487	2	8
102.55	76.13	P68137	ACTS_PIG	Actin, alpha skeletal muscle OS=Sus scrofa GN=ACTA1 PE=3 SV=1	0	61.46	AGFAGDDAPRAVFPSIVGR	Deamidated(R)@10	cleaved R-P@C-term; missed R-A@10	1902.96	635.327	1902.96	635.327	3	7
102.55	76.13	P68137	ACTS_PIG	Actin, alpha skeletal muscle OS=Sus scrofa GN=ACTA1 PE=3 SV=1	0	60.98	AGFAGDDAPRAVFPSIVGR	Deamidated(R)@10	cleaved R-P@C-term; missed R-A@10	1902.96	952.485	1902.96	952.487	2	8
102.55	76.13	P68137	ACTS_PIG	Actin, alpha skeletal muscle OS=Sus scrofa GN=ACTA1 PE=3 SV=1	0	97.08	ALDFENEMATAASSSSLEK		cleaved V-A@N-term	1999.92	1000.97	1999.9	1000.96	2	14
102.55	76.13	P68137	ACTS_PIG	Actin, alpha skeletal muscle OS=Sus scrofa GN=ACTA1 PE=3 SV=1	0	96.48	ALDFENEMATAASSSSLEK		cleaved V-A@N-term	1999.9	1000.96	1999.9	1000.96	2	13
102.55	76.13	P68137	ACTS_PIG	Actin, alpha skeletal muscle OS=Sus scrofa GN=ACTA1 PE=3 SV=1	0	99	ANNVMSGGTTMYPGIADR	Dehydrated(S)@6	cleaved Y-A@N-term	1835.89	918.951	1835.83	918.922	2	17
102.55	76.13	P68137	ACTS_PIG	Actin, alpha skeletal muscle OS=Sus scrofa GN=ACTA1 PE=3 SV=1	0	89.39	ANNVMSGGTTMYPGIADR	Dehydrated(S)@6	cleaved Y-A@N-term	1835.89	918.951	1835.83	918.922	2	12
102.55	76.13	P68137	ACTS_PIG	Actin, alpha skeletal muscle OS=Sus scrofa GN=ACTA1 PE=3 SV=1	0	69.45	ANNVMSGGTTMYPGIADR	Dehydrated(S)@6	cleaved Y-A@N-term	1835.88	918.949	1835.83	918.922	2	11
102.55	76.13	P68137	ACTS_PIG	Actin, alpha skeletal muscle OS=Sus scrofa GN=ACTA1 PE=3 SV=1	0	99	APEEHPTLLTEAPLNPK		cleaved V-A@N-term	1855.97	619.664	1855.97	619.663	3	21
102.55	76.13	P68137	ACTS_PIG	Actin, alpha skeletal muscle OS=Sus scrofa GN=ACTA1 PE=3 SV=1	0	99	APEEHPTLLTEAPLNPK	Arg-add@N-term	cleaved V-A@N-term	2012.06	671.693	2012.07	671.697	3	20
102.55	76.13	P68137	ACTS_PIG	Actin, alpha skeletal muscle OS=Sus scrofa GN=ACTA1 PE=3 SV=1	0	99	APEEHPTLLTEAPLNPK		cleaved V-A@N-term	1855.97	619.664	1855.97	619.663	3	15
102.55	76.13	P68137	ACTS_PIG	Actin, alpha skeletal muscle OS=Sus scrofa GN=ACTA1 PE=3 SV=1	0	99	APEEHPTLLTEAPLNPK		cleaved V-A@N-term	1855.97	928.992	1855.97	928.991	2	17
102.55	76.13	P68137	ACTS_PIG	Actin, alpha skeletal muscle OS=Sus scrofa GN=ACTA1 PE=3 SV=1	0	99	APEEHPTLLTEAPLNPK		cleaved V-A@N-term	1855.97	619.664	1855.97	619.663	3	18
102.55	76.13	P68137	ACTS_PIG	Actin, alpha skeletal muscle OS=Sus scrofa GN=ACTA1 PE=3 SV=1	0	99	APEEHPTLLTEAPLNPK		cleaved V-A@N-term	1855.97	619.664	1855.97	619.663	3	17
102.55	76.13	P68137	ACTS_PIG	Actin, alpha skeletal muscle OS=Sus scrofa GN=ACTA1 PE=3 SV=1	0	99	APEEHPTLLTEAPLNPK	Arg-add@N-term	cleaved V-A@N-term	2012.06	671.693	2012.07	671.697	3	20
102.55	76.13	P68137	ACTS_PIG	Actin, alpha skeletal muscle OS=Sus scrofa GN=ACTA1 PE=3 SV=1	0	99	APEEHPTLLTEAPLNPK	Arg-add@N-term	cleaved V-A@N-term	2012.06	671.693	2012.07	671.697	3	17
102.55	76.13	P68137	ACTS_PIG	Actin, alpha skeletal muscle OS=Sus scrofa GN=ACTA1 PE=3 SV=1	0	99	APEEHPTLLTEAPLNPK	Arg-add@N-term	cleaved V-A@N-term	2012.06	671.693	2012.07	671.697	3	19
102.55	76.13	P68137	ACTS_PIG	Actin, alpha skeletal muscle OS=Sus scrofa GN=ACTA1 PE=3 SV=1	0	99	APEEHPTLLTEAPLNPK		cleaved V-A@N-term	1855.97	619.663	1855.97	619.663	3	21
102.55	76.13	P68137	ACTS_PIG	Actin, alpha skeletal muscle OS=Sus scrofa GN=ACTA1 PE=3 SV=1	0	99	APEEHPTLLTEAPLNPK		cleaved V-A@N-term	1855.97	928.99	1855.97	928.991	2	15
102.55	76.13	P68137	ACTS_PIG	Actin, alpha skeletal muscle OS=Sus scrofa GN=ACTA1 PE=3 SV=1	0	99	APEEHPTLLTEAPLNPK		cleaved V-A@N-term	1855.97	928.99	1855.97	928.991	2	15
102.55	76.13	P68137	ACTS_PIG	Actin, alpha skeletal muscle OS=Sus scrofa GN=ACTA1 PE=3 SV=1	0	99	APEEHPTLLTEAPLNPK		cleaved V-A@N-term	1855.96	928.989	1855.97	928.991	2	16
102.55	76.13	P68137	ACTS_PIG	Actin, alpha skeletal muscle OS=Sus scrofa GN=ACTA1 PE=3 SV=1	0	99	APEEHPTLLTEAPLNPK	Arg-add@N-term	cleaved V-A@N-term	2012.06	671.694	2012.07	671.697	3	15
102.55	76.13	P68137	ACTS_PIG	Actin, alpha skeletal muscle OS=Sus scrofa GN=ACTA1 PE=3 SV=1	0	99	APEEHPTLLTEAPLNPK		cleaved V-A@N-term	1855.97	619.663	1855.97	619.663	3	18
102.55	76.13	P68137	ACTS_PIG	Actin, alpha skeletal muscle OS=Sus scrofa GN=ACTA1 PE=3 SV=1	0	99	APEEHPTLLTEAPLNPK	Arg-add@N-term	cleaved V-A@N-term	2012.06	671.693	2012.07	671.697	3	18
102.55	76.13	P68137	ACTS_PIG	Actin, alpha skeletal muscle OS=Sus scrofa GN=ACTA1 PE=3 SV=1	0	99	APEEHPTLLTEAPLNPK		cleaved V-A@N-term	1855.97	619.663	1855.97	619.663	3	13
102.55	76.13	P68137	ACTS_PIG	Actin, alpha skeletal muscle OS=Sus scrofa GN=ACTA1 PE=3 SV=1	0	96.83	APEEHPTLLTEAPLNPK	Arg-add@N-term	cleaved V-A@N-term	2012.06	671.693	2012.07	671.697	3	14
102.55	76.13	P68137	ACTS_PIG	Actin, alpha skeletal muscle OS=Sus scrofa GN=ACTA1 PE=3 SV=1	0	95.14	APEEHPTLLTEAPLNPK	Arg-add@N-term	cleaved V-A@N-term	2012.06	671.694	2012.07	671.697	3	11
102.55	76.13	P68137	ACTS_PIG	Actin, alpha skeletal muscle OS=Sus scrofa GN=ACTA1 PE=3 SV=1	0	93.81	APEEHPTLLTEAPLNPK		cleaved V-A@N-term	1855.97	619.664	1855.97	619.663	3	12
102.55	76.13	P68137	ACTS_PIG	Actin, alpha skeletal muscle OS=Sus scrofa GN=ACTA1 PE=3 SV=1	0	91.04	APEEHPTLLTEAPLNPK		cleaved V-A@N-term	1855.97	928.993	1855.97	928.991	2	10
102.55	76.13	P68137	ACTS_PIG	Actin, alpha skeletal muscle OS=Sus scrofa GN=ACTA1 PE=3 SV=1	0	85.06	APEEHPTLLTEAPLNPK	Arg-add@N-term	cleaved V-A@N-term	2012.06	671.693	2012.07	671.697	3	11
102.55	76.13	P68137	ACTS_PIG	Actin, alpha skeletal muscle OS=Sus scrofa GN=ACTA1 PE=3 SV=1	0	79.94	APEEHPTLLTEAPLNPK	Arg-add@N-term	cleaved V-A@N-term	2012.06	671.694	2012.07	671.697	3	13
102.55	76.13	P68137	ACTS_PIG	Actin, alpha skeletal muscle OS=Sus scrofa GN=ACTA1 PE=3 SV=1	0	51.12	APEEHPTLLTEAPLNPK	Arg-add@N-term	cleaved V-A@N-term	2012.06	671.694	2012.07	671.697	3	10
102.55	76.13	P68137	ACTS_PIG	Actin, alpha skeletal muscle OS=Sus scrofa GN=ACTA1 PE=3 SV=1	0	42.35	APEEHPTLLTEAPLNPK	Arg-add@N-term	cleaved V-A@N-term	2012.06	504.021	2012.07	504.025	4	12
102.55	76.13	P68137	ACTS_PIG	Actin, alpha skeletal muscle OS=Sus scrofa GN=ACTA1 PE=3 SV=1	0	42.35	APEEHPTLLTEAPLNPK	Arg-add@N-term	cleaved V-A@N-term	2012.06	504.022	2012.07	504.025	4	12
102.55	76.13	P68137	ACTS_PIG	Actin, alpha skeletal muscle OS=Sus scrofa GN=ACTA1 PE=3 SV=1	0	41.05	APEEHPTLLTEAPLNPK	Arg-add@N-term	cleaved V-A@N-term	2012.06	671.694	2012.07	671.697	3	9
102.55	76.13	P68137	ACTS_PIG	Actin, alpha skeletal muscle OS=Sus scrofa GN=ACTA1 PE=3 SV=1	0	75.17	AVFPSIVG		cleaved G-R@C-term	788.442	395.228	788.443	395.229	2	8
102.55	76.13	P68137	ACTS_PIG	Actin, alpha skeletal muscle OS=Sus scrofa GN=ACTA1 PE=3 SV=1	0	71.93	AVFPSIVG		cleaved G-R@C-term	788.441	395.228	788.443	395.229	2	10
102.55	76.13	P68137	ACTS_PIG	Actin, alpha skeletal muscle OS=Sus scrofa GN=ACTA1 PE=3 SV=1	0	70.52	AVFPSIVG		cleaved G-R@C-term	788.442	395.228	788.443	395.229	2	9
102.55	76.13	P68137	ACTS_PIG	Actin, alpha skeletal muscle OS=Sus scrofa GN=ACTA1 PE=3 SV=1	0	99	AVFPSIVGR		cleaved R-P@C-term	944.543	473.279	944.544	473.279	2	7
102.55	76.13	P68137	ACTS_PIG	Actin, alpha skeletal muscle OS=Sus scrofa GN=ACTA1 PE=3 SV=1	0	99	AVFPSIVGR		cleaved R-P@C-term	944.543	473.279	944.544	473.279	2	11
102.55	76.13	P68137	ACTS_PIG	Actin, alpha skeletal muscle OS=Sus scrofa GN=ACTA1 PE=3 SV=1	0	99	AVFPSIVGR		cleaved R-P@C-term	944.543	473.279	944.544	473.279	2	12
102.55	76.13	P68137	ACTS_PIG	Actin, alpha skeletal muscle OS=Sus scrofa GN=ACTA1 PE=3 SV=1	0	99	AVFPSIVGR		cleaved R-P@C-term	944.543	473.279	944.544	473.279	2	10
102.55	76.13	P68137	ACTS_PIG	Actin, alpha skeletal muscle OS=Sus scrofa GN=ACTA1 PE=3 SV=1	0	99	AVFPSIVGR		cleaved R-P@C-term	944.544	473.279	944.544	473.279	2	10
102.55	76.13	P68137	ACTS_PIG	Actin, alpha skeletal muscle OS=Sus scrofa GN=ACTA1 PE=3 SV=1	0	99	AVFPSIVGR		cleaved R-P@C-term	944.543	473.279	944.544	473.279	2	5
102.55	76.13	P68137	ACTS_PIG	Actin, alpha skeletal muscle OS=Sus scrofa GN=ACTA1 PE=3 SV=1	0	99	AVFPSIVGR		cleaved R-P@C-term	944.539	473.277	944.544	473.279	2	4
102.55	76.13	P68137	ACTS_PIG	Actin, alpha skeletal muscle OS=Sus scrofa GN=ACTA1 PE=3 SV=1	0	99	AVFPSIVGR		cleaved R-P@C-term	944.539	473.277	944.544	473.279	2	6
102.55	76.13	P68137	ACTS_PIG	Actin, alpha skeletal muscle OS=Sus scrofa GN=ACTA1 PE=3 SV=1	0	99	AVFPSIVGR		cleaved R-P@C-term	944.544	473.279	944.544	473.279	2	13
[truncated: 21,684 more rows]
