# Supplementary material for: Site-Specific Secretome Map Evidences VSMC-Related Markers of Coronary Atherosclerosis Grade and Extent in the Hypercholesterolemic Swine
Source: Dis Markers. 2015 Aug 25;2015:465242. doi: 10.1155/2015/465242 (PMC4561865; doi:10.1155/2015/465242)
Supplement: Supplementary file 1 — Table S1: List of identified proteins in secretome of HF and CTRL artery samples. Table S2: List of identified peptides for protein in secretome of HF and CTRL artery samples Table S3: Protein list and MS-based protein expressions Table S4, page 1. Histomorphometric data of 134 coronary segments analysed in HF group. Figure S1, page 2. Box plots of Western blot results of CHI3L1 and Cat-D in secretome samples. Figure S2, page 3. Immunostaining micrographs of cell co-localization of anti CHI3L1 with anti CD107a and with anti Mac387 Figure S3, page 4. Double immunostaining micrographs of anti-CHI3L1 and anti-CD107a. Figure S4, page 5. Scatter plot of the relation between average IT values of RCA secretome samples and average IT of all other coronary segments analyzed in each HF case. Figure S5, page 6. Plot of Principal Component Analysis of MS data of secretome samples. [file 465242.f1.zip › 465242.f1/Protein Expression-Table S3_Supplemantary Material.xlsx]

## Sheet: Foglio1
Protein list and MS-based protein expressions
Entry name	ctrl 1	ctrl 2	ctrl 3	ctrl4	ctrl5	ctrl6	HHF1	HHF4	HHF6	HHF7	HHF8	HHF10
HS90A_PIG	2.35E+06	2.39E+06	1.62E+06	2.08E+06	1.58E+06	2.41E+06	2.60E+06	2.83E+06	7.19E+06	2.66E+06	4.12E+06	2.18E+06
FABPH_PIG	7.55E+05	7.02E+05	7.10E+05	7.96E+05	7.11E+05	1.35E+05	1.21E+06	99789	7.99E+05	7.60E+05	1.02E+06	2.46E+05
BGH3_PIG	7.90E+05	1.71E+06	9.15E+05	6.41E+05	9.28E+05	1.71E+06	6.76E+05	8.30E+05	1.24E+06	1.51E+06	8.84E+05	8.42E+05
PP14A_PIG	3.77E+05	2.15E+05	1.35E+05	4.97E+05	1.19E+05	2.22E+05	1.16E+05	1.18E+06	88017	86621	1.34E+05	84219
CRP_PIG	125000	1.35E+05	39950	99627	36542	1.26E+05	1.28E+05	2.50E+05	4.22E+05	68966	1.83E+06	1.63E+05
APOA4_PIG	5.3E+06	5.9E+06	6.4E+06	5.7E+06	6.95E+06	5.48E+06	1.68E+06	1.17E+06	4.04E+06	4.59E+06	3.49E+06	2.17E+06
PDXK_PIG	37000	3.33E+05	42900	34569	43900	3.36E+05	42521	66191	60158	2628	48585	87404
CATA_PIG	9.5E+05	8.2E+05	6.28E+05	9.69E+05	6.35E+05	8.01E+05	6.34E+05	4.23E+05	1.31E+06	6.52E+05	1.00E+06	1.12E+06
IMPA1_PIG	24700	85223	8750.1	22930	8814.1	86224	1.61E+05	1.16E+05	1.52E+05	15124	38459	47699
FA12_PIG	7.30E+05	1.20E+06	6.79E+05	7.00E+05	7.06E+05	1.04E+06	5.17E+05	2.75E+05	4.96E+05	3.64E+05	4.33E+05	3.97E+05
FABP4_PIG	1.45E+06	1.81E+05	1.74E+06	1.56E+06	1.84E+06	1.91E+05	2.12E+06	7.11E+05	1.64E+06	7.83E+05	1.18E+06	2.07E+06
LDHB_PIG	2.63E+06	1.93E+06	1.56E+06	2.73E+06	1.77E+06	1.83E+06	4.17E+06	3.12E+06	3.19E+06	2.87E+06	3.42E+06	5.41E+06
LDHA_PIG	1.79E+07	1.25E+07	2.21E+07	1.72E+07	2.18E+07	1.05E+07	9.68E+06	8.36E+06	1.56E+07	7.65E+06	1.30E+07	1.41E+07
G3P_PIG	2.34E+06	1.45E+06	1.65E+06	2.36E+06	1.50E+06	1.76E+06	2.79E+06	4.51E+06	5.25E+06	1.71E+06	5.07E+06	4.5E+06
AATC_PIG	8.45E+05	2.10E+06	1.22E+06	8.40E+05	1.32E+06	2.15E+06	1.20E+06	9.82E+05	1.70E+06	1.02E+06	1.13E+06	1.32E+06
AATM_PIG	82174	2.65E+05	1.40E+05	81174	1.43E+05	2.70E+05	4.85E+05	1.14E+05	51039	13698	41439	1.20E+05
KAD1_PIG	1.54E+05	6.08E+05	2.57E+05	1.65E+05	2.47E+05	6.14E+05	3.05E+05	3.58E+05	2.16E+05	1.61E+05	1.76E+05	1.92E+05
F16P1_PIG	5.17E+05	3.24E+05	2.26E+05	5.07E+05	2.06E+05	3.30E+05	1.77E+05	2.26E+05	2.96E+05	2.61E+05	3.18E+05	2.46E+05
CATD_PIG	75678	1.35E+05	37650	74999	36650	1.37E+05	9.36E+05	1.07E+06	9.93E+05	1.18E+05	9.82E+05	9.18E+05
CISY_PIG	1067.1	17325	14464	1047.1	13464	18325	19597	7227.2	6248.5	330.9	13691	41149
MYG_PIG	1.52E+06	2.23E+05	2.79E+05	1.56E+06	2.76E+05	2.37E+05	2.22E+05	1.87E+05	3.07E+05	7.54E+05	3.35E+05	3.18E+05
DESM_PIG	4.20E+07	2.45E+07	3.66E+07	4.00E+07	3.55E+07	2.42E+07	4.61E+07	5.9E+07	5.6E+07	5.43E+07	4.29E+07	4.81E+07
VIME_PIG	3.25E+07	1.50E+07	2.89E+07	3.35E+07	2.91E+07	1.55E+07	5.79E+07	6.7E+07	5.0E+07	4.23E+07	4.9E+07	4.05E+07
TBA1A_PIG	3.11E+06	2.63E+06	2.67E+06	3.15E+06	2.78E+06	2.67E+06	2.39E+06	3.83E+06	2.14E+06	3.09E+06	2.12E+06	2.95E+06
TBB_PIG	4.33E+06	2.98E+06	5.08E+06	4.38E+06	5.11E+06	2.92E+06	2.80E+06	4.40E+06	2.31E+06	2.65E+06	2.87E+06	2.01E+06
TERA_PIG	1.10E+06	1.69E+06	9.40E+05	1.14E+06	9.44E+05	1.66E+06	2.19E+06	2.47E+06	7.50E+06	9.32E+05	2.11E+06	2.88E+06
S10AA_PIG	79866	5.36E+05	2.44E+05	78866	2.48E+05	5.32E+05	3.16E+05	3.77E+05	7176.5	82095	50172	95504
SODC_PIG	6.34E+05	8.69E+05	5.85E+05	6.36E+05	5.87E+05	8.65E+05	1.74E+06	5.28E+05	9.86E+05	5.95E+05	6.96E+05	4.94E+05
UROK_PIG	57809	1.15E+05	46540	55546	47121	1.10E+05	60220	7085.7	1.29E+05	52733	63855	17017
AMBP_PIG	6.13E+05	1.05E+06	5.40E+05	6.16E+05	5.43E+05	1.02E+06	22896	1.88E+05	2.12E+05	77572	4.87E+05	5.79E+05
CPNS1_PIG	95839	7.6E+04	36776	94839	35776	7.7E+04	2.70E+05	2.50E+05	2.23E+05	1.69E+05	1.90E+05	3.14E+05
PLMN_PIG	2.75E+06	9.87E+05	3.15E+06	2.79E+06	3.15E+06	9.87E+05	7.99E+05	1.09E+06	2.13E+06	1.08E+06	3.22E+06	2.40E+06
KAP0_PIG	27117	70234	34393	27117	34393	70234	41129	42706	56677	33215	49550	1.09E+05
G6PI_PIG	9.92E+05	1.23E+06	2.28E+06	9.92E+05	2.25E+06	1.26E+06	1.23E+06	1.30E+06	4.80E+06	9.89E+05	2.34E+06	1.52E+06
ANXA4_PIG	745.1	3561.5	1386.5	742.1	1186.5	3581.5	4789.7	2063.4	844.01	89410	3056.9	8101.3
GMPPB_PIG	1788.3	4.21E+05	1.97E+06	1797.3	1.91E+06	4.27E+05	8650.3	5209.4	7035.1	7044.4	5029.2	1.26E+05
FUMH_PIG	4956.8	15880	13546	4966.8	12998	15980	17700	5394.8	24564	27339	3405.7	11750
COF1_PIG	1.46E+06	1.72E+06	2.76E+06	1.49E+06	2.73E+06	1.71E+06	6.41E+06	6.01E+06	7.74E+06	2.81E+06	4.82E+06	2.76E+06
RINI_PIG	3.30E+05	7.83E+05	6.80E+05	3.20E+05	6.88E+05	7.86E+05	6.56E+05	1.01E+06	5.16E+05	5.70E+05	7.17E+05	8.03E+05
HPLN1_PIG	1.15E+05	1.35E+05	1.88E+05	1.10E+05	1.82E+05	1.37E+05	9105.8	16374	18032	15374	9714.9	14327
PP2AB_PIG	67121	55281	5255.4	66121	5155.7	56281	1.21E+05	2.21E+05	68753	34200	67388	59350
AT2A2_PIG	1.23E+05	41671	48993	1.03E+05	47892	42671	19746	91725	1.07E+05	23526	54250	21014
MDHC_PIG	1.95E+06	1.45E+06	2.48E+06	1.97E+06	2.45E+06	1.47E+06	1.10E+06	6.72E+05	1.38E+06	8.39E+05	1.33E+06	1.59E+06
ACBP_PIG	3.54E+06	1.58E+07	6.78E+06	3.50E+06	6.70E+06	1.53E+07	9.37E+06	4.11E+06	2.88E+05	72384	5.50E+06	4.51E+06
GLRX1_PIG	18557	1.77E+05	2.03E+05	18637	2.05E+05	1.70E+05	4.93E+05	1.09E+05	5.91E+05	9265.2	3.06E+05	54243
ICAL_PIG	1.35E+06	2.23E+06	1.6E+06	1.39E+06	1.7E+06	2.20E+06	3.83E+06	5.27E+06	6.1E+06	7.0E+06	8.38E+06	3.30E+06
OSTP_PIG	59908	1.66E+05	1.03E+05	49908	1.09E+05	1.62E+05	2.20E+05	2.97E+05	2.09E+05	661980	3.09E+05	2.48E+05
6PGD_PIG	2.65E+05	1.60E+05	1.83E+05	2.68E+05	1.80E+05	1.65E+05	4.16E+05	3.52E+05	1.08E+06	1.32E+05	3.37E+05	2.09E+05
FIBA_PIG	1.50E+05	32645	3.83E+05	1.54E+05	3.85E+05	31610	4.64E+06	67452	7.58E+05	3.64E+06	1.67E+06	50944
TRFL_PIG	6.61E+06	8.21E+06	9.49E+06	6.64E+06	9.47E+06	8.22E+06	5.37E+06	1.87E+06	1.39E+07	1.39E+07	7.54E+06	9.16E+06
AMPN_PIG	54151	37184	7564.0	53151	7685.7	36185	45698	34894	1.29E+05	24602	41779	48604
RNAS4_PIG	61058	3.36E+05	2.27E+05	60058	2.32E+05	3.38E+05	32340	1.41E+05	1.03E+05	72461	74920	55072
FA9_PIG	6.22E+05	5.58E+05	63494	6.29E+05	62494	5.53E+05	4.09E+05	1.91E+05	6.32E+05	6.45E+05	1.14E+06	68500
APOA1_PIG	107703394110778	65953394110778	81546910097154	105703394110778	82246910097154	65753394110778	1.80E+07	1.23E+07	2.29E+07	2.03E+07	2.28E+07	3.11E+07
APOE_PIG	1.10E+06	1.27E+06	1.10E+06	1.13E+06	1.16E+06	1.25E+06	6.52E+06	4.4E+06	9.32E+06	3.33E+06	5.10E+06	2.96E+06
ANXA1_PIG	1.21E+05	4.90E+05	2.32E+05	1.25E+05	2.35E+05	4.80E+05	2.73E+05	4.53E+05	2.33E+05	10291	2.01E+05	4.92E+05
ANXA2_PIG	3.10E+06	1.49E+06	6.57E+06	3.14E+06	6.51E+06	1.41E+06	3.61E+06	5.05E+06	5.82E+06	4.09E+06	3.19E+06	1.41E+07
SPRC_PIG	3.90E+05	2.38E+06	3.35E+06	3.94E+05	3.30E+06	2.34E+06	1.03E+06	3.67E+05	5.20E+05	4.18E+05	2.89E+05	2.08E+05
GELS_PIG	1.37E+07	1.25E+07	6.50E+06	1.34E+07	6.53E+06	1.21E+07	4.72E+06	8.49E+06	1.08E+07	1.26E+07	1.07E+07	6.74E+06
PPCE_PIG	52308	2.06E+05	85756	51308	83757	2.09E+05	7.00E+05	1.41E+05	42150	30461	4.62E+05	5.57E+05
MOES_PIG	1.73E+06	4.46E+06	4.10E+06	1.79E+06	4.18E+06	4.43E+06	5.99E+06	7.4E+06	9.15E+06	4.47E+06	5.89E+06	7.14E+06
RADI_PIG	1.10E+06	4.58E+06	2.83E+06	1.14E+06	2.86E+06	4.55E+06	7.21E+06	5.10E+06	3.17E+06	6.58E+06	2.52E+06	8.29E+06
VINC_PIG	4.30E+07	4.73E+07	4.64E+07	4.50E+07	4.4E+07	4.63E+07	5.43E+07	6.44E+07	3.38E+07	5.78E+07	5.49E+07	3.33E+07
IL6_PIG	1.22E+06	1.21E+07	3.71E+06	1.18E+06	3.91E+06	1.31E+07	1.13E+07	3.71E+06	1.96E+06	3.29E+06	2.44E+06	4.60E+06
APOC3_PIG	67508	38877	14613	68508	13616	39897	65683	97442	78726	4.05E+05	72193	28033
SRBS2_PIG	3.74E+05	2.33E+05	4.54E+05	3.78E+05	4.48E+05	2.35E+05	2.25E+05	1.24E+05	2.30E+05	8.54E+05	3.33E+05	1.53E+05
CALR_PIG	81086	5476.1	3879.9	80083	3945.9	5540.1	68571	1.05E+05	3020.7	770.81	1126.1	69447
AMPL_PIG	155.21	14154	893.55	164.24	891.23	20154	8665.6	1109.3	773.95	4551.5	10551	895.14
MYL9_PIG	2.32E+06	2.91E+06	6.23E+05	2.35E+06	6.34E+05	2.96E+06	2.31E+06	3.74E+06	9.57E+05	2.24E+06	1.38E+06	1.22E+06
EF1B_PIG	2.01E+05	2.55E+05	1.41E+05	2.08E+05	1.43E+05	2.53E+05	33433	7.42E+05	1.37E+05	26191	1.90E+05	64996
FETUA_PIG	3.70E+07	8.79E+06	3.12E+07	3.77E+07	3.15E+07	8.73E+06	2.64E+06	6.52E+06	8.23E+06	5.67E+06	4.31E+06	5.51E+06
GNAS_PIG	1.08E+05	4524.3	6331	1.04E+05	6251	4633.3	1.11E+05	7066.9	39596	2.17E+05	88430	728.65
S10AB_PIG	1.65E+05	4.98E+05	6.30E+05	1.60E+05	6.40E+05	4.91E+05	1.84E+06	8.64E+05	2.06E+06	6.81E+05	1.5E+06	2.38E+06
GRP78_PIG	4.17E+05	1.90E+06	4.53E+05	4.12E+05	4.50E+05	1.96E+06	1.08E+06	5.35E+06	1.02E+06	3.74E+05	1.21E+06	1.56E+06
TIMP1_PIG	1.20E+06	2.19E+06	2.68E+05	1.22E+06	2.63E+05	2.17E+06	4.75E+05	90011	5.24E+05	1.52E+06	5.55E+05	1.36E+05
CAN1_PIG	2.48E+05	5.74E+05	2.76E+05	2.43E+05	2.89E+05	5.89E+05	6.68E+05	5.49E+05	8.26E+05	6.55E+05	6.79E+05	2.36E+05
KAPCA_PIG	1.40E+05	58467	61550	1.44E+05	61389	57467	78356	1.30E+05	1.21E+05	39714	2.05E+05	14920
ACY1_PIG	1.15E+05	4.30E+05	1.29E+05	1.18E+05	1.27E+05	4.32E+05	21231	2.27E+05	24304	46726	15873	1.65E+05
TPM1_PIG	4.53E+07	3.16E+07	3.24E+07	4.56E+07	3.27E+07	3.11E+07	3.35E+07	3.06E+07	1.92E+07	3.92E+07	2.53E+07	3.15E+07
CAN2_PIG	7.64E+05	5.79E+05	3.55E+05	7.60E+05	3.45E+05	5.78E+05	3.48E+05	2.42E+05	4.42E+05	6.36E+05	5.50E+05	5.87E+05
RS12_PIG	1.08E+05	5.40E+05	5.35E+05	1.02E+05	5.38E+05	5.45E+05	1.53E+05	4.34E+05	3.08E+05	1.72E+05	2.71E+05	4.65E+05
THOP1_PIG	3244.5	9797.4	21106	3194.7	20766	9807.6	2398.4	32158	8595.4	2759.2	12737	5547.6
VTNC_PIG	1.08E+06	7.64E+05	2.22E+06	1.03E+06	2.02E+06	7.69E+05	7.18E+05	7.10E+05	2.01E+06	5.26E+05	2.39E+06	1.82E+06
TTHY_PIG	66191	1.17E+05	2.21E+05	65251	2.16E+05	1.18E+05	45379	46566	26658	45885	45099	9147.7
A1AT_PIG	2.77E+06	5.44E+05	4.53E+05	2.67E+06	4.58E+05	5.54E+05	6.23E+05	1.15E+06	7.92E+05	8.01E+05	4.53E+05	1.97E+06
AK1A1_PIG	9.40E+05	2.18E+06	1.67E+06	9.45E+05	1.70E+06	2.21E+06	2.48E+06	1.74E+06	1.60E+06	2.11E+06	1.67E+06	1.92E+06
HEMO_PIG	2.10E+07	1.38E+07	1.27E+07	2.00E+07	1.26E+07	1.31E+07	5.65E+06	2.90E+06	8.98E+06	8.73E+06	1.15E+07	1.06E+07
PF12_PIG	5122	16930	28183	5091	27783	17330	26525	8052.7	14444	63385	22161	23412
CFAD_PIG	4.57E+05	6.61E+05	9.23E+05	4.59E+05	9.32E+05	6.64E+05	30635	1.74E+05	2.58E+05	2.54E+05	49248	55285
PRDX2_PIG	3.45E+06	2.44E+06	4.86E+06	3.40E+06	4.48E+06	2.49E+06	4.77E+06	1.68E+06	1.01E+07	3.79E+06	5.25E+06	3.35E+06
RL10A_PIG	72119	94958	1.18E+05	71819	1.25E+05	95458	91065	2.90E+05	32284	48849	55355	1.16E+05
2AAA_PIG	1.60E+05	1.49E+06	5.88E+05	1.65E+05	5.99E+05	1.39E+06	7.38E+05	1.07E+06	4.76E+05	4.96E+05	5.98E+05	6.64E+05
MYL6_PIG	2.54E+06	1.28E+06	7.43E+05	2.60E+06	7.40E+05	1.20E+06	1.70E+06	4.37E+06	1.20E+06	4.86E+06	1.59E+06	1.21E+06
DEST_PIG	1.67E+06	3.64E+06	2.94E+06	1.72E+06	2.84E+06	3.68E+06	4.36E+06	2.22E+06	1.27E+06	2.81E+06	1.83E+06	1.51E+06
TCTP_PIG	5519.1	48082	11902	5479.3	12002	47284	22123	72446	1.82E+05	76107	1.95E+05	35097
PP1B_PIG	1.49E+06	9.10E+05	1.95E+06	1.49E+06	1.95E+06	9.10E+05	1.55E+06	3.66E+06	2.31E+06	6.97E+05	1.62E+06	2.01E+06
SUMO2_PIG	84084	16131	15990	83484	16390	15832	4.05E+05	2.71E+05	4.67E+05	1.36E+05	3.33E+05	7733.3
CYC_PIG	35127	95190	2.75E+05	34847	2.70E+05	94480	69630	53397	1.45E+05	31379	1.73E+05	44666
PPIA_PIG	8.28E+05	3.28E+06	4.15E+06	8.39E+05	4.05E+06	3.20E+06	3.93E+06	4.32E+06	2.62E+06	4.66E+05	2.48E+06	3.58E+06
RL40_PIG	1.90E+05	4.99E+05	5.71E+05	1.98E+05	5.91E+05	4.94E+05	1.21E+06	7.56E+05	7.20E+05	4.74E+05	3.98E+05	6.13E+05
TPM4_PIG	2.81E+07	2.88E+07	2.21E+07	2.86E+07	2.27E+07	2.85E+07	2.29E+07	3.84E+07	1.27E+07	2.04E+07	1.76E+07	2.07E+07
ITIH4_PIG	5.53E+06	2.55E+06	6.42E+06	5.57E+06	6.36E+06	2.57E+06	2.73E+06	1.44E+06	1.11E+07	3.58E+06	1.39E+07	2.49E+06
MYLK_PIG	3.71E+05	3.11E+05	6.08E+05	3.69E+05	6.05E+05	3.10E+05	9.18E+05	3.69E+05	1.49E+05	1.21E+06	8.52E+05	5.69E+05
MYH7_PIG	2.80E+06	2.32E+06	4.15E+06	2.83E+06	4.05E+06	2.37E+06	5.03E+06	5.68E+06	4.26E+06	3.30E+06	9.21E+06	3.68E+06
UGPA_PIG	1.10E+05	1.69E+05	88109	1.19E+05	87399	1.63E+05	6.26E+05	5.23E+05	1.82E+06	2.73E+05	1.13E+06	1.63E+06
PAI1_PIG	1.63E+06	1.58E+06	4.52E+05	1.67E+06	4.12E+05	1.56E+06	2.88E+06	8.61E+05	1.10E+06	2.69E+06	1.39E+06	5.07E+05
MFGM_PIG	23006	1.60E+05	85978	22396	86178	1.63E+05	2.06E+05	3.20E+05	2.29E+05	2247.6	2585.3	4.40E+05
GSTP1_PIG	9.01E+05	3.40E+06	1.97E+06	9.07E+05	1.87E+06	3.49E+06	5.49E+06	6.26E+06	2.54E+06	1.48E+06	1.49E+06	2.61E+06
ILEU_PIG	1.20E+06	1.77E+06	1.37E+06	7.47E+05	1.12E+06	1.64E+06	2.48E+06	3.28E+06	1.33E+06	5.34E+05	1.95E+06	2.78E+06
ALDR_PIG	4.56E+05	4.75E+05	7.57E+05	7.29E+05	5.60E+05	1.13E+06	2.07E+06	1.11E+06	2.00E+06	5.35E+05	1.56E+06	1.43E+06
PIMT_PIG	1.11E+07	1.45E+07	8.92E+06	6.68E+06	2.18E+07	1.78E+07	4.05E+06	4.54E+06	5.14E+06	1.92E+05	7.61E+06	1.86E+07
MYH11_PIG	2.32E+05	4.01E+05	4.60E+05	5.76E+05	44327	5.07E+05	82521	11952	2.05E+05	4.86E+05	2.20E+06	1.66E+05
THIO_PIG	2.93E+06	3.57E+06	2.37E+06	1.96E+06	4.46E+06	3.14E+06	9.04E+06	5.21E+06	4.94E+06	3.59E+06	4.84E+06	7.20E+06
NB5R3_PIG	99112	2.22E+05	2.79E+05	1.77E+05	58432	1.18E+05	5.58E+05	2.23E+05	55426	61314	1.14E+05	37640
TFP11_PIG	14189	18911	7426.2	3121.7	2684.7	2397.5	20028	2048.8	22431	14148	3022	20022
RAB1B_PIG	2.04E+05	5.39E+05	2.28E+05	3.81E+05	1.49E+05	2.53E+05	2.67E+05	3.83E+05	4.86E+05	4.00E+05	4.93E+05	41870
B2MG_PIG	90231	55041	43754	1.31E+05	96058	70295	7.68E+05	2.69E+05	2.80E+05	3.96E+05	2.17E+05	2.31E+05
CNN1_PIG	1.02E+07	8.14E+06	4.81E+06	4.99E+06	7.80E+06	7.30E+06	1.61E+07	1.22E+07	5.69E+06	3.73E+07	1.19E+07	3.55E+06
CNN2_PIG	3.12E+05	2.20E+05	1.61E+05	1.14E+05	68493	5.79E+05	2.65E+05	5.94E+05	60438	94874	1.99E+05	3.80E+05
RS3_PIG	46233	52761	47151	79983	59471	50788	1.32E+05	87555	1.38E+05	1.16E+05	1.22E+05	2.25E+05
THRB_PIG	5.56E+05	2.69E+05	4.67E+05	2.28E+06	1.21E+06	1.32E+06	2.90E+05	6.38E+05	7.96E+05	6.54E+05	1.17E+06	5.47E+05
ENOB_PIG	1.02E+06	1.84E+06	1.51E+06	3.61E+06	1.87E+06	2.04E+06	1.50E+06	5.75E+06	5.73E+06	2.20E+06	3.41E+06	1.48E+06
VWF_PIG	10877	8329.2	34232	7700.4	13875	5313.3	3835.2	6768.6	8305.9	24165	7538.4	22287
CBR1_PIG	43983	16725	39692	12374	2.90E+05	2.27E+05	72153	66201	52577	71244	45599	40426
FCN2_PIG	3.65E+05	2.44E+05	2.56E+05	2.34E+05	33801	11071	1.96E+05	3.53E+05	4.02E+05	5.51E+05	8.71E+05	8.60E+05
VATA_PIG	2.97E+05	2.74E+05	4.61E+05	3.81E+05	6.73E+05	1.09E+06	6.42E+05	3.86E+05	3.37E+05	2.42E+05	3.82E+05	5.66E+05
ITIH1_PIG	1.22E+06	9.93E+06	1.66E+07	4.49E+06	6.49E+06	1.48E+07	3.47E+06	2.88E+06	6.13E+06	5.23E+06	3.46E+06	1.13E+07
ENPL_PIG	7.76E+05	5.14E+05	6.03E+05	3.20E+06	3.43E+05	4.14E+06	6.48E+05	4.48E+05	3.04E+06	1.70E+06	1.67E+06	1.85E+06
PTGDS_PIG	63364	50644	71207	1.14E+05	29970	59827	4.12E+05	1.11E+05	2.68E+05	1.56E+05	71989	99978
PTBP1_PIG	36936	38946	26471	56452	56692	46451	1.22E+05	3.20E+05	1.87E+05	72757	1.25E+05	63936
TENA_PIG	3.08E+06	9.08E+05	1.60E+06	2.23E+06	3.94E+06	2.64E+06	2.20E+06	1.45E+06	2.20E+06	2.37E+06	1.55E+06	2.65E+06
RS16_PIG	43382	13323	4820.6	14144	13181	19926	77350	1.12E+05	42380	2281.9	76232	1.73E+05
RLA0_PIG	60616	1.50E+05	1.57E+06	1.82E+05	1.18E+06	7.30E+05	1.15E+05	5.98E+05	4.60E+05	4.26E+05	4.55E+05	5.73E+05
CAZA2_PIG	3.02E+05	3.10E+05	3.16E+05	3.43E+05	8.20E+05	1.11E+06	1.84E+05	1.01E+06	5.83E+05	1.95E+05	2.00E+05	9.00E+05
CLIC1_PIG	10119	25474	418.84	47104	11558	13597	1.64E+05	3784.2	2.51E+05	76074	1.41E+05	2440.5
CYTB_PIG	6.47E+05	8.58E+05	1.16E+06	6.03E+05	6.15E+05	3.76E+05	2.20E+06	3.85E+05	2.09E+06	9.67E+05	8.59E+05	3.04E+06
RLA2_PIG	3.16E+05	4.37E+05	5.85E+05	3.11E+05	1.23E+05	58194	7.07E+05	1.31E+06	1.06E+06	3.73E+05	1.19E+06	9.45E+05
TPIS_PIG	3.30E+06	3.03E+06	2.59E+06	3.35E+06	4.13E+06	3.93E+06	3.25E+06	3.46E+06	7.31E+06	1.96E+06	6.95E+06	3.78E+06
EF1G_PIG	4.63E+05	3.64E+05	5.11E+05	2.23E+05	2.69E+05	4.86E+05	2.67E+05	2.20E+05	5.34E+05	1.47E+05	5.52E+05	4.33E+05
CH3L1_PIG	90049	57227	87492	1.00E+05	9.0E+04	22746	4.81E+05	8.27E+05	1.2E+06	1.91E+05	1.16E+06	1.39E+06
ICA_PIG	8.56E+06	4.19E+06	5.13E+06	2.94E+07	1.67E+07	7.85E+06	5.45E+06	7.10E+06	1.43E+07	9.22E+06	9.86E+06	3.84E+06
CLUS_PIG	5.36E+05	6.50E+05	7.36E+05	1.05E+06	1.11E+06	1.88E+06	9.39E+05	1.07E+06	1.28E+06	6.70E+05	1.16E+06	1.74E+06
KCY_PIG	2.45E+05	19528	1.30E+05	38245	1.05E+05	1.32E+05	3.10E+05	1.80E+05	2.85E+05	69355	1.68E+05	2.01E+05
KCRB_PIG	4.45E+05	4.59E+05	2.98E+05	7.36E+05	1.40E+06	3.68E+05	2.65E+05	1.45E+06	1.99E+05	28950	5.61E+05	4.82E+05
ATPA2_PIG	12779	8971.8	16566	33581	22764	1.55E+05	9024.1	1.92E+05	2476.1	8165.6	15353	3898.7
S10A6_PIG	1.12E+05	2.10E+05	1.17E+05	1.59E+05	2.4E+05	2.97E+05	4.23E+05	4.15E+05	7.56E+05	3.46E+05	3.69E+05	4.51E+05
NDKB_PIG	6.02E+05	5.79E+05	4.92E+05	6.23E+05	5.67E+05	1.20E+06	1.41E+06	7.73E+05	2.66E+06	1.19E+06	1.51E+06	1.10E+06
ATPO_PIG	7.11E+05	29462	8.47E+05	6.65E+05	7.37E+05	2282.5	2.55E+05	2.09E+05	2.74E+05	2.69E+05	3.11E+05	2.67E+05
RN19A_PIG	27006	20218	44679	9.12E+05	1.80E+05	30959	23764	43917	51651	1.30E+05	80734	1.27E+05
TBA1B_PIG	5.96E+06	6.06E+06	4.95E+06	4.07E+06	4.02E+06	4.26E+06	3.02E+06	5.81E+06	2.62E+06	3.66E+06	2.41E+06	3.48E+06
LMNA_PIG	1.89E+07	1.26E+07	1.95E+07	1.46E+07	8.33E+06	7.82E+06	2.1E+07	1.44E+07	1.95E+07	1.84E+07	1.52E+07	1.63E+07
HPRT_PIG	2.21E+05	1.65E+05	1.82E+05	26709	1.06E+05	44778	1.40E+05	93151	1.66E+05	32074	1.29E+05	1.71E+05
LEG1_PIG	9.54E+05	3.81E+06	7.69E+05	3.34E+06	1.90E+06	4.62E+06	3.17E+06	2.99E+06	1.76E+07	1.26E+07	1.27E+07	1.84E+06
RSSA_PIG	1.16E+06	1.74E+05	3.10E+05	63442	1.56E+05	2.13E+05	1.94E+05	4.26E+05	1.25E+05	1.86E+05	2.20E+05	2.95E+05
TYRP2_PIG	765.27	1502.3	7222.2	550.93	6051.9	1523.8	11466	4301.5	1956.5	3918.6	2587.9	7955.1
RB11A_PIG	1.36E+05	1.20E+05	94184	66662	3.83E+05	1.66E+06	2.84E+05	4.61E+05	3.41E+05	2.55E+05	4.38E+05	2.58E+05
ARL3_PIG	1304.9	9005.6	8081.7	1436.7	17613	8478.9	35441	9168	19044	19756	14926	9247.9
RAB14_PIG	35897	33300	2.14E+05	1.50E+05	75319	28661	1.60E+05	1.08E+05	1.51E+05	1.31E+05	1.24E+05	27182
COF2_PIG	1.76E+06	1.32E+06	1.23E+06	8.48E+05	9.12E+05	1.39E+06	2.94E+06	1.88E+06	2.19E+06	1.42E+06	2.37E+06	9.09E+05
DMD_PIG	2.08E+06	1.53E+06	2.06E+06	1.48E+06	2.66E+06	2.29E+06	3.52E+06	2.40E+06	1.71E+06	1.41E+06	4.50E+06	5.25E+06
LMCD1_PIG	5.91E+05	5.52E+05	3.83E+05	6.41E+05	4.43E+05	5.58E+05	2.77E+05	6.97E+05	7.88E+05	1.32E+06	8.12E+05	5.46E+05
CAH3_PIG	5.61E+05	5.09E+05	1.47E+06	1.11E+06	1.27E+06	2.14E+06	7.73E+05	8.12E+05	1.52E+06	1.19E+06	7.37E+05	1.31E+06
HSPB1_PIG	5.63E+06	3.95E+06	2.62E+06	4.04E+06	2.65E+06	4.11E+06	2.28E+06	5.71E+06	1.30E+06	2.86E+06	2.80E+06	2.52E+06
KCRM_PIG	3.18E+06	4.28E+06	3.37E+06	2.06E+06	1.09E+06	5.19E+06	1.94E+06	5.14E+06	1.50E+06	2.58E+05	2.27E+06	2.57E+06
PSME1_PIG	4.99E+05	4.59E+05	6.19E+05	1.04E+06	6.97E+05	4.75E+05	1.03E+06	2.28E+05	8.21E+05	1.26E+06	8.30E+05	4.81E+05
C1S_PIG	1.11E+05	83830	1.68E+05	1.36E+05	1.29E+05	1.48E+05	51923	91721	1.22E+05	1.30E+05	57913	1.11E+05
STMN1_PIG	5.39E+05	7.85E+05	5.05E+05	5.51E+05	1.32E+05	1.36E+05	3.89E+05	1.76E+05	2.37E+05	6.80E+05	2.78E+05	2.69E+05
GDIB_PIG	2.63E+06	2.37E+06	2.29E+06	1.92E+06	2.16E+06	2.60E+06	2.85E+06	3.38E+06	5.84E+06	3.35E+06	4.08E+06	3.56E+06
RS28_PIG	86093	1.45E+05	62058	11973	2.08E+05	4.20E+05	5075.4	5.05E+05	31961	2524.8	26388	4.52E+05
PDLI3_PIG	1.88E+05	1.84E+05	1.04E+05	2.09E+05	8.67E+05	1.00E+06	2.20E+05	3.80E+05	1.21E+05	2.00E+05	2.60E+05	1.83E+05
CAV1_PIG	1.12E+05	1.00E+05	63055	93150	48238	1.48E+05	53330	87109	46548	1.13E+05	32014	41446
HS71B_PIG	3.25E+06	4.62E+06	4.27E+06	3.40E+06	7.74E+06	6.89E+06	4.85E+06	5.99E+06	4.38E+06	5.32E+06	4.60E+06	8.09E+06
SAHH_PIG	3.64E+05	3.15E+05	5.10E+05	3.85E+05	4.10E+05	2.69E+05	5.40E+05	3.76E+05	1.26E+06	3.63E+05	6.21E+05	3.60E+05
TBB5_PIG	2.10E+06	3.25E+06	2.72E+06	4.40E+06	5.21E+06	2.82E+06	2.70E+06	4.44E+06	2.28E+06	2.89E+06	2.55E+06	2.41E+06
CRYAB_PIG	2.17E+05	73007	1.98E+05	5.29E+05	1.68E+05	1.33E+05	95521	2.21E+05	3.88E+05	7.56E+05	4.81E+05	2.44E+05
PGK1_PIG	2.77E+06	2.26E+06	1.67E+06	3.66E+06	3.93E+06	7.19E+06	4.66E+06	5.76E+06	8.28E+06	3.47E+06	6.00E+06	3.46E+06
OXSR1_PIG	44298	46857	38471	1.32E+05	98410	79407	47903	1.07E+05	78283	1.26E+05	62068	88823
PSME2_PIG	1.26E+05	97779	52707	27618	1.25E+05	1.18E+05	1.75E+05	1.04E+05	2.83E+05	94191	1.47E+05	1.91E+05
PGRP2_PIG	929.96	7346.9	3125.2	40561	37678	1.24E+05	2724.8	43871	1347	1827.3	1359.3	528.58
SDC4_PIG	9157.9	47487	50579	1.12E+05	1.30E+05	5.01E+05	2.57E+05	71290	7868.2	35627	17313	54929
DCPS_PIG	50900	22212	53918	16532	41302	1.56E+05	39533	84136	76254	4818.4	42914	50980
GPX1_PIG	1.50E+05	51146	1.54E+05	1.53E+05	1.20E+05	89370	2.51E+05	3.41E+05	4.17E+05	1.64E+05	2.99E+05	3.95E+05
DHPR_PIG	1.14E+05	1.62E+05	1.32E+05	61229	1.95E+05	1.66E+05	93512	25858	1.63E+05	1.15E+05	1.06E+05	59086
TYB4_PIG	8.76E+05	2.89E+05	7.10E+05	6.43E+05	1.00E+06	7.00E+05	1.06E+06	3.71E+05	3.80E+05	2.99E+05	1.95E+05	1.42E+06
RL29_PIG	8531.6	8270.6	2995.9	22258	26564	26165	60633	1.45E+05	11977	52709	22452	23889
RL13A_PIG	24609	13639	28537	29655	61996	16596	20478	20359	29748	18269	89186	29553
COMT_PIG	1.27E+05	63502	87568	92916	2.63E+05	2.76E+05	3.53E+05	4.47E+05	3.73E+05	1.06E+05	2.60E+05	2.19E+05
NPL_PIG	18663	11269	13635	5452.7	8496.5	9995.7	1.37E+05	17250	3.54E+05	35896	2.13E+05	43904
ESTD_PIG	1.53E+05	1.07E+05	78566	17196	49540	1.51E+05	65298	17479	89570	79083	59648	1.15E+05
PGS1_PIG	1.01E+06	1.43E+06	4.69E+05	1.09E+06	5.78E+05	2.20E+06	2.06E+06	1.5E+06	1.03E+06	6.48E+05	1.10E+06	1.03E+06
GALM_PIG	1.55E+07	1.17E+07	1.16E+07	3.14E+05	8.46E+06	3.27E+06	1.72E+07	3.14E+06	4.69E+06	8.33E+06	8.11E+06	1.27E+07
ITB1_PIG	1452.3	3204.8	4766.1	560.73	7257.6	879.97	7513.7	684.6	844.57	694.2	1938.4	9134.7
PROC_PIG	2.43E+05	92084	1.58E+05	3.81E+05	3.64E+05	2.55E+05	82625	86628	2.89E+05	2.76E+05	2.66E+05	42036
RPN1_PIG	1.17E+05	1.41E+05	2.00E+05	4.23E+05	1.58E+05	81831	92569	91287	5.35E+05	64523	4.32E+05	1.24E+05
GSTO1_PIG	1.83E+05	1.68E+05	2.18E+05	5.20E+05	2.03E+05	1.37E+05	3.53E+05	4.38E+05	8.78E+05	1.96E+05	1.03E+06	1.98E+05
PRDX6_PIG	1.99E+06	2.03E+06	1.44E+06	1.10E+06	1.10E+06	1.52E+06	2.15E+06	1.71E+06	3.30E+06	1.39E+06	1.87E+06	1.08E+06
THBG_PIG	2.48E+06	1.84E+06	1.93E+06	1.15E+06	3.13E+06	8.85E+05	1.41E+06	5.09E+05	2.24E+06	1.34E+06	6.43E+06	2.88E+06
FMOD_PIG	24413	18798	1.17E+05	52789	8305.5	1.12E+05	62589	68331	73443	2.36E+05	50271	31634
CO7_PIG	7.19E+05	2.55E+06	3.09E+06	8.23E+05	1.85E+06	1.52E+06	1.56E+06	1.41E+06	1.79E+06	1.79E+06	1.56E+06	2.01E+06
VATH_PIG	11623	25200	27352	17555	8667.6	16157	11541	15359	13107	2.41E+05	19880	24760
PGS2_PIG	7.37E+05	1.04E+06	3.51E+05	5.24E+05	1.24E+05	3.50E+05	1.8E+06	4.3E+05	1.43E+06	1.70E+05	1.26E+06	8.82E+05
