# Supplementary material for: Site-Specific Secretome Map Evidences VSMC-Related Markers of Coronary Atherosclerosis Grade and Extent in the Hypercholesterolemic Swine
Source: Dis Markers. 2015 Aug 25;2015:465242. doi: 10.1155/2015/465242 (PMC4561865; doi:10.1155/2015/465242)
Supplement: Supplementary file 1 — Table S1: List of identified proteins in secretome of HF and CTRL artery samples. Table S2: List of identified peptides for protein in secretome of HF and CTRL artery samples Table S3: Protein list and MS-based protein expressions Table S4, page 1. Histomorphometric data of 134 coronary segments analysed in HF group. Figure S1, page 2. Box plots of Western blot results of CHI3L1 and Cat-D in secretome samples. Figure S2, page 3. Immunostaining micrographs of cell co-localization of anti CHI3L1 with anti CD107a and with anti Mac387 Figure S3, page 4. Double immunostaining micrographs of anti-CHI3L1 and anti-CD107a. Figure S4, page 5. Scatter plot of the relation between average IT values of RCA secretome samples and average IT of all other coronary segments analyzed in each HF case. Figure S5, page 6. Plot of Principal Component Analysis of MS data of secretome samples. [file 465242.f1.zip › 465242.f1/ProteinSummary-TableS1_Supplementary Material.xlsx]

## Sheet: Foglio1
Table S1: List of identified proteins in secretome of HF and CTRL artery samples
%Cov(95)1	Paragon scores	Accession2	Entry name3	Name3	Peptides4	Localization5	Secretome P6	Signal peptide7
26.7	17.34	P54612	2AAA_PIG	Serine/threonine-protein phosphatase 2A	10	Cytoplasm.	0.562	-
34.4	13	P14332	6PGD_PIG	6-phosphogluconate dehydrogenase, decarboxylating	8	Cytoplasm.	0.389	-
43.7	28.14	P50447	A1AT_PIG	Alpha-1-antitrypsin (Serpin)	16	Secreted.	0.799	signal peptide predicted by SignalP
45	23.04	P00503	AATC_PIG	Aspartate aminotransferase, cytoplasmic	12	Cytoplasm.	0.430	-
9.8	6.04	P00506	AATM_PIG	Aspartate aminotransferase, mitochondrial	3	Mitochondrion. Cell membrane	0.490	signal peptide predicted by SignalP
59.8	8	P12026	ACBP_PIG	Acyl-CoA-binding protein	5	Endoplasmic reticulum	0.541	-
73.3	90.36	Q6QAQ1	ACTB_PIG	Actin, cytoplasmic 1	103	cytoskeleton associated	0.498	-
28.5	10.93	P37111	ACY1_PIG	Aminoacylase-1	6	Cytoplasm.	0.414	-
27.7	12.97	P50578	AK1A1_PIG	Alcohol dehydrogenase [NADP+]	9	Cytoplasm.	0.568	-
54.4	18.45	P80276	ALDR_PIG	Aldose reductase	13	Cytoplasm.	0.361	-
12.5	6.01	P04366	AMBP_PIG	Protein AMBP (Bikunin)	4	Secreted.	0.482	-
50	2	P28839	AMPL_PIG	Cytosol aminopeptidase	1	Cytoplasm.	_	_
2.8	2.29	P15145	AMPN_PIG	Aminopeptidase N	2	Membrane	0.728	signal peptide predicted by SignalP
9	4.02	P19619	ANXA1_PIG	Annexin A1	3	Cytoplasm	0.506	-
44.5	22.5	P19620	ANXA2_PIG	Annexin A2	13	ECM	0.748	-
2.2	2	P08132	ANXA4_PIG	Annexin A4	1	exocytic pathway	0.418	-
71.3	46.62	P18648	APOA1_PIG	Apolipoprotein A-I	39	ECM associated	0.883	signal peptide predicted by SignalP
67.3	44.45	O46409	APOA4_PIG	Apolipoprotein A-IV	24	Secreted.	0.663	signal peptide predicted by SignalP
39.6	4.36	P27917	APOC3_PIG	Apolipoprotein C-III	3	Secreted.	0.939	signal peptide predicted by SignalP
44.2	24.28	P18650	APOE_PIG	Apolipoprotein E	19	ECM associated	0.805	signal peptide predicted by SignalP
12.1	2	Q52NJ4	ARL3_PIG	ADP-ribosylation factor-like protein 3	1	Golgi apparatus	0.626	-
2	2.12	P11607	AT2A2_PIG	Sarcoplasmic/endoplasmic reticulum calcium ATPase 2	1	Endoplasmic reticulum membrane;	0.624	-
10.1	2	Q29596	ATPA2_PIG	ATP synthase subunit alpha liver isoform, mitochondrial	1	Mitochondrion	0.845	-
4.2	2.01	Q2EN81	ATPO_PIG	ATP synthase subunit O, mitochondrial	1	Mitochondrion	0.737	-
38.1	4.04	Q07717	B2MG_PIG	Beta-2-microglobulin	4	Secreted.	0.901	signal peptide predicted by SignalP
42.8	30.75	O11780	BGH3_PIG	Transforming growth factor-beta-induced protein ig-h3	20	ECM associated	0.632	signal peptide predicted by SignalP
2.8	2	A4UTQ2	BTG3_PIG	Protein BTG3	1	Secreted	0.665	-
7.3	8	Q69DK8	C1S_PIG	Complement C1s subcomponent	4	Secreted	0.778	signal peptide predicted by SignalP
39.6	20.34	Q5S1S4	CAH3_PIG	Carbonic anhydrase 3	11	Cytoplasm.	0.394	-
11.4	2	P28491	CALR_PIG	Calreticulin	1	Endoplasmic reticulum	0.359	signal peptide predicted by SignalP
14.3	10.46	P35750	CAN1_PIG	Calpain-1 catalytic subunit	9	Cytoplasm.	0.562	-
33	9.25	P43367	CAN2_PIG	Calpain-2 catalytic subunit	6	Cytoplasm.	0.541	-
27.8	8.38	A0PFK7	CAPZB_PIG	F-actin-capping protein subunit beta	5	ECM associated	0.563	-
23.5	15.21	O62839	CATA_PIG	Catalase	8	Peroxisome.	0.411	-
36.1	7.27	A1E295	CATB_PIG	Cathepsin B	7	Exocytic pathway, lisosome	0.768	signal peptide predicted by SignalP
28.1	7.92	P00795	CATD_PIG	Cathepsin D	6	Exocytic pathway, lisosome	0.570	-
7.9	2.02	Q6RVA9	CAV1_PIG	Caveolin-1	1	membrane	0.501	-
10.7	3.68	Q28960	CBR1_PIG	Carbonyl reductase [NADPH]	3	Cytoplasm.	0.673	-
23	4.04	Q007T2	CDC42_PIG	Cell division control protein 42	3	Cell membrane;	0.747	-
35.1	8.02	P51779	CFAD_PIG	Complement factor D	5	Secreted.	0.932	signal peptide predicted by SignalP
9.7	5.52	Q29411	CH3L1_PIG	Chitinase-3-like protein 1	3	Secreted. extracellular space.	0.534	signal peptide predicted by SignalP
1.9	2	P00889	CISY_PIG	Citrate synthase, mitochondrial	1	Mitochondrion	0.600	-
10.9	2.01	Q29238	CLIC1_PIG	Chloride intracellular channel protein 1	1	Cell membrane	0.597	-
36.6	26.06	Q29549	CLUS_PIG	Clusterin	15	Secreted. secretory vesicle	0.608	signal peptide predicted by SignalP
73.7	48.77	Q08092	CNN1_PIG	Calponin-1	49	cytoskeleton associated	0.516	-
11.5	5.63	Q08094	CNN2_PIG	Calponin-2	4	cytoskeleton associated	0.407	-
21.1	17.97	Q9TUQ3	CO7_PIG	Complement component C7	13	Secreted.	0.359	signal peptide predicted by SignalP
57.8	14.54	P10668	COF1_PIG	Cofilin-1	10	cytoskeleton.	0.666	-
52.4	13.43	Q5G6V9	COF2_PIG	Cofilin-2	9	cytoskeleton associated	0.683	-
49.5	8.21	Q99028	COMT_PIG	Catechol O-methyltransferase	5	Membrane	0.477	-
4.1	4.59	D2SW95	COPB_PIG	Coatomer subunit beta	3	Golgi apparatus membrane;	0.418	-
25.6	4.6	P04574	CPNS1_PIG	Calpain small subunit 1	4	Cytoplasm.	0.843	-
29.3	7.37	O19062	CRP_PIG	C-reactive protein	5	Secreted.	0.945	signal peptide predicted by SignalP
60	16	Q7M2W6	CRYAB_PIG	Alpha-crystallin B chain	8	Cytoplasm.	0.903	-
10.5	2.34	P62895	CYC_PIG	Cytochrome c	1	Mitochondrion.	0.521	-
27.5	3.01	Q29290	CYTB_PIG	Cystatin-B	2	Cytoplasm.	0.417	-
15.7	6.01	Q8MIZ3	DCPS_PIG	Scavenger mRNA-decapping enzyme DcpS	3	Cytoplasm.	0.585	-
70.5	80.17	P02540	DESM_PIG	Desmin	77	cytoskeleton	0.627	-
44.9	13.68	P60982	DEST_PIG	Destrin	10	ECM associated	0.622	-
24.3	6.01	Q8MJ30	DHPR_PIG	Dihydropteridine reductase	4	Cytoplasm	0.459	-
8.5	37.5	Q5GN48	DMD_PIG	Dystrophin	20	Cell membrane	0.273	-
7.5	5.94	Q29024	DX39B_PIG	Spliceosome RNA helicase	3	Cytoplasm.	0.441	-
6.7	2	P29412	EF1B_PIG	Elongation factor 1-beta	2	nucleus	0.402	-
18.8	10.58	Q29387	EF1G_PIG	Elongation factor 1-gamma	6	Cytoplasm	0.416	-
42.9	21.47	Q1KYT0	ENOB_PIG	Beta-enolase	17	Cytoplasm.	0.278	-
13.2	15.34	Q29092	ENPL_PIG	Endoplasmin	9	Endoplasmic reticulum lumen.	0.510	signal peptide predicted by SignalP
19.1	4.94	Q9GJT2	ESTD_PIG	S-formylglutathione hydrolase	4	Cytoplasm.	0.547	-
31.4	14.14	P00636	F16P1_PIG	Fructose-1,6-bisphosphatase 1	8	Cytoplasm	0.730	-
13.8	6.3	O97507	FA12_PIG	Coagulation factor XII	6	Secreted.	0.645	signal peptide predicted by SignalP
25.7	16.11	P16293	FA9_PIG	Coagulation factor IX	10	Secreted.	0.493	-
33.8	5.92	O02772	FABPH_PIG	Fatty acid-binding protein, heart	4	Cytoplasm.	0.512	-
4.3	2.01	Q29042	FCN1_PIG	Ficolin-1	1	Secreted.	0.786	signal peptide predicted by SignalP
13	4	Q29041	FCN2_PIG	Ficolin-2	2	Secreted.	0.756	signal peptide predicted by SignalP
34.8	24.57	P29700	FETUA_PIG	Alpha-2-HS-glycoprotein	28	Secreted.	0.640	signal peptide predicted by SignalP
100	2.82	P14460	FIBA_PIG	Fibrinogen alpha chain	2	Secreted.	_	_
36.1	5.18	Q9TTB4	FMOD_PIG	Fibromodulin	3	ECM associated	0.941	-
4.9	2.01	P10173	FUMH_PIG	Fumarate hydratase, mitochondrial	1	Mitochondrion.	0.455	-
36.9	22.21	P00355	G3P_PIG	Glyceraldehyde-3-phosphate dehydrogenase	12	exocytic pathway, cytosol	0.523	-
44.4	30.3	P08059	G6PI_PIG	Glucose-6-phosphate isomerase	17	Secreted.	0.494	-
28.4	14.05	Q9GKX6	GALM_PIG	Aldose 1-epimerase	7	Cytoplasm.	0.490	-
39.3	30.53	Q6Q7J2	GDIB_PIG	Rab GDP dissociation inhibitor beta	20	membrane associated	0.322	-
60.8	79.79	P20305	GELS_PIG	Gelsolin	65	cytoskeleton.	0.555	signal peptide predicted by SignalP
11.3	3.89	P12309	GLRX1_PIG	Glutaredoxin-1	2	Cytoplasm.	0.543	-
2.8	2	P0C5I2	GMPPB_PIG	Mannose-1-phosphate guanyltransferase beta	1	Mitochondrion	0.697	-
5	2.01	Q2XSV9	GNA11_PIG	Guanine nucleotide-binding protein subunit alpha-11	1	Cell membrane	0.378	-
2.8	2	P29797	GNAS_PIG	Guanine nucleotide-binding protein G	1	Cell membrane	0.605	-
17	4.02	Q8MJ14	GPX1_PIG	Glutathione peroxidase 1	3	Cytoplasm.	0.877	-
19.5	8.09	P34935	GRP78_PIG	78 kDa glucose-regulated protein	5	Cytoplasm	0.552	-
17	7.07	Q9N1F5	GSTO1_PIG	Glutathione S-transferase omega-1	4	Cytoplasm	0.516	-
66.2	22.54	P80031	GSTP1_PIG	Glutathione S-transferase P	17	Cytoplasm.	0.338	-
17.7	6.39	P12682	HMGB1_PIG	High mobility group protein B1	4	Nucleus.	0.068	-
18.1	2.03	P10859	HPLN1_PIG	Hyaluronan and proteoglycan link protein 1	3	ECM associated	0.504	signal peptide predicted by SignalP
13.3	3.83	Q45FY6	HPRT_PIG	Hypoxanthine-guanine phosphoribosyltransferase	2	Cytoplasm.	0.766	-
48.7	44.61	Q6S4N2	HS71B_PIG	Heat shock 70 kDa protein 1B	36	heats shock protein	0.291	-
26.8	22.52	A5A8V7	HS71L_PIG	Heat shock 70 kDa protein 1-like	18	heat shock proteins	0.343	-
38.3	47.71	O02705	HS90A_PIG	Heat shock protein 90 alpha	28	Heat shock proteins	0.174	-
74.9	26.28	Q5S1U1	HSPB1_PIG	Heat shock protein beta-1	21	Cytoplasm.	0.727	-
36.9	36.94	Q29545	ICA_PIG	Inhibitor of carbonic anhydrase	46	Secreted.	0.665	signal peptide predicted by SignalP
25.5	14.85	P12675	ICAL_PIG	Calpastatin	10	exocytic pathway, cytosol	0.039	-
12.5	2.01	P15175	ICTL_PIG	Cathelin	1	Secreted.	0.853	-
7.1	2.03	A6M931	IF4A3_PIG	Eukaryotic initiation factor 4A-III	2	Cytoplasm.	0.710	-
33.5	16.38	P26893	IL6_PIG	Interleukin-6	12	Secreted.	0.571	signal peptide predicted by SignalP
45.5	22.72	P80229	ILEU_PIG	Leukocyte elastase inhibitor (Serpin B1)	13	Cytoplasm.	0.509	-
11.2	4	O77591	IMPA1_PIG	Inositol monophosphatase 1	3	Cytoplasm.	0.561	-
2.4	2.02	Q9GLP0	ITB1_PIG	Integrin beta-1	1	Cell membrane	0.486	signal peptide predicted by SignalP
25.3	31.48	Q29052	ITIH1_PIG	Inter-alpha-trypsin inhibitor heavy chain H1	17	Secreted.	0.473	signal peptide predicted by SignalP
29.4	36.57	O02668	ITIH2_PIG	Inter-alpha-trypsin inhibitor heavy chain H2	20	Secreted.	0.523	signal peptide predicted by SignalP
47.5	58.05	P79263	ITIH4_PIG	Inter-alpha-trypsin inhibitor heavy chain H4	41	Secreted.	0.613	signal peptide predicted by SignalP
42.3	8.83	P00571	KAD1_PIG	Adenylate kinase isoenzyme 1	7	Cytoplasm.	0.818	-
9.5	3.4	P07802	KAP0_PIG	cAMP-dependent protein kinase type I-alpha regulatory subunit	2	Cell membrane.	0.442	-
3.4	2.01	P36887	KAPCA_PIG	cAMP-dependent protein kinase catalytic subunit alpha	1	Cell membrane.	0.340	-
19.6	4.01	Q29594	KCRB_PIG	Creatine kinase B-type	3	Cytoplasm.	0.557	-
33.9	17.73	Q5XLD3	KCRM_PIG	Creatine kinase M-type	15	Cytoplasm	0.220	-
11.7	4	Q29561	KCY_PIG	UMP-CMP kinase	2	Cytoplasm.	0.702	-
53	29.12	P00339	LDHA_PIG	L-lactate dehydrogenase A chain	21	Cytoplasm.	0.563	-
53.6	38.17	P00336	LDHB_PIG	L-lactate dehydrogenase B chain	20	Cytoplasm.	0.606	-
74.1	17.89	Q49I35	LEG1_PIG	Galectin-1	13	ECM associated	0.384	-
31.4	14.21	Q5PXT2	LMCD1_PIG	LIM and cysteine-rich domains protein 1	8	Cytoplasm.	0.346	-
49.5	62.88	Q3ZD69	LMNA_PIG	Prelamin-A/C	47	Nucleus.	0.061	-
42.5	16.55	P11708	MDHC_PIG	Malate dehydrogenase, cytoplasmic	11	Cytoplasm.	0.386	-
3.4	2	P79385	MFGM_PIG	Lactadherin	1	Cell membrane	0.511	-
37.8	36.35	P26042	MOES_PIG	Moesin	20	Cell membrane;	0.549	-
64.9	18.05	P02189	MYG_PIG	Myoglobin	10	Cytoplasm.	0.363	-
56.9	8.38	P81271	MYH11_PIG	Myosin-11	5	cytoskeleton associated	0.806	-
12.4	36.5	P79293	MYH7_PIG	Myosin-7	22	cytoskeleton associated	0.155	-
51	17.59	P60662	MYL6_PIG	Myosin light polypeptide 6	19	cytoskeleton associated	0.427	-
66.3	17.68	P29269	MYL9_PIG	Myosin regulatory light polypeptide 9	11	cytoskeleton associated	0.576	-
46.8	7.34	P79280	MYLK_PIG	Myosin light chain kinase, smooth muscle	4	cytoskeleton associated	0.856	-
11	3.94	P83686	NB5R3_PIG	NADH-cytochrome b5 reductase 3	2	Endoplasmic reticulum membrane;	0.382	-
59.9	13.3	Q2EN76	NDKB_PIG	Nucleoside diphosphate kinase B	8	Cytoplasm.	0.335	-
2.5	2.07	Q9BEC7	NPL_PIG	N-acetylneuraminate lyase	1	Cytoplasm.	0.427	-
35.6	5.69	P14287	OSTP_PIG	Osteopontin	5	Secreted.	0.777	signal peptide predicted by SignalP
6.4	2.77	Q863I2	OXSR1_PIG	Serine/threonine-protein kinase	2	Cytoplasm.	0.410	-
28.9	11.97	P79335	PAI1_PIG	Plasminogen activator inhibitor 1	8	Secreted.	0.697	signal peptide predicted by SignalP
16.2	9.21	Q6QGC0	PDLI3_PIG	PDZ and LIM domain protein 3	6	Cytoplasm	0.601	-
6.5	2.06	O46560	PDXK_PIG	Pyridoxal kinase	1	Cytoplasm.	0.530	-
5.3	2.03	P51525	PF12_PIG	Prophenin-2	1	Secreted.	0.338	signal peptide predicted by SignalP
8.1	2.03	P32194	PG1_PIG	Protegrin-1	1	Secreted.	0.695	signal peptide predicted by SignalP
8.2	2.03	P32195	PG2_PIG	Protegrin-2	1	Secreted.	0.889	signal peptide predicted by SignalP
8.1	2.03	P32196	PG3_PIG	Protegrin-3	1	Secreted.	0.629	signal peptide predicted by SignalP
8.1	2.03	P49933	PG4_PIG	Protegrin-4	1	Secreted.	0.904	signal peptide predicted by SignalP
8.1	2.03	P49934	PG5_PIG	Protegrin-5	1	Secreted.	0.898	signal peptide predicted by SignalP
50.6	35.65	Q7SIB7	PGK1_PIG	Phosphoglycerate kinase 1	25	Cytoplasm.	0.404	-
3.2	2	Q866Y3	PGRP2_PIG	N-acetylmuramoyl-L-alanine amidase	1	ECM associated	0.663	signal peptide predicted by SignalP
25.4	9.85	Q9GKQ6	PGS1_PIG	Biglycan	6	ECM associated	0.877	signal peptide predicted by SignalP
21.7	10.81	Q9XSD9	PGS2_PIG	Decorin (Dermatan sulfate)	6	ECM associated	0.529	signal peptide predicted by SignalP
55.1	7.81	P80895	PIMT_PIG	Protein-L-isoaspartate(D-aspartate) O-methyltransferase	8	Cytoplasm.	0.512	-
24.7	15.85	P06867	PLMN_PIG	Plasminogen	19	Secreted.	0.472	signal peptide predicted by SignalP
23.8	2.45	O18734	PP14A_PIG	Protein phosphatase 1 regulatory subunit 14A	2	Cytoplasm.	0.672	-
31.2	13.18	P61292	PP1B_PIG	Serine/threonine-protein phosphatase PP1-beta catalytic subunit	10	Cytoplasm.	0.604	-
15.9	4.01	P67776	PP2AA_PIG	Serine/threonine-protein phosphatase 2A catalytic subunit	3	Cytoplasm.	0.419	-
12.3	4.01	P11493	PP2AB_PIG	Serine/threonine-protein phosphatase 2A catalytic subunit beta	2	Cytoplasm.	0.461	-
4.6	4.06	P23687	PPCE_PIG	Prolyl endopeptidase	2	Cytoplasm.	0.544	-
50.6	16.86	P62936	PPIA_PIG	Peptidyl-prolyl cis-trans isomerase A	13	Cytoplasm. Secreted.	0.319	-
42.5	10.56	P52552	PRDX2_PIG	Peroxiredoxin-2	10	Cytoplasm.	0.629	-
67.4	21.17	Q9TSX9	PRDX6_PIG	Peroxiredoxin-6	12	Cytoplasm. Lysosome.	0.360	-
17.4	10.04	Q9GLP2	PROC_PIG	Vitamin K-dependent protein C	6	Secreted	0.848	signal peptide predicted by SignalP
37.3	14.66	Q64L94	PSME1_PIG	Proteasome activator complex subunit 1	9	Cytoplasm	0.176	-
28	7.67	Q863Z0	PSME2_PIG	Proteasome activator complex subunit 2	4	Cytoplasm.	0.392	-
16.3	6.02	Q29099	PTBP1_PIG	Polypyrimidine tract-binding protein 1	4	Nucleus.	0.423	-
6.3	2	Q29095	PTGDS_PIG	Prostaglandin-H2 D-isomerase	1	Golgi apparatus.	0.862	signal peptide predicted by SignalP
11.6	4	Q52NJ6	RAB14_PIG	Ras-related protein Rab-14	2	Golgi apparatus	0.377	-
22.4	8.01	Q52NJ2	RAB1A_PIG	Ras-related protein Rab-1A	4	Endoplasmic reticulum.	0.396	-
22.9	8.01	Q06AU7	RAB1B_PIG	Ras-related protein Rab-1B	4	membrane associated	0.392	-
21.3	18.08	P26044	RADI_PIG	Radixin	10	Cell membrane;	0.299	-
11.1	2.36	Q52NJ1	RB11A_PIG	Ras-related protein Rab-11A	2	Cell membrane exocytic pathway	0.506	-
19.4	4.79	P27485	RET4_PIG	Retinol-binding protein 4	3	Secreted.	0.788	signal peptide predicted by SignalP
27.6	11	P10775	RINI_PIG	Ribonuclease inhibitor	7	Cytoplasm.	0.515	-
7.9	2.77	P53027	RL10A_PIG	60S ribosomal protein L10a	2	Cytoplasm.	0.758	-
5.1	2.02	Q95307	RL13A_PIG	60S ribosomal protein L13a	1	Cytoplasm.	0.807	-
11.2	2	Q95281	RL29_PIG	60S ribosomal protein L29	1	Cytoplasm	0.551	-
26.6	4.54	P63053	RL40_PIG	Ubiquitin-60S ribosomal protein L40	3	Cytoplasm.	0.682	-
30.5	6.38	Q29214	RLA0_PIG	60S acidic ribosomal protein P0	5	Cytoplasm.	0.148	-
27	5.2	Q29315	RLA2_PIG	60S acidic ribosomal protein P2	3	Cytoplasm	0.306	-
1.2	2.02	Q2VJ60	RN19A_PIG	E3 ubiquitin-protein ligase	1	Membrane	0.182	-
20.4	2.06	P15468	RNAS4_PIG	Ribonuclease 4	2	Secreted.	0.908	signal peptide predicted by SignalP
3.3	3.23	Q9GMB0	RPN1_PIG	Dolichyl-diphosphooligosaccharide protein glycosyltransferase	2	Endoplasmic reticulum	0.312	signal peptide predicted by SignalP
48.5	4.98	P46405	RS12_PIG	40S ribosomal protein S12	5	Cytoplasm.	0.661	-
6.8	2	Q29201	RS16_PIG	40S ribosomal protein S16	1	Cytoplasm.	0.735	-
17.4	2	Q6QAT1	RS28_PIG	40S ribosomal protein S28	1	Cytoplasm	0.522	-
10.7	3.16	Q0Z8U2	RS3_PIG	40S ribosomal protein S3	2	Cytoplasm.	0.490	-
27.5	6.42	Q4GWZ2	RSSA_PIG	40S ribosomal protein SA	6	Cytoplasm.	0.620	-
12	2	A1XQR9	RUXE_PIG	Small nuclear ribonucleoprotein E	1	Nucleus	0.520	-
66.7	14.86	Q2EN75	S10A6_PIG	Protein S100-A6	10	Cell membrane	0.485	-
17.7	2	P04163	S10AA_PIG	Protein S100-A10	1	Cell membrane	0.120	-
62.6	6.01	P31950	S10AB_PIG	Protein S100-A11	7	Cytoplasm.	0.584	-
23.6	16.06	Q710C4	SAHH_PIG	Adenosylhomocysteinase	9	Cytoplasm	0.494	-
11.9	4	Q8HZJ6	SDC4_PIG	Syndecan-4	2	membrane associated	0.328	signal peptide predicted by SignalP
68.6	12.22	P04178	SODC_PIG	Superoxide dismutase [Cu-Zn]	7	Cytoplasm.	0.599	-
24.3	7.74	P20112	SPRC_PIG	SPARC	5	exocytic pathway, cell membrane	0.932	signal peptide predicted by SignalP
30.4	6.01	P28220	SRBS2_PIG	Sorbin and SH3 domain-containing protein 2	3	cytoskeleton associated	0.823	-
8.1	2.19	Q6DUB7	STMN1_PIG	Stathmin	1	cytoskeleton associated	0.720	-
12.6	2	P61958	SUMO2_PIG	Small ubiquitin-related modifier 2	1	Cytoplasm	_	_
47.2	22.4	P02550	TBA1A_PIG	Tubulin alpha-1A chain	17	cytoskeleton.	0.438	-
55	29.71	Q2XVP4	TBA1B_PIG	Tubulin alpha-1B chain	21	cytoskeleton associated	0.472	-
59.1	36.29	P02554	TBB_PIG	Tubulin beta chain	24	cytoskeleton.	0.526	-
60.4	38.35	Q767L7	TBB5_PIG	Tubulin beta chain 5	25	cytoskeleton associated	0.494	-
13.9	31.53	Q29116	TENA_PIG	Tenascin	18	ECM associated	0.365	signal peptide predicted by SignalP
44.7	45.27	P03974	TERA_PIG	Transitional endoplasmic reticulum ATPase	29	Cytoplasm	0.168	-
0.8	2.01	Q06AK6	TFP11_PIG	Tuftelin-interacting protein 11	1	Cytoplasm.	0.189	-
6.8	4.05	Q9TT35	THBG_PIG	Thyroxine-binding globulin	3	Secreted.	0.844	signal peptide predicted by SignalP
37.1	9.41	P82460	THIO_PIG	Thioredoxin	6	Cytoplasm.	0.668	-
2.2	2.03	P47788	THOP1_PIG	Thimet oligopeptidase	1	Cytoplasm.	0.361	-
29	18.64	Q19AZ8	THRB_PIG	Prothrombin	13	Secreted.	0.638	signal peptide predicted by SignalP
21.7	5.28	P35624	TIMP1_PIG	Metalloproteinase inhibitor 1	3	Secreted.	0.579	signal peptide predicted by SignalP
59.3	21.34	Q29371	TPIS_PIG	Triosephosphate isomerase	16	Cytoplasm	0.341	-
70.1	71.56	P42639	TPM1_PIG	Tropomyosin alpha-1 chain	63	cytoskeleton.	0.589	-
42.3	42.93	A1XQV4	TPM3_PIG	Tropomyosin alpha-3 chain	35	cytoskeleton	0.533	-
60.5	40.8	P67937	TPM4_PIG	Tropomyosin alpha-4 chain	36	Cytoplasm. cytoskeleton.	0.417	-
19.7	18.93	P14632	TRFL_PIG	Lactotransferrin	10	Secreted.	0.520	signal peptide predicted by SignalP
48.7	8	P50390	TTHY_PIG	Transthyretin	5	Secreted.	0.855	signal peptide predicted by SignalP
77.3	14.01	Q95274	TYB4_PIG	Thymosin beta-4	9	cytoskeleton associated	0.734	-
2.7	2	Q4R1H1	TYRP2_PIG	L-dopachrome tautomerase	1	cell membrane	0.571	signal peptide predicted by SignalP
7.5	2	Q06AA9	UB2D2_PIG	Ubiquitin-conjugating enzyme E2 D2	1	Cytoplasm.	0.876	-
44.7	4.54	P0CG68	UBC_PIG	Polyubiquitin-C	3	Cytoplasm.	0.352	-
21.1	13.51	P79303	UGPA_PIG	UTP--glucose-1-phosphate uridylyltransferase	8	Cytoplasm.	0.337	-
3.4	2.03	P04185	UROK_PIG	Urokinase-type plasminogen activator	1	Secreted.	0.624	signal peptide predicted by SignalP
10.7	4	A5GFS8	VAPB_PIG	Vesicle-associated membrane protein	2	Endoplasmic reticulum membrane	0.225	-
12.8	8	Q29048	VATA_PIG	V-type proton ATPase catalytic subunit A	5	membrane organelles	0.442	-
4.8	2.09	Q9TVC1	VATH_PIG	V-type proton ATPase subunit H	1	Membrane	0.428	-
64.7	59.81	P02543	VIME_PIG	Vimentin	58	cytoskeleton	0.564	-
56.8	114.27	P26234	VINC_PIG	Vinculin	110	Cell junction. focal adhesion.	0.206	-
26.6	14.03	P48819	VTNC_PIG	Vitronectin	9	ECM associated	0.929	signal peptide predicted by SignalP
0.8	2.02	Q28833	VWF_PIG	von Willebrand factor	1	Secreted	0.408	-
(1) Amino acid protein coverage with 95% of ID probability. (2) Uniprot accession code. (3) Gene and protein name. (4) Number of peptides identified with 95% of probability. (5) Gene Ontology localization (http://geneontology.org/). (6) SecretomeP software scores. >0.5 indicates a strong probability of secretion (black numbers). (6) SignalP software prediction of classical secretion (by signal pe…
